1 **A cytoskeletal network maintains filament shape in the multicellular cyanobacterium**  
2 ***Anabaena* sp. PCC 7120**

3

4 Benjamin L. Springstein<sup>1\*</sup>, Dennis J. Nürnberg<sup>2,†</sup>, Ann-Katrin Kieninger<sup>3</sup>, Christian Woehle<sup>1,‡</sup>,  
5 Julia Weissenbach<sup>1,‡</sup>, Marius L. Theune<sup>1</sup>, Andreas O. Helbig<sup>4</sup>, Andreas Tholey<sup>4</sup>, Iris Maldener<sup>3</sup>,  
6 Tal Dagan<sup>1</sup>, Karina Stucken<sup>5\*\*</sup>

7

8 <sup>1</sup> Institute of General Microbiology, Christian-Albrechts-Universität zu Kiel, Kiel, Germany

9 <sup>2</sup> Department of Life Sciences, Imperial College, London SW7 2AZ, United Kingdom

10 <sup>3</sup> Department of Microbiology/Organismic Interactions, University of Tübingen, Tübingen,  
11 Germany

12 <sup>4</sup> AG Proteomics & Bioanalytics, Institute for Experimental Medicine, Christian-Albrechts-  
13 Universität zu Kiel, Kiel, Germany

14 <sup>5</sup> Department of Food Engineering, University of La Serena, La Serena, Chile.

15

16 <sup>†</sup> Present address: Institute of Experimental Physics, Free University of Berlin, Berlin, Germany

17 <sup>‡</sup> Present address: Max Planck Institute for Plant Breeding Research, Max Planck-Genome-  
18 center Cologne, Cologne, Germany

19 <sup>‡</sup> Present address: Faculty of Biology, Technion-Israel Institute of Technology, Haifa, 32000,  
20 Israel

21

22 \* Corresponding authors: KS [kstucken@userena.cl](mailto:kstucken@userena.cl); BLS [bspringstein@ifam.uni-kiel.de](mailto:bspringstein@ifam.uni-kiel.de)

## 23 **Abstract**

24 The determinants of bacterial cell shape are extensively studied in unicellular forms.  
25 Nonetheless, the mechanisms that shape bacterial multicellular forms remain understudied.  
26 Here we study coiled-coil rich proteins (CCRPs) in the multicellular cyanobacterium *Anabaena*  
27 sp. PCC 7120 (hereafter *Anabaena*). Our results reveal two CCRPs, termed LfiA and LfiB (for  
28 linear filament), which assemble into a heteropolymer that traverses the longitudinal cell axis.  
29 Two additional CCRPs, CypS (for cyanobacterial polar scaffold) and CeaR (for cyanobacterial  
30 elongasome activity regulator), form a polar proteinaceous scaffold and regulate MreB activity,  
31 respectively. Deletion mutants of these CCRPs are characterized by impaired filament shape  
32 and decreased viability. Our results indicate that the four CCRPs form a proteinaceous network  
33 that stabilizes the *Anabaena* multicellular filament. We propose that this cytoskeletal network  
34 is essential for the manifestation of the linear filament phenotype in *Anabaena*.

## 35 **Introduction**

36 Bacterial multicellularity ranges from transient associations, such as colonies and biofilms to  
37 permanent multicellular forms<sup>1</sup>. The basic characteristics of prokaryotic organisms that are  
38 considered as multicellular are mechanisms of cell-cell adhesion and intercellular  
39 communication<sup>2</sup>. Biofilms are considered as transient forms of prokaryotic multicellularity since  
40 they lack a reproducible multicellular shape<sup>3</sup>. The shape of the individual cell has been shown  
41 to have a strong impact on the spatial biofilm formation. Example is the different composition  
42 of cell morphologies within an *Escherichia coli* biofilm<sup>4</sup>. Studies of biofilm formation in  
43 *Rhodobacter sphaeroides* showed that wild type (WT) rod-shaped cells readily form biofilms  
44 on costal water surfaces, while coccoid-like cells that were treated with an inhibitor of MreB –  
45 a well-known cell shape determinant – lacked the ability to form biofilms and failed to attach to  
46 surfaces<sup>5</sup>. Hence, cytoskeletal structures that determine cell shape through the remodeling of  
47 the peptidoglycan (PG) sheet are key regulators of biofilm formation, specifically in  
48 environments that are subjected to constant changes<sup>5-8</sup>. MreB, together with the elongasome



49 (a multi-enzyme complex), is a regulator of longitudinal PG biogenesis, and thus it plays a  
50 crucial role in the adaption to different environments and prokaryotic multicellularity.

51 The key hallmarks of permanent bacterial multicellularity are morphological  
52 differentiation and a well-defined and reproducible shape, termed patterned multicellularity<sup>3</sup>.  
53 Unlike biofilms, patterned multicellular structures are the result of either coordinated swarming  
54 or developmental aggregation behavior as in myxobacteria<sup>9</sup>. Additional factors include cell  
55 division, proliferation and cell differentiation as in sporulating actinomycetes<sup>10</sup> and  
56 cyanobacterial filaments<sup>11,12</sup>. In myxobacteria as well as in actinomycetes, it has been shown  
57 that patterned multicellular traits are dependent on the coordinated function of different coiled-  
58 coil-rich proteins (CCRPs). Reminiscent of eukaryotic intermediate filaments (IFs)<sup>13,14</sup>, many  
59 bacterial CCRPs were shown to perform analogous cytoskeletal functions through their ability  
60 to self-assemble into distinct filaments *in vitro* and *in vivo*<sup>15-19</sup>. Unlike FtsZ or MreB<sup>20,21</sup>,  
61 bacterial IF-like CCRPs do not require any additional co-factors for polymerization *in vitro*<sup>22</sup>.  
62 For example, in *Myxococcus xanthus*, the coordinated swarming and aggregation into fruiting  
63 bodies is mediated by its gliding motility<sup>23</sup>, which strictly depends on the filament-forming  
64 CCRP AglZ<sup>24</sup>. AglZ is organized in a large multi-protein complex that governs gliding motility  
65 in synergy with MreB, which still retained its PG synthesis function but was also co-opted for  
66 gliding motility in *M. xanthus*<sup>25-28</sup>. Actinobacteria, such as *Streptomyces* species, grow by  
67 building new cell wall (i.e. PG) only at the cell poles, independent of MreB<sup>29,30</sup>, which is  
68 strikingly different from how most other bacteria grow<sup>31</sup>. This characteristic polar growth mode  
69 is organized by a cytoskeletal network of at least three CCRPs - DivIVA, Scy and FilP – that  
70 form the polarisome<sup>16,17,32,33</sup>. Similar to eukaryotic intermediate filaments (IFs), FilP and Scy  
71 self-assemble into filaments *in vitro*<sup>17,32</sup>, thereby fulfilling a major criterium of cytoskeletal  
72 proteins<sup>34</sup>. Although of essential importance for growth and cell shape, the polarisome is not  
73 directly involved in the hallmark patterned multicellular trait of Actinobacteria. In contrast,  
74 patterned multicellularity in Actinobacteria is governed by a highly reproducible and  
75 coordinated cell division event during sporulation where up to 100 FtsZ-driven Z-rings are

76 formed. This then leads to the formation of evenly spaced septa, resulting in long chains of  
77 spores<sup>3,35</sup>.

78 Cyanobacteria are characterized by a large phenotypic diversity, ranging from  
79 unicellular species to complex filamentous cyanobacteria of which some can undergo  
80 morphological differentiation<sup>36</sup>. Filamentous cyanobacteria that differentiate multiple cell types  
81 are considered the peak of prokaryotic complexity. The cell biology of multicellular  
82 cyanobacteria has been studied in the context of cytoplasmic continuity, intercellular  
83 communication, and cell differentiation<sup>37</sup>. Species of the Nostocaceae are characterized by the  
84 formation of linear filaments, where equally interspaced heterocysts (specialized cells for  
85 nitrogen fixation) are differentiated upon nitrogen starvation in a highly reproducible pattern<sup>37</sup>.  
86 Studies of multicellular growth in the model multicellular cyanobacterium *Anabaena* showed  
87 that FtsZ - the prokaryotic tubulin homolog - is an essential protein that localizes to future  
88 septum sites in a typical Z-ring structure, while MreB - the prokaryotic actin homolog -  
89 determines the cell shape of a single cell within an *Anabaena* filament but is dispensable for  
90 filament viability<sup>38,39</sup>. Deletion of MreB<sup>39</sup> or of a class B penicillin-binding-protein (PBP)<sup>40</sup>  
91 resulted in swollen and rounded cell morphotypes, a phenotype commonly associated with  
92 defects in PG biogenesis<sup>41,42</sup>. As a true-multicellular organism, *Anabaena* contains functional  
93 analogs to the eukaryotic gap-junctions, termed septal junctions, which facilitate intercellular  
94 communication<sup>43</sup> by direct cell connections<sup>44</sup>. These structures involve the septum localized  
95 proteins SepJ, FraC and FraD<sup>37,45,46</sup> and a nanopore array in the septal PG<sup>47</sup>. The importance  
96 of SepJ, FraC and FraD for multicellularity in *Anabaena* is highlighted by a defect in filament  
97 integrity and a resulting loss of multicellularity under diazotrophic growth conditions in strains  
98 lacking any of the three genes<sup>46,48-50</sup>. Besides the canonical cytoskeletal proteins FtsZ and  
99 MreB, no other cytoskeletal proteins have been described in *Anabaena*. Here we study the  
100 contribution of coiled-coil-rich filament-forming proteins to the *Anabaena* phenotype. For this  
101 purpose, we predicted *Anabaena* CCRPs with presumed IF-like functions and evaluated their  
102 cytoskeletal properties using *in vivo* and *in vitro* approaches.

103 **Results**

104 **Prediction of CCRP candidates in *Anabaena***

105 Potential filament-forming proteins were predicted computationally by surveying the *Anabaena*  
106 genome for CCRPs, which putatively have IF-like function<sup>15,24,32,51,52</sup>. *Anabaena* CCRPs were  
107 filtered according to the presence of a central rod-domain, which is characteristic to eukaryotic  
108 IF and prokaryotic IF-like proteins<sup>14,53,54</sup>. Similar to Bagchi *et al.* (2008), who identified the  
109 filament-forming CCRP FilP in *Streptomyces coelicolor*<sup>32</sup>, we defined the presence of a rod-  
110 domain as 80 amino acids in coiled-coil conformation. This analysis resulted in the  
111 identification of 186 rod-domain-containing CCRPs (Supplementary File 1). The 186 CCRPs  
112 were further filtered to include only hypothetical proteins of unknown function, yielding a set of  
113 13 candidates for further analysis (Supplementary Fig. 1 and Supplementary Table 1). The  
114 distribution of homologs to these 13 candidates in cyanobacteria showed that eight *Anabaena*  
115 CCRPs have homologs in multicellular cyanobacteria as well as in unicellular cyanobacteria  
116 while five have homologs present only in multicellular cyanobacteria (Fig. 1a; Supplementary  
117 Table 1).

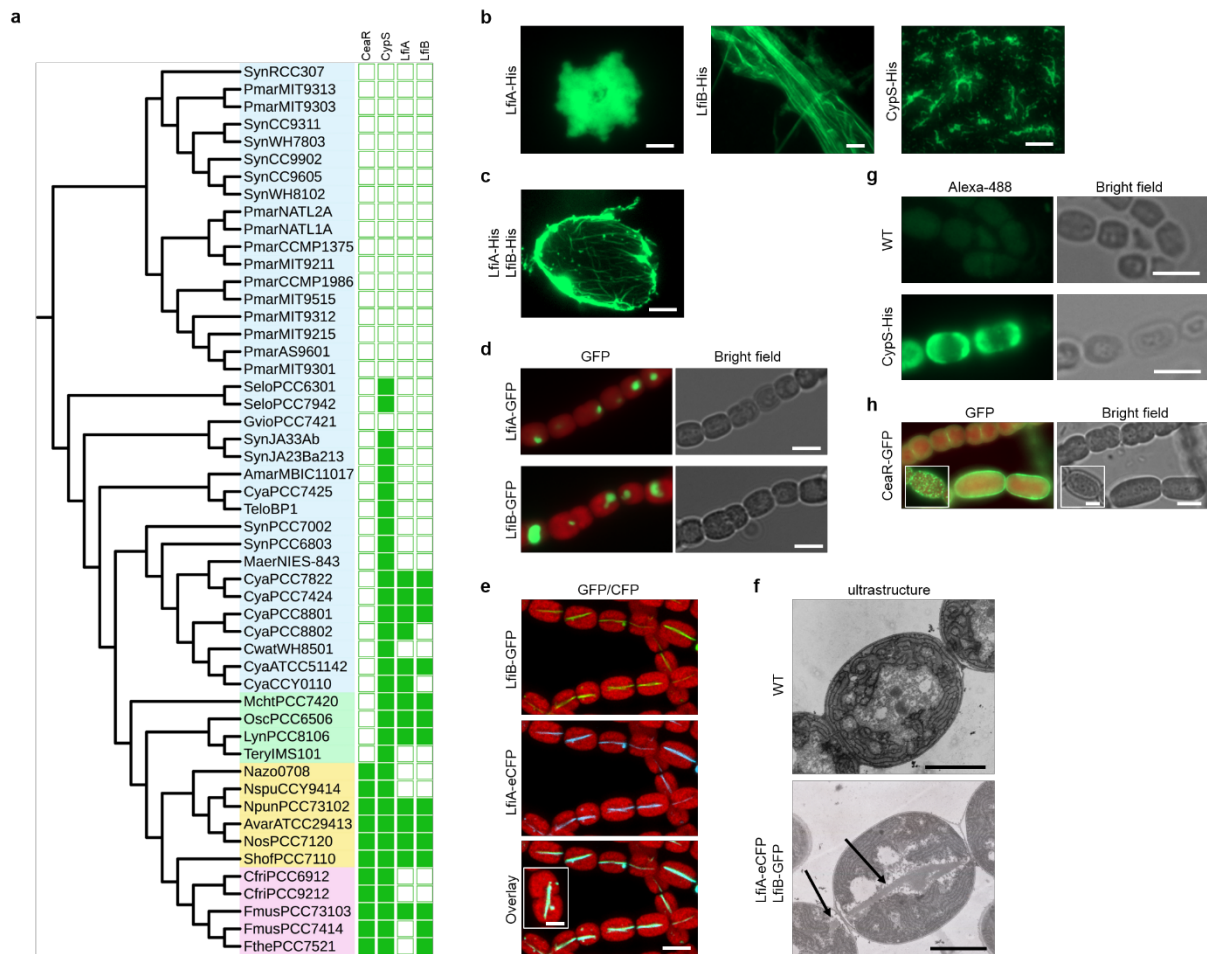

118

119 **Fig. 1: Cyanobacterial CCRPs polymerize *in vitro* and *in vivo***

120 (a) Distribution of protein candidate homologs in cyanobacteria. Organism names include the genus first letter and  
 121 species first three letters. The presence of homologous genes is marked by a green rectangle. Organism names  
 122 are shaded according to cell or colony morphology; blue: unicellular, green: filamentous, yellow: filamentous and  
 123 heterocyst forming, pink: heterocyst forming and true branching or multiserial filaments. Homologs accession  
 124 numbers are supplied in Supplementary File 2. (b-c) Epifluorescence micrographs of NHS-Fluorescein-stained *in vitro*  
 125 filaments formed by purified and renatured (b) LfiA-His (1 mg ml<sup>-1</sup>), LfiB-His (0.5 mg ml<sup>-1</sup>) and CypS-His (0.5  
 126 mg ml<sup>-1</sup>) or (c) co-renatured LfiA-His and LfiB-His (0.25 mg ml<sup>-1</sup> each) in 25 mM HEPES, pH 7.4 (LfiB), HLB (LfiA  
 127 and co-renatured LfiA/B) or PLB (CypS) renaturation buffer. (d) Merged GFP-fluorescence and chlorophyll  
 128 autofluorescence (red) and bright field micrographs of *Anabaena* WT cells expressing LfiA-GFP or LfiB-GFP from  
 129 P<sub>petE</sub>. LfiA-GFP-expressing cells were grown in BG11 without copper and induced for 2 d with 1 μM CuSO<sub>4</sub>. LfiB-  
 130 GFP-expressing cells were grown in BG11<sub>0</sub>. (e) Merged GFP and/or eCFP fluorescence and chlorophyll  
 131 autofluorescence (red) micrographs of *Anabaena* WT cells co-expressing LfiA-eCFP and LfiB-GFP from P<sub>petE</sub>  
 132 and grown in BG11<sub>0</sub>. Localization of LfiA/B grown in BG11 is depicted in Supplementary Fig. 7. (f) Electron micrographs  
 133 of ultrathin sections of *Anabaena* WT and *Anabaena* cells co-expressing LfiA-eCFP and LfiB-GFP. Black arrows  
 134 indicate electron-dense structures coinciding with the LfiA/B heteropolymer observed in Fig. 1e. Filaments appear  
 135 to anchor or attach to the cell poles. (g) Alexa Fluor 488 and bright field micrographs of anti-His immunofluorescence  
 136 staining of *Anabaena* WT and *Anabaena* cells expressing CypS-His from P<sub>petE</sub> grown in liquid BG11<sub>0</sub> supplemented  
 137 with 0.25 μM CuSO<sub>4</sub> for 2 d. Polar sites loaded with CypS-His plugs coincide with sites of retracted chlorophyll  
 138 autofluorescence observed prior to immunofluorescence (Supplementary Fig. 6b). (h) Merged GFP fluorescence  
 139 and chlorophyll autofluorescence and bright field micrographs of *Anabaena* WT cells expressing CeaR-GFP from  
 140 P<sub>petE</sub> grown on BG11. Notably, no enlarged cells were identified in the Δ*ceaR* mutant strain expressing CeaR-GFP  
 141 from P<sub>ceaR</sub> (Supplementary Fig. 8a), indicating that CeaR level in WT cells is tightly regulated. Inlay shows patchy  
 142 and cell periphery-localized CeaR-GFP. N-terminal YFP translational fusion of CCRPs did not reveal coherent  
 143 structures, suggesting that the N-terminus is essential for protein localization. Scale bars: 5 μm, (e) 1.25 μm, (f) 1.6  
 144 μm or (h inlay) 2.5 μm.

## 145 ***In vivo and in vitro* filamentation of CCRP candidates**

146 Out of the 13 candidates, four CCRPs showed self-association and filamentation properties,  
147 including LfiA together with LfiB, CypS and All4981 (that will be investigated in a separate  
148 report). The remaining nine candidates failed to form filamentous structures *in vivo* and *in vitro*  
149 and consequently were excluded from further analysis. An exception is CeaR whose  
150 computational structural prediction suggested similarity to the well-characterized prokaryotic  
151 IF-like protein crescentin from *Caulobacter crescentus*<sup>15</sup> (Supplementary Table 1). To evaluate  
152 the ability of candidate CCRPs to self-associate, we ectopically expressed C and N-terminally  
153 tagged (His<sub>6</sub>, YFP, eCFP or GFP) recombinant proteins and investigated *in vitro* polymerization  
154 properties and *in vivo* localization pattern. The assembly of CCRPs into filaments *in vitro* was  
155 tested by fluorescence microscopy using the NHS-Fluorescein dye, which was previously  
156 successfully used to visualize FtsZ filaments<sup>55</sup>. For this, we purified His<sub>6</sub>-tagged candidates by  
157 Ni-NTA affinity chromatography under denaturing conditions and renatured them by dialysis  
158 followed by NHS-fluorescein staining. As a positive control for our approach we used  
159 crescentin<sup>15,56</sup>. The NHS-fluorescein staining of crescentin revealed an extensive filamentous  
160 network in our *in vitro* assay (Supplementary Fig. 2). As negative controls, we included empty  
161 vector-carrying BL21 (DE3) cells, GroEL1.2 from *Chlorogloeopsis fritschii* PCC 6912 (known  
162 to self-interact<sup>57</sup>) and the maltose binding protein (MBP), all of which were tested negatively  
163 for filament formation *in vitro* using our approach (Supplementary Fig. 2).

## 164 **LfiA and LfiB are interdependent for polymerization *in vitro* and *in vivo***

165 Since the candidate proteins were annotated as hypothetical proteins, we initially investigated  
166 and confirmed the transcription of all four genes under standard (BG11) and diazotrophic  
167 (BG11<sub>0</sub>) growth conditions (Supplementary Fig. 3a,b). An additional inspection of the genomic  
168 loci suggested that *lfiA* and *lfiB* are encoded in an operon structure, however, RT-PCR data  
169 indicated that they are not co-transcribed (Supplementary Fig. 3a,c). Applying our *in vitro*  
170 polymerization assay to LfiA revealed amorphous non-filamentous aggregates while LfiB  
171 assembled into sheet-like filamentous structures (Fig. 1b). Nonetheless, most LfiB precipitated

172 upon renaturation, suggesting that LfiB has only a partial capacity to form filaments. Next,  
173 inspired by the close genomic localization of *lfiA* and *lfiB*, we tested for co-polymerization of  
174 both proteins. Upon co-renaturation, LfiA and LfiB assembled into a meshworks of  
175 heteropolymers (Fig. 1c). This demonstrates that LfiA and LfiB are interdependent for  
176 filamentous assembly *in vitro*. To examine the *in vivo* localization pattern of LfiA and LfiB, we  
177 expressed translational GFP fusions of both proteins from the replicative pRL25C plasmid, a  
178 derivate of the pDU1 plasmid<sup>58</sup>, which is commonly used in experimental work in  
179 *Anabaena*<sup>39,59,60</sup>. The expression of LfiA-GFP and LfiB-GFP from their respective native  
180 promoters (as predicted using BPROM<sup>61</sup>) revealed no discernible expression of LfiB-GFP  
181 (Supplementary Fig. 4a). Consequently, we investigated the *in vivo* localization of both proteins  
182 from the frequently used copper-regulated *petE* promoter ( $P_{petE}$ )<sup>59,60,62,63</sup>, which has been  
183 previously used to study the localization of FtsZ and MreB in *Anabaena*<sup>39,59,60</sup>. We generally  
184 observed that the  $P_{petE}$ -driven gene expression does not always lead to expression of the  
185 translational fusion protein in every cell under standard growth conditions (BG11 medium).  
186 Notably, this was not observed under diazotrophic growth conditions (i.e. BG11<sub>0</sub>) or upon  
187 supplementation with additional CuSO<sub>4</sub>, where we saw more pronounced expression. The  
188 expression of LfiA-GFP and LfiB-GFP from  $P_{petE}$  in *Anabaena* independently did not reveal  
189 filamentous structures (Fig. 1d). However, upon co-expression of LfiA-eCFP and LfiB-GFP  
190 from  $P_{petE}$ , a distinct filamentous structure along the longitudinal cell axis could be observed  
191 (Fig. 1e). To confirm that the localization of LfiA-GFP and LfiB-GFP is not affected by the  
192 wildtype (WT) *lfiA* or *lfiB* alleles, we localized both proteins in a  $\Delta lfiA\Delta lfiB$  double mutant strain.  
193 This experiment revealed the same localization pattern as in the WT (Supplementary Fig. 4b),  
194 suggesting that co-polymerization is a dosage-dependent process. In support of this idea, we  
195 only observed pronounced *in vitro* co-polymerization with equal amounts of LfiA-His and LfiB-  
196 His (Supplementary Fig. 5). We further validated the co-polymerization of LfiA and LfiB by  
197 heterologous expression in the  $\Delta lfiA\Delta lfiB$  double mutant background and in *E. coli*; both  
198 experiments revealed the same interdependent polymerization pattern (Supplementary Fig. 4c  
199 and 7). The intracellular localization of the LfiA/LfiB heteropolymer in *Anabaena* suggests that



200 the polymer is either anchored at the cell poles or specifically broken up during cell division,  
201 as LfiA/LfiB filaments were never observed to cross cell-cell borders and only traversed  
202 through not yet fully divided cells (Figs. 1e inlay and 1f). Our results so far suggest that LfiA  
203 and LfiB form a heteropolymer *in vitro* and *in vivo* and that heteropolymer assembly may  
204 depend on LfiA and LfiB relative dosage.

### 205 **CypS localizes to the cell poles in *Anabaena***

206 The *in vitro* polymerization assay of CypS revealed that CypS assembled into star-like  
207 structures of short filamentous strings (Fig. 1b). The expression of CypS-GFP in *Anabaena*  
208 WT cells from the predicted native promoter ( $P_{cypS}$ ; using BPRM) did not reveal coherent  
209 fluorescence signals (Supplementary Fig. 6a). However, when expressed from  $P_{petE}$ , CypS-  
210 GFP was localized to the cytosol and the cell envelope (Supplementary Fig. 5a). The same  
211 localization to the cell envelope and the cytoplasm was also observed upon expression of  
212 CypS-GFP from  $P_{cypS}$  in a  $\Delta cypS$  mutant background (Supplementary Fig. 5a). Notably, CypS-  
213 GFP only partially complemented the  $\Delta cypS$  mutant swollen cell phenotype (Supplementary  
214 Fig. 6a). Consequently, we examined whether the addition of a C-terminal His-tag may  
215 reconstitute the CypS WT phenotype and found that CypS-His forms a functional protein fusion  
216 (Supplementary Fig 9a,c). Immunolocalization of CypS-His in *Anabaena* WT revealed that the  
217 protein forms large plugs at the cell poles (Fig. 1g) that appeared to displace the thylakoid  
218 membranes (Supplementary Fig. 6b). This suggests that the comparably large C-terminal GFP  
219 tag negatively affects CypS localization *in vivo*. However, upon additional induction of CypS-  
220 GFP expression, polar assemblies can also be seen (Supplementary Fig. 6a), suggesting that  
221 the GFP-tag only partially interferes with CypS localization. Further induction of CypS-His  
222 expression also resulted in the formation of swollen cells (Supplementary Fig. 6b), indicating  
223 that CypS has morphogenic properties. To test for a possible interplay between LfiA/LfiB and  
224 CypS we tested for the localization of LfiA/LfiB in the  $\Delta cypS$  mutant strain. This revealed that  
225 in the absence of CypS, LfiA and LfiB co-localization in the form of a filamentous structure is

226 lost (Supplementary Fig. 7). Our results thus indicate that CypS forms polar plugs that are  
227 putative anchor sites for the LfiA/LfiB filament.

## 228 **CeaR is morphogenic and is localized to the cell envelope and the Z-ring**

229 Attempts to overexpress CeaR-His in *E. coli* for the *in vitro* polymerization assay were not  
230 successful, possibly due to the N-terminal transmembrane domains (TMDs; Supplementary  
231 Fig. 1). Removal of the CeaR N-terminal TMDs enabled overexpression in *E. coli*, but  
232 nonetheless no filamentous CeaR *in vitro* structures were observed. We note that genomes of  
233 unicellular cyanobacteria do not have a homologous gene to *ceaR* (Fig. 1a), and furthermore,  
234 unlike CypS, LfiA and LfiB, recombinant expression of CeaR-GFP in *Synechocystis* was  
235 unsuccessful. This suggests that CeaR function is specific to the multicellular cyanobacterial  
236 phenotype. Expression of a functional CeaR-GFP fusion protein (Supplementary Fig. 11b,d,e)  
237 from  $P_{ceaR}$  and from  $P_{petE}$  in *Anabaena* WT showed that the protein localized to the cell  
238 periphery in a patchy pattern (Fig. 1h, Supplementary Fig. 8a), yet it also accumulated at the  
239 septa or had localization at the Z-ring. Z-ring or septal localization was found in 25% of cells  
240 (589 out of 2301 counted cells) carrying  $P_{petE}::ceaR-gfp$  and in 17% of cells (206 out of 1237  
241 counted cells) carrying  $P_{ceaR}::ceaR-gfp$ . In addition, we observed that the expression of CeaR-  
242 GFP from  $P_{petE}$  led to a swollen cell phenotype in a large proportion of cells (1754 (76%) of  
243 2301 counted cells) and a similar proportion of swollen cells when CeaR-GFP was expressed  
244 from  $P_{ceaR}$  (789 (64%) of 1237 counted cells; Fig. 1h, Supplementary Fig. 8a). A similar swelling  
245 of cells was also identified in *Anabaena* WT cells expressing untagged CeaR from  $P_{ceaR}$  (435  
246 (32%) of 1346 counted cells; Supplementary Fig. 8a). Strikingly, expression of both, CeaR-  
247 GFP or untagged CeaR in the  $\Delta ceaR$  mutant strain did not induce cell swelling (Supplementary  
248 Figs. 8a and 9a). The localization pattern of CeaR indicates that CeaR is associated with the  
249 FtsZ-driven divisome. In agreement with our suggestion, CeaR-GFP localization to the Z-ring  
250 was lost upon deletion of the N-terminal TMDs from CeaR (Supplementary Fig. 8a). This  
251 indicates that membrane anchorage is key for proper CeaR function and localization.



## 252 ***Anabaena* CCRP deletion strains show defects in filament shape and viability**

253 To further study the function of the four CCRPs, we generated  $\Delta cypS$ ,  $\Delta ceaR$  and a double  
254  $\Delta lfiA\Delta lfiB$  mutant strain and examined their phenotype. Notably, single  $\Delta lfiA$  or  $\Delta lfiB$  mutant  
255 strains could not be generated, suggesting that the presence of only one of those proteins is  
256 lethal for *Anabaena*. Our results show that the  $\Delta cypS$  and  $\Delta lfiA\Delta lfiB$  mutant strains were  
257 characterized by altered filament and cell shape phenotypes and reduced filament viability (Fig  
258 2a, Supplementary Fig. 10a,b). Unlike the linear filament growth pattern of the *Anabaena* WT,  
259 both  $\Delta cypS$  and  $\Delta lfiA\Delta lfiB$  mutant strains showed filaments with a zigzagged pattern (Fig. 2a,  
260 Supplementary Fig. 9d). Additionally,  $\Delta cypS$  and  $\Delta lfiA\Delta lfiB$  cells were significantly larger and  
261 more rounded in comparison to the WT, reminiscent of  $\Delta mreB$  mutant<sup>39</sup> (Fig. 2c). The defect  
262 phenotype of the  $\Delta cypS$  and  $\Delta lfiA\Delta lfiB$  mutant strains could be complemented with pRL25C  
263 carrying  $P_{cypS}::cypS$  or  $P_{lfiA/lfiB}::lfiA-lfiB$ , respectively (Supplementary Fig. 9a,b). We also  
264 observed a slight decrease in cell volume in older  $\Delta ceaR$  mutant cultures that also exhibited a  
265 shortened filament length phenotype (Fig. 2c, Supplementary Figs. 9d and 11c). This is in  
266 accordance with our observation of cell volume increase upon CeaR-GFP overexpression in  
267 *Anabaena* WT (Figs. 1h, Supplementary Fig. 8a). Our results thus show that CeaR expression  
268 level influences *Anabaena* cell shape and suggest a role of CeaR in PG biogenesis and cell-  
269 shape determination.

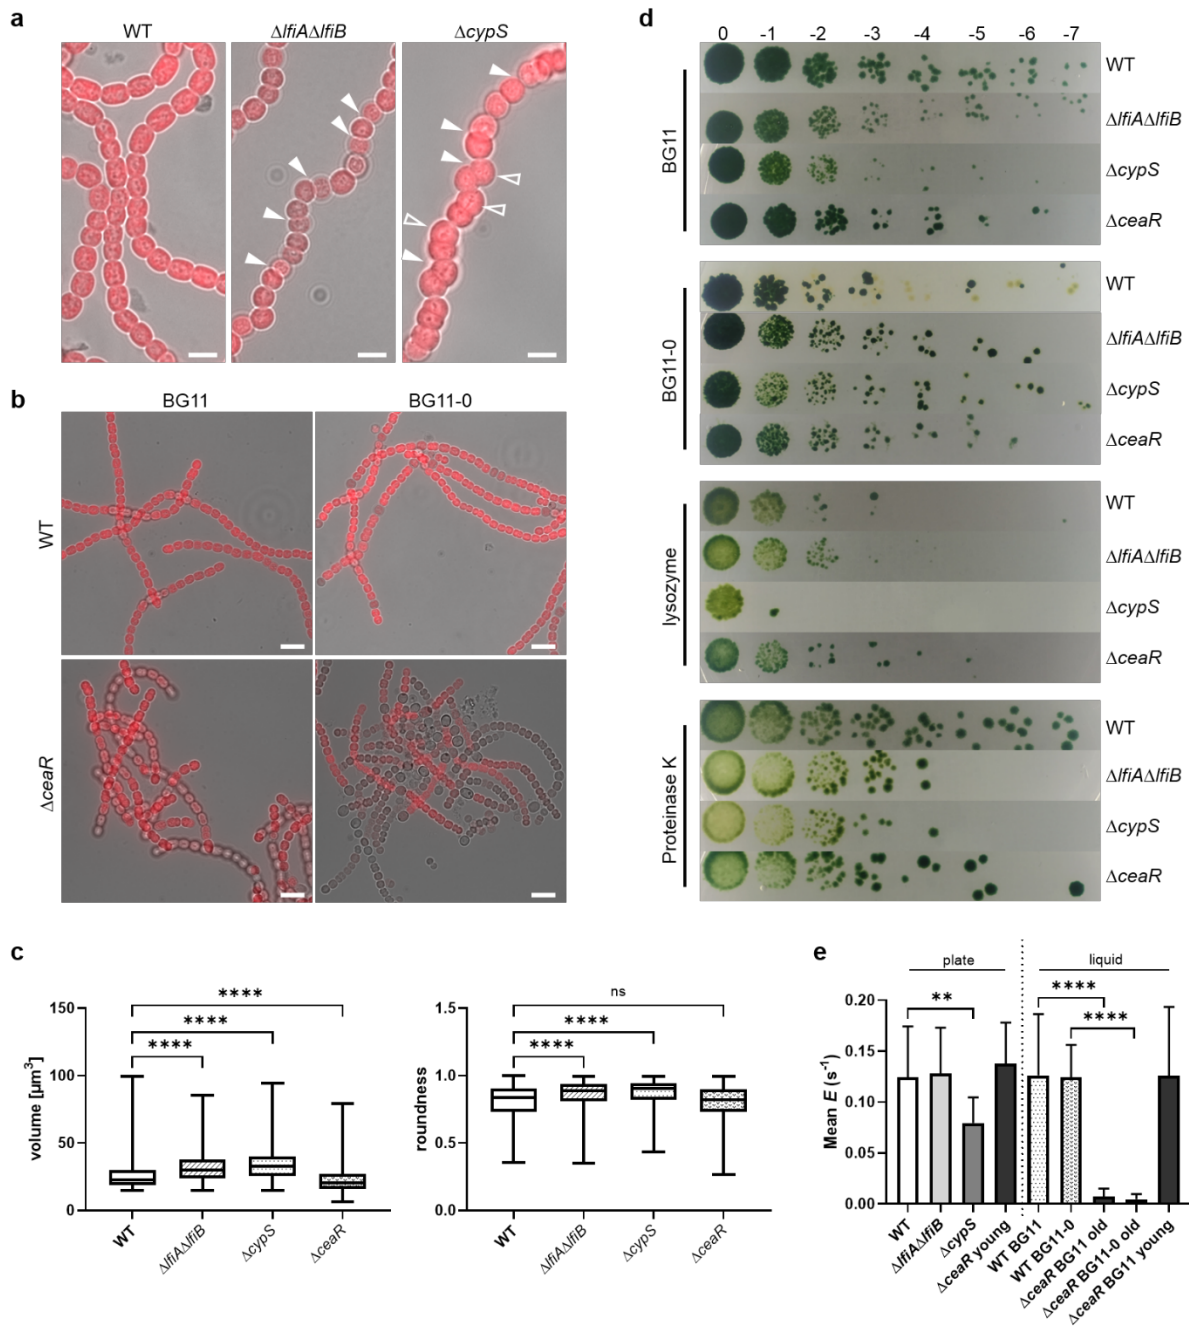

270

271 **Fig. 2: *Anabaena* CCRP mutant strains reveal altered filament and cell shape phenotypes**

272 (a-b) Merged chlorophyll autofluorescence and bright field micrographs of (a) *Anabaena* WT,  $\Delta lfiA\Delta lfiB$  and  $\Delta cypS$   
 273 mutant strains grown on BG11 plates and (b) *Anabaena* WT and  $\Delta ceaR$  mutant strain grown in BG11 and 5 d after  
 274 transfer into BG11<sub>0</sub>. Similar to what was observed upon transfer into BG11<sub>0</sub>, reduced  $\Delta ceaR$  filament length was  
 275 also observed during prolonged cultivation on BG11 plates (Supplementary Figs. 9d and 11c). Unlike in the WT,  
 276 we commonly observed bright red fluorescent filaments in the  $\Delta ceaR$  mutant (Fig. 3d, Supplementary Fig. 9e).  
 277 Ultrastructures revealed that those structures do not consist of thylakoid membranes (Supplementary Fig. 15),  
 278 leaving the nature of those filaments unknown. White triangles indicate zigzagged growth and translucent triangles  
 279 show swollen cells. Scale bars: (a) 5  $\mu m$  and (b) 10  $\mu m$ . (c) Cell roundness and volume of *Anabaena* WT,  $\Delta lfiA\Delta lfiB$ ,  
 280  $\Delta cypS$  and  $\Delta ceaR$  mutant strains grown on BG11 plates measured with Fiji imaging software. *Anabaena* WT: n =  
 281 537;  $\Delta ceaR$ : n = 796;  $\Delta lfiA\Delta lfiB$ : n = 404;  $\Delta ceaR$ : n = 369. (d) *Anabaena* WT,  $\Delta lfiA\Delta lfiB$ ,  $\Delta cypS$  and  $\Delta ceaR$  mutant  
 282 strains were spotted onto BG11, BG11<sub>0</sub> or BG11 plates supplemented with lysozyme or Proteinase K in triplicates  
 283 of serial dilutions of factor 10 and grown until no further colonies arose in the highest dilution (n = 2). (e) Mean  
 284 exchange coefficients ( $E$ ) of fluorescence recovery after photobleaching (FRAP) experiments from calcein-labelled  
 285 *Anabaena* WT and CCRP mutant strains. Liquid *Anabaena* WT and  $\Delta ceaR$  cultures were grown in BG11 and

286 partially transferred to BG11<sub>0</sub> 1 d prior labelling. Plate grown *Anabaena* WT,  $\Delta lfiA\Delta lfiB$  and  $\Delta cypS$  mutant strains  
287 were grown on BG11 plates. Data present the number of recordings of bleached cells (n). *Anabaena* WT BG11  
288 plate: n = 21; *Anabaena* WT liquid BG11: n = 10; *Anabaena* WT liquid BG11<sub>0</sub>: n = 11;  $\Delta cypS$ : n = 23;  $\Delta lfiA\Delta lfiB$ : n =  
289 17;  $\Delta ceaR$  liquid BG11: n = 16;  $\Delta ceaR$  liquid BG11<sub>0</sub>: n = 6. Representative FRAP micrographs are shown in  
290 Supplementary Fig. 12. Representative fluorescence recovery curves are shown in Supplementary Fig. 13. Values  
291 indicated with \* are significantly different from the WT. \*: P < 0.05, \*\*: P < 0.01, \*\*\*: P < 0.001, \*\*\*\*: P < 0.0001. ns  
292 indicates no significant difference to the WT (using one-way ANOVA with Dunnett's multiple comparison test).

293         The round and swollen cell phenotypes of the  $\Delta cypS$  and  $\Delta lfiA\Delta lfiB$  mutant strains are  
294 indicative of an impairment in cell wall integrity and/or defects in PG biogenesis as well as an  
295 elevated sensitivity to turgor pressure<sup>41,42,64,65</sup>. Similarly, the resemblance of the phenotypes of  
296 CeaR with MreB raised the hypothesis that the four investigated CCRPs could be involved in  
297 cell wall integrity or the PG biogenesis machinery. Consequently, we tested the sensitivity of  
298 the deletion strains to cell wall degrading enzymes and osmotic stressors. Our results show  
299 that the  $\Delta cypS$  mutant had elevated sensitivity to lysozyme, and both, the  $\Delta cypS$  and  $\Delta lfiA\Delta lfiB$   
300 mutant strains, were slightly more sensitive to Proteinase K compared to the WT (Fig 2d).  
301 These results suggest that both mutants have a defect in cell wall integrity. An increased  
302 sensitivity to lysozyme has been previously been associated with a defect in elongasome  
303 function<sup>39</sup>, suggesting that CypS could be associated with the *Anabaena* elongasome.  
304 Furthermore,  $\Delta cypS$  and  $\Delta lfiA\Delta lfiB$  mutants were unable to grow in liquid culture  
305 (Supplementary Fig. 10a) with  $\Delta cypS$  mutant cells readily bursting upon transfer to liquid  
306 culture (Supplementary Fig. 10b), hinting for an elevated sensitivity to fluid shear stress or  
307 turgor pressure. In contrast, the  $\Delta ceaR$  mutant was unaffected by the presence of cell wall  
308 stressors (Fig. 2d) and grew well in BG11 growth medium (Fig. 2b). However, upon nitrogen  
309 stepdown (i.e., transfer into BG11<sub>0</sub>), the  $\Delta ceaR$  mutant strain readily fragmented into shorter  
310 filaments that aggregated into large-scale cell clumps (Fig. 2b, Supplementary Figs. 10a and  
311 11d,e). Cells in those clumps also gradually lost their chlorophyll auto-fluorescence signal (an  
312 indicator for a decreased viability) and ultimately died within a few days (Fig 2b, Supplementary  
313 Fig. 11a,b,d). This shows that filament viability in the  $\Delta ceaR$  mutant is impaired under  
314 diazotrophic conditions. The defect in filament viability could be complemented with pRL25C  
315 carrying P<sub>ceaR</sub>::*ceaR* or P<sub>ceaR</sub>::*ceaR-gfp* (Supplementary Fig. 11b,d,e).

316 Previous studies showed that mutants of genes involved in intercellular communication  
317 in *Anabaena* show a similar, albeit more pronounced fragmentation phenotype (producing  
318 unicellular forms) when transferred from BG11 to BG11<sub>0</sub> due to the loss of diazotrophy<sup>46,48–50</sup>.  
319 Proper nutrient exchange through septal junctions is essential for *Anabaena* viability,  
320 especially under diazotrophic growth<sup>37</sup>. Consequently, we investigated the level of intercellular  
321 communication using FRAP experiments of calcein stained *Anabaena* CCRP mutant strains.  
322 Our results show that the  $\Delta lfiA\Delta lfiB$  mutant is not impaired in intercellular solute diffusion while  
323 diffusion is reduced in the  $\Delta cypS$  mutant and virtually absent in the  $\Delta ceaR$  mutant grown in  
324 liquid medium (Fig. 2e, Supplementary Figs. 12 and 13). Notably, solute diffusion was not  
325 decreased in young  $\Delta ceaR$  mutant cells (i.e. cultures up to 10 days; Fig. 2e), indicating the  
326 effect of *ceaR* knockout on cell-cell communication depends on the culture age. This culture  
327 age effect on cell-cell communication is also reflected by the different  $\Delta ceaR$  mutant filament  
328 length in younger and older (i.e. 3-4 weeks old) cultures. While young  $\Delta ceaR$  mutant filaments  
329 showed normal filament lengths, filaments from older  $\Delta ceaR$  mutant cultures were shortened  
330 (Supplementary Figs. 9d,e and 11c). To further investigate the underlying cause for the  
331 impaired cell-cell communication, we isolated sacculi and observed that the  $\Delta ceaR$  and the  
332  $\Delta cypS$  mutant partially contained significantly larger septa with decreased nanopore counts  
333 compared to the WT. We suggest that the larger septa may be responsible for the decrease in  
334 solute diffusion (Supplementary Fig. 14). In addition, we observed that some nanopores in the  
335  $\Delta ceaR$  mutant strain were large and irregular (Supplementary Fig. 14), which as well could  
336 contribute to the decreased efficiency in solute diffusion.

### 337 ***Anabaena* CCRPs are involved in MreB function and localization**

338 The swollen cell phenotype of *Anabaena*  $\Delta mreB$  mutant strain has been previously reported  
339 to have no effect on intracellular structures<sup>39</sup>. To assess whether the altered cell and filament  
340 shape of *Anabaena* CCRP mutant strains has any effect on intracellular arrangements, we  
341 compared ultrathin sections of *Anabaena* WT and CCRP mutant strains. Except for  $\Delta ceaR$   
342 mutant cells that contain a red fluorescent filament (Fig. 3d; Supplementary Figs. 9e and 15),

343 intercellular ultrastructures of the mutant strains were largely unaffected regardless of their  
344 impact on filament viability and shape (Supplementary Fig. 15). The red fluorescent filaments  
345 are not assemblies of thylakoid membranes but appear to be void entities, whose nature is yet  
346 to be identified. However, the observed cell wall defects and altered cell shape phenotypes  
347 indicates that CypS, LfiA/LfiB and CeaR function is related to PG biogenesis, possibly through  
348 association with FtsZ or MreB. To test for a link with the FtsZ-driven divisome, we visualized  
349 Z-ring placement in *Anabaena* WT and in each of the mutant strains by immunofluorescence.  
350 No alterations in Z-ring placement were observed, indicating that Z-ring formation is unaffected  
351 in the mutant strains (Supplementary Fig. 16). To test for an association with the elongasome,  
352 we compared the MreB localization in cells ectopically expressing a functional GFP-MreB  
353 fusion<sup>39</sup> from  $P_{\text{petE}}$ . Notably, unlike in the previously reported  $P_{\text{petE}}::\text{GFP-MreBCD}$   
354 overexpression strain<sup>39</sup>, we never saw polar aggregate-like structures in our GFP-MreB-  
355 expressing strain (Fig. 3a). This suggests that the previously observed aggregations in the  
356 GFP-MreBCD strain<sup>39</sup> are specific to the *mre* operon overexpression rather than the  
357 overexpression of MreB only. In contrast, we observed short GFP-MreB filaments and  
358 occasionally GFP-MreB patches within the cells (Fig. 3a). When grown on BG11<sub>0</sub> plates, which  
359 we found to increase  $P_{\text{petE}}$ -driven expression levels, more pronounced GFP-MreB filaments  
360 were visible, readily spanning the whole cells (Supplementary Fig. 17). Expression of GFP-  
361 MreB in the mutant strains revealed considerable alterations of GFP-MreB localization (Fig  
362 3a). Even though GFP-MreB filaments were present in the  $\Delta\text{LfiA}\Delta\text{LfiB}$  mutant strain, we only  
363 detected those in non-rounded cells that seemingly had a WT-like phenotype (Fig 3b inlay; 245  
364 (24%) of 1040 cells counted), whereas in rounded cells of zigzagged filaments, the GFP-MreB  
365 signals were restricted to the cell poles (Fig. 3b; 795 (76%) of 1040 counted cells). These  
366 observations suggest that LfiA/LfiB are important for proper localization of MreB. Unlike  
367 LfiA/LfiB, CypS seems to have no direct influence on GFP-MreB localization, as indicated by  
368 the WT-like localization of GFP-MreB in the  $\Delta\text{cypS}$  mutant strain (Fig. 3c). In contrast, in the  
369  $\Delta\text{ceaR}$  mutant, GFP-MreB only localized as aggregate-like patches and never formed  
370 filamentous strings as seen in the WT (Fig. 3d). This suggests that CeaR is important for proper

371 MreB polymerization. The negative effect of the absence of CeaR on GFP-MreB function and  
372 localization became even more evident during growth in liquid culture. There, P<sub>petE</sub>-driven  
373 expression of GFP-MreB led to a prominent rounding of  $\Delta ceaR$  mutant cells and a zigzagged  
374 filament shape (Fig. 3d). Despite being expressed from the P<sub>petE</sub>, GFP-MreB signal intensity  
375 was strongly elevated in these cells, which suggests a role of CeaR in MreB turnover  
376 regulation. The induced cell rounding of the  $\Delta ceaR$  mutant upon GFP-MreB expression argues  
377 for a defect in proper MreB function as the rounded phenotype resembles the previously  
378 described  $\Delta mreB$  mutant phenotype<sup>39</sup>. Similarly, the swollen cell phenotype of *Anabaena* cells  
379 expressing CeaR-GFP (Fig. 1h, Supplementary Fig. 8a) is reminiscent of the enlarged cells  
380 observed upon GFP-MreBCD overexpression<sup>39</sup>. An association of CeaR with MreB is further  
381 reinforced by a banded and helical-like assembly of CeaR-GFP in *E. coli* (Supplementary Fig.  
382 8b), resembling the localization of YFP-MreB in *E. coli*<sup>66</sup>. Thus, our observations suggest that  
383 CeaR is involved in longitudinal PG synthesis by affecting MreB localization and function.



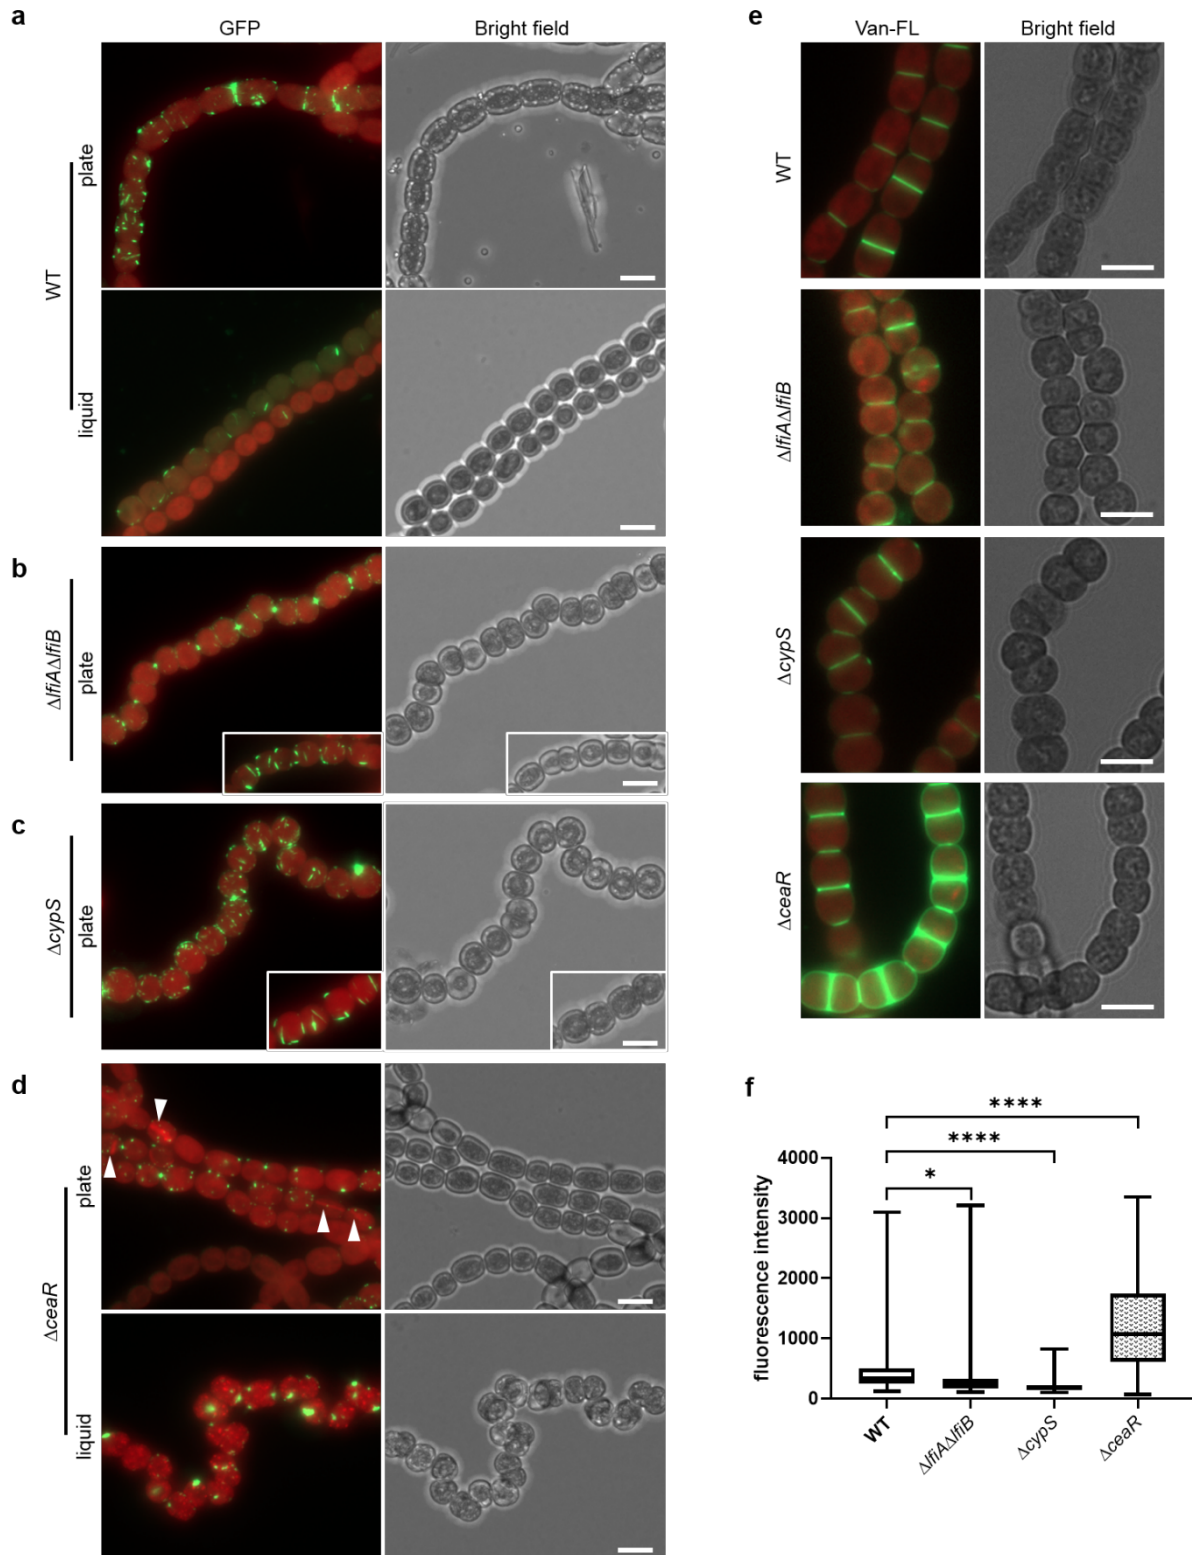

384

385 **Fig. 3: CCRPs affect MreB localization and PG biogenesis**

386 (a-d) Merged GFP fluorescence and chlorophyll autofluorescence and bright field micrographs of *Anabaena* WT,  
 387  $\Delta lfiA\Delta lfiB$ ,  $\Delta cypS$  and  $\Delta ceaR$  mutant strains expressing GFP-MreB from  $P_{petE}$ . Cells were either grown on BG11  
 388 plates or in BG11 liquid medium prior visualization. White triangles indicate red fluorescent filaments within  $\Delta ceaR$   
 389 mutant cells. Exposure time for GFP fluorescence excitation was 70 ms except for 14 ms in the  $\Delta ceaR$  mutant  
 390 grown in liquid BG11. Consequently, despite being expressed from the non-native  $P_{petE}$ , absence of CeaR  
 391 detrimentally affects GFP-MreB localization and turnover. (e) Merged BODIPY™ FL Vancomycin (Van-FL)  
 392 fluorescence and chlorophyll autofluorescence and bright field micrographs of *Anabaena* WT,  $\Delta lfiA\Delta lfiB$ ,  $\Delta cypS$  and

393 *ΔceaR* mutant strains stained with 5  $\mu\text{g ml}^{-1}$  Van-FL. As a result of the low Van-FL staining and for better visibility,  
394 Van-FL fluorescence intensity in *ΔlfiAΔlfiB* and *ΔcypS* mutants was artificially increased about twofold after image  
395 acquisition. Unlike in the WT and the other two mutants, *ΔceaR* mutant cells show longitudinal Van-FL staining,  
396 indicating an altered PG biogenesis activity or localization of enzymes involved in PG biogenesis. (f) Analysis of the  
397 arithmetic mean fluorescence intensities of cells from Fig. 3e. For all measurements, Van-FL fluorescence intensity  
398 from cell septa was recorded using 130 ms exposure time from an area of 3.52  $\mu\text{m}^2$ . Sample size (n) was 200  
399 stainings for each strain. Values indicated with \* are significantly different from the WT. \*: P < 0.05, \*\*: P < 0.01, \*\*\*:  
400 P < 0.001, \*\*\*\*: P < 0.0001. ns indicates no significant different to the WT (using one-way ANOVA with Dunnett's  
401 multiple comparison test). Scale bars: 5  $\mu\text{m}$ .

## 402 **PG biogenesis is altered in *Anabaena* CCRP mutants**

403 To further assess the function of *Anabaena* CCRPs in MreB and elongasome-driven PG  
404 turnover, we stained active sites of PG synthesis by fluorescently labeled vancomycin  
405 (Van-FL). This revealed alterations in the PG remodeling between WT and CCRP mutant  
406 strains (Fig. 3e,f). While *ΔlfiAΔlfiB* and *ΔcypS* mutants showed a similar Van-FL staining pattern  
407 compared to the WT, both mutants revealed a significantly reduced staining intensity (Fig 3e,f).  
408 Hence, it is likely that CypS and LfiA/LfiB are linked to PG biogenesis. Unlike the other two  
409 mutants, the *ΔceaR* mutant is characterized by an increased mean intensity of Van-FL staining  
410 that is observed not only in the septal wall, as in the WT, but also in the lateral cell wall (Fig.  
411 3e). Consequently, we suggest that CeaR acts as a regulator PG biogenesis and/or localization  
412 of the PG biogenesis machinery. This is in agreement with the altered expression and  
413 localization pattern of GFP-MreB in the *ΔceaR* mutant (Fig. 3d). The suggested role of the four  
414 CCRPs in PG turnover is furthermore in agreement with the observed swollen cell phenotype  
415 in the *ΔcypS* and *ΔlfiAΔlfiB* mutant and with the altered MreB localization in the mutant strains.  
416 Since we observed that CCRP mutants affect cell wall integrity, we next examined the  
417 heterocyst-development in the CCRP mutants. Heterocysts contain an extra cell envelope with  
418 specific heterocyst glycolipids and envelope polysaccharides<sup>37</sup>. Therefore, we cultivated the  
419 CCRP mutant strains on BG11<sub>0</sub> plates and inspected heterocyst-formation and staining pattern  
420 with alcian blue, a dye that specifically binds to the heterocysts polysaccharide sheet. Our  
421 results so far did not reveal an observable defect in heterocyst-development in any of the  
422 mutants (Supplementary Fig. 18).



423 ***Anabaena* CCRPs have the capacity to form an interconnected network and interact with**  
424 **SepJ and MreB**

425 As our *Anabaena* CCRP mutant strains displayed similar phenotypes and the four *Anabaena*  
426 CCRPs were all linked to MreB function and localization as well PG biogenesis, we next  
427 investigated whether the four proteins interact with each other and with other known  
428 morphological determinants in *Anabaena*. Using bacterial two hybrid assays, we found that all  
429 of our four CCRPs were able to self-interact (Fig 4a). Additionally, all four CCRPs could cross-  
430 interact with each other (Fig. 4a) and we found that LfiA, LfiB and CeaR but not CypS,  
431 interacted with MreB. Additionally, CeaR weakly interacts with FtsZ (Fig. 4a, Supplementary  
432 Fig. 18), which is in agreement with the Z-ring-like *in vivo* localization of CeaR-GFP (Fig. 1h,  
433 Supplementary Fig. 8a). Furthermore, all proteins were identified as interaction partners of the  
434 septal protein SepJ, but not with FraC and FraD (Fig. 4a, Supplementary Fig. 19), two other  
435 septal junction proteins<sup>45</sup>. Since coiled-coil motifs are well-known protein-protein interaction  
436 domains<sup>67-69</sup>, they are putatively prone for false-positive results in the interaction assays.  
437 Indeed, interactions of coiled-coil containing proteins are usually considered to be specific<sup>67,70-</sup>  
438 <sup>76</sup>; nonetheless, we further tested the interaction specificity of our four CCRPs – Cyps, LfiA,  
439 LfiB and CeaR – in the bacterial two-hybrid assay by including Alr3364, another *Anabaena*  
440 CCRP (Supplementary Fig. 1), as a negative control in our screening. Our results show that  
441 Alr3364 only weakly interacted (< 500 Miller Units/mg LacZ) with LfiA and LfiB and failed to  
442 interact with CypS and CeaR (Supplementary Fig. 20). This confirms that the strong  
443 interactions (all > 500 Miller Units/mg LacZ) observed between CypS, LfiA, LfiB and CeaR are  
444 indeed specific interactions. We attempted to further confirm our interaction results with affinity  
445 co-elution experiments. However, we found that Ni-NTA-bound *Anabaena* CCRPs readily  
446 precipitated upon transfer from denaturing to native buffer conditions, precluding further co-  
447 elution studies. Additionally, we observed that non-denaturing conditions failed to purify  
448 overexpressed CCRPs from *E. coli*, confirming their inherent insoluble nature, a property  
449 known to eukaryotic IFs<sup>54,77</sup>. Instead, we surveyed for further interaction partners in *Anabaena*  
450 WT cells expressing CeaR-GFP or LfiA-GFP by co-immunoprecipitation experiments

451 (Supplementary Fig. 21) and analyzed co-precipitated proteins by LC-MS/MS analytics  
452 (Supplementary File 3). This analysis confirmed that LfiA and LfiB interact with each other *in*  
453 *vivo* and validated the association of CeaR and LfiA with MreB in *Anabaena* (Supplementary  
454 Fig. 21c). Corroborating a role of CeaR in PG biogenesis and MreB function, CeaR was also  
455 found to be associated with three penicillin binding proteins (Supplementary Fig. 21c), which  
456 are known regulators of PG synthesis and are part of the elongasome<sup>78,79</sup>. Furthermore, both,  
457 CeaR and LfiA, co-precipitated ParA, and CeaR was additionally found to be associated with  
458 MinD (Supplementary Fig. 21c). Both ParA and MinD belong to a protein family of Walker-A-  
459 type ATPases and mediate plasmid and chromosome segregation<sup>77,80,81</sup>. To test for a similar  
460 function in our CCRPs, we compared the DNA distribution among the CCRP mutant cells as  
461 measured by distribution of 4',6-Diamidin-2-phenylindol (DAPI) staining intensity. For that, we  
462 calculated the width of the DAPI focal area as the range of DAPI staining around the maximum  
463 intensity focus ( $\pm 10$  grey intensity in arbitrary units). This revealed that the staining focal area  
464 size was significantly different among the four tested strains ( $P=3.14 \times 10^{-41}$ , using Kruskal-  
465 wallis). Post-hoc comparison showed that the focal area size in the  $\Delta ceaR$  mutant was larger  
466 than the others, and the area size in *Anabaena* WT was not significantly different than  $\Delta cypS$ .  
467 The DAPI signal observed in the  $\Delta lfiA \Delta lfiB$  mutant appears as the most condensed, and  
468 indeed, the  $\Delta lfiA \Delta lfiB$  mutant focal DAPI area was smallest in comparison to the other strains  
469 ( $\alpha=0.05$ , using Tukey test; Supplementary Fig. 22ab). Unlike the  $\Delta ceaR$  mutant and the  
470 WT, DAPI signals in the  $\Delta lfiA \Delta lfiB$  and  $\Delta cypS$  mutant strains were also observed between two  
471 neighboring cells (Supplementary Fig 21a), indicating that DNA distribution is not properly  
472 executed during cell division in those strains.

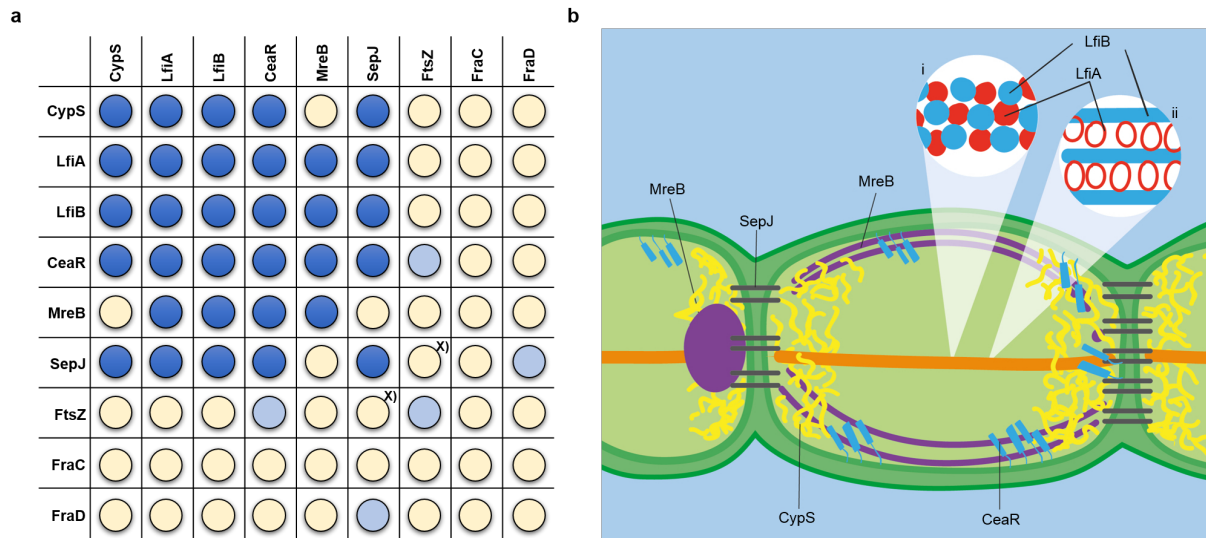

473

474 **Fig. 4: *Anabaena* CCRPs form a putative cytoskeletal network that links the septal junction protein SepJ**  
 475 **and the MreB cytoskeleton**

476 (a) Graphical visualization of beta-galactosidase assay results of *E. coli* BTH101 cells co-expressing indicated  
 477 translational fusion constructs of *Anabaena* proteins with the T18 and T25 subunit, investigating all possible pair-  
 478 wise combinations. Corresponding data are shown in Supplementary Fig. 19. Blue spots indicate strong verified  
 479 interactions (>500 Miller units mg<sup>-1</sup>) while light blue dots mark moderate interactions (< 500 Miller units mg<sup>-1</sup>) and  
 480 no interactions are depicted with yellow-colored dots. Dots marked with “X” were previously reported by Ramos-  
 481 León *et al.* (2015)<sup>82</sup>. (b) A model for an interconnected cytoskeletal network in *Anabaena*. Septal junctions,  
 482 comprised of, among others, SepJ (grey), are directly connected to the CypS polar scaffold (yellow) that provides  
 483 anchoring sites for the LfiA/B filament (orange). (i) Similar to  $\alpha$ -tubulin and  $\beta$ -tubulin, the LfiA/B heteropolymer could  
 484 be composed of alternating LfiA (red) and LfiB (blue) monomers. (ii) However, based on *in vivo* localizations, *in vitro*  
 485 polymerization, domain predictions and structural similarities to eukaryotic plectin, it is more likely that LfiA acts as  
 486 a cytolinker protein for LfiB, enabling proper polymerization. The LfiA/B filament spans through the cells, anchoring  
 487 to CypS but never passes through the septal junctions. The identified *Anabaena* filament stabilizing effect of LfiA/B  
 488 could then be relayed to the neighboring cells via interactions with CypS, CeaR (light blue), SepJ and MreB (purple).  
 489 MreB localization is adapted from Hu *et al.* (2007)<sup>39</sup> in which MreB plugs accumulate at the septa (indicated in the  
 490 dividing cell on the left) but also forms cell-traversing filaments (right cell). MreB activity and localization is  
 491 dependent on CeaR. Furthermore, according to FRAP results, it is conceivable that CeaR regulates *Anabaena*  
 492 filament viability through interaction with SepJ.

## 493 Discussion

494 Here we provide evidence for the capacity of three *Anabaena* CCRPs - CypS, LfiA together  
 495 with LfiB - to form IF-like polymers *in vitro* and *in vivo*. The characterization of multiple CCRPs  
 496 in our study was possible thanks to the easy to use and comparably high-throughput approach  
 497 for the screening of novel filament-forming CCRPs using the NHS-Fluorescein dye. Our  
 498 approach supplies an alternative for the examination of protein-filament formation by electron  
 499 microscopy; instead it allows for a simplified protocol for the detection of protein filaments using  
 500 fluorescence microscopy. In accordance with previous studies of eukaryotic IF proteins<sup>83,84</sup>,  
 501 *Anabaena* CCRPs N-terminally tagged with a YFP-tag failed to produce a discernible

502 structures/fluorescence signal. This suggests that the N-terminus is essential for localization  
503 or function of the *Anabaena* CCRPs and supports our observations of CypS and LfiA/LfiB as  
504 *bona fide* prokaryotic CCRPs with IF-like function. While the previously described prokaryotic  
505 IF-like proteins form homopolymers<sup>15,24,32,52,85</sup>, LfiA and LfiB assemble into a heteropolymer  
506 comprising the two proteins. Furthermore, LfiA and LfiB have the capacity to co-polymerize in  
507 a heterologous *E. coli* system, similarly to other known CCRPs such as Scc from *Leptospira*  
508 *biflexa*<sup>85</sup> or crescentin<sup>86,87</sup>. We note, however, that the results from our *in vivo* experiments of  
509 LfiA/LfiB co-polymerization are based on artificial expression of the two CCRPs. We  
510 hypothesize that the absence of a LfiA/LfiB heteropolymer in strains expressing LfiA-GFP or  
511 LfiB-GFP alone (with the WT alleles still present) may be due to a dosage-dependent effect,  
512 where the presence of unequal concentration of LfiA and LfiB in the cell leads to protein  
513 aggregates. Our observation of LfiA-GFP or LfiB-GFP aggregates when they were expressed  
514 alone in the  $\Delta lfiA\Delta lfiB$  mutant strain supports the dosage effect hypothesis. Also, in our *in vitro*  
515 polymerization assay, LfiA and LfiB only formed clear filamentous structures when both  
516 proteins are present in equal concentrations. Furthermore, the genomic neighbourhood of LfiA  
517 and LfiB suggests that the LfiA/LfiB heteropolymer formation is relying on co-translational  
518 assembly (e.g., as observed for LuxA/LuxB<sup>88</sup>). Co-translational assembly of the WT LfiA/LfiB  
519 would lead to an efficient binding of the two subunits such that the expression of one unit only  
520 in excess (i.e., LfiA-GFP or LfiB-GFP) would lead to the formation of aggregates.

521 Our results demonstrate that the four CCRPs described here form an interconnected  
522 cytoskeletal network in *Anabaena*. The network is likely anchored to the cell poles through the  
523 interaction with the septal junction protein SepJ. Together with the cell shape-determining  
524 protein MreB<sup>89</sup>, *Anabaena* CCRPs possibly contribute to the cell shape and relay filament  
525 shape-stabilizing properties to neighboring cells, thereby maintaining the linear *Anabaena*  
526 filament phenotype (Fig. 4b). The interaction of *Anabaena* CCRPs with SepJ suggests that not  
527 only filament integrity<sup>46,48</sup> but also filament shape is strongly dependent on proper septal  
528 junction function and stability. Hence the four CCRPs are likely involved in filament integrity,  
529 similarly to the integral membrane proteins SepJ and FraC/FraD. The *Anabaena* CCRPs might

530 constitute stabilizing platforms or scaffolds for other proteinaceous structures, similarly to the  
531 stabilizing function of the eukaryotic cytoskeleton for cell-cell contacts (i.e. desmosomes)<sup>90</sup>.  
532 Notably, LfiA shares structural similarities with the spectrin repeats of plectin (Supplementary  
533 Table 1), a well-described eukaryotic cytolinker protein. Plectins link the three eukaryotic  
534 cytoskeletal systems (actin filaments, microtubules and IFs), thereby contributing to the  
535 resistance to deformation of vertebrate cells<sup>90,91</sup>. They furthermore stabilize desmosomes and  
536 are hence directly involved in cell-cell connection integrity<sup>92</sup>. An analogous cytolinker function  
537 of LfiA could explain why LfiB alone did not form filaments and suggests that LfiB requires LfiA  
538 as the linking protein for polymerization. Based on the structural similarity to spectrin, it is also  
539 conceivable that LfiA and LfiB possess similar functions as  $\alpha$  and  $\beta$ -spectrin. Together, spectrin  
540  $\alpha/\beta$ -heteropolymers produce a cell shape-maintaining interconnected cytoskeletal network (the  
541 so called spectre) below the plasma membrane of erythrocytes<sup>93</sup>. Furthermore, similar to  
542 LfiA/LfiB, spectrins are directly linked to the actin cytoskeleton<sup>90</sup>. This link of LfiA/LfiB to the  
543 actin-like MreB cytoskeleton is evident in the altered localization of GFP-MreB in the  $\Delta lfiA\Delta lfiB$   
544 mutant strain. The observed-PG staining pattern where PG staining was strongly elevated in  
545 the  $\Delta ceaR$  mutant strain suggests that in *Anabaena* WT, CeaR acts to (down)regulate MreB  
546 or elongasome function (hence its name: cyanobacterial elongasome regulator). Although less  
547 pronounced, PG staining was decreased in both  $\Delta cypS$  and  $\Delta lfiA\Delta lfiB$  mutants, suggesting  
548 that CypS and LfiA/LfiB could act as positive regulators of elongasome function. These  
549 observations further imply an association of CypS with the elongasome, despite the failure of  
550 CypS to directly interact with MreB (Fig. 4a). MreB and the elongasome are the main  
551 determinants of the PG exoskeleton, which provides the cell with structural integrity and  
552 resistance to turgor pressure<sup>79,94</sup>. Notably, both  $\Delta cypS$  and  $\Delta lfiA\Delta lfiB$  mutant strains were  
553 unable to grow in liquid culture, hinting for a defect in the resistance to turgor pressure. The  
554 growth defect in liquid culture of the  $\Delta cypS$  and  $\Delta lfiA\Delta lfiB$  mutant strains may result from  
555 altered elongasome functionality due to the absence of CypS and LfiA/LfiB. The association of  
556 *Anabaena* CCRPs with proper elongasome function is further supported by the elevated  
557 sensitivity of the  $\Delta cypS$  mutant strain to lysozyme, similar to the  $\Delta mreB$  mutant strain<sup>39</sup>. An

558 interaction of prokaryotic IF-like proteins with MreB and PG synthesis has been previously  
559 described in other bacteria. Examples are the gliding motility in *M. xanthus*, where a multi-  
560 protein complex, including the IF-like CCRP AglZ and MreB was found to coordinate type A-  
561 motility<sup>25</sup>. Similarly, the curved morphotype of *C. crescentus* is induced by crescentin, which  
562 modulates PG biogenesis by exerting local mechanical forces to the cell membrane<sup>22,56</sup>. Thus,  
563 our results are in agreement with a functional link between IF-like CCRPs and the MreB  
564 cytoskeleton in bacteria.

565         The conserved combination of all four CCRPs in heterocystous cyanobacteria that form  
566 linear filaments (or false branching; Fig. 1a) suggests that the linear filament formation has a  
567 selective advantage. Both  $\Delta cypS$  and  $\Delta lfiA\Delta lfiB$  mutants had a zigzagged phenotype and were  
568 unable to grow in liquid culture. The zigzagged mutants provide more accessible surface for  
569 the acting mechanical forces in liquid<sup>95</sup>, including fluid shear stress<sup>96</sup>, ultimately resulting in  
570 forces that cannot be endured by the abnormal mutant filaments. Notably, while the selective  
571 advantage of cell shape is considered to be mostly a manifestation of biotic and abiotic  
572 selective factors in the cell environment<sup>97</sup>, the selective advantage of multicellular shapes is  
573 likely related to the efficiency of intercellular communication and transport<sup>95</sup>. Indeed, the results  
574 of our FRAP experiments show that the efficiency of flow in the zigzagged  $\Delta cypS$  mutant  
575 filament is reduced. Furthermore, the  $\Delta ceaR$  mutant failed to grow in diazotrophic conditions  
576 where transport of metabolites in the filament is considered essential for *Anabaena* viability. A  
577 similar observation has been made for knockout mutant strains of SepJ, FraC and FraD that  
578 are essential for *Anabaena* multicellularity<sup>46,49,50</sup>. Additionally, the decrease in solute diffusion  
579 in the  $\Delta ceaR$  mutant strain suggests that CeaR is involved in the buildup or stabilization of the  
580 septal junctions. This notion is further supported by the abnormal nanopore formation observed  
581 in some  $\Delta ceaR$  mutant septa. Our results thus suggest that CeaR is important for *Anabaena*  
582 multicellularity while CypS, LfiA and LfiB serve as regulators of *Anabaena* patterned  
583 multicellularity. The evolution of patterned multicellularity is considered an important step  
584 towards a sustainable division of labor and the development of cell differentiation<sup>3</sup>. Our study



585 reveals the role of cytoskeletal proteins in the evolution and maintenance of bacterial  
586 multicellular form.

### 587 **Acknowledgments**

588 We thank Katrin Schumann, Myriam Barz, Lisa Stuckenschneider, Lisa-Marie Philipp and  
589 Claudia Menzel for their assistance in the experimental work. We thank Tanita Wein for critical  
590 comments on the manuscript. FRAP experiments were done at the Facility for Imaging by Light  
591 Microscopy (FILM) at Imperial College London. We thank Tine Pape for assistance with  
592 graphic illustrations (funded by the cluster of excellence “The Future Ocean” at Kiel  
593 University). The study was supported by the German science foundation (DFG) (Grant No.  
594 STU513/2-1 awarded to KS). DJN was supported by the BBSRC as part of the joint NSF Ideas  
595 Lab grant on ‘Nitrogen: improving on nature’ (grant BB/L011506/1). IM and AK were supported  
596 by German science foundation (DFG) (Grant SFB766).

### 597 **Author contribution**

598 BLS and KS designed the study. BLS established and performed the experimental work with  
599 contributions from MT and JW. CW and TD performed comparative genomics analysis. DJN  
600 and AKK performed FRAP assays and AKK and IM carried out ultrathin structures and  
601 nanopore analyses. AOH and AT analyzed protein samples by mass spectrometry. BLS, TD  
602 and KS drafted the manuscript with contributions from all coauthors.

### 603 **Competing interests**

604 The authors declare no competing interests.

605 **Supplementary information**

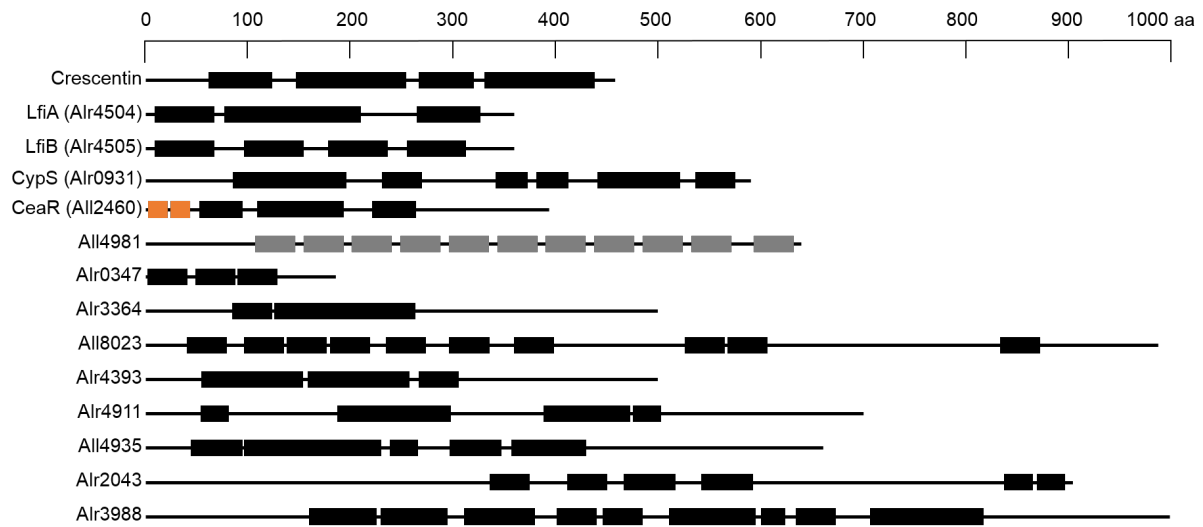

606

607 **Supplementary Fig. 1: Domain architecture of IF-like protein candidates**

608 Depiction of coiled-coil domains of protein candidates and Crescentin from *Caulobacter crescentus* based on the  
609 COILS algorithm<sup>98</sup> with a window width of 21. The scale on top is given in amino acid residues (aa) and amino acid  
610 sequences in coiled-coil conformation are depicted by black bars, transmembrane domains are shown in orange  
611 bars, while non-coiled-coil sequences are represented by black lines. Tetratricopeptide repeats (TRPs) are shown  
612 as grey bars. Cyanobacterial proteins are given as cyanobase locus tags.



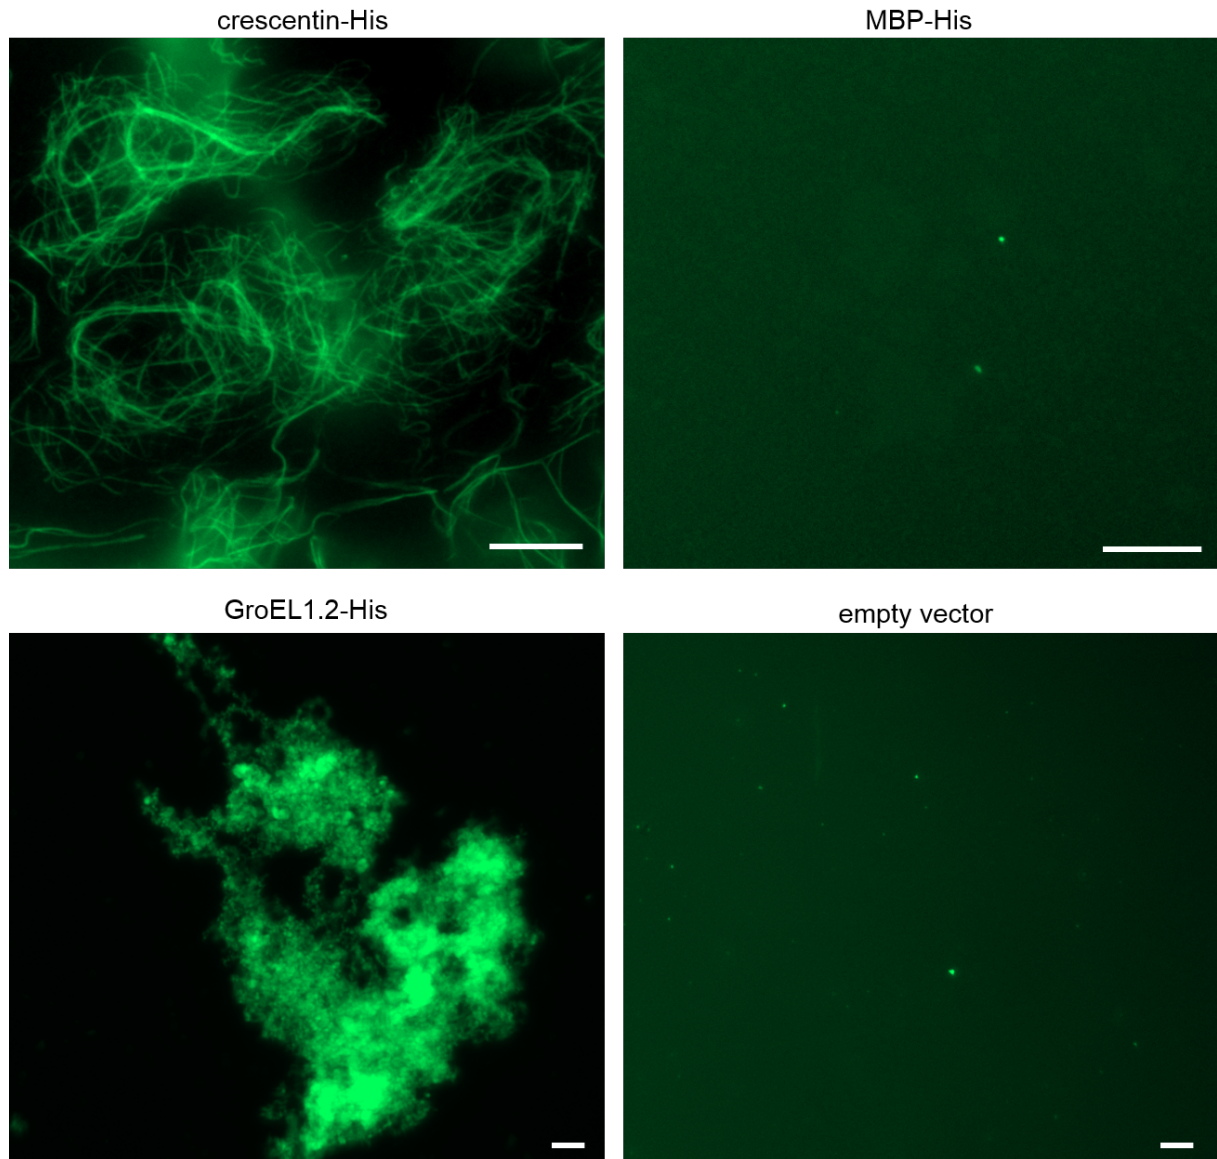

613

614 **Supplementary Fig. 2: *In vitro* polymerization assay controls**

615 NHS-fluorescein fluorescence micrographs of purified and renatured Crescentin-His, MBP-His and GroEL1.2 from  
616 *Chlorogloeopsis fritschii* PCC 6912 ( $0.5 \text{ mg ml}^{-1}$  each) as well as purified cell-free extracts of *E. coli* BL21 (DE3)  
617 carrying empty vector (pET21a(+)) in HLB. Notably, GroEL1.2, able to self-interact<sup>57</sup>, collapses into indistinct  
618 aggregates, showing that oligomerizing proteins do not form filaments in our assay. Proteins and cell-free extracts  
619 (empty vector) were dialyzed in a step-wise urea-decreasing manner and stained with an excess of NHS-  
620 Fluorescein. Scale bars:  $10 \mu\text{m}$ .

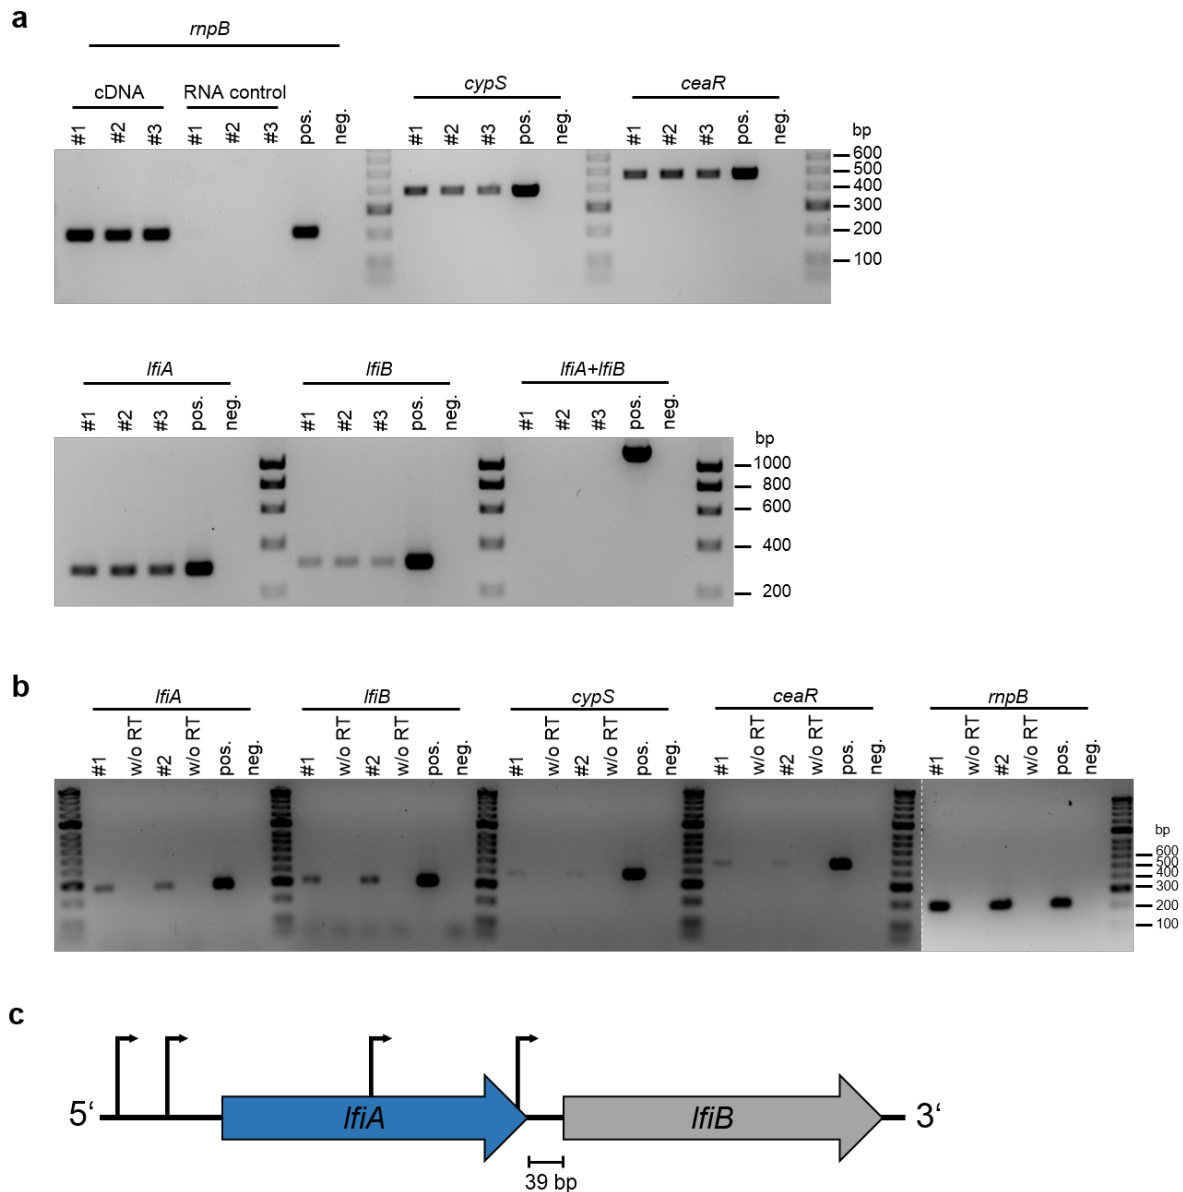

621

622 **Supplementary Fig. 3: *Anabaena* CCRPs are expressed at standard growth conditions**

623 (a,b) RT-PCR of whole RNA from *Anabaena* WT cultures grown in (a) BG11 or (b) BG11<sub>0</sub> liquid medium from (a)  
 624 three or (b) two independent biological replicates. Gene transcripts were verified using internal gene primers (*mpB*:  
 625 #1/#2; *cypS*: #3/#4; *ceaR*: #5/#6; *lfiA*: #7/#8; *lfiB*: #9/#10; *lfiA* and *lfiB*: #7/#10). As negative control (neg), PCR  
 626 reactions were performed with water instead of cDNA or RNA and as a positive control (pos) *Anabaena* gDNA was  
 627 included. PCR fragments were resolved on a 2% agarose gel in TAE buffer. For each RT-PCR reaction, 100 ng  
 628 cDNA was used. Absence of residual genomic DNA in DNase I-treated samples was verified with (a) 100 ng DNase  
 629 I-treated RNA (RNA control) or (b) 100 ng DNase I-treated RNA that was subjected to cDNA synthesis reaction  
 630 lacking reverse transcriptase (w/o RT). No common transcript for *lfiA* with *lfiB* was detected, suggesting that both  
 631 proteins are not encoded in an operon.

632 (c) Depiction of the genomic environment of *lfiA* (blue) and *lfiB* (grey) within the *Anabaena* genome and their  
 633 respective *in silico* predicted promoters depicted by black arrows (as predicted by BPROM<sup>61</sup>). Promoters of *lfiA* are  
 634 predicted to reside 204 bp and 543 bp upstream of the open reading frame (ORF) and promoters of *lfiB* are located  
 635 22 bp and 450 bp upstream of the ORF, thereby residing within the *lfiA* ORF.

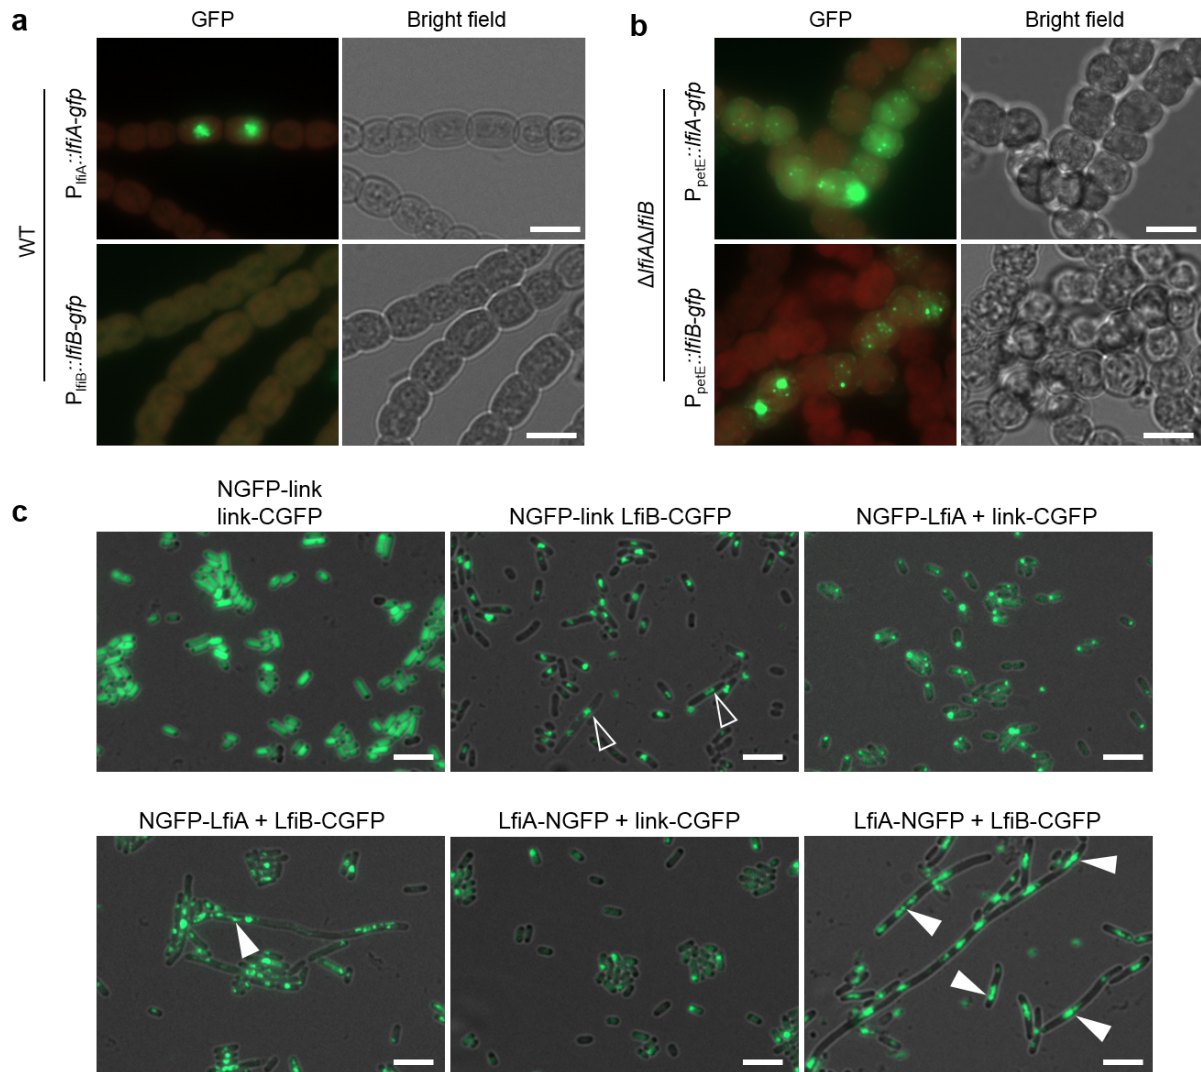

636

#### 637 **Supplementary Fig. 4: Heterologous expression of LfiA and LfiB**

638 (a) Merged GFP fluorescence and chlorophyll autofluorescence (red) and bright field micrographs of *Anabaena* WT  
 639 cells expressing LfiA-GFP or LfiB-GFP from  $P_{lfiA}$  and  $P_{lfiB}$ . No expression of LfiB-GFP is detectable from  $P_{lfiB}$  while  
 640 expression of LfiA-GFP from  $P_{lfiA}$  leads to similar patchy clumps within the cells as observed from  $P_{petE}$  in Fig. 1d.  
 641 Scale bars: 5  $\mu$ m.

642 (b) Merged GFP fluorescence and chlorophyll autofluorescence and bright field micrographs of  $\Delta lfiA \Delta lfiB$  mutant  
 643 strain expressing LfiA-GFP or LfiB-GFP from  $P_{petE}$ . Cells were grown on BG11 growth plates. For expression of  
 644 LfiA-GFP, BG11 plates were supplemented with 1  $\mu$ M  $CuSO_4$ . This experiment shows that LfiA-GFP and LfiB-GFP  
 645 from  $P_{petE}$  (Fig. 1d) expression and localization in *Anabaena* WT is not affected by native LfiA or LfiB present in the  
 646 WT background. Scale bars: 5  $\mu$ m.

647 (c) Detection of protein-protein interactions with the GFP-fragment reassembly assay<sup>99</sup>. Merged GFP fluorescence  
 648 and bright field micrographs of *E. coli* BL21(DE3) cells co-expressing NGFP-link (empty pET11a-link-NGFP) and  
 649 link-CGFP (empty pMRBAD-link-CGFP), NGFP-link and LfiB-CGFP, NGFP-LfiA and link-CGFP, NGFP-LfiA and  
 650 LfiB-CGFP, LfiA-NGFP and link-CGFP or LfiA-NGFP and LfiB-CGFP. Cells were grown to an  $OD_{600}$  of 0.5, induced  
 651 with 0.2% L-arabinose and 0.05 mM IPTG and incubated for 48 h at 20  $^{\circ}C$ . Transparent triangles point to structures  
 652 resembling LfiB-His *in vitro* polymers. White triangles indicate FilP-GFP-like<sup>32</sup> filamentous structures that resemble  
 653 structures indicated with translucent triangles but span longer distances. Co-expression of both, LfiA and LfiB leads  
 654 to an elongated cell phenotype. FilP-like structures and elongated cells can already be seen upon co-expression of  
 655 NGFP-LfiA with LfiB-CGFP but only upon co-expression of LfiA and LfiB with C-terminal GFP-fragments leads to a  
 656 clear filamentous cell phenotype and abundant intracellular filamentous structures. This suggests that the N-  
 657 terminus is important for heteropolymerization. Scale bars: 5  $\mu$ m.

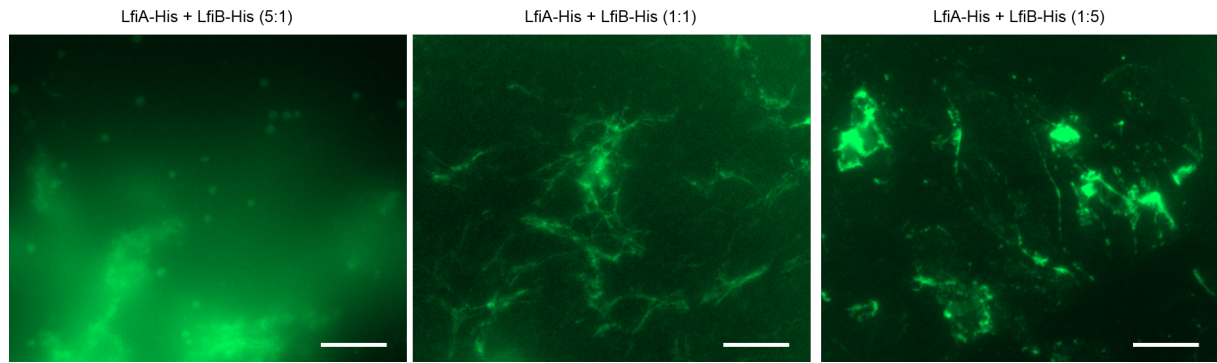

658

659 **Supplementary Fig. 5: Co-polymerization of LfiA and LfiB is dosage-dependent**

660 NHS-fluorescein micrographs of purified and co-renatured LfiA-His and LfiB-His in HLB. LfiA-His and LfiB-His were  
661 combined in different ratios, either with a fivefold excess of LfiA-His (left image; corresponding to  
662  $0.25 \text{ mg ml}^{-1}$  LfiA-His and  $0.05 \text{ mg ml}^{-1}$  LfiB-His), a fivefold excess of LfiB-His (right image; corresponding to  
663  $0.25 \text{ mg ml}^{-1}$  LfiB-His and  $0.05 \text{ mg ml}^{-1}$  LfiA-His) or an equal concentration of LfiA-His and LfiB-His (central image;  
664  $0.25 \text{ mg ml}^{-1}$  each). Proteins were dialyzed in a stepwise urea-decreasing manner and stained with an excess of  
665 NHS-Fluorescein. Fine heteropolymers only form when equal concentrations of LfiA-His and LfiB-His are present.  
666 In concert with the partial self-polymerization capacity of LfiB-His (Fig. 1b), certain filamentous structures are also  
667 detected in the LfiB-His excess samples. However, most protein still precipitated under those conditions.  
668 Scale bars:  $10 \mu\text{m}$ .



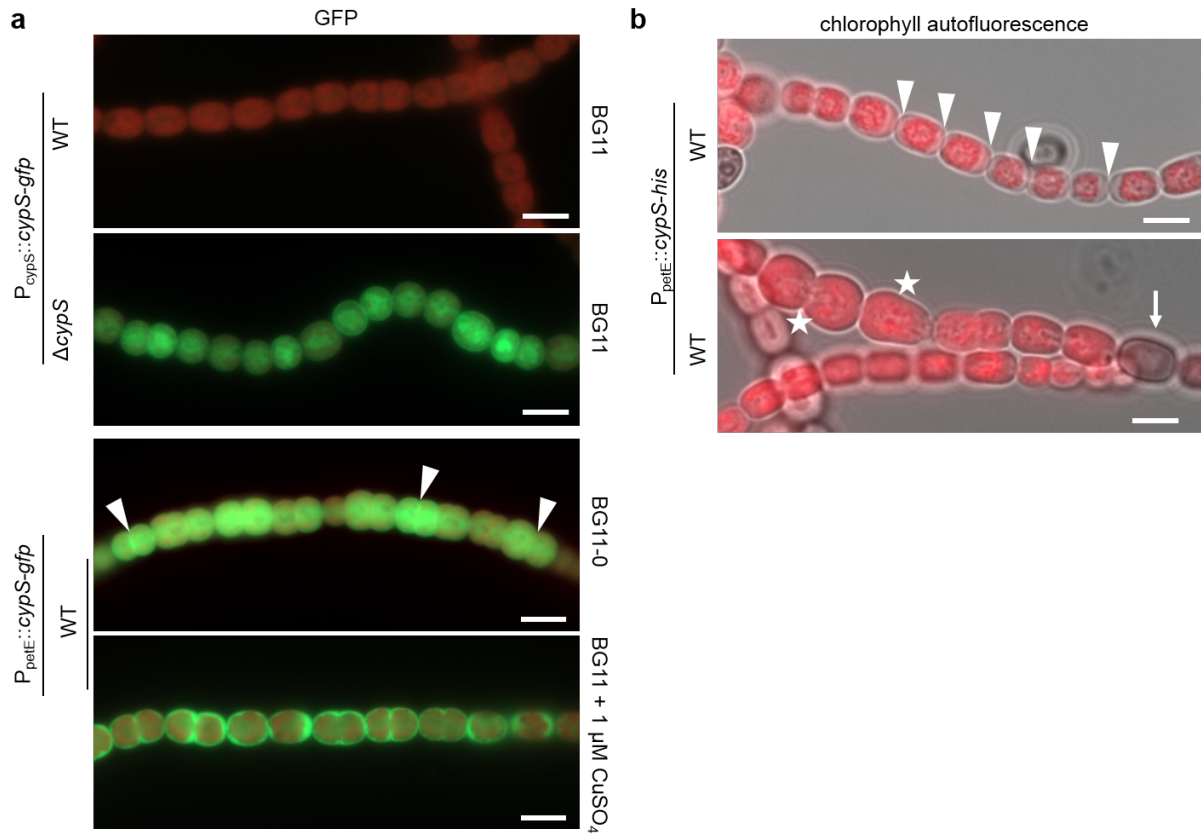

669

670 **Supplementary Fig. 6: CypS *in vivo* localization is tag orientation-dependent**

671 (a) Merged GFP fluorescence and chlorophyll autofluorescence micrographs of *Anabaena* WT and  $\Delta cypS$  mutant  
 672 strain expressing CypS-GFP from P<sub>petE</sub> or P<sub>cypS</sub>. Strains carrying P<sub>cypS</sub>::cypS-gfp were grown in BG11, while the  
 673 strains carrying P<sub>petE</sub>::cypS-gfp are grown in indicated media with or without CuSO<sub>4</sub> supplementation. White triangles  
 674 indicate membrane localization, which is most pronounced in dividing cells. Further induction of protein expression  
 675 shows polar localization of CypS-GFP, similar to CypS-His. In the presence of native *cypS* (i.e. *Anabaena* WT), no  
 676 CypS-GFP expression was detected from P<sub>cypS</sub>, indicating that CypS dosage is tightly controlled in the WT. Control  
 677 is likely exerted at the transcriptional level as overexpression from P<sub>petE</sub> still produces detectable protein in the WT  
 678 background. Scale bars: 5 μm.

679 (b) Merged bright field and chlorophyll autofluorescence micrographs of *Anabaena* WT cells expressing CypS-His  
 680 from P<sub>petE</sub> grown in BG11<sub>0</sub> supplemented with 0.25 μM CuSO<sub>4</sub> (upper image) or with 2.5 μM CuSO<sub>4</sub> for 2 d (lower  
 681 image). White triangles mark cell septa with the most prominent retraction of chlorophyll signal away from the poles.  
 682 White stars indicate swollen cells. White arrow points to a heterocyst. Note that the areas devoid of chlorophyll  
 683 signal are occupied by CypS-His plugs (Fig. 1g), suggesting that CypS forms a dense proteinaceous meshwork at  
 684 the cell poles. Scale bars: 5 μm.

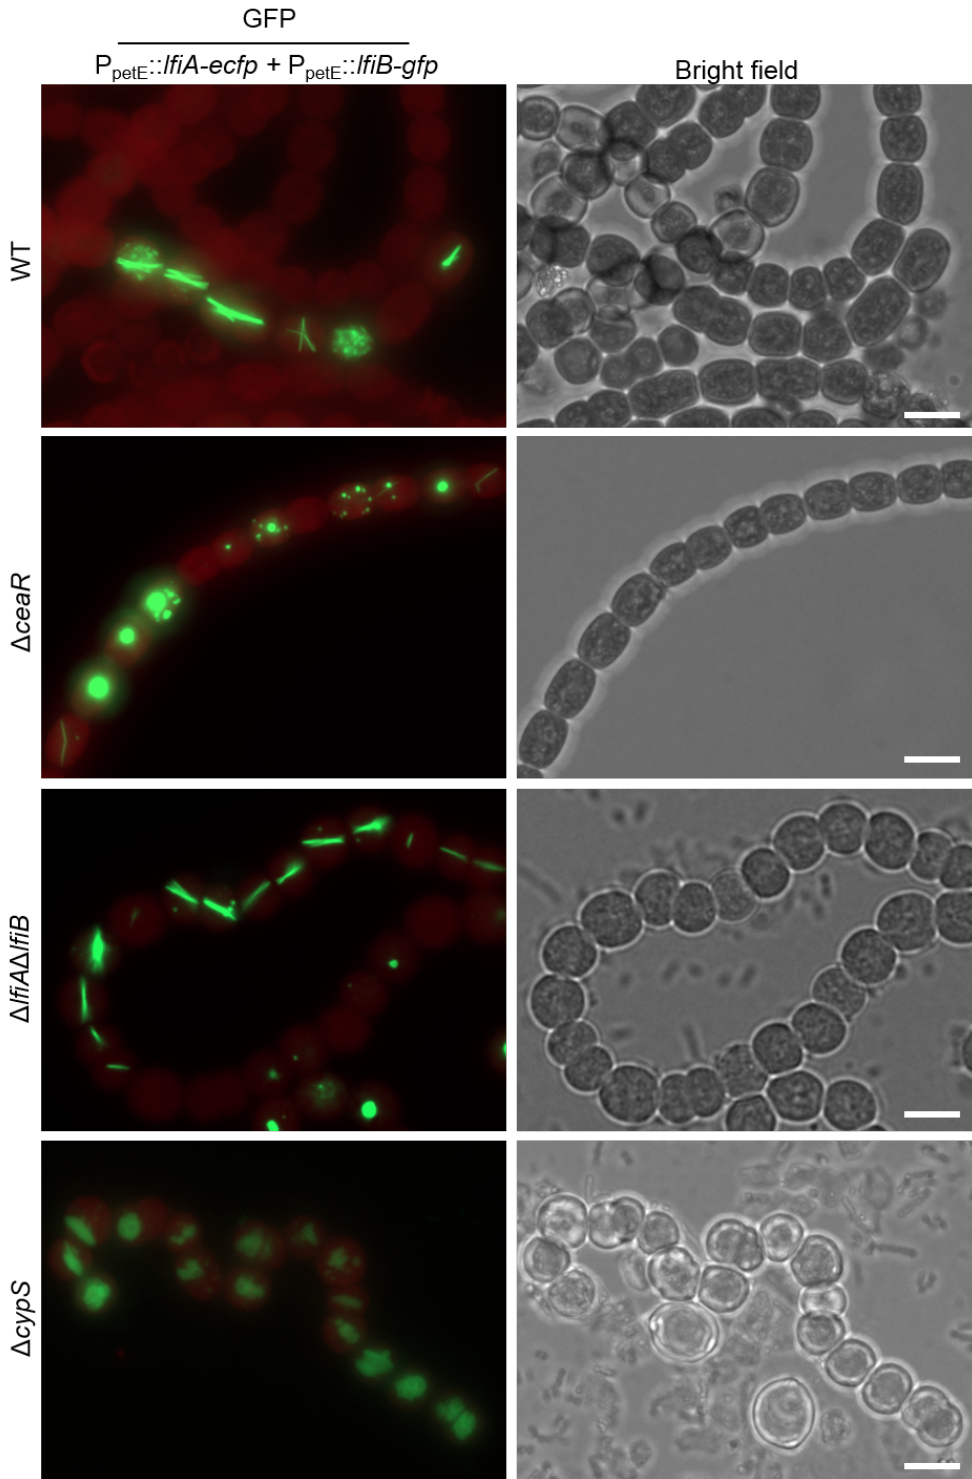

685

686 **Supplementary Fig. 7: *Anabaena* CCRPs affect LfiA/B *in vivo* localization**

687 Mergend GFP-fluorescence and chlorophyll autofluorescence and bright field micrographs of *Anabaena* WT and  
688 *Anabaena* mutant strains co-expressing LfiA-eCFP and LfiB-GFP from  $P_{petE}$ . First, second and fourth images are  
689 maximum intensity projections of a Z-stack. Localization of the LfiA/B filament is slightly altered in the  $\Delta ceaR$  mutant  
690 strain and fully deranged in the  $\Delta cypS$  mutant strain. This suggests that CypS is involved in LfiA/B polar attachment,  
691 possibly by providing a proteinaceous scaffold for LfiA/B anchorage. Also,  $\Delta cypS$  mutant strain expressing LfiA/B  
692 showed a decrease in filament viability. Colonies arose upon transformation with the LfiA/B-expressing construct  
693 but did not grow upon re-streaking on fresh plates. Lack of fluorescence signal in some of the depicted cells is likely  
694 due to the phenotypic variation of copy numbers of the pRL25C plasmid in different cells within an *Anabaena*  
695 filament<sup>100</sup>. Scale bars: 5  $\mu m$ .

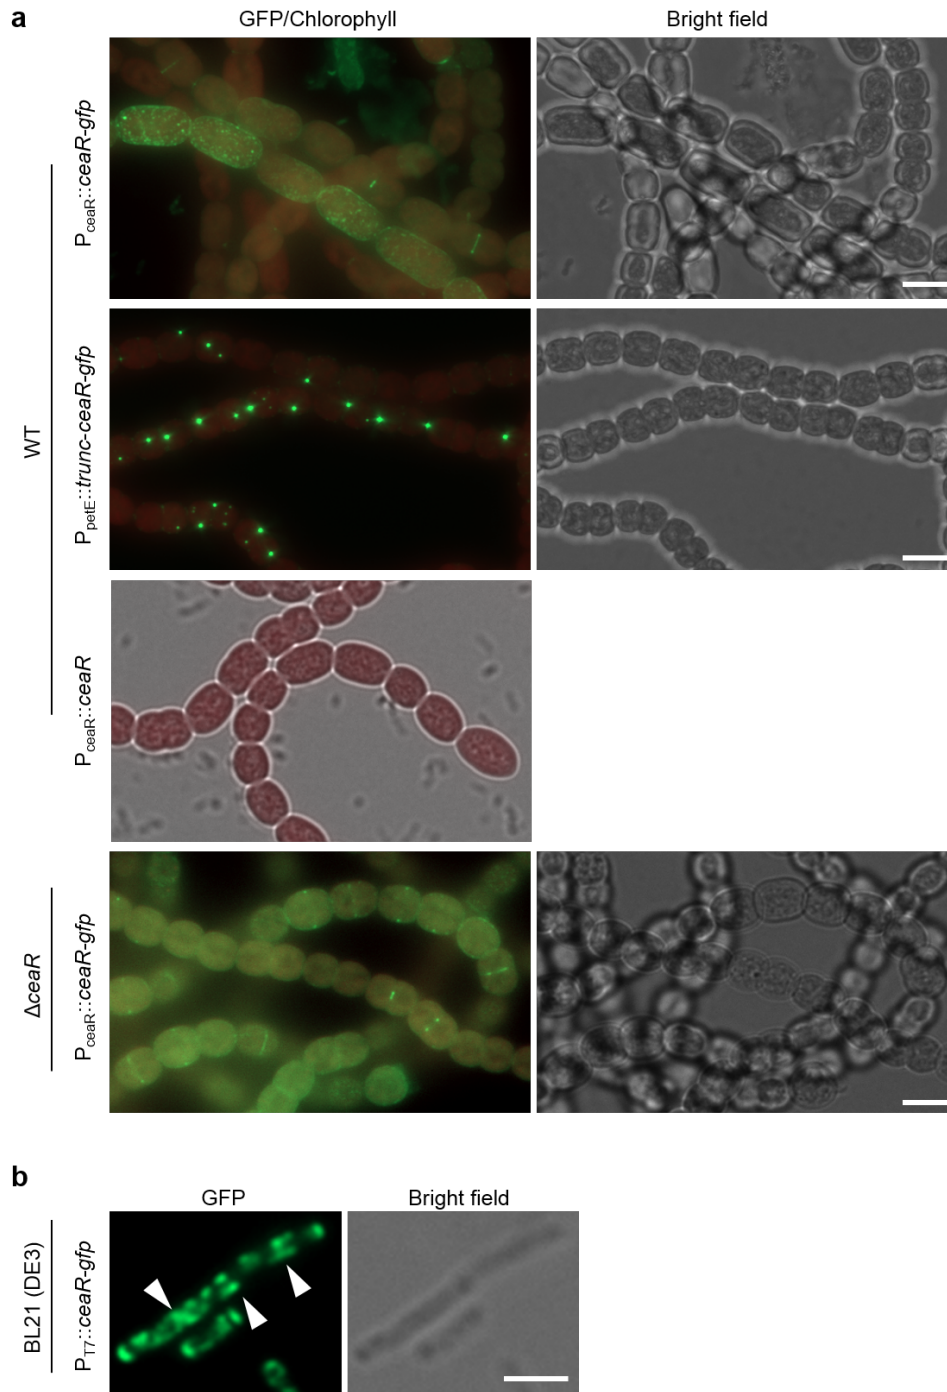

696

697 **Supplementary Fig. 8: *In vivo* localization of CeaR-GFP in *Anabaena* and *E. coli***

698 (a) Merged GFP-fluorescence and chlorophyll autofluorescence and bright field micrographs of *Anabaena* WT or  
 699  $\Delta ceaR$  mutant strain expressing CeaR-GFP, CeaR-GFP without the N-terminal transmembrane domain (first 52 aa  
 700 removed; *trunc-ceaR*) or CeaR from  $P_{petE}$  or  $P_{ceaR}$ . Additional expression of CeaR-GFP from  $P_{ceaR}$  or  $P_{petE}$  and CeaR  
 701 from  $P_{ceaR}$  induces a swollen cell phenotype. This phenomenon is not present upon expression of CeaR-GFP or  
 702 CeaR (Supplementary Fig. 9a) from  $P_{ceaR}$  in the  $\Delta ceaR$  mutant strain, indicating that *ceaR* expression or protein  
 703 level is tightly regulated in *Anabaena* WT. Expression of truncated CeaR-GFP in *Anabaena* WT cells was induced  
 704 for 1 d with 0.2  $\mu M$   $CuSO_4$ . Scale bars: 5  $\mu m$ .

705 (b) GFP-fluorescence and bright field micrographs of *E. coli* BL21 (DE3) cells expressing CeaR-GFP. Cells were  
 706 grown till an  $OD_{600}$  of 0.5 and induced for 48 h at 20 °C with 0.05 mM IPTG. White triangles indicate banded and  
 707 helical localization of CeaR-GFP. Scale bar: 5  $\mu m$ .



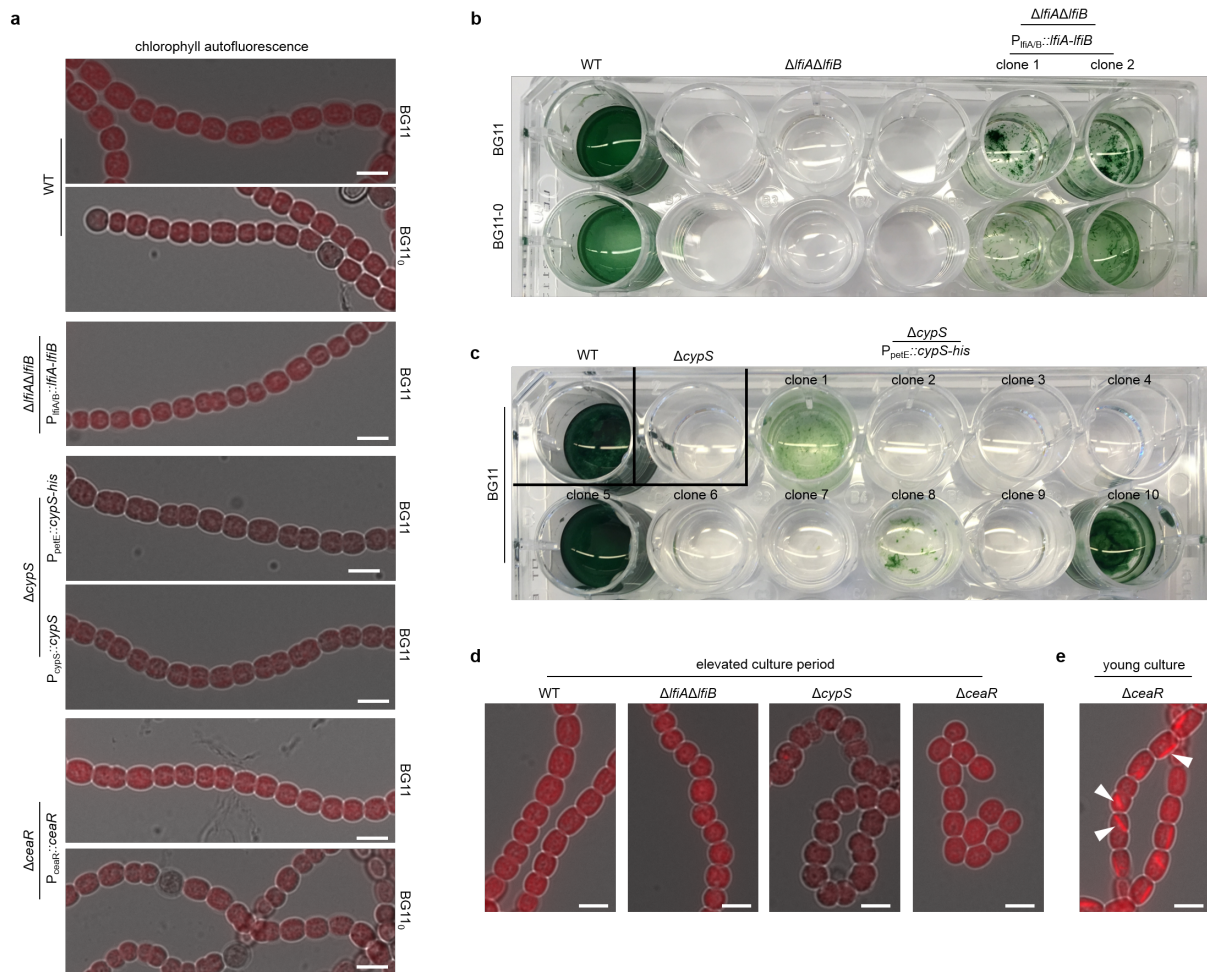

708

709 **Supplementary Fig. 9: Mutant phenotype complementation and culture age-dependency of *Anabaena***  
 710 **mutant phenotypes**

711 (a) Morphological complementation of *Anabaena* CCRP mutant strains as a result of native expression of *lfiA-lfiB*,  
 712 *cypS* and *ceaR* from pRL25C. Notably, CypS-His expressed from P<sub>petE</sub> also complemented the morphological defect  
 713 of the  $\Delta cypS$  mutant strain and rescues the linear *Anabaena* filament shape. The ability to complement the mutant  
 714 phenotypes using the pRL25C plasmid shows that pDU1-based plasmids can be successfully employed to rescue  
 715 WT phenotypes despite their variation in the relative copy number<sup>100</sup>. Scale bars: 5  $\mu$ m.

716 (b,c) Complementation of (b)  $\Delta lfiA\Delta lfiB$  and (c)  $\Delta cypS$  mutant strains by expressing *lfiA-lfiB* from P<sub>lfiA/B</sub> or *cypS-his*  
 717 from P<sub>petE</sub> from the replicative pRL25C plasmid. Note, not all tested clones successfully complemented the mutant  
 718 growth defects in liquid culture, likely due to the phenotypic variation caused by the copy number variation of  
 719 pRL25C<sup>100,101</sup>.

720 (d) Merged bright field and chlorophyll autofluorescence micrographs of (a) *Anabaena* WT and  $\Delta lfiA\Delta lfiB$ ,  $\Delta cypS$   
 721 and  $\Delta ceaR$  mutant strains grown on BG11 plates for an elevated time period (about 3 weeks) or (d)  $\Delta ceaR$  mutant  
 722 strain grown on BG11 plates for about one week. White triangles indicate red fluorescent filaments. Note: a  
 723 decreased viability of the  $\Delta cypS$  mutant strain is evident by a decreased chlorophyll autofluorescence signal. Scale  
 724 bars: 5  $\mu$ m.



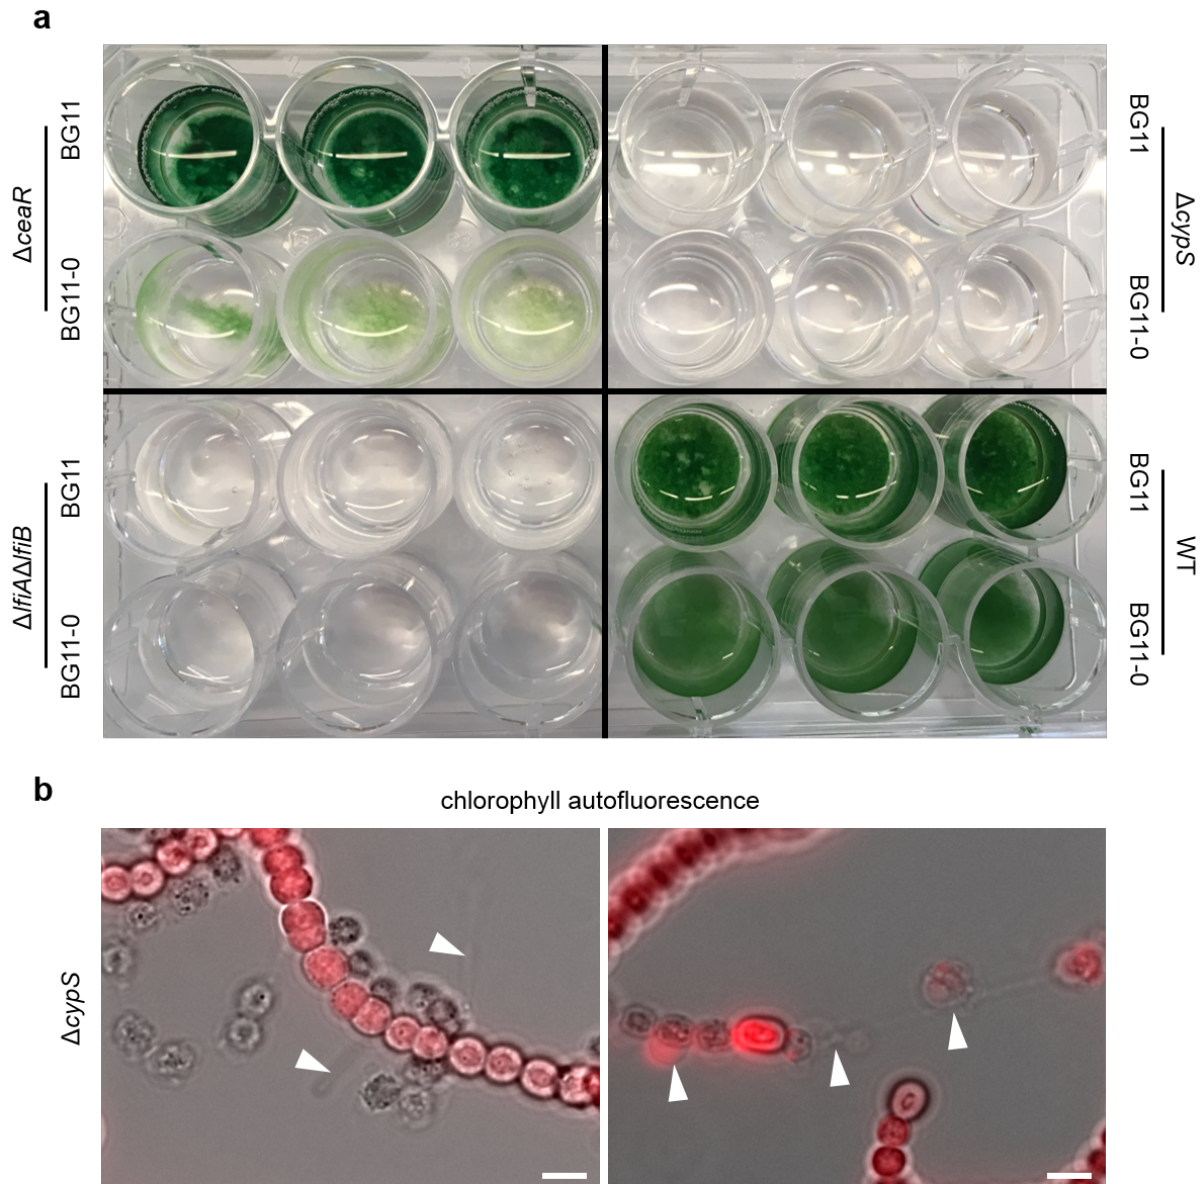

726 **Supplementary Fig. 10: *Anabaena* CCRP mutant strains show growth defects in liquid culture**

727 (a) *Anabaena* WT,  $\Delta cypS$ ,  $\Delta lfiA\Delta lfiB$  and  $\Delta ceaR$  mutant strains were grown on BG11 plates, transferred to liquid  
728 BG11 and BG11<sub>0</sub> medium and incubated for 12 d at standard growth conditions without shaking. The  $\Delta ceaR$  mutant  
729 strain can somewhat manage to survive in BG11<sub>0</sub> liquid medium without agitation. Nevertheless, prolonged  
730 incubation usually led to cell death. On the contrary,  $\Delta ceaR$  mutant cells are not viable when grown in liquid media  
731 with agitation.

732 (b) Merged bright field and chlorophyll autofluorescence micrographs of  $\Delta cypS$  mutant strain resuspended in BG11  
733 liquid medium from BG11 plates. Cells were visualized immediately after transfer. White triangles indicate material  
734 released from cells upon cell rupture. Scale bars: 5  $\mu$ m.

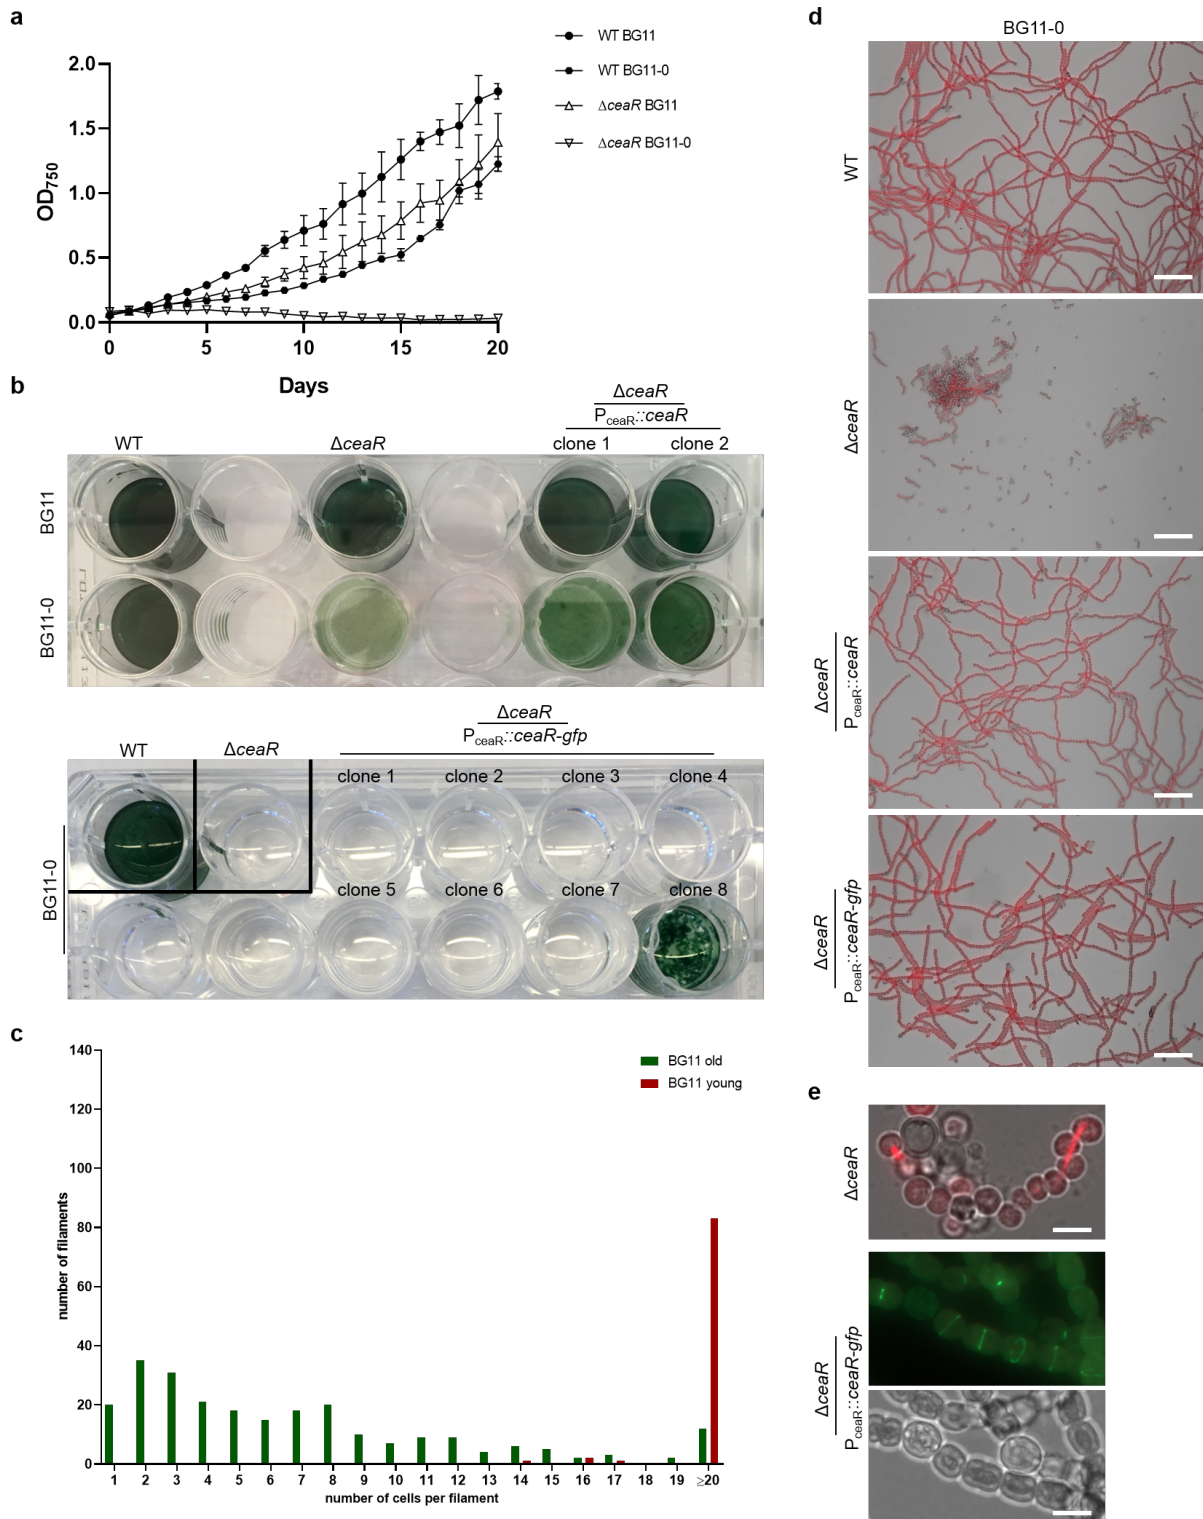

735

736 **Supplementary Fig. 11: Fragmentation and decreased viability of the  $\Delta ceaR$  mutant strain**

737 (a) *Anabaena* WT and  $\Delta ceaR$  mutant strain were grown in BG11, washed three times in BG11 or BG11<sub>0</sub>, adjusted  
 738 to an OD<sub>750</sub> of 0.1 and then grown in triplicates at standard growth conditions. OD<sub>750</sub> values were recorded once a  
 739 day for 20 d. Error bars show the standard deviation (n = 3).

740 (b) *Anabaena* WT grows in BG11 and BG11<sub>0</sub> while the  $\Delta ceaR$  mutant strain only grows in BG11. Growth in BG11<sub>0</sub>  
 741 can, however, be rescued using the pRL25C plasmid bearing P<sub>ceaR</sub>::*ceaR* or P<sub>ceaR</sub>::*ceaR-gfp*, showing that the  
 742 CeaR-GFP fusion protein is active.

- 743 (c) Filament length (number of cells per filament) of  $\Delta ceaR$  mutant strain from young and older cultures grown in  
744 BG11 liquid medium. Filament length of filaments with up to 19 cells were individually counted while filaments with  
745 with more than 20 cells are listed with  $\geq 20$ .
- 746 (d) Merged bright field and chlorophyll autofluorescence micrographs of *Anabaena* WT,  $\Delta ceaR$  mutant and the  
747  $\Delta ceaR$  mutant carrying a pRL25C plasmid bearing  $P_{ceaR}::ceaR$  or  $P_{ceaR}::ceaR-gfp$ . Micrographs show cells from  
748 Supplementary Fig. 11b 48 h after transfer to BG11<sub>0</sub>. The  $\Delta ceaR$  mutant fragments into short filaments that clump  
749 together with cells losing their chlorophyll auto-fluorescence signal. However, the  $\Delta ceaR$  mutant  
750 fragmentation/aggregation can be fully complemented with a pRL25C plasmid bearing  $P_{ceaR}::ceaR$  or  $P_{ceaR}::ceaR-$   
751 *gfp*.
- 752 (e) Micrographs of  $\Delta ceaR$  mutant and  $\Delta ceaR$  mutant expressing CeaR-GFP from  $P_{ceaR}$  on the pRL25C plasmid  
753 48 h after transfer to BG11<sub>0</sub>



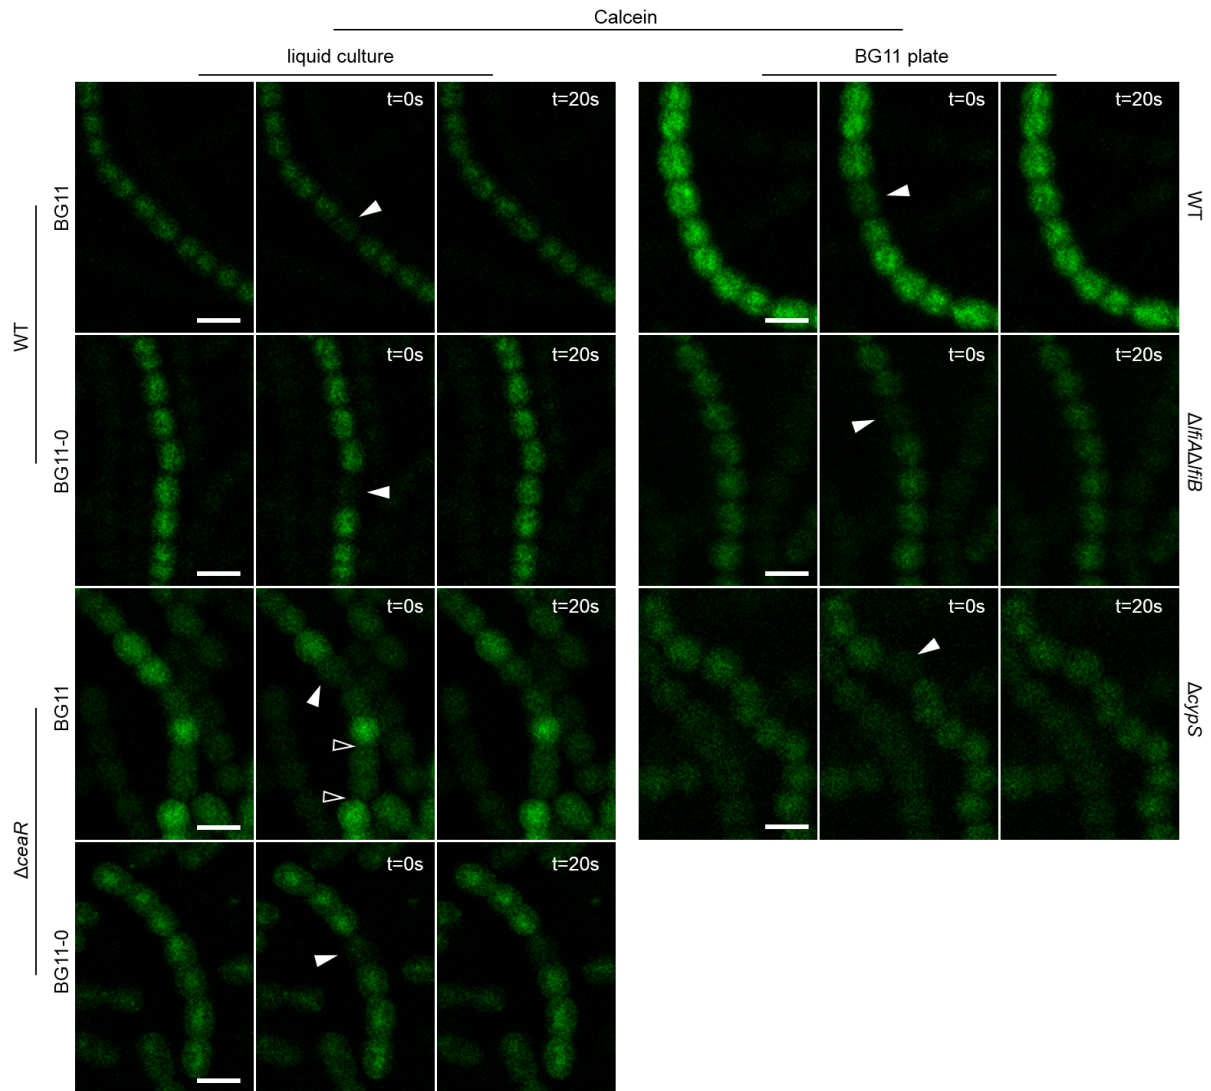

754

755 **Supplementary Fig. 12: *Anabaena* CCRP mutant strains display defects in cell-cell solute diffusion**

756 Representative calcein fluorescence micrographs depicting intercellular molecular exchange following laser-based  
757 bleaching of calcein fluorescence in *Anabaena* WT or  $\Delta ceaR$  mutant strain grown in liquid BG11 and liquid BG11<sub>0</sub>  
758 as well as in *Anabaena* WT and  $\Delta lfiA\Delta lfiB$  and  $\Delta cypS$  mutant strains grown on BG11 plates. White triangles indicate  
759 bleached cells. Translucent triangles show diffusion barriers present in the  $\Delta ceaR$  mutant strain. Fluorescence  
760 images show respective cells prior bleaching, immediately after bleaching (t = 0) and after 20 seconds after  
761 bleaching (t = 20s). Images show representative examples. Scale bars: 5  $\mu$ m.

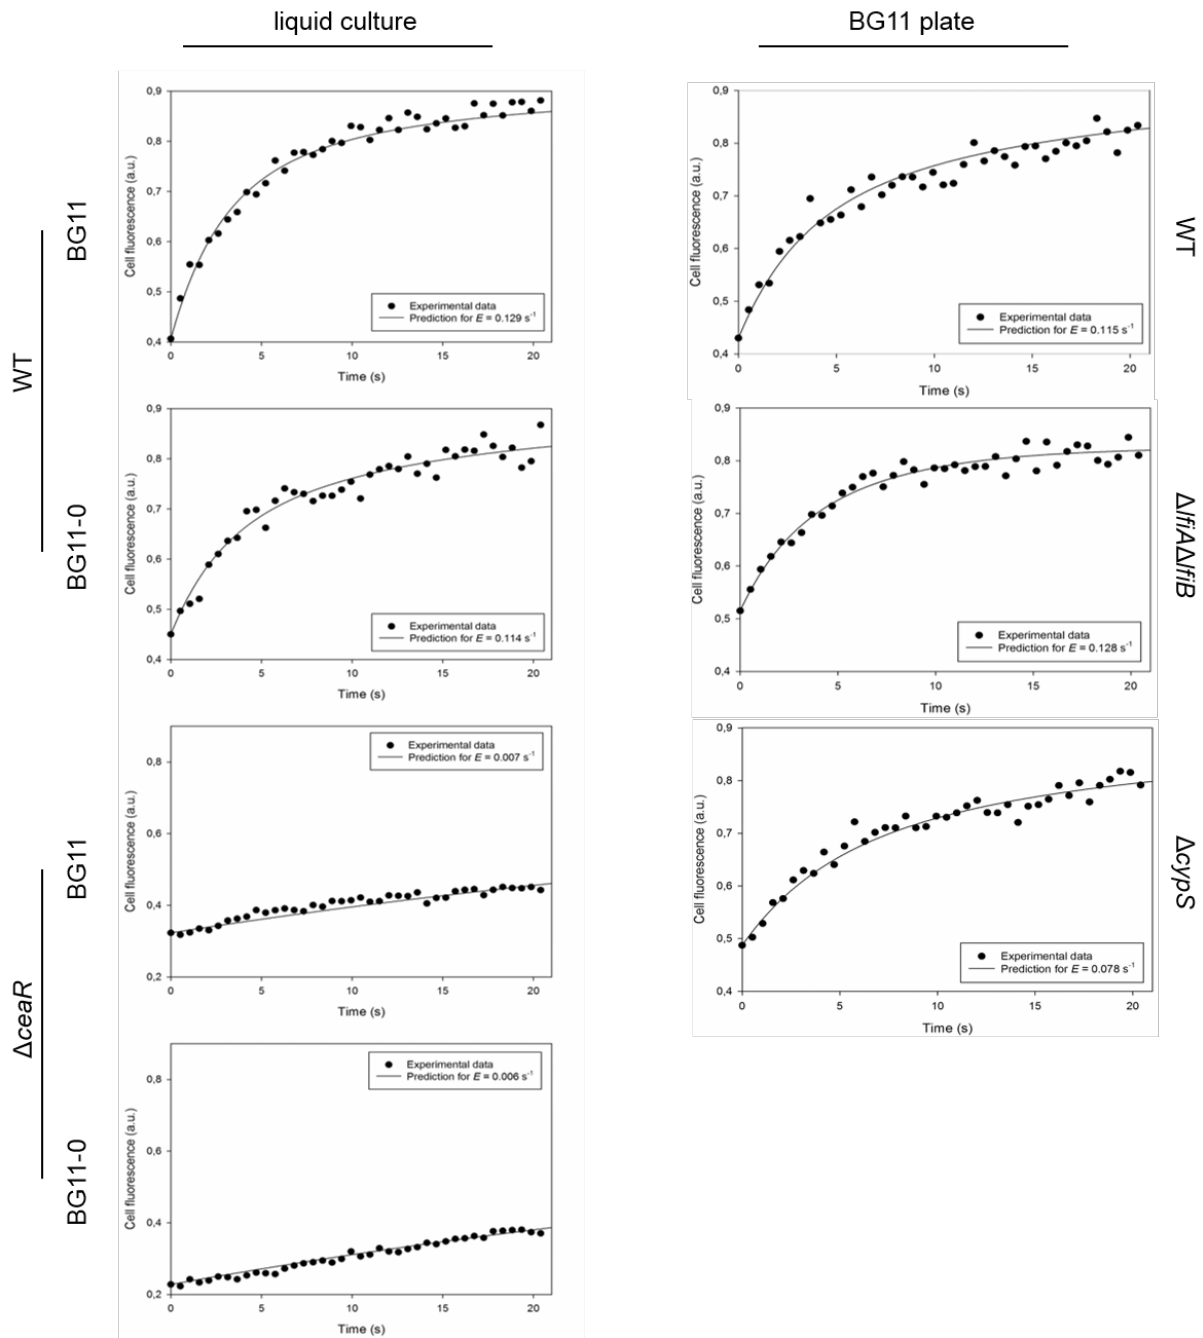

762

763 **Supplementary Fig. 13: Exchange coefficients of FRAP assays**

764 Fluorescence recovery curves with their predicted exchange coefficient values ( $E$ )<sup>43</sup> for selected bleached cells of  
 765 *Anabaena* WT or  $\Delta ceaR$  mutant strain grown in liquid BG11 and liquid BG11<sub>0</sub> as well as in *Anabaena* WT and  
 766  $\Delta lfiA\Delta lfiB$  and  $\Delta cypS$  mutant strains grown on BG11 plates. Fluorescence values are given in arbitrary units (a.u.)<sup>43</sup>  
 767 over a time course of 20 s post bleaching.

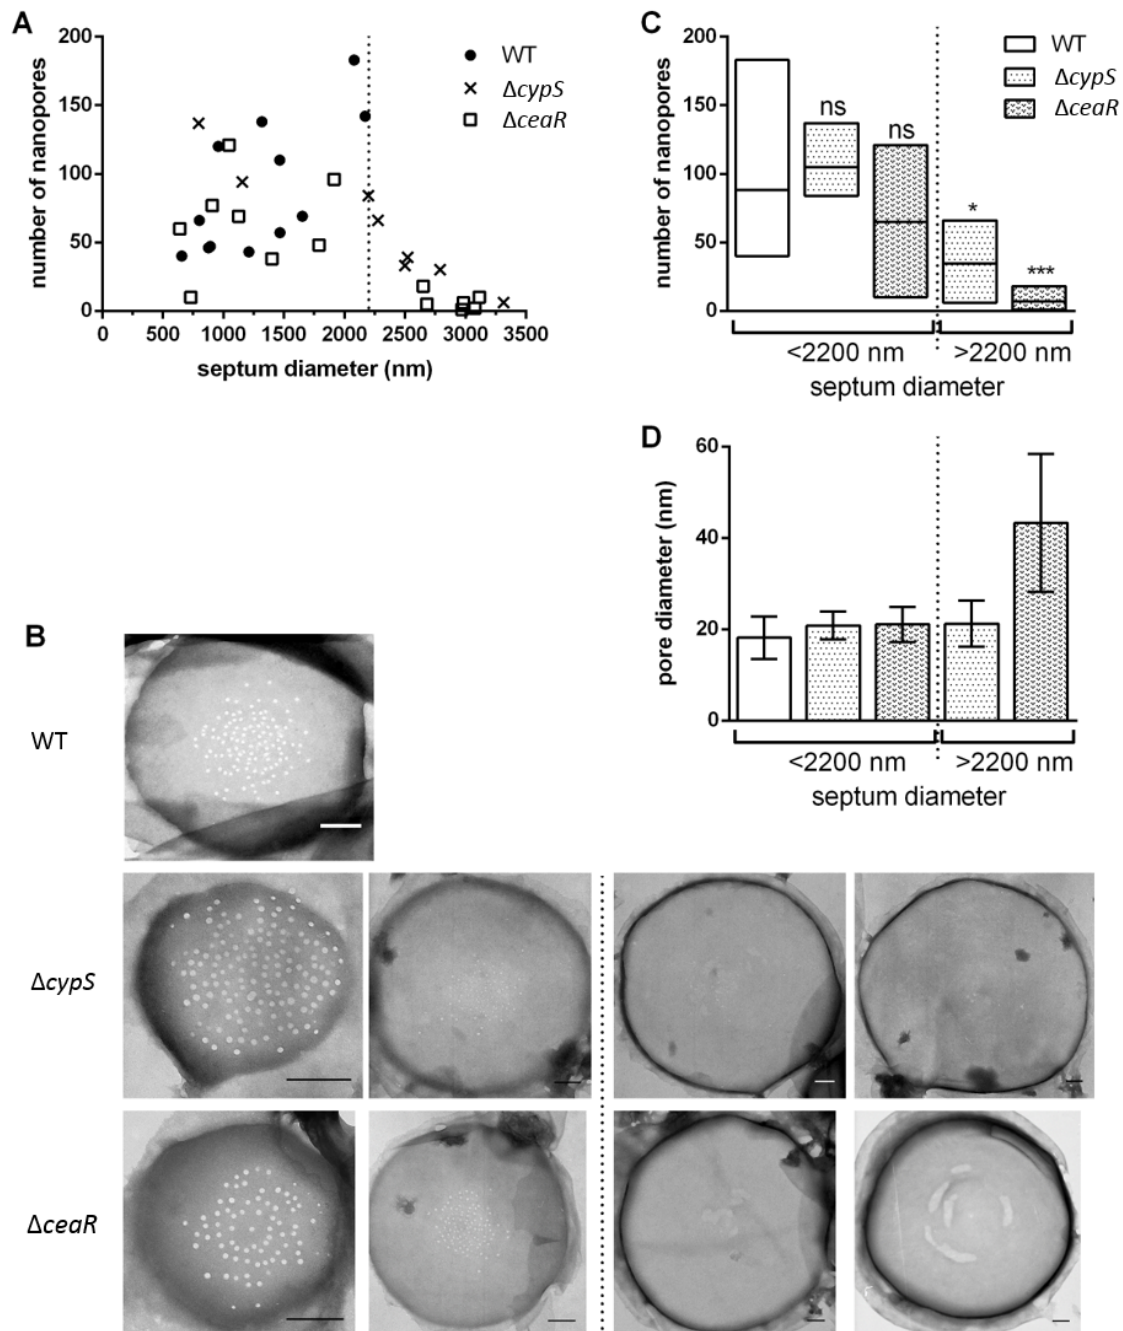

768

769 **Supplementary Fig. 14: Septal nanopore array**

770 (a) The number of nanopores is shown correlated to the septum size. In contrast to the WT, *Anabaena* CCRP  
771 mutants show a subset of large septa (>2200 nm) with few nanopores.

772 (b) Representative transmission electron microscopy images of indicated strains are shown. The dotted line divides  
773 the septa into a diameter of <2200 nm (left) and >2200 nm (right) derived from (a). Scale bars: 250 nm.

774 (c) Number of pores per septum (</> 2200 nm). Student's t-test (mutants vs. WT). P-values are indicated (ns: not  
775 significant, \*P<0.05, \*\*\*P<0.001). P-values were calculated from the following number of septa: n (WT) = 12; n  
776 ( $\Delta cypS$  <2200 nm) = 3; n ( $\Delta ceaR$  <2200 nm) = 8; n ( $\Delta cypS$  >2200 nm) = 5; n ( $\Delta ceaR$  >2200 nm) = 6. WT data were  
777 derived from Bornikoel, *et al*<sup>102</sup>.

778 (d) Nanopore diameter. Floating bars show the mean value from the number of analyzed nanopores. Sample size  
779 was n (WT) = 1061; n ( $\Delta cypS$  <2200 nm) = 315; n ( $\Delta ceaR$  <2200 nm) = 371; n ( $\Delta cypS$  >2200 nm) = 174; n ( $\Delta ceaR$   
780 >2200 nm) = 42.

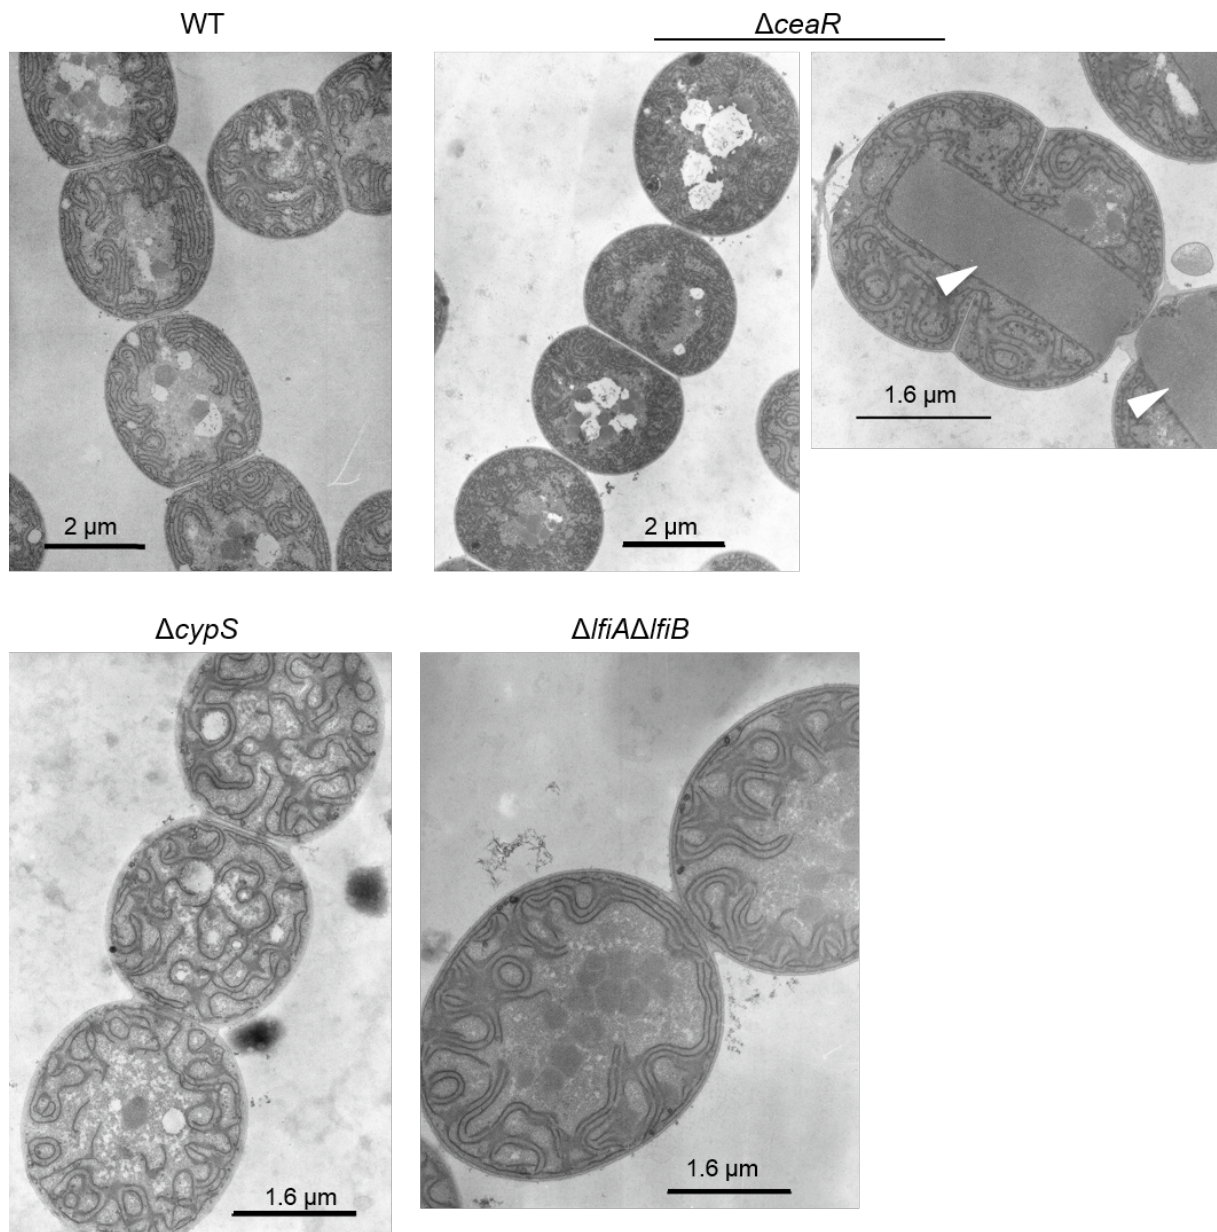

781

782 **Supplementary Fig. 15: Ultrastructure of *Anabaena* WT and CCRP mutant strains**

783 Ultrathin sections of *Anabaena* WT and *Anabaena* CCRP mutant strains grown on BG11 plates. White triangles indicate  
784 unusual structures in the  $\Delta ceaR$  mutant that coincide with the observed red fluorescent filaments in the  $\Delta ceaR$  mutant  
785 visualized by live cell fluorescence microscopy (Fig. 3d, Supplementary Fig. 9e).



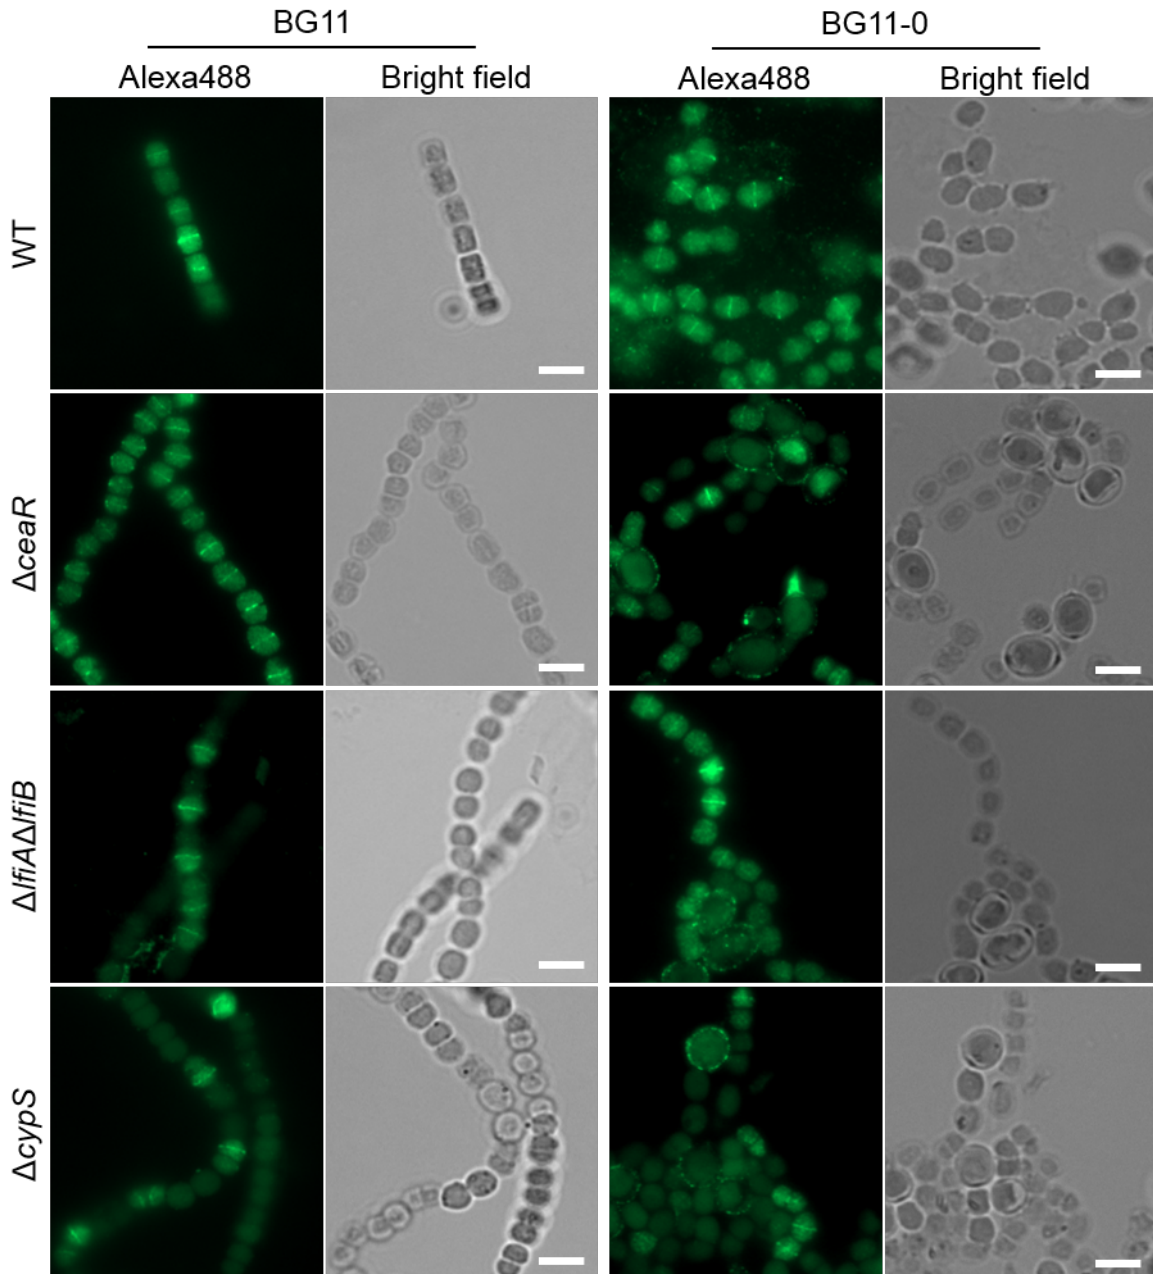

786

787 **Supplementary Fig. 16: FtsZ localization is unaffected in *Anabaena* CCRP mutant strains**

788 Alexa Fluor-488 fluorescence and bright field micrographs of *Anabaena* WT and  $\Delta ceaR$ ,  $\Delta lfiA\Delta lfiB$  and  $\Delta cypS$   
789 mutant strains grown on BG11 or BG11<sub>0</sub> growth plates. Cells were subjected to immunofluorescence staining using  
790 anti-FtsZ primary antibody and Alexa Fluor-488 coated secondary antibody essentially as described by Ramos-  
791 León *et al.*<sup>82</sup>. Cells were mounted in ProLong Diamond antifade mountant (Thermo Fischer Scientific). Scale bars:  
792 5  $\mu$ m.



BG11-0

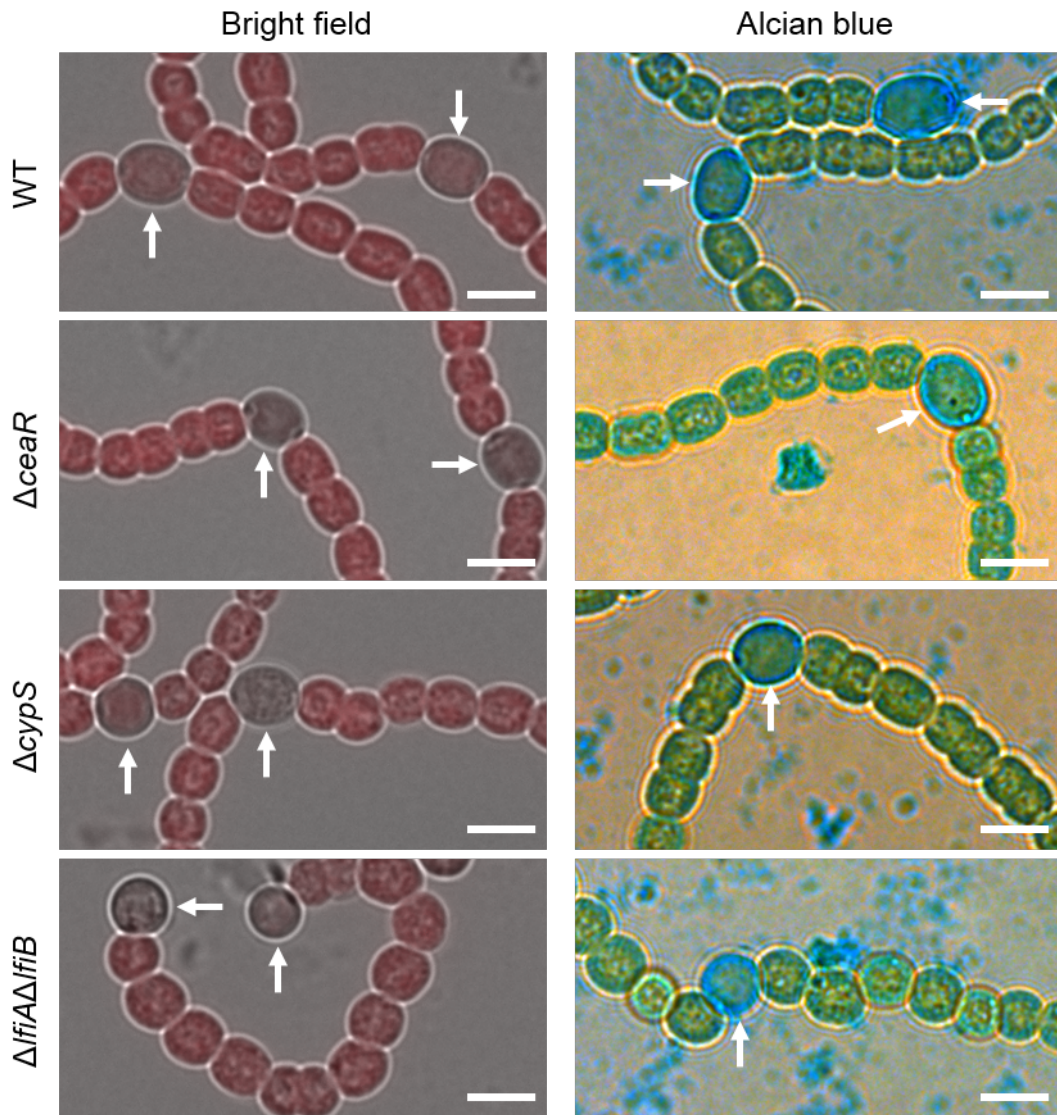

799 **Supplementary Fig. 18: Alcian blue staining is unaltered in *Anabaena* CCRP mutant strains**

800 Bright field micrographs of *Anabaena* WT and  $\Delta ceaR$ ,  $\Delta lfiA\Delta lfiB$  and  $\Delta cypS$  mutant strains grown on BG11<sub>0</sub> plates.  
801 Cells were either observed directly by bright field microscopy or previously stained with 0.5% alcian blue (final  
802 concentration). Heterocysts are indicated by white arrows. Scale bars: 5  $\mu$ m.

803

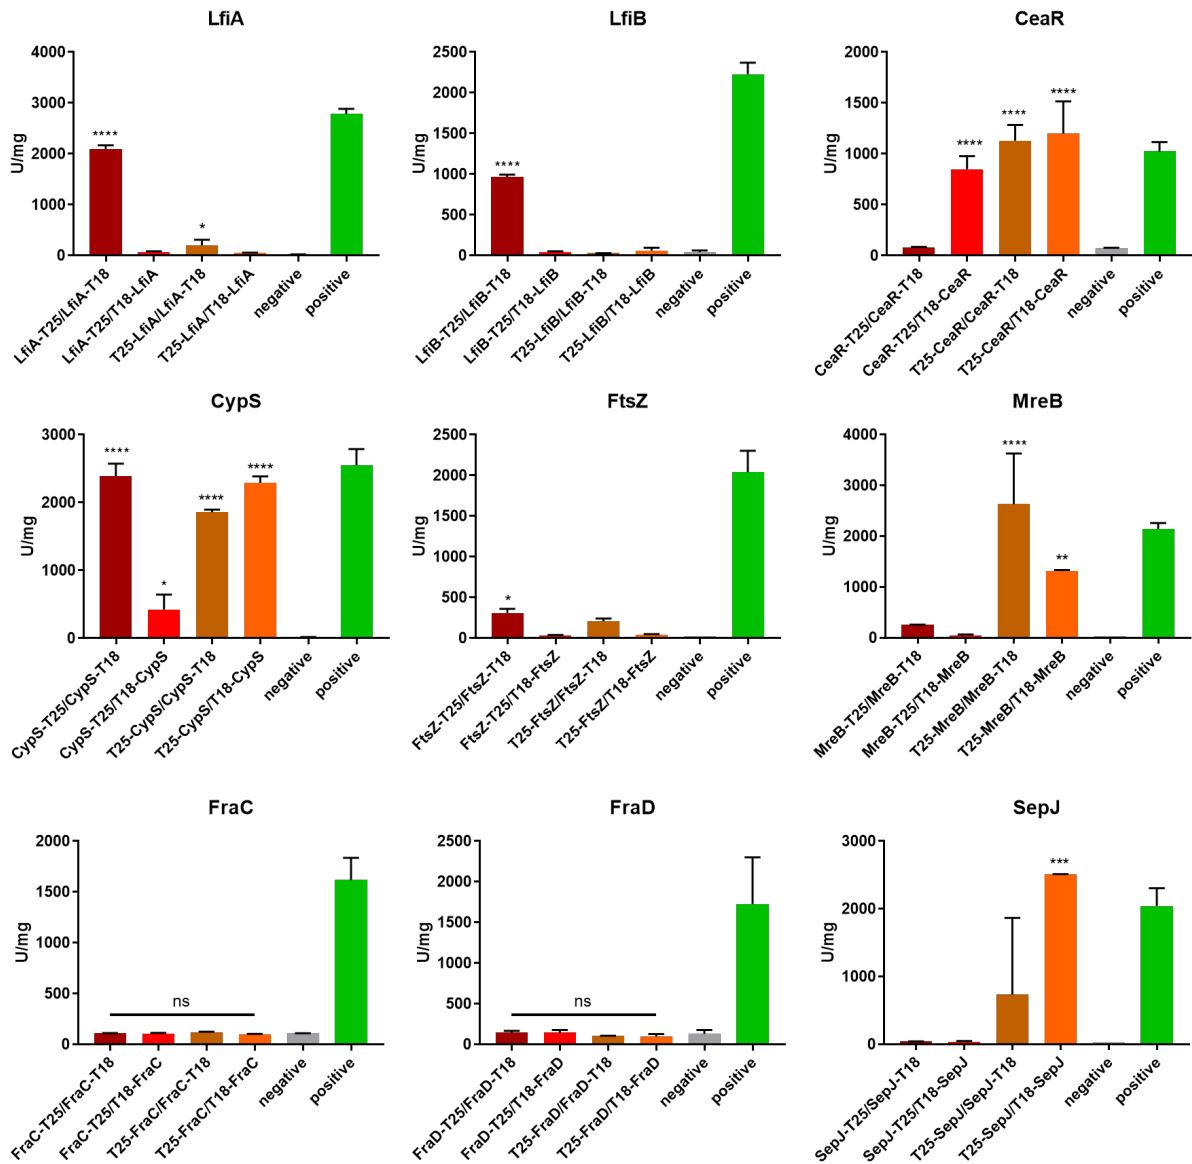

804

805 Figure description follows on page 47.

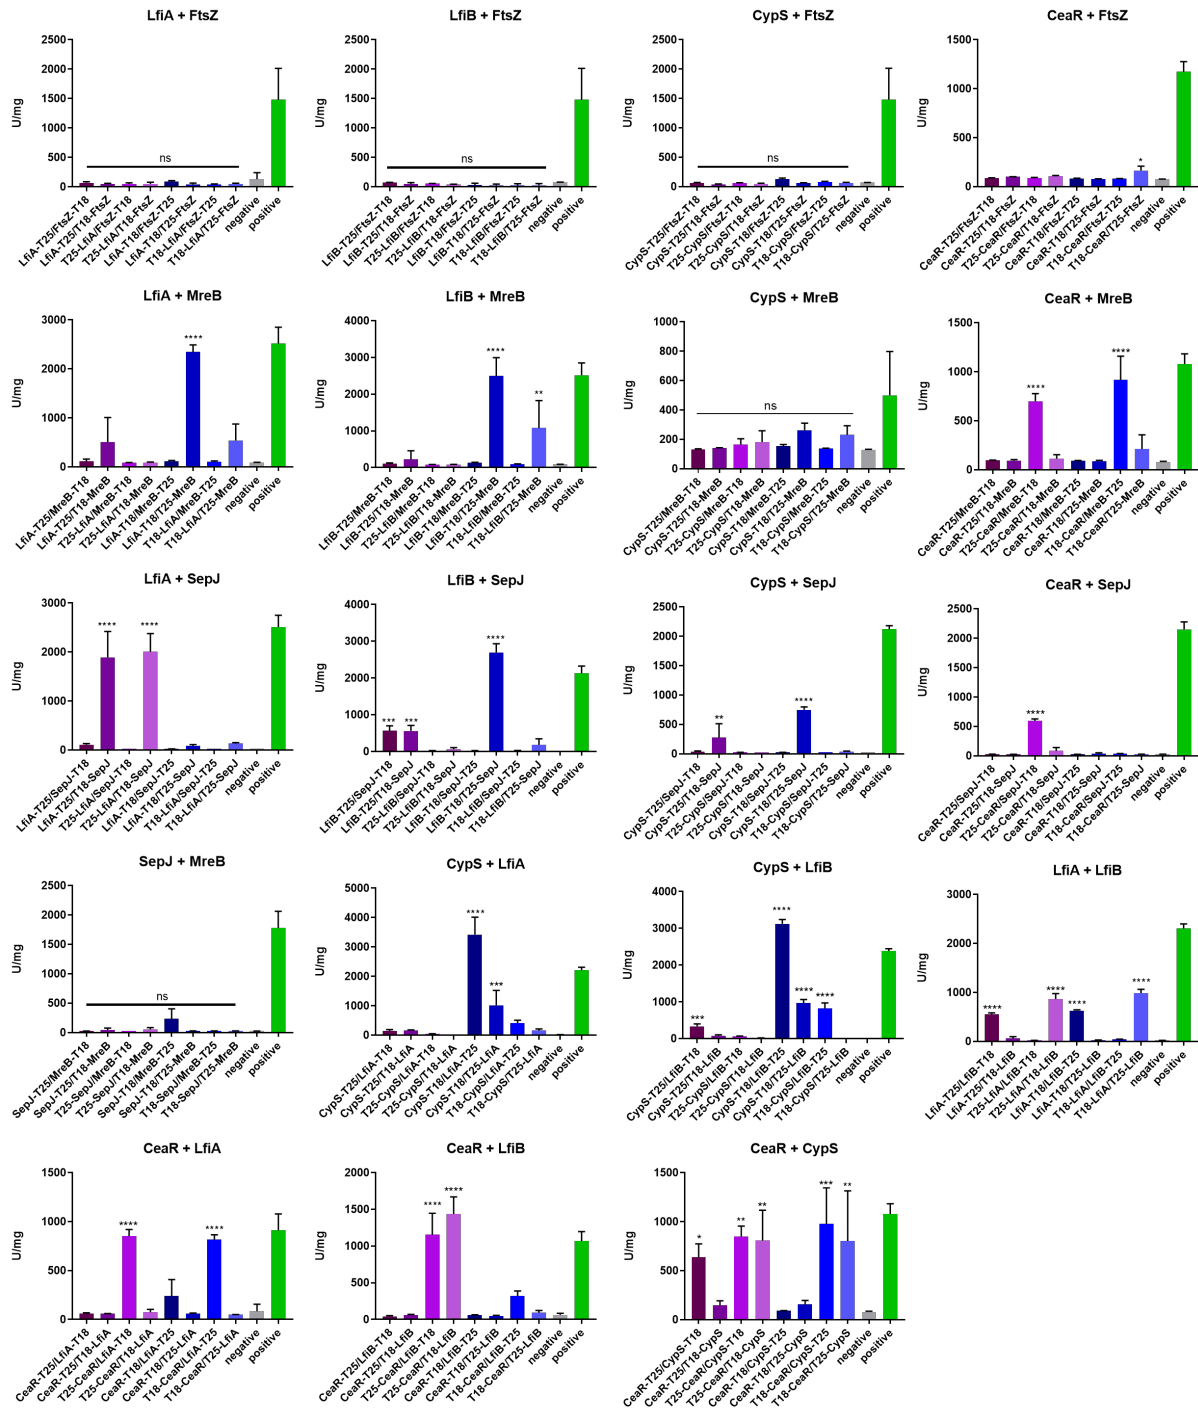

806

807 Figure description follows on page 47.



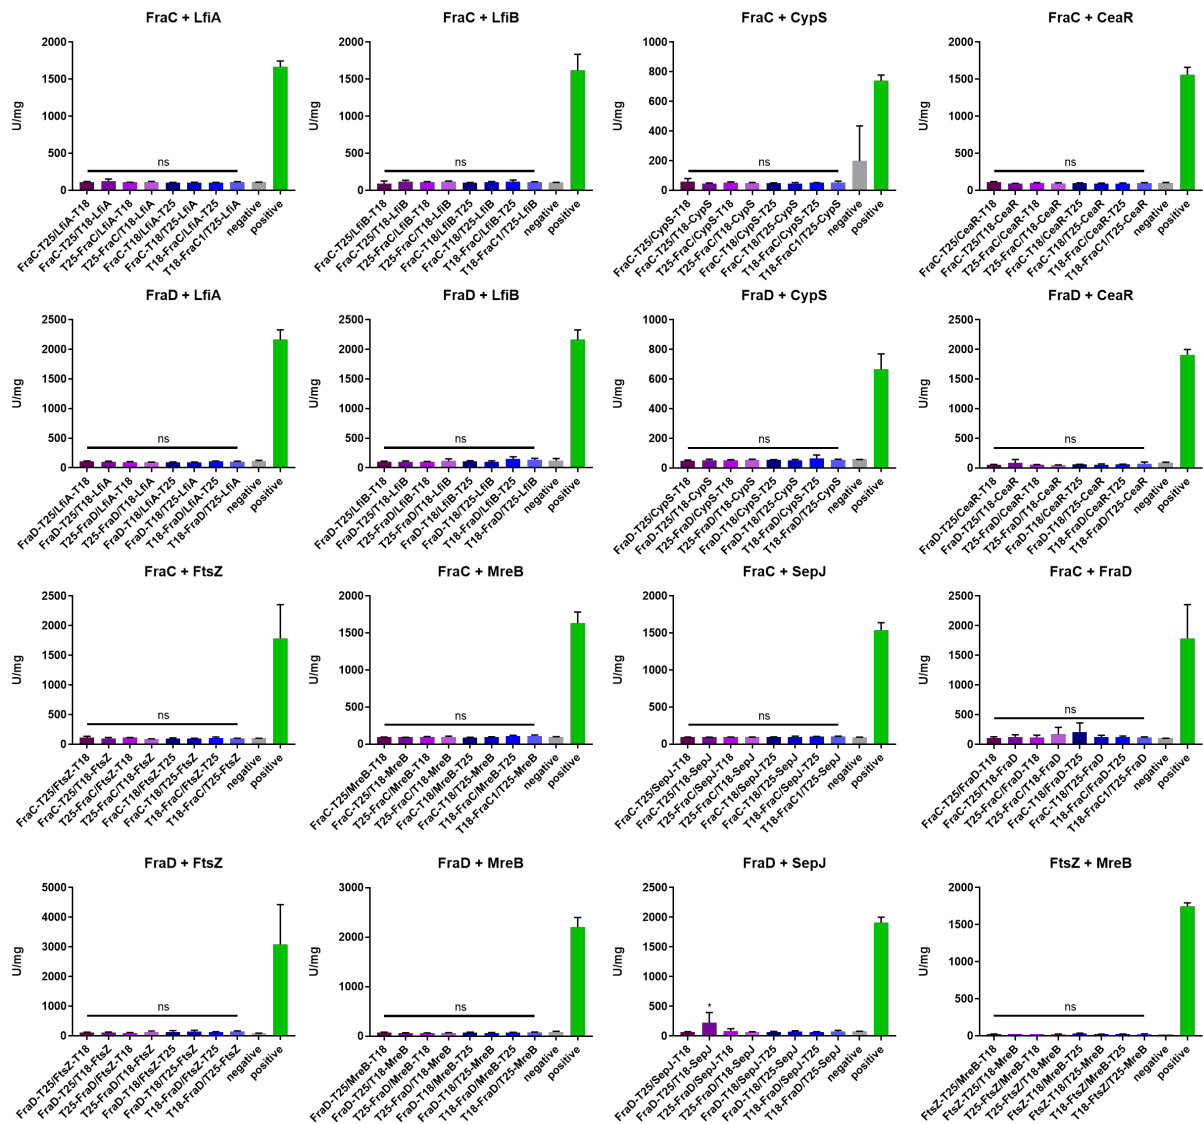

808

809 **Supplementary Fig. 19: *Anabaena* possess a complex cytoskeletal network that is linked to a septal junction**  
 810 **protein**

811 Beta-galactosidase assays of *E. coli* BTH101 cells co-expressing indicated T25 and T18 translational fusions of all  
 812 possible pair-wise combinations. *E. coli* cells carrying the respective plasmids were subjected to beta-galactosidase  
 813 assay as described by Karimova *et al.*<sup>103</sup> in triplicates from three independent colonies grown for 2 d at 20 °C.  
 814 Quantity values are given in Miller Units per milligram LacZ of the mean results from three independent colonies.  
 815 Negative: N-terminal T25 fusion construct of the respective protein co-transformed with empty pUT18C. Positive:  
 816 Zip/Zip control. Error bars indicate standard deviations (n = 3). \*: P < 0.05, \*\*: P < 0.01, \*\*\*: P < 0.001, \*\*\*\*: P <  
 817 0.0001 (Dunnett's multiple comparison test and one-way ANOVA).

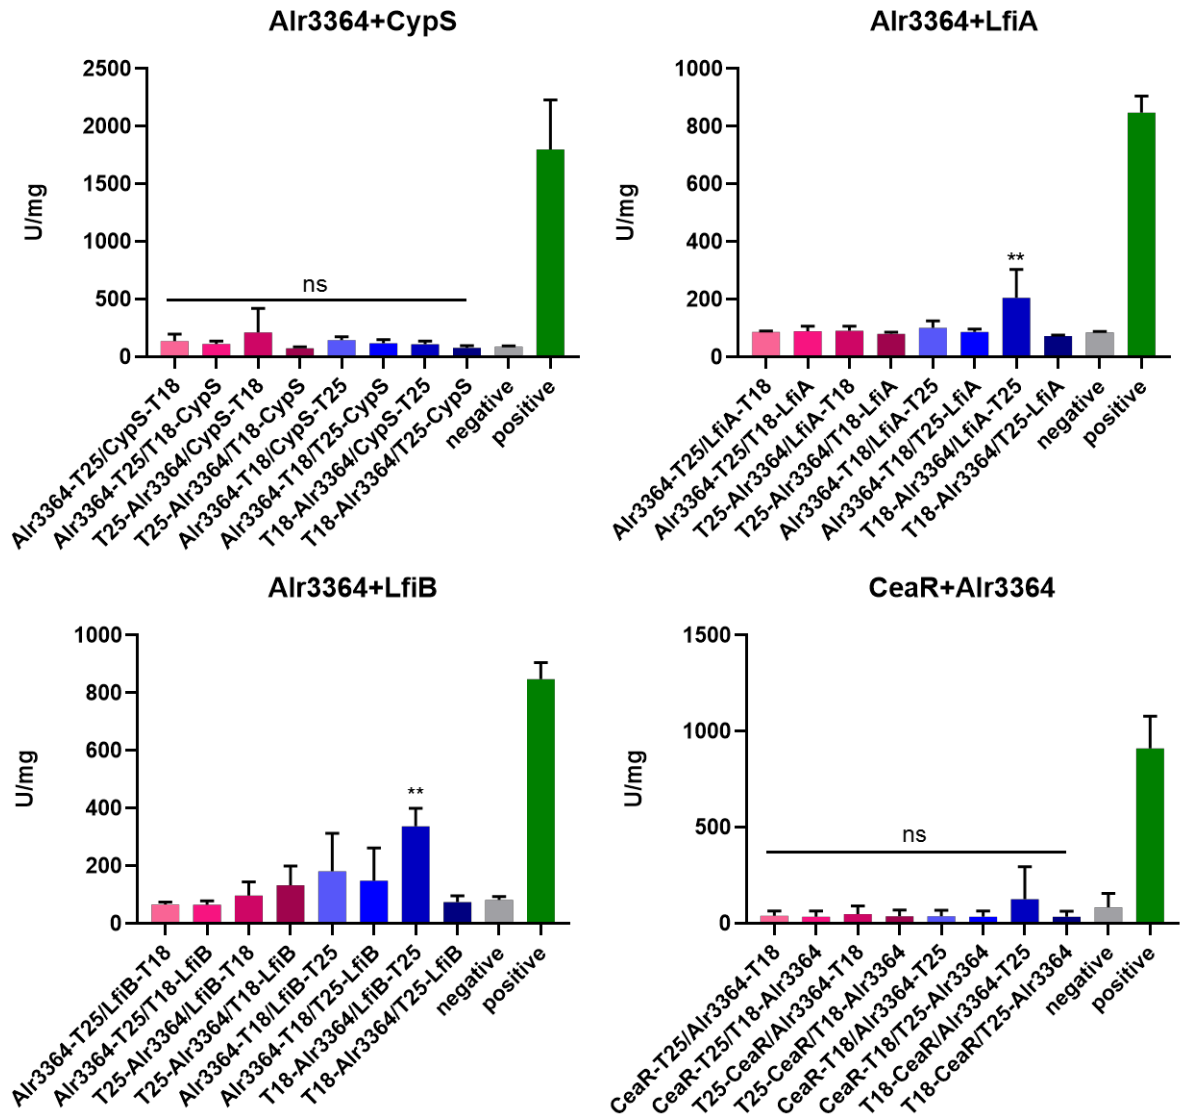

818

819 **Supplementary Fig. 20: Interaction of *Anabaena* IF-like CCRPs is specific in a bacterial two hybrid system**

820 Beta-galactosidase assays of *E. coli* BTH101 cells co-expressing indicated T25 and T18 translational fusions of all  
 821 possible pair-wise combinations. *E. coli* cells carrying the respective plasmids were subjected to beta-galactosidase  
 822 assay as described by Karimova *et al.*<sup>103</sup> in triplicates from three independent colonies grown for 2 d at 20 °C.  
 823 Quantity values are given in Miller Units per milligram LacZ of the mean results from three independent colonies.  
 824 Negative: N-terminal T25 fusion construct of the respective protein co-transformed with empty pUT18C. Positive:  
 825 Zip/Zip control. Error bars indicate standard deviations (n = 3). Values indicated with \* are significantly different from  
 826 the WT. \*\*: P < 0.01 (Dunnett's multiple comparison test and one-way ANOVA).



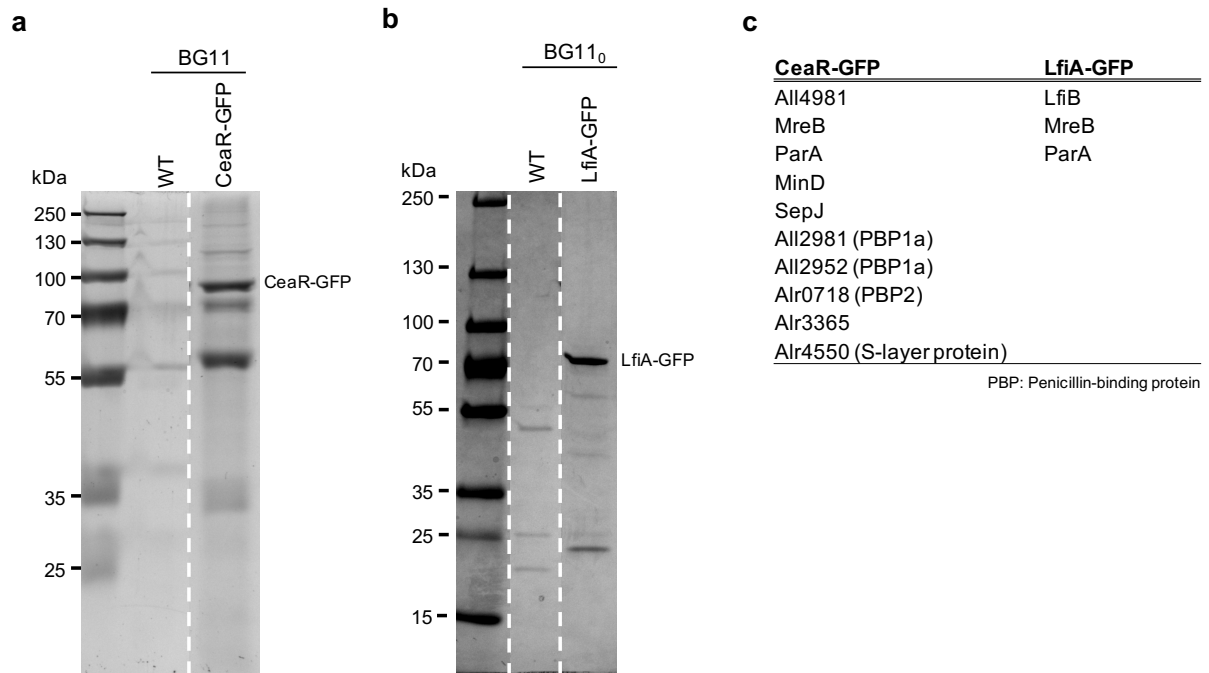

827

828 **Supplementary Fig. 21: Identification of proteins interacting with *Anabaena* CCRPs**

829 (a,b) Cell-free extracts of *Anabaena* WT expressing (a) CeaR-GFP or (b) LfiA-GFP from  $P_{petE}$  were subjected to co-  
 830 immunoprecipitation using anti-GFP magnetic beads ( $\mu$ MACS GFP isolation Kit; Miltenyi Biotec). CeaR-GFP-  
 831 expressing cells were grown in BG11 without copper and protein expression was induced for 1 d with  $0.5 \mu\text{M}$   $\text{CuSO}_4$ .  
 832 LfiA-GFP expressing cells were grown in BG11<sub>0</sub> without copper and protein expression was induced for 5 d with  
 833  $0.5 \mu\text{M}$   $\text{CuSO}_4$ . *Anabaena* WT cells were grown in BG11 and BG11<sub>0</sub> supplemented with  $0.5 \mu\text{M}$   $\text{CuSO}_4$  for 1 or  
 834 5 d, respectively. Cells were lysed in PBS-N and pooled duplicates of precipitated proteins of two independent  
 835 experiments were analyzed by mass spectrometry and 25  $\mu\text{l}$  of the co-precipitate were resolved in a (a) 10% SDS-  
 836 polyacrylamide gel or in a (b) 4-15% TGX precast gel (Bio-Rad) and detected by Quick Coomassie stain (Serva).

837 (c) Excerpt of the identified specific interactors of CeaR-GFP and LfiA-GFP. The full list is listed in Supplementary  
 838 File 3. Notably, CeaR directly interacts with All4981, another filament forming protein in *Anabaena* (covered in a  
 839 separate report) as well as Alr3365 that lies directly downstream of *alr3364* in the *Anabaena* genome, which we  
 840 also identified in our screening for CCRPs in *Anabaena* (Supplementary Fig. 1). Both, CeaR and LfiA, interact with  
 841 ParA, hinting for a putative role in chromosome or plasmid segregation in *Anabaena*.

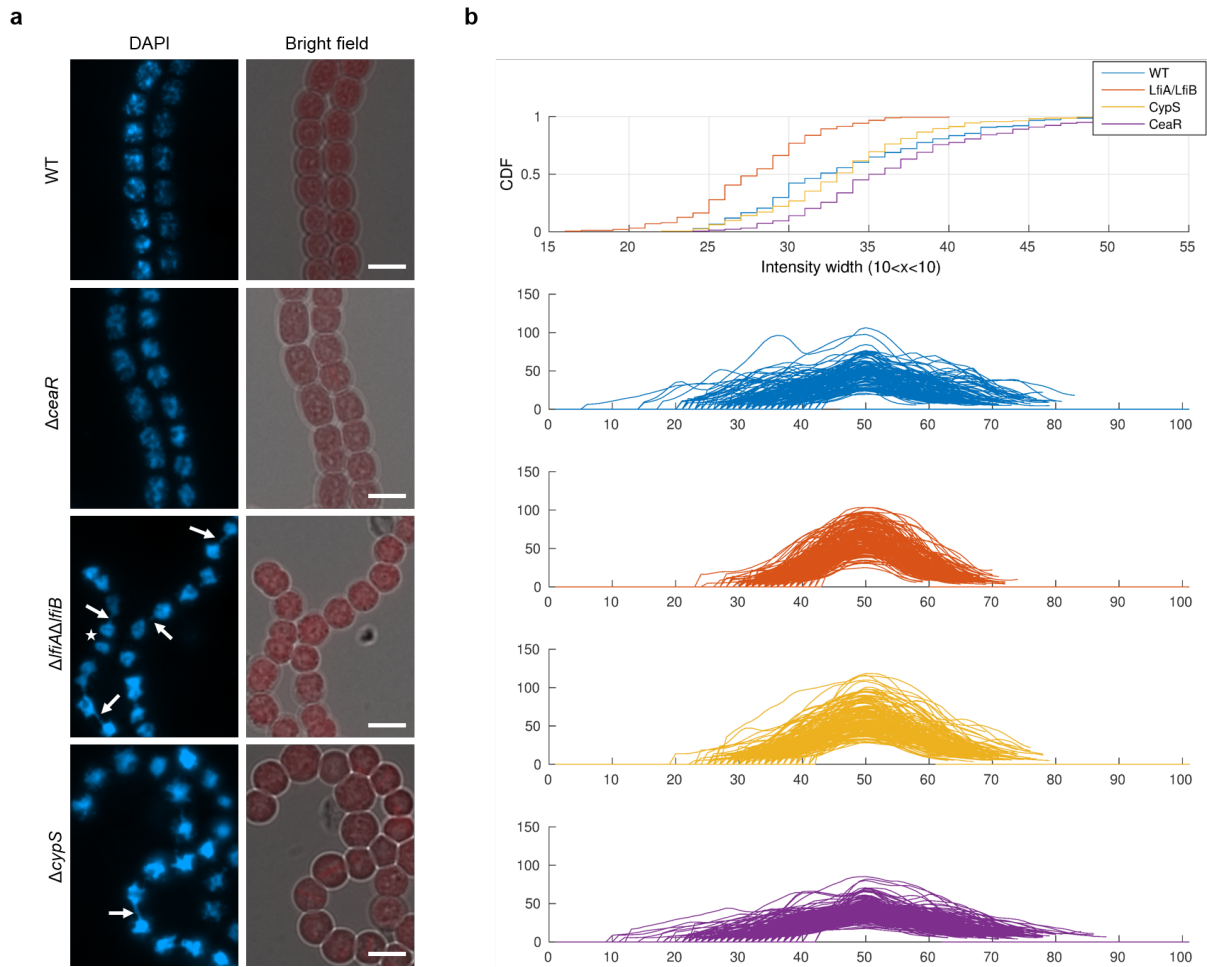

842

843 **Supplementary Fig. 22: Condensation of intracellular DNA in *Anabaena* CCRPs**

844 (a) DAPI fluorescence and merged bright field and chlorophyll autofluorescence micrographs of *Anabaena* WT and  
 845  $\Delta ceaR$ ,  $\Delta lfiA\Delta lfiB$  and  $\Delta cypS$  mutant strains grown on BG11 growth plates. Cells were resuspended in BG11 and  
 846 incubated with  $10 \mu\text{g ml}^{-1}$  DAPI (final concentration). White arrows indicate strings of DNA that traverse from one  
 847 cell to the other. Notably, no such strings are observed in dividing cells (white star), suggesting that it is an effect  
 848 that occurs after complete cell division. Scale bars:  $5 \mu\text{m}$ .

849 (b) Plot profile showing the DAPI signal intensities of pixels (grey value) along *Anabaena* WT and *Anabaena* mutant  
 850 cells ( $n = 151$  for each strain) in arbitrary units (a.u.) and arranged to the respective peak maxima. The focal area  
 851 size in the  $\Delta lfiA\Delta lfiB$  mutant was smallest in comparison to the other strains,  $\Delta ceaR$  was larger than the others,  
 852 and the area size in WT was not significantly different than  $\Delta cypS$  ( $\alpha = 0.05$ , using Tukey test). Notably, the  
 853 comparison of cell size among the strains reveals a similar result: the  $\Delta lfiA\Delta lfiB$  mutant cell size was smallest in  
 854 comparison to the other strains,  $\Delta ceaR$  was larger than the others, and the area size in WT was not significantly  
 855 different than the  $\Delta cypS$  mutant ( $P = 1.75 \times 10^{-54}$ , using Kruskal-wallis;  $\alpha = 0.05$ , using Tukey test). Consequently,  
 856 we compared the area of the focal DAPI staining decided by the cell size among the strains. This reveals that this  
 857 ratio is smallest in  $\Delta ceaR$ , largest in  $\Delta cypS$  and not significantly different between  $\Delta lfiA\Delta lfiB$  and the WT.

8 **Supplementary Table 1: Characteristics of protein candidates**

| Locus tag                         | Genus                | Subsection | Homolog distribution | Predicted proteins of similar structure (I-TASSER)                                                     | Conserved domains                              | Others                                          | 859 |
|-----------------------------------|----------------------|------------|----------------------|--------------------------------------------------------------------------------------------------------|------------------------------------------------|-------------------------------------------------|-----|
| <i>crescentin</i>                 | <i>C. crescentus</i> | n/a        | n/a                  | Cytoplasmic domain of bacterial cell division protein EzrA                                             | SMC_N, CCDC158                                 | Validated IF-like protein <sup>86,107–109</sup> |     |
| <i>cypS</i><br>( <i>alr0931</i> ) | <i>Anabaena</i>      | IV         | I, II, III, IV, V    | Cytoplasmic domain of bacterial cell division protein EzrA                                             | SMC_N, CCDC158<br>DUF3084, Neuromodulin_N      |                                                 |     |
| <i>all4981</i>                    | <i>Anabaena</i>      | IV         | III, IV, V           | TTC7B/Hyccin Complex or Clathrin coat                                                                  | TPR                                            | 4 bp overlap to <i>all4982</i>                  |     |
| <i>lfiA</i><br>( <i>alr4504</i> ) | <i>Anabaena</i>      | IV         | I, II, III, IV, V    | Spectrin repeats 7, 8, and 9 of the plakin domain of plectin                                           | SMC_N                                          | <i>lfiB</i> localized downstream of <i>lfiA</i> |     |
| <i>lfiB</i><br>( <i>alr4505</i> ) | <i>Anabaena</i>      | IV         | I, II, III, IV, V    | Cytoplasmic domain of bacterial cell division protein EzrA                                             | SMC_N, DUF3552                                 |                                                 |     |
| <i>ceaR</i><br>( <i>all2460</i> ) | <i>Anabaena</i>      | IV         | III, IV, V           | Cytoplasmic domain of bacterial cell division protein EzrA                                             | SMC_N, TerB_C, CALCOCO1, Spc7                  | Two N-terminal TMHs                             |     |
| <i>alr0347</i>                    | <i>Anabaena</i>      | IV         | I, II, III, IV, V    | <i>Bacillus subtilis</i> Smc coiled-coil middle fragment                                               | Filament superfamily                           |                                                 |     |
| <i>alr3364</i>                    | <i>Anabaena</i>      | IV         | II, III, IV, V       | Cytoplasmic domain of bacterial cell division protein EzrA                                             | SMC_N, FtsK, DUF4696                           |                                                 |     |
| <i>all8023</i>                    | <i>Anabaena</i>      | IV         | IV                   | Human ATR-ATRIP complex                                                                                | SMC_N, Pentapeptide, Yjbl                      |                                                 |     |
| <i>alr4393</i>                    | <i>Anabaena</i>      | IV         | I, II, III, IV, V    | Cytoplasmic domain of bacterial cell division protein EzrA                                             | SMC_N, DUF3084                                 |                                                 |     |
| <i>alr4911</i>                    | <i>Anabaena</i>      | IV         | I, II, III, IV, V    | Structure of the Smc head domain with a coiled coil and joint derived from <i>Pyrococcus yayanosii</i> | SMC_N, P-loop_NTPase<br>DNA_S_dndD, Spc7, SbcC |                                                 |     |
| <i>all4935</i>                    | <i>Anabaena</i>      | IV         | IV                   | Cytoplasmic domain of bacterial cell division protein EzrA                                             | DUF4114, DUF3084                               |                                                 |     |
| <i>alr2043</i>                    | <i>Anabaena</i>      | IV         | IV, V                | Human ATR-ATRIP complex (replication stress response)                                                  | SMC_N, Tubulin_2                               |                                                 |     |
| <i>alr3988</i>                    | <i>Anabaena</i>      | IV         | I, II, III, IV, V    | Two dynein tail domains bound to dynactin and BICDR1                                                   | SMC_N, SbcC                                    |                                                 |     |

The first column indicates the respective locus tags of protein candidates and Crescentin. The second and third column indicate the respective subsection of the corresponding genus according to Rippka *et al.* (1979)<sup>36</sup>. Column four lists the subsections that contain homologous proteins to the respective candidate. Column five contains proteins predicted to be structurally similar to the protein candidates in the PDB (Protein Data Bank) based on I-TASSER<sup>104–106</sup>. The sixth column indicates predicted sub-domains of protein candidates identified by BLAST CDS. Column seven states other features of interest. Abbreviations: (TMH) Transmembrane helix; (DUF) Domain of unknown function; (CCDC158) Coiled-coil domain-containing protein 158; (SMC) Structural maintenance of chromosomes; (SbcC) DNA repair exonuclease SbcCD ATPase; (CALCOCO1) Calcium binding and coiled-coil domain; (TRP): Tetratricopeptide repeat; (Spc7) Spc7 kinetochore protein; (TerB\_C) TerB-C occurs C-terminal of TerB in TerB-N containing proteins, putative metal chelating; (Filament superfamily) Intermediate filament protein; (FtsK) DNA segregation ATPase FtsK; (Pentapeptide) Pentapeptide repeats often found in many cyanobacterial proteins with unknown function (predicted to be a  $\beta$ -helix); (Yjbl) Uncharacterized protein containing pentapeptide repeats; (DNA\_S\_dndD) DNA sulfur modification protein DndD; (Tubulin\_2 superfamily) Tubulin like; Many of the residues conserved in Tubulin (pfam00091) are also conserved in this family; (P-loop\_NTPase) P-loop containing Nucleoside Triphosphate Hydrolases superfamily. n/a: not applicable.

## 860 **Material and methods**

### 861 Bacterial strains and growth conditions

862 *Anabaena* WT was obtained from the Pasteur Culture Collection (PCC) of cyanobacteria  
863 (France). Cells were grown photoautotrophically in BG11 or without combined nitrogen (BG11<sub>0</sub>)  
864 at constant light with a light intensity of 30  $\mu\text{mol m}^{-2} \text{s}^{-1}$ . When appropriate, 5  $\mu\text{g ml}^{-1}$   
865 spectinomycin (Sp), 5  $\mu\text{g ml}^{-1}$  streptomycin (Sm) or 30  $\mu\text{g ml}^{-1}$  neomycin (Nm) was added to  
866 strains carrying respective plasmids or chromosomal insertions. In some cases, basal copper-  
867 regulated *petE*-driven expression of gene candidates in *Anabaena* cells was lethal or growth  
868 inhibiting, therefore these strains were grown in BG11 without copper and protein expression  
869 was later induced by the addition of  $\text{CuSO}_4$  at indicated concentrations to the culture. *E. coli*  
870 strains DH5 $\alpha$ , DH5 $\alpha$ MCR, XL1-blue and HB101 were used for cloning and conjugation by  
871 triparental mating. BTH101 was used for BACTH system and BL21 (DE3) was used for  
872 expression of His<sub>6</sub>- and GFP-tagged proteins in *E. coli*. All strains were grown in LB medium  
873 containing the appropriate antibiotics at standard concentrations. Supplementary Tables 2-5  
874 list all used bacterial strains, plasmids and oligonucleotides.

875

### 876 Prediction of coiled-coil rich proteins

877 Genome sequence of *Anabaena* (GCA\_000009705.1) was analyzed by the COILS algorithm<sup>98</sup>  
878 as described by Bagchi *et al.*<sup>32</sup>. The algorithm was run with a window width of 21 and the cut-  
879 off for amino acids in coiled-coil conformation was set to  $\geq 80$  amino acid residues. The  
880 resulting set of protein candidates was further manually examined with online available  
881 bioinformatic tools (NCBI Conserved Domain Search, NCBI BLAST, TMHMM Server,  
882 PSORTb, I-TASSER). Protein candidates exhibiting BLAST hits involved in cytoskeletal  
883 processes or similar domain architectures as known IF proteins like CreS, FilP, vimentin,  
884 desmin or keratin were selected, and enzymatic proteins as well as proteins predicted to be  
885 involved in other cellular processes were excluded.

886

### 887 Distribution of homologs in cyanobacteria

888 Cyanobacteria species tree is according to Dagan *et al.*<sup>110</sup> with the root of the tree as recently  
889 inferred by Tria, Landan and Dagan<sup>111</sup>. Homologs to the *Anabaena* proteins were detected by  
890 amino acid sequence similarity using stand-alone BLAST<sup>112</sup> ver. 2.2.26. Protein sequences  
891 that were found as BLAST hits with a threshold of E-value  $\leq 1 \times 10^{-5}$  were further compared to  
892 the *Anabaena* protein by global alignment using needle<sup>113</sup>. Hits having  $\geq 30\%$  identical amino

893 acids in the global alignment were considered as homologs. The phylogenetic tree was  
894 visualized with iTOL<sup>114</sup>.

895

#### 896 Genomic DNA and RNA isolation and cDNA synthesis

897 Genomic DNA (gDNA) from *Anabaena* was isolated using the GeneJET Plant Genomic DNA  
898 Purification Kit (Thermo Fischer Scientific) and the DNeasy Plant Mini Kit (QIAGEN) according  
899 to the manufacturer's instructions from 10 ml cyanobacterial cultures.

900 RNA from *Anabaena* WT was isolated using the Direct-zol™ RNA MiniPrep Kit (Zymo  
901 Research) according to the manufacturer's instructions. RNA was isolated in technical  
902 triplicates from 10 ml cultures. Isolated RNA was treated with DNA-free™ Kit (2 units  
903 rDNAs/reaction; Thermo Fischer Scientific) and 200 ng RNA was reverse transcribed using  
904 the qScript™ cDNA Synthesis Kit (Quanta Biosciences). RT-PCR of cDNA samples for *mpB*,  
905 *cypS*, *ceaR*, *lfiA*, *lfiB* and *lfiA+lfiB* was done using primer pairs #1/#2, #3/#4, #5/#6, #7/#8,  
906 #9/#10, #7/#10, respectively.

907

#### 908 Transformation

909 Transformation of chemically competent *E. coli* was performed by the standard heat shock  
910 procedure<sup>115</sup>. *Anabaena* was transformed by triparental mating according to Ungerer and  
911 Pakrasi<sup>116</sup>. Briefly, 100 µl of overnight cultures of DH5α carrying the conjugal plasmid pRL443  
912 and DH5αMCR carrying the cargo plasmid and the helper plasmid pRL623, encoding for three  
913 methylases, were mixed with 200 µl *Anabaena* culture (for transformation into *Anabaena*  
914 mutant strains, cells were scraped from the plate and resuspended in 200 µl BG11). This  
915 mixture was directly applied onto sterilized nitrocellulose membranes placed on top of BG11  
916 plates supplemented with 5% LB medium. Cells were incubated in the dark at 30 °C for 6-8 h  
917 with subsequent transfer of the membranes to BG11 plates. After another 24 h, membranes  
918 were transferred to BG11 plates supplemented with appropriate antibiotics.

919

#### 920 Plasmid construction

921 Ectopic expression of *Anabaena* protein candidates was achieved from a self-replicating  
922 plasmid (pRL25C<sup>117</sup>) under the control of the copper-inducible *petE* promoter ( $P_{petE}$ ) or the  
923 native promoter (predicted by BPROM<sup>61</sup>) of the respective gene. All constructs were verified  
924 by Sanger sequencing (Eurofins Genomics).

925 Initially, we generated pTHS1 (pRL25C, P<sub>petE</sub>::*lfiA-gfp*), which served as template for many  
926 other pRL25C-based plasmids employed in this study. For this, P<sub>petE</sub> and *lfiA* were amplified  
927 from *Anabaena* gDNA using primers #11/#12 and #13/#14, respectively. *gfpmut3.1* was  
928 amplified from pJET1.2 containing P<sub>petE</sub>-*gfp*<sup>118</sup> using primers #15/#16. This *gfpmut3.1*  
929 (hereafter *gfp*) is deprived of its internal NdeI site and contains a 5' linker sequence of 12  
930 alternating codons encoding for alanine and serine. The PCR fragments were next ligated into  
931 PCR-amplified pRL25C (using primers #17/#18) by Gibson assembly.

932 For pTHS2 (pRL25C, P<sub>petE</sub>::*lfiB-gfp*) and pTHS3 (pRL25C, P<sub>petE</sub>::*ceaR-gfp*), *lfiB* and *ceaR* were  
933 amplified from *Anabaena* gDNA using primers #19/#20 or #21/#22, respectively and ligated  
934 into PCR-linearized pTHS1 (using primers #23/#24; thereby removing only *lfiA* and leaving  
935 P<sub>petE</sub> and *gfp* in the vector) by Gibson assembly.

936 For pTHS4 (pRL25C, P<sub>petE</sub>::*cypS-gfp*), *cypS* was amplified by PCR from *Anabaena* gDNA  
937 using primers #36/#38, introducing NdeI and SacI sites, and then ligated into pJET1.2-  
938 P<sub>petE</sub>::*gfp*, thereby generating P<sub>petE</sub>::*cypS-gfp* which is flanked by a 5' BamHI site and a 3' EcoRI  
939 site. The P<sub>petE</sub>::*cypS-gfp* fragment was excised by BamHI and EcoRI and ligated into BamHI  
940 and EcoRI-digested pRL25C.

941 For pTSH5 (pRL25C, P<sub>petE</sub>::*trunc-ceaR-gfp*), pTHS3 was amplified using primers #148/#148  
942 and re-ligated using Quick Ligase (NEB). Thereby, the first 153 bp from *ceaR* were removed

943 For pTHS6 (P<sub>petE</sub>::*cypS-his*), *cypS-his* was amplified from pTHS8 using primers #25/#26 and  
944 ligated into PCR-linearized pRL25C (using primers #24/#27) by Gibson assembly.

945 For pTHS7 (pRL25C, P<sub>petE</sub>::*lfiA-ecfp*, P<sub>petE</sub>::*lfiB-gfp*), P<sub>petE</sub>-*lfiA* was amplified from pTHS1 using  
946 primers #28/#29 and ligated into ClaI-digested pRL25C by Gibson assembly together with  
947 *myc-link-ecfp* (initially amplified with primers #30/#31, purified and then again amplified with  
948 primers #32/#33). This construct was digested by BamHI and ligated by Gibson assembly with  
949 PCR-amplified P<sub>petE</sub>::*lfiB-gfp* from pTHS2 (using primers #34/#35).

950 pET21a(+) plasmids bearing C-terminal His-tag translational fusions of CCRPs were  
951 generated by restriction-based cloning techniques. For this, *cypS*, *lfiA*, *lfiB* or *ceaR* were  
952 amplified by PCR from *Anabaena* gDNA using primers #36/#37, #39/#40, #41/#42 or #43/#44,  
953 respectively, introducing NdeI and XhoI sites. NdeI and XhoI-digested fragments were then  
954 ligated into pET21a(+) using Quick Ligase (NEB). This procedure yielded plasmids pTHS8,  
955 pTHS9, pTHS10 and pTSH11, respectively.

956 pET21a(+) bearing C-terminal *gfp* translational fusions were generated based on pTHS12  
957 (pET21a(+), P<sub>T7</sub>::*cypS-gfp*). For this, *cypS* was amplified by PCR from *Anabaena* gDNA with  
958 primers 36#/#38, introducing NdeI and SacI sites, and ligated into NdeI and SacI-digested



959 pJET1.2 bearing P<sub>petE</sub>-*gfp*. *cypS-gfp* was excised by NdeI and EcoRI and ligated into NdeI and  
960 EcoRI-digested pET21a(+), generating pTHS12. For pTHS13 (pET21a(+), P<sub>T7</sub>::*ceaR-gfp*),  
961 *ceaR-gfp* was amplified by PCR from pTHS3 using primers #47/#48 and ligated into PCR-  
962 linearized pTHS12 (primers #49/#50) by Gibson assembly.

963 GFP-fragment reassembly plasmids were generated by Gibson assembly. For this aim, *IfiA*  
964 was amplified by PCR from *Anabaena* gDNA with primer 51/52 or 53/54 and ligated into XhoI  
965 and BamHI or NheI digested pET11a-link-NGFP, generating pTHS15 or pTHS16. *IfiB* was  
966 amplified by PCR from *Anabaena* gDNA with primers 55/56 and ligated into NcoI and AatII  
967 digested pMRBAD-link-CGFP, generating pTHS17.

968 Clonings for bacterial two-hybrid plasmids were done using Gibson assembly of PCR-  
969 linearized pKNT25, pKT25, pUT18 or pUT18C plasmids, using primers #57/#58 for pKNT25  
970 and pUT18, primers #59/#60 for pKT25 and primers 61/62 for pUT18C. For each gene, three  
971 primer combinations were used for amplification from *Anabaena* gDNA. The first primer pair  
972 was always used for cloning of the respective gene into pKNT25 and pUT18 while the second  
973 and third primer pairs were used for cloning into pKT25 or pUT18C, respectively: *cypS* (primers  
974 #63/#64, #65/#66 or #67/#68), *IfiA* (primers #69/#70, #71/#72 or #73/#74), *IfiB* (primers  
975 #75/#76, #77/#78 or #79/#80), *ceaR* (primers #81/#82, #83/#84 or #85/#86), *sepJ* (primers  
976 #87/#88, #89/#90 or #91/#92), *ftsZ* (primers #93/#94, #95/#96 or #97/#98), *mreB* (primers  
977 #99/#100, #101/#102 or #103/#104), *fraC* (primers #105/#106, #107/#108 or #109/#110) and  
978 *fraD* (primers #111/#112, #113/#114 or #115/#116). This yielded plasmids pTHS17-pTHS52,  
979 respectively.

980 Like for P<sub>petE</sub>-driven expression, native expression of *Anabaena* CCRPs was mediated from  
981 the pRL25C plasmid. For pTHS56 (pRL25C, P<sub>cypS</sub>::*cypS-gfp*), P<sub>cypS</sub> was amplified from  
982 *Anabaena* gDNA using primers #150/#151 and ligated into BamHI and EcoRI-digested  
983 pRL25C by Gibson assembly together with *cypS-gfp*, which was amplified from pTHS4 using  
984 primers #152/#153.

985 For pTHS57 (pRL25C, P<sub>ceaR</sub>::*ceaR-gfp*), P<sub>ceaR</sub> was amplified from *Anabaena* gDNA using  
986 primers #154/#155 and ligated into BamHI and EcoRI-digested pRL25C by Gibson assembly  
987 together with *ceaR-gfp*, which was amplified from pTHS3 using primers #156/#153.

988 For pTHS58 (pRL25C, P<sub>IfiA</sub>::*IfiA-gfp*), P<sub>IfiA</sub> was amplified from *Anabaena* gDNA using primers  
989 #157/#158 and ligated into BamHI and EcoRI-digested pRL25C by Gibson assembly together  
990 with *IfiA-gfp*, which was amplified from pTHS1 using primers #159/#153.

991 For pTHS59 (pRL25C, P<sub>lfiB</sub>::*lfiB-gfp*), P<sub>lfiB</sub> was amplified from *Anabaena* gDNA using primers  
992 #160/#161 and ligated into BamHI and EcoRI-digested pRL25C by Gibson assembly together  
993 with *lfiB-gfp*, which was amplified from pTHS2 using primers #162/#153.

994 For pTHS60 (pRL25C, P<sub>cypS</sub>::*cypS-his*), P<sub>cypS</sub> was amplified from *Anabaena* gDNA using  
995 primers #150/#151 and ligated into BamHI and EcoRI-digested pRL25C by Gibson assembly  
996 together with *cypS-his*, which was amplified from pTHS8 using primers #152/#163.

997 For pTHS61 (pRL25C, P<sub>ceaR</sub>::*ceaR*), P<sub>ceaR</sub>::*ceaR* was amplified from *Anabaena* gDNA using  
998 primers #154/#164 and ligated into BamHI and EcoRI-digested pRL25C by Gibson assembly.

999 For pTHS58 (pRL25C, P<sub>lfiA/B</sub>::*lfiA-lfiB*), P<sub>lfiA/B</sub>::*lfiA-lfiB* was amplified from *Anabaena* gDNA using  
1000 primers #157/#165 and ligated into BamHI and EcoRI-digested pRL25C by Gibson assembly.

1001

1002 *Anabaena* mutant strain construction

1003 All *Anabaena* mutant strains were generated using the pRL278-based double homologous  
1004 recombination system employing the conditionally lethal *sacB* gene<sup>119</sup>. For this, 1500 bp  
1005 upstream and downstream of the gene to be replaced were generated by PCR from *Anabaena*  
1006 gDNA. Upstream and downstream regions of *cypS* and *ceaR*, were amplified using primers  
1007 #121/#122 and #123/#124 or #125/#126 and #127/#128, respectively. Upstream region of *lfiA*  
1008 was amplified using primers #129/#130 and downstream region of *lfiB* was amplified using  
1009 primers #131/#132. The respective upstream and downstream homology regions flanking the  
1010 CS.3 cassette (amplified with primer #119/#120 from pCSEL24) were then inserted into PCR-  
1011 amplified pRL278 (using primer #117/#118) by Gibson assembly, yielding pTHS55, pTHS56  
1012 and pTHS57, respectively. *Anabaena* transformed with those plasmids was subjected to  
1013 several rounds of re-streaking on new plates (about 5-8 rounds for each strain). To test for fully  
1014 segregated clones, colony PCRs were performed. For this, *Anabaena* cells were resuspended  
1015 in 10 µl sterile H<sub>2</sub>O of which 1 µl was used for standard PCR with internal gene primers #3/#4,  
1016 #5/#6 and #7/#10 for  $\Delta cypS$ ,  $\Delta ceaR$  and  $\Delta lfiA\Delta lfiB$ , respectively. Correct placement of the  
1017 CS.3 cassette was then further confirmed using primers CS.3 cassette primers with primers  
1018 binding outside of the 5' and 3' flanks used for homologous recombination (#137/#118 and  
1019 #117/#138 for  $\Delta cypS$ , #135/#118 and #117/#136 for  $\Delta ceaR$  and #133/#118 and #117/#134 for  
1020  $\Delta lfiA\Delta lfiB$ ).

1021 Growth curve analysis

1022 For analysis of mutant viability, growth curves of *Anabaena* WT and  $\Delta$ *ceaR* mutant strain were  
1023 performed. For this, cells were grown in BG11 liquid medium, washed three times by  
1024 centrifugation (6500 x g, RT, 3 min) in BG11 or BG11<sub>0</sub>, adjusted to an OD<sub>750</sub> of 0.1 and then  
1025 grown in triplicates at standard growth conditions in 15 ml culture volumes. OD<sub>750</sub> values were  
1026 recorded once a day for 24 d.

1027 Fluorescence microscopy

1028 Bacterial strains grown in liquid culture were either directly applied to a microscope slide or  
1029 previously immobilized on a 2% low-melting agarose in PBS (10 mM Na<sub>2</sub>HPO<sub>4</sub>, 140 mM NaCl,  
1030 2.7 mM KCl, 1.8 mM KH<sub>2</sub>PO<sub>4</sub>, pH 7.4) agarose pad and air dried before microscopic analysis.  
1031 Epifluorescence was done using an Axio Imager.M2 light microscope (Carl Zeiss) equipped  
1032 with Plan-Apochromat 63x/1.40 Oil M27 objective and the AxioCam MR R3 imaging device  
1033 (Carl Zeiss). GFP, Alexa Fluor 488 and BODIPY™ FL Vancomycin (Van-FL) fluorescence was  
1034 visualized using filter set 38 (Carl Zeiss; excitation: 470/40 nm band pass (BP) filter; emission:  
1035 525/50 nm BP). Chlorophyll auto-fluorescence was recorded using filter set 15 (Carl Zeiss;  
1036 excitation: 546/12 nm BP; emission: 590 nm long pass). When applicable, cells were previously  
1037 incubated in the dark at RT for about 5 min with 10 µg ml<sup>-1</sup> DAPI (final concentration) to stain  
1038 intracellular DNA. For visualization of DAPI fluorescence filter set 49 (Carl Zeiss; excitation: G  
1039 365 nm; emission: 455/50 nm) was employed. For confocal laser scanning microscopy, the  
1040 LSM 880 Axio Imager 2 equipped with a C-Apochromat 63x/1.2 W Korr M27 objective and an  
1041 Airyscan detector (Carl Zeiss) was used and visualization of GFP, eCFP and chlorophyll auto-  
1042 fluorescence was done using Zen black smart setup settings. Also, to investigate putative  
1043 alterations of the polysaccharide sheath of *Anabaena* mutants, cells were grown on BG11<sub>0</sub>  
1044 agar plates, re-suspended in BG11<sub>0</sub> liquid medium and stained with 0.05% alcian blue (final  
1045 concentration). Polysaccharide staining of *Anabaena* cells immobilized on an agarose pad was  
1046 then observed with an AxioCam ERc 5s color camera (Carl Zeiss). *E. coli* BL21 (DE3) cells  
1047 expressing C-terminally GFP-tagged protein candidates were grown over night in LB and  
1048 then diluted 1:40 in the same medium the following day. Cells were grown for 2 h at 37 °C,  
1049 briefly acclimated to 20 °C for 10 min and induced with 0.05 mM IPTG at 20 °C. Protein  
1050 localization of GFP-tagged proteins was then observed after indicated time points of cells  
1051 immobilized on an agarose pad.

1052 Transmission electron microscopy and sacculi preparation

1053 For ultra-structure analysis, *Anabaena* filaments were fixed with 2.5% glutaraldehyde,  
1054 immobilized in 2% agarose, treated with 2% potassium permanganate and dehydrated through  
1055 a graded ethanol series. The fixed cells were infiltrated by ethanol:EPON (2:1 to 1:2 ratio) and  
1056 embedded in pure EPON. Ultrathin sections were prepared with a Leica UC6i Ultramicrotome,  
1057 transferred to formvar coated copper grids and post-stained with uranyl acetate and lead  
1058 citrate<sup>120</sup>. Micrographs were recorded at a Philips Tecnai10 electron microscope at 80 kV.

1059 Peptidoglycan sacculi were isolated from filaments grown on BG11 agar plates by the method  
1060 of Kühner *et al.*<sup>121</sup> with the following modifications: Cells were sonicated (Branson Sonifier 250;  
1061 duty cycle 50%, output control 1, 2 min) prior to boiling in 0.1 M Tris-HCl pH 6.8 with 3% SDS.  
1062 After incubation in a sonifier waterbath, the samples were incubated with  $\alpha$ -Chymotrypsin (600  
1063  $\mu\text{g ml}^{-1}$ ) at 37 °C over night in 50 mM  $\text{Na}_3\text{PO}_4$  buffer pH 6.8. After inactivation of the enzyme,  
1064 the sample was sonified again and loaded on a formvar/carbon film coated copper grid  
1065 (Science Services GmbH, Munich) and stained with 1 % (w/v) uranyl acetate as described  
1066 previously<sup>122</sup>. Images were taken with a Philips Tecnai10 electron microscope at 80 kV.

1067

1068 Calcein labelling and fluorescence recovery after photobleaching (FRAP) experiments

1069 *Anabaena* WT and mutant strains were either grown on BG11 plates and resuspended in BG11  
1070 or directly taken from liquid cultures, washed several times in BG11, resuspended in 0.5 ml  
1071 BG11 and incubated with 10  $\mu\text{l}$  calcein-AM (1 mg  $\text{ml}^{-1}$  in DMSO). The cells were incubated in  
1072 the dark at 30 °C for 1 hour and then subjected to four washing steps with 1 ml BG11.  
1073 Subsequently, cells were resuspended in a small volume of BG11, spotted on BG11 agar  
1074 plates (1 % w/v) and air dried. Samples were visualized by using an inverted confocal laser  
1075 scanning microscope (Leica TCS SP5) with a x63 oil immersion objective (HCX PL APO 63x  
1076 1.40-0.60 OIL CS). Fluorescence was excited at 488 nm and emission monitored by collecting  
1077 across a window of 500 to 530 nm with a maximally opened pinhole (600  $\mu\text{m}$ ). FRAP  
1078 experiments were carried out by an automated routine as previously described (Mullineaux *et*  
1079 *al.* EMBO). After recording an initial image, selected cells were bleached by increasing the  
1080 laser intensity by a factor of 5 for two subsequent scans and the fluorescence recovery followed  
1081 in 0.5 s intervals for 30 s was recorded using the Leica LAS X software. Exchange coefficients  
1082 ( $E$ ) were then calculated according to Mullineaux *et al.* and Nieves-Mori3n *et al.*<sup>43,101</sup>.

1083 BODIPY™ FL Vancomycin (Van-FL) staining

1084 Van-FL staining of BG11-grown filaments of the *Anabaena* WT and mutant strains was  
1085 essentially performed as previously described by Lehner *et al.*<sup>47</sup> and Rudolf *et al.*<sup>123</sup>. Briefly,  
1086 cells were resuspended in BG11 medium, washed once in BG11 by centrifugation (6500 x *g*,  
1087 4 min, RT) and incubated with 5 µg ml<sup>-1</sup> Van-FL (dissolved in methanol). Cells were incubated  
1088 in the dark for 1 hour at 30 °C, washed three times with BG11 and immobilized on an agarose  
1089 pad. Van-FL fluorescence signals were then visualized using epifluorescence microscopy with  
1090 an excitation time of 130 ms. Arithmetic mean fluorescence intensities were then recorded  
1091 from the septa between two cells with a measured area of 3.52 µm<sup>2</sup> using the histogram option  
1092 of the Zen blue 2.3 software (Carl Zeiss).

1093

1094 Data analysis

1095 Cell length, volume and roundness were determined using the imaging software ImageJ. Cell  
1096 volume was calculated based on the assumption of an elliptic cell shape of *Anabaena* cells  
1097 using the Major Axis and Minor Axis values given by ImageJ and the formula for the volume of  
1098 an ellipse ( $V = \frac{4}{3}\pi abc$ ):

1099 • 
$$V = \frac{4}{3}\pi \left( \left( \frac{Major\ Axis}{2} \right)^2 \frac{Minor\ Axis}{2} \right)$$

1100 Distribution of DAPI fluorescence signals was done in ImageJ with the Plot Profile option along  
1101 151 single cells with rectangle tool. The resulting grey values were arranged according to the  
1102 maximum intensity focus and the width of the DAPI focal area was calculated as the range of  
1103 DAPI staining around the maximum ( $\pm 10$  grey value in arbitrary units).

1104

1105 Bacterial two-hybrid and beta galactosidase assays

1106 Chemically competent *E. coli* BTH101 cells were co-transformed with 5 ng of plasmids carrying  
1107 the respective T18 and T25 translational fusion constructs, plated onto LB plates  
1108 supplemented with 200 µg ml<sup>-1</sup> X-gal, 0.5 mM IPTG, Amp, Km and grown at 30°C for 24-36 h.  
1109 Interactions were quantified by beta-galactosidase assays from three independent colonies.  
1110 For this aim, cultures were either grown over night at 30 °C or for two days at 20 °C in LB Amp,  
1111 Km, 0.5 mM IPTG and beta-galactosidase activity was recorded as described in the  
1112 manufacturer's instructions (Euromedex; BACTH System Kit Bacterial Adenylate Cyclase  
1113 Two-Hybrid System Kit) in a 96 well plate according to Karimova, Davi and Ladant<sup>103</sup>.



1114 GFP-fragment reassembly assay

1115 Chemically competent *E. coli* BL21 (DE3) were co-transformed with indicated plasmid  
1116 combinations, plated on LB Amp, Km and grown over night at 37 °C. Liquid overnight cultures  
1117 of single colonies of the respective plasmid-bearing *E. coli* strains were then diluted 1:40 in the  
1118 same medium the following day. Cells were grown for 2 h at 37 °C, briefly acclimated to 20 °C  
1119 for 10 min and protein expression was induced with 0.05 mM IPTG and 0.2% L-arabinose.  
1120 Pictures of induced cultures grown at 20 °C were taken after 48 h of cells immobilized on an  
1121 agarose pad.

1122

1123 Co-immunoprecipitation

1124 About 20-30 ml of the respective *Anabaena* culture was pelleted by centrifugation (4800 x *g*,  
1125 10 min, RT), cells were washed twice by centrifugation (4800 x *g*, 10 min, RT) with 40 ml PBS  
1126 and then resuspended in 1 ml lysis buffer (PBS-N: PBS supplemented with 1% NP-40)  
1127 supplemented with protease inhibitor cocktail (PIC; cOmplete™, EDTA-free Protease Inhibitor  
1128 Cocktail, Sigma-Aldrich). Cells were lysed using the VK05 lysis kit (Bertin) in a Precellys® 24  
1129 homogenizer (3 strokes for 30 seconds at 6500 rpm) and cell debris was pelleted by  
1130 centrifugation (30 min, 21,100 x *g*, 4 °C). 50 µl µMACS anti-GFP MicroBeads (Miltenyi Biotec)  
1131 was added to the resulting cell-free supernatant and incubated for 1 h at 4 °C with mild rotation.  
1132 Afterwards, the sample was loaded onto µColumns (Miltenyl Biotec), washed two times with 1  
1133 ml lysis buffer and eluted in 50 µl elution Buffer (50 mM Tris HCl pH 6.8, 50 mM DTT, 1% SDS,  
1134 1 mM EDTA, 0.005% bromphenol blue, 10% glycerol; Miltenyl Biotec). Until further use,  
1135 samples were stored at -80 °C.

1136

1137 Mass spectrometry analysis

1138 Coomassie stained gel bands were excised and protein disulfide bonds were reduced with 10  
1139 mM dithiotreitol at 56 °C for 45 min and alkylated with 55 mM iodoacetamide at RT for 30 min  
1140 in the dark. The gel bands were washed 50 mM ammonium bicarbonate and subsequently  
1141 dehydrated with acetonitrile. 10 µl trypsin (5 ng µl<sup>-1</sup> in 25 mM ammonium bicarbonate) were  
1142 added and the gel bands were rehydrated for 5 min at 37 °C. Samples were digested over  
1143 night at 37 °C. Prior to peptide extraction samples were acidified with 10% formic acid. After  
1144 transferring the supernatant into a new Eppendorf tube, 5% formic acid was added to the gel  
1145 bands and incubated for 10 min. Subsequently the samples were sonicated for 1 min in ice-  
1146 cooled water and the supernatant was combined with the one from the step before. Two  
1147 additional extraction steps with 60% acetonitrile/1% formic acid and 100% acetonitrile were

1148 performed in the same manner. The combined supernatants were dried in the SpeedVac and  
1149 the samples were reconstituted in 30  $\mu$ L 3% acetonitrile/0.1% trifluoroacetic acid. LC-MS/MS  
1150 analysis was performed using a Dionex U3000 nanoUHPLC coupled to a Q Exactive Plus  
1151 mass spectrometer (both from Thermo Scientific). The LC-MS/MS parameters were as follows:  
1152 Six microliter were injected and loaded on a trap column (Acclaim Pepmap 100 C18, 10 mm  $\times$   
1153 300  $\mu$ m, 3  $\mu$ m, 100  $\text{\AA}$ , Dionex) and washed for 3 min with 2% ACN/0.05% TFA at a flow-rate  
1154 of 30  $\mu$ L  $\text{min}^{-1}$ . separation was performed using an Acclaim PepMap 100 C18 analytical column  
1155 (50 cm  $\times$  75  $\mu$ m, 2  $\mu$ m, 100  $\text{\AA}$ , Dionex) with a flow-rate of 300 nL/min and following eluents: A  
1156 (0.05% FA) and B (80% ACN/0.04% FA); linear gradient 5-40% B in 60 min, 50-90% B in 5  
1157 min, 90% B for 10 min, 90-5% B in 1 min and equilibrating at 5% B for 11 min. Ionization was  
1158 performed with 1.5 kV spray voltage applied on a non-coated PicoTip emitter (10  $\mu$ m tip size,  
1159 New Objective, Woburn, MA) with the source temperature set to 250°C. MS data were acquired  
1160 from 5 to 85 min with MS full scans between 300 and 1,800 m/z at a resolution of 70,000 at  
1161 m/z 200. The 10 most intense precursors with charge states  $\geq 2+$  were subjected to  
1162 fragmentation with HCD with NCE of 27%; isolation width of 3 m/z; resolution, 17,500 at m/z  
1163 200. Dynamic exclusion for 30 s was applied with a precursor mass tolerance of 10 ppm. Lock  
1164 mass correction was performed based on the polysiloxane contaminant signal of 445.120025  
1165 m/z. Additional wash runs were performed between samples from gel bands to reduce carry  
1166 over while cytochrome C was used to monitor mass accuracy and LC quality control. The  
1167 acquired MS/MS data were searched with the SequestHT algorithm against the entire  
1168 reviewed Uniprot protein database of *Nostoc* sp. PCC 7120 including plasmids (6922  
1169 sequences in total). Static modifications applied were carbamidomethylation on cysteine  
1170 residues, while oxidation on methionine residues was set as dynamic modification. Spectra  
1171 were searched with full enzyme specificity. A MS mass tolerance of 10 ppm and a MS/MS  
1172 tolerance of 0.02 Da was used. Proteins were identified with at least three unique peptides  
1173 with a FDR confidence  $\leq 0.01$  (high).

1174

1175 Immunofluorescence

1176 Immunolocalization of CypS-His and FtsZ in *Anabaena* was essentially performed as  
1177 described by Ramos-León *et al.*<sup>82</sup>. For visualization of FtsZ, *Anabaena* WT and mutant strains  
1178 were streaked from growth plates (BG11 and BG11<sub>0</sub> plates), resuspended in a small volume  
1179 of distilled water and air-dried on Polysine<sup>®</sup> adhesion slides (Menzel) at RT followed by fixation  
1180 and permeabilization with 70% ethanol for 30 min at -20 °C. Cells were allowed to air dry for  
1181 30 min at RT and then washed two times with PBST (PBS supplemented with 0.1% (v/v)  
1182 Tween-20) for 2 min. Unspecific binding sites were blocked for 30 min at RT with blocking  
1183 buffer (1x Roti<sup>®</sup>-ImmunoBlock in PBST; Carl Roth) and afterwards rabbit anti-FtsZ (Agrisera;

1184 1:150 diluted) antibody in blocking buffer was added to the cells and incubated for 1.5 h at RT  
1185 in a self-made humidity chamber followed by five washing steps with PBST. 7.5  $\mu\text{g ml}^{-1}$  Alexa  
1186 Fluor 488-conjugated goat anti-rabbit IgG (H+L) secondary antibody (Thermo Fischer  
1187 Scientific) in blocking buffer was added to the cells and incubated for 1 h at RT in the dark in  
1188 a self-made humidity chamber. Subsequently, cells were washed five times with PBST, air  
1189 dried and mounted with ProLong™ Diamond Antifade Mountant (Thermo Fischer Scientific)  
1190 overnight at 4 °C. Immunolocalization of FtsZ was then analyzed by epifluorescence  
1191 microscopy. Similarly, *in vivo* localization of CypS-His expressed in *Anabaena* was evaluated  
1192 by immunolocalization of BG11<sub>0</sub> grown liquid cultures, induced with 0.25  $\mu\text{M}$  CuSO<sub>4</sub> for two  
1193 days, and compared to *Anabaena* WT cells using mouse anti-His primary antibody (1:500  
1194 diluted; Thermo Fischer Scientific).

1195

#### 1196 Spot assays

1197 Spot assays were essentially performed as described by Dörrich *et al.*<sup>124</sup>. *Anabaena* WT and  
1198 mutant strains were grown on BG11 growth plates, resuspended in BG11 liquid medium and  
1199 adjusted to an OD<sub>750</sub> of 0.4. Cells were then spotted in triplicates of 5  $\mu\text{l}$  onto the respective  
1200 growth plates containing either no additives (BG11 or BG11<sub>0</sub>), 50  $\mu\text{g ml}^{-1}$  Proteinase K or  
1201 100  $\mu\text{g ml}^{-1}$  lysozyme in serial 1/10 dilutions and incubated under standard growth conditions  
1202 until no further colonies arose in the highest dilution.

1203

#### 1204 Protein purification and *in vitro* filamentation assays

1205 For protein purification, *E. coli* BL21 (DE3) cells carrying His-tagged protein candidates were  
1206 grown in overnight cultures at 37 °C and 250 rpm. The next day, overnight cultures were diluted  
1207 1:40 in the same medium and grown at 37 °C until they reached an OD<sub>600</sub> of 0.5-0.6. Protein  
1208 expression was induced with 0.5 mM IPTG for 3-4 h at 37 °C and 250 rpm. Afterwards, cell  
1209 suspensions of 50 ml aliquots were harvested by centrifugation, washed once in PBS and  
1210 stored at -80 °C until further use. For *in vitro* filamentation assays, cell pellets were  
1211 resuspended in urea lysis buffer (ULB: 50 mM NaH<sub>2</sub>PO<sub>4</sub>, 300 mM NaCl, 25 mM imidazole,  
1212 6 M urea; pH 8.0) and lysed in a Precellys® 24 homogenizer (3x 6500 rpm for 30 s) using the  
1213 2 ml microorganism lysis kit (VK01; Bertin) or self-packed Precellys tubes with 0.1 mm glass  
1214 beads. The resulting cell debris was pelleted by centrifugation at 21,000 x g (30 min, 4 °C) and  
1215 the supernatant was incubated with 1 ml HisPur™ Ni-NTA resin (Thermo Fischer Scientific)  
1216 for 1 h at 4°C in an overhead rotator. The resin was washed 5 times with 4x resin-bed volumes  
1217 ULB and eluted in urea elution buffer (UEB: ULB supplemented with 225 mM imidazole). Total

1218 protein concentration was measured using the Qubit® 3.0 Fluorometer (Thermo Fischer  
1219 Scientific) and generally adjusted to 0.5-1.0 mg ml<sup>-1</sup> before dialysis. Filament formation of  
1220 purified proteins was induced by overnight dialysis against polymerization buffer (PLB: 50 mM  
1221 PIPES, 100 mM KCl, pH 7.0; HLB: 25 mM HEPES, 150 mM NaCl, pH 7.4; or 25 mM HEPES  
1222 pH 7.5) at 20 °C and 180 rpm with three bath changes using a Slide-A-Lyzer™ MINI Dialysis  
1223 Device (10K MWCO, 0.5 ml or 2 ml; Thermo Fischer Scientific). Purified proteins were stained  
1224 with an excess of NHS-Fluorescein (dissolved in DMSO; Thermo Fischer Scientific) and  
1225 *in vitro* filamentation was analyzed by epifluorescence microscopy.

1226

#### 1227 **Data availability**

1228 All data generated or analyzed during this study are included in this published article (and its  
1229 supplementary information files). The datasets generated during and/or analyzed during the  
1230 current study are available from the corresponding authors on reasonable request.

1231 **Supplementary Table 2: Cyanobacterial strains used in this study**

| Strain                       | Genotype                                             | Resistance Marker | Source                                            |
|------------------------------|------------------------------------------------------|-------------------|---------------------------------------------------|
| <i>Anabaena</i> sp. PCC 7120 | WT                                                   |                   | Pasteur culture collection of Cyanobacteria (PCC) |
| BLS1                         | <i>Anabaena</i> $\Delta$ cypS::CS.3                  | Sp, Sm            | This study                                        |
| BLS2                         | <i>Anabaena</i> ( $\Delta$ lfiA $\Delta$ lfiB)::CS.3 | Sp, Sm            | This study                                        |
| BLS3                         | <i>Anabaena</i> $\Delta$ ceaR::CS.3                  | Sp, Sm            | This study                                        |

1232 Sp = spectinomycin, Sm = streptomycin

1233 **Supplementary Table 3: *E. coli* strains used in this study**

| Strain           | Genotype                                                                                                                                                                                                                                         | Resistance | Source                                          |
|------------------|--------------------------------------------------------------------------------------------------------------------------------------------------------------------------------------------------------------------------------------------------|------------|-------------------------------------------------|
| DH5 $\alpha$ MCR | F <sup>-</sup> <i>endA1 supE44 thi-1</i> $\lambda$ <sup>-</sup><br><i>recA1 gyrA96 relA1 deoR</i> $\Delta$ ( <i>lacZYA-argF</i> )U169<br>$\Phi$ 80d <i>lacZ</i> $\Delta$ M15 <i>mcrA</i> $\Delta$ ( <i>mrr hsdRMS mcrBC</i> )                    |            | Grant <i>et al.</i> , 1990 <sup>(125)</sup>     |
| BL21 (DE3)       | F <sup>-</sup> <i>ompT gal dcm lon hsdS<sub>B</sub>(r<sub>B</sub><sup>-</sup> m<sub>B</sub><sup>-</sup>)</i> $\lambda$ (DE3 [ <i>lacI lacUV5-T7p07 ind1 sam7 nin5</i> ]) [ <i>malB</i> <sup>+</sup> ] <sub>K-12</sub> ( $\lambda$ <sup>S</sup> ) |            | Studier <i>et al.</i> , 1986 <sup>(126)</sup>   |
| BTH101           | F <sup>-</sup> , <i>cya-99, araD139, galE15, galK16, rpsL1</i> ( <i>Str</i> ),<br><i>hsdR2, mcrA1, mcrB1</i>                                                                                                                                     | Sm         | Euromedex                                       |
| XL1-blue         | <i>endA1 gyrA96(nal<sup>R</sup>) thi-1 recA1 relA1 lac glnV44</i><br>F <sup>'</sup> [ <i>:Tn10 proAB<sup>+</sup> lacI<sup>q</sup> <math>\Delta</math>(lacZ)M15</i> ] <i>hsdR17</i> (r <sub>K</sub> <sup>-</sup> m <sub>K</sub> <sup>+</sup> )    | Tet        | Stratagene                                      |
| HB101            | F <sup>-</sup> <i>mcrB mrr hsdS20(r<sub>B</sub><sup>-</sup> m<sub>B</sub><sup>-</sup>) recA13 leuB6 ara-14</i><br><i>proA2 lacY1 galK2 xyl-5 mtl-1 rpsL20</i> (Sm <sup>R</sup> ) <i>glnV44</i> $\lambda$ <sup>-</sup>                            | Sm         | Boyer & Roulland-Dessoix, 1969 <sup>(127)</sup> |

1234 Tet = tetracycline

1235 **Supplementary Table 4: Plasmids used in this study**

| Name       | Description                                                                                                                                   | Resistance | Source                                     |
|------------|-----------------------------------------------------------------------------------------------------------------------------------------------|------------|--------------------------------------------|
| pET21a(+)  | Bacterial vector for expressing N- terminal T7 and/or C-terminal His6-tagged proteins in <i>E. coli</i>                                       | Amp        | Novagen                                    |
| pRL25C     | Shuttle cosmid vector for cyanobacteria and <i>E. coli</i>                                                                                    | Km, Nm     | Wolk <i>et al.</i> , 1988 <sup>(117)</sup> |
| pRL623     | Methylation plasmid                                                                                                                           | Cm         | Wolk <i>et al.</i> , 1988 <sup>(117)</sup> |
| pRL443     | Conjugation plasmid                                                                                                                           | Amp        | Wolk <i>et al.</i> , 1988 <sup>(117)</sup> |
| pRL278     | Suicide vector used for homologous recombination in cyanobacteria; contains <i>sacB</i> for positive selection of double recombination events | Km, Nm     | Wolk <i>et al.</i> , 1988 <sup>(117)</sup> |
| pKNT25     | P <sub>lac</sub> ::-T25                                                                                                                       | Km         | Euromedex                                  |
| pKT25      | P <sub>lac</sub> ::T25-                                                                                                                       | Km         | Euromedex                                  |
| pUT18      | P <sub>lac</sub> ::-T18                                                                                                                       | Amp        | Euromedex                                  |
| pUT18C     | P <sub>lac</sub> ::T18-                                                                                                                       | Amp        | Euromedex                                  |
| pKT25-zip  | pKT25; P <sub>lac</sub> ::T25-zip                                                                                                             | Km, Nm     | Euromedex                                  |
| pUT18C-zip | pUT18C; P <sub>lac</sub> ::T18-zip                                                                                                            | Amp        | Euromedex                                  |

|                           |                                                                                                                                         |             |                                                   |
|---------------------------|-----------------------------------------------------------------------------------------------------------------------------------------|-------------|---------------------------------------------------|
| pET11a-link-NGFP          | IPTG-inducible expression vector for translational fusion of target gene with a N-terminal <i>gfp</i> fragment in <i>E. coli</i>        | Amp         | Wilson <i>et al.</i> , 2004 <sup>(99)</sup>       |
| pMRBAD-link-CGFP          | L-arabinose-inducible expression vector for translational fusion of target gene with a C-terminal <i>gfp</i> fragment in <i>E. coli</i> | Km          | Wilson <i>et al.</i> , 2004 <sup>(99)</sup>       |
| pAM5084                   | $P_{trc}::ecfp-kaiC$                                                                                                                    | Amp         | Cohen <i>et al.</i> , 2014 <sup>(128)</sup>       |
| pCSEL24                   | Integrates into the <i>nucA-nuiA</i> region of <i>Anabaena</i>                                                                          | Amp, Sm, Sp | Olmedo-Verd <i>et al.</i> , 2006 <sup>(129)</sup> |
| pJET1.2-PpetE- <i>gfp</i> | pJET1.2 vector containing $P_{petE}::gfp^a$                                                                                             | Amp         | Stucken <i>et al.</i> , 2012 <sup>(118)</sup>     |
| pTHS1                     | pRL25C, $P_{petE}::lfiA-gfp$                                                                                                            | Km, Nm      | This study                                        |
| pTHS2                     | pRL25C, $P_{petE}::lfiB-gfp$                                                                                                            | Km, Nm      | This study                                        |
| pTHS3                     | pRL25C, $P_{petE}::ceaR-gfp$                                                                                                            | Km, Nm      | This study                                        |
| pTHS4                     | pRL25C, $P_{petE}::cypS-gfp$                                                                                                            | Km, Nm      | This study                                        |
| pTHS5                     | pRL25C, $P_{petE}::trunc-ceaR-gfp$ (truncated <i>ceaR</i> without the N-terminal transmembrane domain; first 156 base pairs removed)    | Km, Nm      | This study                                        |
| pTHS6                     | pRL25C, $P_{petE}::cypS-his$                                                                                                            | Km, Nm      | This study                                        |
| pTHS7                     | pRL25C, $P_{petE}::lfiA-ecfp^b$ , $P_{petE}::lfiB-gfp$                                                                                  | Km, Nm      | This study                                        |
| pTHS8                     | pET21a(+), $P_{T7}::cypS-his$                                                                                                           | Amp         | This study                                        |
| pTHS9                     | pET21a(+), $P_{T7}::lfiA-his$                                                                                                           | Amp         | This study                                        |
| pTHS10                    | pET21a(+), $P_{T7}::lfiB-his$                                                                                                           | Amp         | This study                                        |
| pTHS11                    | pET21a(+), $P_{T7}::ceaR-his$                                                                                                           | Amp         | This study                                        |
| pTHS12                    | pET21a(+); $P_{T7}::cypS-gfp$                                                                                                           | Amp         | This study                                        |
| pTHS13                    | pET21a(+), $P_{T7}::ceaR-gfp$                                                                                                           | Amp         | This study                                        |
| pTHS14                    | pET11a-link-NGFP, $P_{T7}::ngfp-lfiA$                                                                                                   | Amp         | This study                                        |
| pTHS15                    | pET11a-link-NGFP, $P_{T7}::lfiA-ngfp$                                                                                                   | Amp         | This study                                        |
| pTHS16                    | pMRBAD-link-CGFP, $P_{ara}::lfiB-cgfp$                                                                                                  | Km          | This study                                        |
| pTHS17                    | pKNT25, $P_{lac}::cypS-T25$                                                                                                             | Km, Nm      | This study                                        |
| pTHS18                    | pKT25, $P_{lac}::T25-cypS$                                                                                                              | Km, Nm      | This study                                        |
| pTHS19                    | pUT18, $P_{lac}::cypS-T18$                                                                                                              | Amp         | This study                                        |
| pTHS20                    | pUT18C, $P_{lac}::T18-cypS$                                                                                                             | Amp         | This study                                        |
| pTHS21                    | pKNT25, $P_{lac}::lfiA-T25$                                                                                                             | Km, Nm      | This study                                        |
| pTHS22                    | pKT25, $P_{lac}::T25-lfiA$                                                                                                              | Km, Nm      | This study                                        |
| pTHS23                    | pUT18, $P_{lac}::lfiA-T18$                                                                                                              | Amp         | This study                                        |
| pTHS24                    | pUT18C, $P_{lac}::T18-lfiA$                                                                                                             | Amp         | This study                                        |
| pTHS25                    | pKNT25, $P_{lac}::lfiB-T25$                                                                                                             | Km, Nm      | This study                                        |
| pTHS26                    | pKT25, $P_{lac}::T25-lfiB$                                                                                                              | Km, Nm      | This study                                        |
| pTHS27                    | pUT18, $P_{lac}::lfiB-T18$                                                                                                              | Amp         | This study                                        |
| pTHS28                    | pUT18C, $P_{lac}::T18-lfiB$                                                                                                             | Amp         | This study                                        |
| pTHS29                    | pKNT25, $P_{lac}::ceaR-T25$                                                                                                             | Km, Nm      | This study                                        |
| pTHS30                    | pKT25, $P_{lac}::T25-ceaR$                                                                                                              | Km, Nm      | This study                                        |
| pTHS31                    | pUT18, $P_{lac}::ceaR-T18$                                                                                                              | Amp         | This study                                        |



|        |                                                                                                                     |                |            |
|--------|---------------------------------------------------------------------------------------------------------------------|----------------|------------|
| pTHS32 | pUT18C, P <sub>lac</sub> :: <i>T18-ceaR</i>                                                                         | Amp            | This study |
| pTHS33 | pKNT25, P <sub>lac</sub> :: <i>sepJ-T25</i>                                                                         | Km, Nm         | This study |
| pTHS34 | pKT25, P <sub>lac</sub> :: <i>T25-sepJ</i>                                                                          | Km, Nm         | This study |
| pTHS35 | pUT18, P <sub>lac</sub> :: <i>sepJ-T18</i>                                                                          | Amp            | This study |
| pTHS36 | pUT18C, P <sub>lac</sub> :: <i>T18-sepJ</i>                                                                         | Amp            | This study |
| pTHS37 | pKNT25, P <sub>lac</sub> :: <i>ftsZ-T25</i>                                                                         | Km, Nm         | This study |
| pTHS38 | pKT25, P <sub>lac</sub> :: <i>T25-ftsZ</i>                                                                          | Km, Nm         | This study |
| pTHS39 | pUT18, P <sub>lac</sub> :: <i>ftsZ-T18</i>                                                                          | Amp            | This study |
| pTHS40 | pUT18C, P <sub>lac</sub> :: <i>T18-ftsZ</i>                                                                         | Amp            | This study |
| pTHS41 | pKNT25, P <sub>lac</sub> :: <i>mreB-T25</i>                                                                         | Km, Nm         | This study |
| pTHS42 | pKT25, P <sub>lac</sub> :: <i>T25-mreB</i>                                                                          | Km, Nm         | This study |
| pTHS43 | pUT18, P <sub>lac</sub> :: <i>mreB-T18</i>                                                                          | Amp            | This study |
| pTHS44 | pUT18C, P <sub>lac</sub> :: <i>T18-mreB</i>                                                                         | Amp            | This study |
| pTHS45 | pKNT25, P <sub>lac</sub> :: <i>fraC-T25</i>                                                                         | Km, Nm         | This study |
| pTHS46 | pKT25, P <sub>lac</sub> :: <i>T25-fraC</i>                                                                          | Km, Nm         | This study |
| pTHS47 | pUT18, P <sub>lac</sub> :: <i>fraC-T18</i>                                                                          | Amp            | This study |
| pTHS48 | pUT18C, P <sub>lac</sub> :: <i>T18-fraC</i>                                                                         | Amp            | This study |
| pTHS49 | pKNT25, P <sub>lac</sub> :: <i>fraD-T25</i>                                                                         | Km, Nm         | This study |
| pTHS50 | pKT25, P <sub>lac</sub> :: <i>T25-fraD</i>                                                                          | Km, Nm         | This study |
| pTHS51 | pUT18, P <sub>lac</sub> :: <i>fraD-T18</i>                                                                          | Amp            | This study |
| pTHS52 | pUT18C, P <sub>lac</sub> :: <i>T18-fraD</i>                                                                         | Amp            | This study |
| pTHS53 | pRL278 containing 1500 bp upstream and downstream of <i>cypS</i> flanking the CS.3 cassette                         | Nm, Km, Sm, Sp | This study |
| pTHS54 | pRL278 containing 1500 bp upstream and downstream of <i>ceaR</i> flanking the CS.3 cassette                         | Nm, Km, Sm, Sp | This study |
| pTHS55 | pRL278, containing 1500 bp upstream of <i>lfiA</i> and 1500 bp downstream of <i>lfiB</i> flanking the CS.3 cassette | Nm, Km, Sm, Sp | This study |
| pTHS56 | pRL25C, P <sub>cypS</sub> :: <i>cypS-gfp</i>                                                                        | Nm, Km,        | This study |
| pTHS57 | pRL25C, P <sub>ceaR</sub> :: <i>ceaR-gfp</i>                                                                        | Nm, Km,        | This study |
| pTHS58 | pRL25C, P <sub>lfiA</sub> :: <i>lfiA-gfp</i>                                                                        | Nm, Km,        | This study |
| pTHS59 | pRL25C, P <sub>lfiB</sub> :: <i>lfiB-gfp</i>                                                                        | Nm, Km,        | This study |
| pTHS60 | pRL25C, P <sub>cypS</sub> :: <i>cypS-his</i>                                                                        | Nm, Km,        | This study |
| pTHS61 | pRL25C, P <sub>ceaR</sub> :: <i>ceaR</i>                                                                            | Nm, Km,        | This study |
| pTHS62 | pRL25C, P <sub>lfiA/B</sub> :: <i>lfiA-lfiB</i>                                                                     | Nm, Km,        | This study |

1236 Km = kanamycin, Nm = neomycin, Amp = ampicillin; Cm = chloramphenicol

- 1237
- 1238
- 1239
- 1240
- 1241
- 1242
- a) Modified *gfpmut3.1*<sup>118</sup> in which the internal NdeI site was removed by replacing CAT by the synonymous CAC codon. The GFP is N-terminally preceded by 12 alanine and serine residues. Abbreviated: *gfp*.
  - b) eCFP from Cohen *et al.* (2014)<sup>128</sup> was adjusted for C-terminal translational fusion instead of N-terminal fusion. For this, a N-terminal Myc sequences followed by a seven amino acid linker (GSGSGSG) and an additional stop codon at the C-terminus were added.

1243 **Supplementary Table 5: Oligonucleotides used in this study**

| #  | Given name           | Sequence (5' - > 3')                                         |
|----|----------------------|--------------------------------------------------------------|
| 1  | rnpB_intern_A        | TGCTGGATAACGTCCAGTGC                                         |
| 2  | rnpB_intern_B        | GGTTTACCGAGCCAGTACCTC                                        |
| 3  | Nos295_intern_A      | CAAAGTCAGGCGATGAGTGA                                         |
| 4  | Nos295_intern_B      | GGAACCGCATTACCAGAAGT                                         |
| 5  | Nos842_intern_A      | TCGGGCAGAAATTACCCAGT                                         |
| 6  | Nos842_intern_B      | TGCCATTCTTCAGGCAAAGC                                         |
| 7  | Nos903_intern_A      | TCAGCTAGACGTAAAGAGTGGC                                       |
| 8  | Nos903_intern_B      | TAATTCTGCTGGGAATGCAGC                                        |
| 9  | Nos904_intern_A      | TGGAATTAGCGAAGGGGTGG                                         |
| 10 | Nos904_intern_B      | TGTTCATAGCCATCTGTTGCCA                                       |
| 11 | petE_903_Fwd         | GAGATTATCAAAAAGGATCCCAGTACTCAGAATTTTTTGGCTGAGGTAC<br>T       |
| 12 | petE_903_Rev         | TTGAGTGCAACTGTCGTTCATGGCGTTCTCCTAACCTGTAGTTTTATTT<br>TT      |
| 13 | pRL25-<br>Nos903_Fwd | CTACAGGTTAGGAGAACGCCATGACGACAGTTGCACTCAAAGATAG               |
| 14 | pRL25-<br>Nos903_Rev | GCACTAGCAGATGCACTAGCTTTAGCCGTAGAACTATCAAAAAGCTCT<br>CATTGC   |
| 15 | GFP_903_Fwd          | TTGATAGTTCTACGGCTAAAGCTAGTGCATCTGCTAGTGCTAGT                 |
| 16 | GFP_903_Rev          | CTTTCGTCTTCAAGAATTCTTTATTTGTATAGTTCATCCATGCCATGTG<br>TAATCC  |
| 17 | pRL25c-<br>903_V_F   | TGGATGAActATACAAATAAAGAATTCTTGAAGACGAAAGGGCC                 |
| 18 | pRL25c-<br>903_V_R   | GCAAAAAATTCTGAGTACTGGGATCCTTTTGATAATCTCATGACCAA<br>AATCC     |
| 19 | Nos904-2A            | CTACAGGTTAGGAGAACGCCATGGCAGTCAAAAAGTTAACAGACAAA<br>AAC       |
| 20 | Nos904_2B            | GCACTAGCAGATGCACTAGCTTTATTTTTCACTTGACTTTTTGCCTGT<br>TCTAAAGC |
| 21 | Nos842_2A            | TACAGGTTAGGAGAACGCCATGCAACAAGTCATAGTAAGTAATCGAT<br>T         |
| 22 | Nos842_2B            | CACTAGCAGATGCACTAGCGGATGCGTATCTAGCTATTAGATGTTCC              |
| 23 | pRL25c_NEB_F<br>wd   | GCTAGTGCATCTGCTAGTGCTAGTG                                    |
| 24 | pRL25c_NEB_R<br>ev   | GGCGTTCTCCTAACCTGTAGTTTTATTTTTCT                             |
| 25 | Nos295His_2A         | TACAGGTTAGGAGAACGCCATGCTGTATTTAGCAGAAGTACAAAAG               |
| 26 | Nos295His_2B         | CTTTTCGTCTTCAAGAATTCTTCAGTGGTGGTGGTGGTGG                     |
| 27 | MBP7_1A              | AGAATTCTTGAAGACGAAAGGGCC                                     |
| 28 | petE_2A              | ACTACCGCATTAAAGCTTATCAGTACTCAGAATTTTTTGGCTGAGGTAC            |
| 29 | Nos903_2B            | TTTCGTGATAAGCTTCTGTTCTTTAGCCGTAGAACTATCAAAAAGCTCT<br>C       |
| 30 | Linker_eCFP_3<br>A   | GGCTCTGGATCGGGTTCAGGAATGGTGAGCAAGGGCGAG                      |
| 31 | eCFP_3B              | CTGCTGCTTACTTGTACAGCTCGTCCATGCC                              |

|    |                   |                                                                  |
|----|-------------------|------------------------------------------------------------------|
| 32 | MYC_Linker_3A2    | GAACAGAAGCTTATCAGCGAAGAAGATCTGGGCTCTGGATCGGGTTCAG                |
| 33 | eCFP_3B2          | TCATGTTTGACAGCTTATCATTACTTGTACAGCTCGTCCATGCC                     |
| 34 | petE_BamHI_2A     | TTGGTCATGAGATTATCAAAAAGCAGTACTCAGAATTTTTTGCTGAGG                 |
| 35 | GFP_BamHI_2B      | ATTGATTTAAACTTCATTTTAAATTTAAAAGTTATTTGTATAGTTCATC<br>CATGCCATGTG |
| 36 | Nos295_NdeI_Fwd   | GCTACATATGCTGTATTTAGCAGAAGTACAAA                                 |
| 37 | Nos295_XhoI_w/o_R | GCTACTCGAGAGATGCCAACAACTCAGG                                     |
| 38 | Nos295_SacI_w/o_R | GCTAGAGCTCAGATGCCAACAACTCAGG                                     |
| 39 | Nos903_NdeI_F     | GCTACATATGACGACAGTTGCACTCA                                       |
| 40 | Nos903_XhoI_R_w/o | GCTACTCGAGTTTAGCCGTAGAAGTATCAAAAAGC                              |
| 41 | Nos904_NdeI_F     | GCTACATATGCGAGTCAAAAAGTTAACAGAC                                  |
| 42 | Nos904_XhoI_w/o_R | GCTACTCGAGTTTATTTTTCACTTGACTTTTTGCCT                             |
| 43 | Nos842_NdeI_F     | GCTACATATGCAACAAGTCATAGTAAGTAATCG                                |
| 44 | Nos842_XhoI_w/o_R | GCTACTCGAGGGATGCGTATCTAGCTATTAGATG                               |
| 45 | Nos903_pET_2A     | GTTTAACTTTAAAGAAGGAGATATACATATGACGACAGTTGCACTCAA<br>AG           |
| 46 | Nos904_pET_2A     | GTTTAACTTTAAAGAAGGAGATATACATATGGCAGTCAAAAAGTTAAC<br>AG           |
| 47 | Nos842_pET_2A     | GTTTAACTTTAAAGAAGGAGATATACATATGCAACAAGTCATAGTAAG<br>TAAATCG      |
| 48 | GFP_pET21a_2B     | AGTGGTGGTGGTGGTGGTGGTGGTGGTGGTGGTGGTGGTGGTGGTGGT<br>ATC          |
| 49 | pET21a_1A         | CACCACCACCACCACCAC                                               |
| 50 | pET21a_1B         | ATGTATATCTCCTTCTTAAAGTTAAACAAAATTTCTAGAGG                        |
| 51 | 903_split_A       | AAGGTGGCTCTGGCTCTGGCTCGAGCATGACGACAGTTGCACTCAA<br>AG             |
| 52 | 903_split_B       | CGGGCTTTGTTAGCAGCCGTTATTTAGCCGTAGAAGTATCAAAAAGCT<br>CTC          |
| 53 | 903_split_A2      | TTAACTTTAAGAAGGAGATATACATATGACGACAGTTGCACTCAAAG                  |
| 54 | 903_split_B2      | CCATGGTGTATGGTGGTGTATGAGATGCACTAGCTTTAGCCGTAGAAG<br>TCAAAAAGCTCT |
| 55 | 904_split_A       | TTTAACTTTAAGAAGGAGATATACCATGGCAGTCAAAAAGTTAACAG<br>ACA           |
| 56 | 904_split_B       | TTACCGCTTCCACCCGACGTTTTATTTTTCACTTGACTTTTTGCCTGT<br>TCC          |
| 57 | N-term_1A         | GAGGATCCCCGGGTACC                                                |
| 58 | N-term_1B         | TAGAGTCGACCTGCAGGCA                                              |
| 59 | pKT25_1A          | CCCCGGGTACCTAAGTAAGTAAG                                          |
| 60 | pKT25_1B          | ATCCTCTAGAGTCGACCCTGC                                            |
| 61 | pUT18C_1A         | CCGAGCTCGAATTCATCGAT                                             |
| 62 | pUT18C_1B         | TACCCGGGGATCCTCTAGAGT                                            |
| 63 | MB_5A             | TGCCTGCAGGTGCACTCTAATGCTGTATTTAGCAGAAGTACAAAAG                   |
| 64 | MB_5B             | TCGGTACCCGGGGATCCTCAGATGCCAACAACTCAGGC                           |
| 65 | MB_6A             | AGGGTCGACTCTAGAGGATATGCTGTATTTAGCAGAAGTACAAAAGC                  |
| 66 | MB_6B             | CTTACTTAGGTACCCGGGGAGATGCCAACAACTCAGGC                           |
| 67 | MB_8A             | TCTAGAGGATCCCCGGGTAAATGCTGTATTTAGCAGAAGTACAAAAG                  |

|     |        |                                                               |
|-----|--------|---------------------------------------------------------------|
| 68  | MB_8B  | TCGATGAATTCGAGCTCGGAGATGCCAACAACCTCAGGC                       |
| 69  | MB_17A | TGCCTGCAGGTCGACTCTAATGACGACAGTTGCACTCAAAG                     |
| 70  | MB_17B | TCGGTACCCGGGGATCCTCTTTAGCCGTAGAACTATCAAAGCTCTC                |
| 71  | MB_18A | AGGGTCGACTCTAGAGGATATGACGACAGTTGCACTCAAAG                     |
| 72  | MB_18B | CTTACTTAGGTACCCGGGGTTTAGCCGTAGAACTATCAAAGCTCTC                |
| 73  | MB_20A | TCTAGAGGATCCCCGGGTAATGACGACAGTTGCACTCAAAG                     |
| 74  | MB_20B | TCGATGAATTCGAGCTCGGTTTAGCCGTAGAACTATCAAAGCTCTC                |
| 75  | MB_21A | TGCCTGCAGGTCGACTCTAATGGCAGTCAAAAAGTTAACAGACAA                 |
| 76  | MB_21B | TCGGTACCCGGGGATCCTCTTTATTTTTCACTTGACTTTTTGCCTGTT<br>C         |
| 77  | MB_22A | AGGGTCGACTCTAGAGGATATGGCAGTCAAAAAGTTAACAGACAA                 |
| 78  | MB_22B | CTTACTTAGGTACCCGGGGTTATTTTTCACTTGACTTTTTGCCTGTT<br>C          |
| 79  | MB_24A | TCTAGAGGATCCCCGGGTAATGGCAGTCAAAAAGTTAACAGACAA                 |
| 80  | MB_24B | TCGATGAATTCGAGCTCGGTTTATTTTTCACTTGACTTTTTGCCTGTT<br>C         |
| 81  | MB_25A | TGCCTGCAGGTCGACTCTAATGCAACAAGTCATAGTAAGTAATCGAT               |
| 82  | MB_25B | TCGGTACCCGGGGATCCTCGGATGCGTATCTAGCTATTAGATGTTT                |
| 83  | MB_26A | AGGGTCGACTCTAGAGGATATGCAACAAGTCATAGTAAGTAATCGAT               |
| 84  | MB_26B | CTTACTTAGGTACCCGGGGGATGCGTATCTAGCTATTAGATGTTT                 |
| 85  | MB_28A | TCTAGAGGATCCCCGGGTAATGCAACAAGTCATAGTAAGTAATCGAT               |
| 86  | MB_28B | TCGATGAATTCGAGCTCGGGGATGCGTATCTAGCTATTAGATGTTT                |
| 87  | MB_41A | TGCCTGCAGGTCGACTCTAATGGGGCGATTTGAGAAGC                        |
| 88  | MB_41B | TCGGTACCCGGGGATCCTCACCTTCTGCATTGGCAGG                         |
| 89  | MB_42A | AGGGTCGACTCTAGAGGATATGGGGCGATTTGAGAAGC                        |
| 90  | MB_42B | CTTACTTAGGTACCCGGGGACCTTCTGCATTGGCAGG                         |
| 91  | MB_44A | TCTAGAGGATCCCCGGGTAATGGGGCGATTTGAGAAGC                        |
| 92  | MB_44B | TCGATGAATTCGAGCTCGGACCTTCTGCATTGGCAGG                         |
| 93  | MB_49A | ATGCCTGCAGGTCGACTCTAATGACACTTGATAATAACCAAGAGCTT<br>ACC        |
| 94  | MB_49B | CTCGGTACCCGGGGATCCTCATTTTTTGGGTGGTCGCCGTC                     |
| 95  | MB_50A | CAGGGTCGACTCTAGAGGATATGACACTTGATAATAACCAAGAGCTT<br>ACC        |
| 96  | MB_50B | TACTTACTTAGGTACCCGGGGATTTTTGGGTGGTCGCCGTC                     |
| 97  | MB_52A | CTCTAGAGGATCCCCGGGTAATGACACTTGATAATAACCAAGAGCTT<br>ACC        |
| 98  | MB_52B | TATATCGATGAATTCGAGCTCGGATTTTTGGGTGGTCGCCGTC                   |
| 99  | MB_53A | ATGCCTGCAGGTCGACTCTAATGGGGCTTTTTAGGAACTTTTCG                  |
| 100 | MB_53B | CTCGGTACCCGGGGATCCTCCATATTTTCGAGATCGTCCGCTAAAAAC              |
| 101 | MB_54A | CAGGGTCGACTCTAGAGGATATGGGGCTTTTTAGGAACTTTTCG                  |
| 102 | MB_54B | TACTTACTTAGGTACCCGGGGCATATTTTCGAGATCGTCCGCTAAAA<br>C          |
| 103 | MB_56A | CTCTAGAGGATCCCCGGGTAATGGGGCTTTTTAGGAACTTTTCG                  |
| 104 | MB_56B | TATATCGATGAATTCGAGCTCGGCATATTTTCGAGATCGTCCGCTAAA<br>AAC       |
| 105 | MB_69A | ATGCCTGCAGGTCGACTCTAATGTTTGAAGATTTGACTATACCCAGG               |
| 106 | MB_69B | CTCGGTACCCGGGGATCCTCCCTATTACGTATCAATAAAATAATAGTT<br>ATAGCGGTG |
| 107 | MB_70A | CAGGGTCGACTCTAGAGGATATGTTTGAAGATTTGACTATACCCAGG               |

|     |                    |                                                                      |
|-----|--------------------|----------------------------------------------------------------------|
| 108 | MB_70B             | TACTTACTTAGGTACCCGGGGCCTATTACGTATCAATAAAATAATAGT<br>TATAGCGGTG       |
| 109 | MB_72A             | CTCTAGAGGATCCCCGGGTAATGTTTGAAGATTTGACTATACCCAGG                      |
| 110 | MB_72B             | ATATCGATGAATTCGAGCTCGGCCTATTACGTATCAATAAAATAATAG<br>TTATAGCGGTG      |
| 111 | MB_73A             | ATGCCTGCAGGTCGACTCTAGTGAATTTATTATTTAAAGACCTTTTCG<br>GAATATT          |
| 112 | MB_73B             | CTCGGTACCCGGGGATCCTCCTGCTGCGGTGGCGCTG                                |
| 113 | MB_74A             | GGGTCGACTCTAGAGGATGTGAATTTATTATTTAAAGACCTTTTCGGA<br>AT               |
| 114 | MB_74B             | TACTTACTTAGGTACCCGGGGCTGCTGCGGTGGCGCTG                               |
| 115 | MB_76A             | CTAGAGGATCCCCGGGTAGTGAATTTATTATTTAAAGACCTTTTCGGA<br>AT               |
| 116 | MB_76B             | TATATCGATGAATTCGAGCTCGGCTGCTGCGGTGGCGCTG                             |
| 117 | pRL271_Fwd         | GAGCTCGCGAAAGCTTGCATG                                                |
| 118 | pRL271_Rev         | CTCGAGATCTAGATATCGAATTTCTGCCAT                                       |
| 119 | CS.3_Fwd           | GATCCGTGCACAGCACCTTG                                                 |
| 120 | CS.3_Rev           | TTATTTGCCGACTACCTTGGTGATCT                                           |
| 121 | 295KO_2A           | ATTCGATATCTAGATCTCGAGACTCAACATAATCATCGGTATATACCG<br>AAAT             |
| 122 | 295KO_2B           | CAAGGTGCTGTGCACGGATCACCGTTCTTCTCTTGTGTACTTGA                         |
| 123 | 295KO_4A           | CCAAGGTAGTCGGCAAATAACAATTCAAAATTCAAAATTCAAAATATT<br>TAGGACTTACG      |
| 124 | 295KO_4B           | ATGCAAGCTTTCGCGAGCTCTGTAAATTTCTCACTAAGTGATGGATC<br>AACACT            |
| 125 | 842KO_2A           | ATTCGATATCTAGATCTCGAGATGGATAATCCAGCAATGTCCGGC                        |
| 126 | 842KO_2B           | AAGGTGCTGTGCACGGATCATTGCTGATTTTTAGCGTAGTTAAGCTT<br>T                 |
| 127 | 842KO_4A           | CAAGGTAGTCGGCAAATAAAATTTAATATCCCTAGCTCATCGTAAAAT<br>TTTTATAAAAATATG  |
| 128 | 842KO_4B           | ATGCAAGCTTTCGCGAGCTCTTTAAACTAGAACTATGAACTAGCTC<br>GCTAAAC            |
| 129 | 903KO_2A           | ATTCGATATCTAGATCTCGAGAAGCAACGGCAACGCC                                |
| 130 | 903KO_2B           | AAGGTGCTGTGCACGGATCATTCAACTCCCTTGATTAGATAATGATT<br>AATCGAG           |
| 131 | 904KO_4A           | CAAGGTAGTCGGCAAATAAAATACAAATAATAAAAATAAATAAAAAGA<br>CGTAACGAAAATTACG |
| 132 | 904KO_4B           | TGCAAGCTTTCGCGAGCTCGTAGTGGGTTTCGCACAAGCTATC                          |
| 133 | 903KO_Seq_A        | TGCGAATTCAGTAGGTCTTGGTAA                                             |
| 134 | 904KO_Seq_B        | GGTGGCGCAGAAGTATTTTTG                                                |
| 135 | 842KO_Seq_A        | TCAACAGTCAACAGTCAATAGTGAAGG                                          |
| 136 | 842KO_Seq_B        | TTCATCTACACCGATATCTTGACCC                                            |
| 137 | 295KO_Seq_A        | GCCATCCTAGCTCTGATTTGATC                                              |
| 138 | 295KO_Seq_B        | CAGGGTTATCGGTAAGGAATCG                                               |
| 139 | Fragment1.FOR      | GATTTCGAACCCGGGGTACCACCTGTAGAGAAGAGTCCCTGAATATC<br>AA                |
| 140 | Fragment1.REV      | TTTTTCGTATTTTCCCTCATTGAATTAATCTCCTACTTGACTTTATGAG<br>TTGGGA          |
| 141 | Fragment4.FOR      | TGGATGAACTATACAAATAAACCGGTGTTTGGATTGTCCG                             |
| 142 | Fragment4.REV      | CCCTGCAGGTCGAGGAATTCGCTGTCTGAAGTTGAACATCAGTAAGC                      |
| 143 | Nos903_pIGA_2<br>A | TAAAGTCAAGTAGGAGATTAATTCATGACGACAGTTGCACTCAAAG                       |
| 144 | Fragment3.FOR      | ATTTAATGACTGCCTTAGTCGCTAGTGCATCTGCTAGTGCTAGT                         |

|     |                       |                                                              |
|-----|-----------------------|--------------------------------------------------------------|
| 145 | Fragment3.REV         | CCGACAATCCAAACACCGGTTTTATTTGTATAGTTCATCCATGCCATGT<br>GTAATCC |
| 146 | Vector.FOR            | TGATGTTCAACTTCGACAGCGAATTCCTCGACCTGCAGGG                     |
| 147 | Vector.REV            | AGGGACTCTTCTCTACAGGTGGTACCCCGGGTTCGAAATCG                    |
| 148 | 842_petE_F            | CTACAGGTTAGGAGAACGCCATGGATAAGCGACGGAGGAAT                    |
| 149 | petE_842_R            | CTCCGTCGCTTATCCATGGCGTTCTCCTAACCTGTAGTTTTATTTTTTC<br>T       |
| 150 | p295_25C_long<br>_A   | TTTTGGTCATGAGATTATCAAAAAGATTGACGCAGCATGGC                    |
| 151 | pNos295_Rev           | ACCGTTCTTCCTCTTGTGTACT                                       |
| 152 | Nos295_pNos2<br>95_A  | CACAAGAGGAAGAACGGTGTGCTGTATTTAGCAGAAGTACAAAAG                |
| 153 | GFP_25C_R             | AGGCCCTTTCGTCTTCAAGTTATTTGTATAGTTCATCCATGCCATGTG<br>T        |
| 154 | p842_25C_long<br>_A   | TTTTGGTCATGAGATTATCAAAAAGTCTCTCTATCCCAAGTACAATT<br>TCTCC     |
| 155 | pNos842_2B            | CTTGTTGCATATTGCTGATTTTTAGCG                                  |
| 156 | Nos842_pNos8<br>42_3A | AATCAGCAATATGCAACAAGTCATAGTAAGTAATCGATTTATTTTAG              |
| 157 | p903_25C_long<br>_A   | TTTTGGTCATGAGATTATCAAAAAGACCCGACACTCTTGAGG                   |
| 158 | pNos903_2B            | ACTGTCGTCATATTTCAACTCCCTTG                                   |
| 159 | Nos903_pNos9<br>03_3A | GGAGTTGAAATATGACGACAGTTGCACTCAAAG                            |
| 160 | pNos904_25C_<br>_F    | ATTTTGGTCATGAGATTATCAAAAAGAGAAATATCAGCTAGACGTAAA<br>GAGTGG   |
| 161 | pNos904_2B            | TGACTGCCATAAAAACCTCTATTTATTGC                                |
| 162 | Nos904_pNos9<br>04_3A | AGAGGTTTTTATGGCAGTCAAAAAGTTAACAGACAAAAAC                     |
| 163 | 295_His_25C_R         | GGCCCTTTCGTCTTCAAGTTAGTGGTGATGGTGATGATGAGATGC                |
| 164 | Nos842_25C_B          | GAGGCCCTTTCGTCTTCAAGTCAGGATGCGTATCTAGCTATTAGATG              |
| 165 | Nos904_25C_B<br>a     | GGCCCTTTCGTCTTCAAGTTATTTATTTTTCACTTGACTTTTTGCCTGT            |

1244 Employed enzymatic cut sites are underlined.



1245 **References**

- 1246 1. Shapiro, J. A. Thinking about bacterial populations as multicellular organisms. *Annu.*  
1247 *Rev. Microbiol.* **52**, 81–104 (1998).
- 1248 2. Lyons, N. A. & Kolter, R. On the evolution of bacterial multicellularity. *Curr. Opin.*  
1249 *Microbiol.* **24**, 21–28 (2015).
- 1250 3. Claessen, D., Rozen, D. E., Kuipers, O. P., Søgaard-Andersen, L. & Van Wezel, G. P.  
1251 Bacterial solutions to multicellularity: A tale of biofilms, filaments and fruiting bodies.  
1252 *Nat. Rev. Microbiol.* **12**, 115–124 (2014).
- 1253 4. Smith, W. P. J. *et al.* Cell morphology drives spatial patterning in microbial communities.  
1254 *Proc. Natl. Acad. Sci.* **114**, E280–E286 (2017).
- 1255 5. Lin, T.-Y., Santos, T. M. A., Kontur, W. S., Donohue, T. J. & Weibel, D. B. A Cardiolipin-  
1256 Deficient Mutant of *Rhodobacter sphaeroides* Has an Altered Cell Shape and Is  
1257 Impaired in Biofilm Formation. *J. Bacteriol.* **197**, 3446–3455 (2015).
- 1258 6. Lam, H. *et al.* D-amino acids govern stationary phase cell wall remodeling in bacteria.  
1259 *Science* **325**, 1552–1555 (2009).
- 1260 7. Kolodkin-Gal, I. *et al.* D-amino acids trigger biofilm disassembly. *Science* **328**, 627–629  
1261 (2010).
- 1262 8. Typas, A. *et al.* Regulation of peptidoglycan synthesis by outer-membrane proteins. *Cell*  
1263 **143**, 1097–1109 (2010).
- 1264 9. Reichenbach, H. The ecology of the myxobacteria. *Environ. Microbiol.* **1**, 15–21 (1999).
- 1265 10. Flärdh, K., Richards, D. M., Hempel, A. M., Howard, M. & Buttner, M. J. Regulation of  
1266 apical growth and hyphal branching in *Streptomyces*. *Curr. Opin. Microbiol.* **15**, 737–  
1267 743 (2012).
- 1268 11. Flores, E. & Herrero, A. Compartmentalized function through cell differentiation in  
1269 filamentous cyanobacteria. *Nat. Rev. Microbiol.* **8**, 39–50 (2010).
- 1270 12. Rossetti, V. & Bagheri, H. C. Advantages of the division of labour for the long-term  
1271 population dynamics of cyanobacteria at different latitudes. *Proceedings. Biol. Sci.* **279**,  
1272 3457–3466 (2012).
- 1273 13. Fuchs, E. & Weber, K. INTERMEDIATE FILAMENTS: Structure, Dynamics, Function  
1274 and Disease. *Annu. Rev. Biochem.* **63**, 345–382 (1994).
- 1275 14. Köster, S., Weitz, D. A., Goldman, R. D., Aebi, U. & Herrmann, H. Intermediate filament  
1276 mechanics in vitro and in the cell: From coiled coils to filaments, fibers and networks.  
1277 *Curr. Opin. Cell Biol.* **32**, 82–91 (2015).
- 1278 15. Ausmees, N., Kuhn, J. R. & Jacobs-Wagner, C. The bacterial cytoskeleton: An  
1279 intermediate filament-like function in cell shape. *Cell* **115**, 705–713 (2003).
- 1280 16. Fuchino, K. *et al.* Dynamic gradients of an intermediate filament-like cytoskeleton are  
1281 recruited by a polarity landmark during apical growth. *Proceedings of the National*  
1282 *Academy of Sciences* **110**, E1889–E1897 (2013).
- 1283 17. Holmes, N. A. *et al.* Coiled-coil protein Scy is a key component of a multiprotein  
1284 assembly controlling polarized growth in *Streptomyces*. *Proceedings of the National*  
1285 *Academy of Sciences* **110**, E397–E406 (2013).

- 1286 18. Fenton, A. K., Hogley, L., Butan, C., Subramaniam, S. & Sockett, R. E. A coiled-coil-  
1287 repeat protein 'Ccrp' in *Bdellovibrio bacteriovorus* prevents cellular indentation, but is  
1288 not essential for vibroid cell morphology. *FEMS Microbiology Letters* **313**, 89–95 (2010).
- 1289 19. Waidner, B. *et al.* A novel system of cytoskeletal elements in the human pathogen  
1290 *Helicobacter pylori*. *PLoS Pathogens* **5**, (2009).
- 1291 20. Ent, F. van den, Amos, L. A. & Löwe, J. Prokaryotic origin of the actin cytoskeleton.  
1292 *Nature* **413**, 39–44 (2001).
- 1293 21. de Boer, P., Crossley, R. & Rothfield, L. The essential bacterial cell-division protein FtsZ  
1294 is a GTPase. *Nature* **359**, 254–256 (1992).
- 1295 22. Lin, L. & Thanbichler, M. Nucleotide-independent cytoskeletal scaffolds in bacteria.  
1296 *Cytoskeleton* **70**, 409–423 (2013).
- 1297 23. Kaiser, D. & Crosby, C. Cell movement and its coordination in swarms of *Myxococcus*  
1298 *xanthus*. *Cell Motil.* **3**, 227–245 (1983).
- 1299 24. Yang, R. *et al.* AglZ Is a Filament-Forming Coiled-Coil Protein Required for Adventurous  
1300 Gliding Motility of *Myxococcus xanthus*. *J. Bacteriol.* **186**, 6168–6178 (2004).
- 1301 25. Nan, B., Mauriello, E. M. F., Sun, I. H., Wong, A. & Zusman, D. R. A multi-protein  
1302 complex from *Myxococcus xanthus* required for bacterial gliding motility. *Mol. Microbiol.*  
1303 **76**, 1539–1554 (2010).
- 1304 26. Nan, B. *et al.* Myxobacteria gliding motility requires cytoskeleton rotation powered by  
1305 proton motive force. *Proc. Natl. Acad. Sci.* **108**, 2498–2503 (2011).
- 1306 27. Mauriello, E. M. F. *et al.* Bacterial motility complexes require the actin-like protein, MreB  
1307 and the Ras homologue, MglA. *EMBO J.* **29**, 315–326 (2010).
- 1308 28. Schumacher, D. & Søgaard-Andersen, L. Regulation of Cell Polarity in Motility and Cell  
1309 Division in *Myxococcus xanthus*. *Annu. Rev. Microbiol. Regul.* **71**, 61–78 (2017).
- 1310 29. Letek, M. *et al.* DivIVA is required for polar growth in the MreB-lacking rod-shaped  
1311 actinomycete *Corynebacterium glutamicum*. *J. Bacteriol.* **190**, 3283–3292 (2008).
- 1312 30. Puffal, J., García-Heredia, A., Rahlwes, K. C., Siegrist, M. S. & Morita, Y. S. Spatial  
1313 control of cell envelope biosynthesis in mycobacteria. *Pathog. Dis.* **76**, fty027 (2018).
- 1314 31. Surovtsev, I. V & Jacobs-Wagner, C. Subcellular organization: a critical feature of  
1315 bacterial cell replication. *Cell* **172**, 1271–1293 (2018).
- 1316 32. Bagchi, S., Tomenius, H., Belova, L. M. & Ausmees, N. Intermediate filament-like  
1317 proteins in bacteria and a cytoskeletal function in *Streptomyces*. *Mol. Microbiol.* **70**,  
1318 1037–1050 (2008).
- 1319 33. Hempel, A. M., Wang, S., Letek, M., Gil, J. A. & Flärdh, K. Assemblies of DivIVA mark  
1320 sites for hyphal branching and can establish new zones of cell wall growth in  
1321 *Streptomyces coelicolor*. *J. Bacteriol.* **190**, 7579–7583 (2008).
- 1322 34. Wagstaff, J. & Löwe, J. Prokaryotic cytoskeletons: protein filaments organizing small  
1323 cells. *Nat. Rev. Microbiol.* (2018). doi:10.1038/nrmicro.2017.153
- 1324 35. Schwedock, J., McCormick, J. R., Angert, E. R., Nodwell, J. R. & Losick, R. Assembly  
1325 of the cell division protein FtsZ into ladder-like structures in the aerial hyphae of  
1326 *Streptomyces coelicolor*. *Mol. Microbiol.* **25**, 847–858 (1997).
- 1327 36. Rippka, R., Stanier, R. Y., Deruelles, J., Herdman, M. & Waterbury, J. B. Generic

- 1328 Assignments, Strain Histories and Properties of Pure Cultures of Cyanobacteria.  
1329 *Microbiology* **111**, 1–61 (1979).
- 1330 37. Herrero, A., Stavans, J. & Flores, E. The multicellular nature of filamentous heterocyst-  
1331 forming cyanobacteria. *FEMS Microbiol. Rev.* **40**, 831–854 (2016).
- 1332 38. Zhang, C.-C. C., Huguenin, S., Friry, A., Huguenin, S. & Friry, A. Analysis of genes  
1333 encoding the cell division protein FtsZ and a glutathione synthetase homologue in the  
1334 cyanobacterium *Anabaena* sp. PCC 7120. *Res. Microbiol.* **146**, 445–455 (1995).
- 1335 39. Hu, B., Yang, G., Zhao, W., Zhang, Y. & Zhao, J. MreB is important for cell shape but  
1336 not for chromosome segregation of the filamentous cyanobacterium *Anabaena* sp. PCC  
1337 7120. *Mol. Microbiol.* **63**, 1640–1652 (2007).
- 1338 40. Burnat, M., Schleiff, E. & Flores, E. Cell envelope components influencing filament  
1339 length in the heterocyst-forming cyanobacterium *Anabaena* sp. strain PCC 7120. *J.*  
1340 *Bacteriol.* **196**, 4026–4035 (2014).
- 1341 41. Cho, H., Uehara, T. & Bernhardt, T. G. Beta-lactam antibiotics induce a lethal  
1342 malfunctioning of the bacterial cell wall synthesis machinery. *Cell* **159**, 1310–1311  
1343 (2014).
- 1344 42. Fenton, A. K., Mortaji, L. El, Lau, D. T. C., Rudner, D. Z. & Bernhardt, T. G. CozE is a  
1345 member of the MreCD complex that directs cell elongation in *Streptococcus*  
1346 *pneumoniae*. *Nat. Microbiol.* **2**, 1–9 (2016).
- 1347 43. Mullineaux, C. W. *et al.* Mechanism of intercellular molecular exchange in heterocyst-  
1348 forming cyanobacteria. *EMBO J.* **27**, 1299–1308 (2008).
- 1349 44. Wilk, L. *et al.* Outer membrane continuity and septosome formation between vegetative  
1350 cells in the filaments of *Anabaena* sp. PCC 7120. *Cell. Microbiol.* **13**, 1744–1754 (2011).
- 1351 45. Weiss, G. L., Kieninger, A.-K., Maldener, I., Forchhammer, K. & Pilhofer, M. Structure  
1352 and function of a bacterial gap junction analog. *bioRxiv* 462465 (2018).  
1353 doi:10.1101/462465
- 1354 46. Flores, E. *et al.* Septum-localized protein required for filament integrity and diazotrophy  
1355 in the heterocyst-forming cyanobacterium *Anabaena* sp. strain PCC 7120. *J. Bacteriol.*  
1356 **189**, 3884–3890 (2007).
- 1357 47. Lehner, J. *et al.* Prokaryotic multicellularity: A nanopore array for bacterial cell  
1358 communication. *FASEB J.* **27**, 2293–2300 (2013).
- 1359 48. Nayar, A. S., Yamaura, H., Rajagopalan, R., Risser, D. D. & Callahan, S. M. FraG is  
1360 necessary for filament integrity and heterocyst maturation in the cyanobacterium  
1361 *Anabaena* sp. strain PCC 7120. *Microbiology* **153**, 601–607 (2007).
- 1362 49. Merino-Puerto, V. *et al.* FraC/FraD-dependent intercellular molecular exchange in the  
1363 filaments of a heterocyst-forming cyanobacterium, *Anabaena* sp. *Mol. Microbiol.* **82**, 87–  
1364 98 (2011).
- 1365 50. Merino-Puerto, V., Mariscal, V., Mullineaux, C. W., Herrero, A. & Flores, E. Fra proteins  
1366 influencing filament integrity, diazotrophy and localization of septal protein SepJ in the  
1367 heterocyst-forming cyanobacterium *Anabaena* sp. *Mol. Microbiol.* **75**, 1159–1170  
1368 (2010).
- 1369 51. Herrmann, H. & Aebi, U. Intermediate Filaments: Molecular Structure, Assembly  
1370 Mechanism, and Integration Into Functionally Distinct Intracellular Scaffolds. *Annu. Rev.*  
1371 *Biochem.* **73**, 749–789 (2004).

- 1372 52. Specht, M., Schätzle, S., Graumann, P. L. & Waidner, B. Helicobacter pylori Possesses  
1373 Four Coiled-Coil-Rich Proteins That Form Extended Filamentous Structures and Control  
1374 Cell Shape and Motility. *J. Bacteriol.* **193**, 4523–4530 (2011).
- 1375 53. Herrmann, H., Bär, H., Kreplak, L., Strelkov, S. V. & Aebi, U. Intermediate filaments:  
1376 From cell architecture to nanomechanics. *Nat. Rev. Mol. Cell Biol.* **8**, 562–573 (2007).
- 1377 54. Kelemen, G. H. Intermediate Filaments Supporting Cell Shape and Growth in Bacteria  
1378 BT - Prokaryotic Cytoskeletons: Filamentous Protein Polymers Active in the Cytoplasm  
1379 of Bacterial and Archaeal Cells. in (eds. Löwe, J. & Amos, L. A.) 161–211 (Springer  
1380 International Publishing, 2017). doi:10.1007/978-3-319-53047-5\_6
- 1381 55. Camberg, J. L., Hoskins, J. R. & Wickner, S. ClpXP protease degrades the cytoskeletal  
1382 protein, FtsZ, and modulates FtsZ polymer dynamics. *Proc Natl Acad Sci U S A* **106**,  
1383 10614–10619 (2009).
- 1384 56. Charbon, G., Cabeen, M. T. & Jacobs-Wagner, C. Bacterial intermediate filaments: In  
1385 vivo assembly, organization, and dynamics of crescentin. *Genes and Development* **23**,  
1386 1131–1144 (2009).
- 1387 57. Weissenbach, J. *et al.* Evolution of Chaperonin Gene Duplication in Stigonematalean  
1388 Cyanobacteria (Subsection V). *Genome Biol. Evol.* **9**, 241–252 (2017).
- 1389 58. Elhai, J., Vepritskiy, A., Muro-Pastor, A. M., Flores, E. & Wolk, C. P. Reduction of  
1390 conjugal transfer efficiency by three restriction activities of Anabaena sp. strain PCC  
1391 7120. *J. Bacteriol.* **179**, 1998–2005 (1997).
- 1392 59. Sakr, S., Thyssen, M., Denis, M. & Zhang, C. C. Relationship among several key cell  
1393 cycle events in the developmental cyanobacterium Anabaena sp. strain PCC 7120. *J.*  
1394 *Bacteriol.* **188**, 5958–5965 (2006).
- 1395 60. Sakr, S., Jeanjean, R., Zhang, C.-C. & Arcondeguy, T. Inhibition of cell division  
1396 suppresses heterocyst development in Anabaena sp. strain PCC 7120. *J. Bacteriol.*  
1397 **188**, 1396–1404 (2006).
- 1398 61. Solovyev, V. & Salamov, A. Automatic Annotation of Microbial Genomes and  
1399 Metagenomic Sequences. in *Metagenomics and its Applications in Agriculture,*  
1400 *Biomedicine and Environmental Studies* (ed. Robert W. Li, pp) 61–78 (Nova Science  
1401 Publishers, Inc., 2011).
- 1402 62. Buikema, W. J. & Haselkorn, R. Expression of the Anabaena hetR gene from a copper-  
1403 regulated promoter leads to heterocyst differentiation under repressing conditions. *Proc.*  
1404 *Natl. Acad. Sci.* **98**, 2729–2734 (2001).
- 1405 63. Callahan, S. M. & Buikema, W. J. The role of HetN in maintenance of the heterocyst  
1406 pattern in Anabaena sp. PCC 7120. *Mol. Microbiol.* **40**, 941–950 (2001).
- 1407 64. Cabeen, M. T. & Jacobs-Wagner, C. Bacterial cell shape. *Nat. Rev. Microbiol.* **3**, 601–  
1408 610 (2005).
- 1409 65. Rojas, E. R. & Huang, K. C. Regulation of microbial growth by turgor pressure. *Curr.*  
1410 *Opin. Microbiol.* **42**, 62–70 (2018).
- 1411 66. Swulius, M. T. & Jensen, G. J. The helical mreB cytoskeleton in Escherichia coli  
1412 MC1000/pLE7 is an artifact of the N-terminal yellow fluorescent protein tag. *J. Bacteriol.*  
1413 **194**, 6382–6386 (2012).
- 1414 67. Wang, Y. *et al.* Coiled-coil networking shapes cell molecular machinery. *Mol. Biol. Cell*  
1415 **23**, 3911–3922 (2012).

- 1416 68. Mason, J. M. & Arndt, K. M. Coiled coil domains: Stability, specificity, and biological  
1417 implications. *ChemBioChem* **5**, 170–176 (2004).
- 1418 69. Lupas, A. N. & Gruber, M. B. T.-A. in P. C. The Structure of  $\alpha$ -Helical Coiled Coils. in  
1419 *Fibrous Proteins: Coiled-Coils, Collagen and Elastomers* **70**, 37–38 (Academic Press,  
1420 2005).
- 1421 70. Newman, J. R. S., Wolf, E. & Kim, P. S. A computationally directed screen identifying  
1422 interacting coiled coils from *Saccharomyces cerevisiae*. *Proc. Natl. Acad. Sci.* **97**,  
1423 13203–13208 (2002).
- 1424 71. Litowski, J. R. & Hodges, R. S. Designing Heterodimeric Two-stranded  $\alpha$ -Helical Coiled-  
1425 coils. *J. Biol. Chem.* **277**, 37272–37279 (2002).
- 1426 72. Vinson, C. R., Hai, T. & Boyd, S. M. Dimerization specificity of the leucine zipper-  
1427 containing bZIP motif on DNA binding: Prediction and rational design. *Genes Dev.* **7**,  
1428 1047–1058 (1993).
- 1429 73. Shea, E. K. O., Rutkowski, R., Iii, W. F. S. & Kim, P. S. Preferential Heterodimer  
1430 Formation by Isolated Leucine Zippers from Fos and Jun. *Science (80-. )*. **245**, 646–648  
1431 (1989).
- 1432 74. Mier, P., Alanis-Lobato, G. & Andrade-Navarro, M. A. Protein-protein interactions can  
1433 be predicted using coiled coil co-evolution patterns. *J. Theor. Biol.* **412**, 198–203 (2017).
- 1434 75. Hai, T., Liu, F., Coukos, W. J. & Green, M. R. Transcription factor ATF cDNA clones: An  
1435 extensive family of leucine zipper proteins able to selectively form DNA-binding  
1436 heterodimers. *Genes Dev.* **3**, 2083–2090 (1989).
- 1437 76. Strauss, H. M. & Keller, S. Pharmacological Interference with Protein – Protein  
1438 Interactions Mediated by Coiled-Coil Motifs. *Handb. Exp. Pharmacol.* 13125–13125  
1439 (2008). doi:10.1007/978-3-540-72843-6\_19
- 1440 77. Cabeen, M. T. & Jacobs-Wagner, C. The Bacterial Cytoskeleton. **44**, 365–392 (2010).
- 1441 78. Kerff, F., Terrak, M., Charlier, P., Sauvage, E. & Ayala, J. A. The penicillin-binding  
1442 proteins: structure and role in peptidoglycan biosynthesis. *FEMS Microbiol. Rev.* **32**,  
1443 234–258 (2008).
- 1444 79. van Teeseling, M. C. F., de Pedro, M. A. & Cava, F. Determinants of bacterial  
1445 morphology: From fundamentals to possibilities for antimicrobial targeting. *Front.*  
1446 *Microbiol.* **8**, 1–18 (2017).
- 1447 80. Lutkenhaus, J. The ParA/MinD family puts things in their place. *Trends Microbiol.* **20**,  
1448 411–418 (2012).
- 1449 81. Leipe, D. D., Wolf, Y. I., Koonin, E. V & Aravind, L. Classification and evolution of P-  
1450 loop GTPases and related ATPases. *J. Mol. Biol.* **317**, 41–72 (2002).
- 1451 82. Ramos-León, F., Mariscal, V., Frías, J. E., Flores, E. & Herrero, A. Divisome-dependent  
1452 subcellular localization of cell-cell joining protein SepJ in the filamentous  
1453 cyanobacterium *Anabaena*. *Mol. Microbiol.* **96**, 566–580 (2015).
- 1454 83. Heins, S. & Aebi, U. Making heads and tails of intermediate filament assembly,  
1455 dynamics and networks. *Curr. Opin. Cell Biol.* **6**, 25–33 (1994).
- 1456 84. Herrmann, H. *et al.* Structure and assembly properties of the intermediate filament  
1457 protein vimentin: The role of its head, rod and tail domains. *J. Mol. Biol.* **264**, 933–953  
1458 (1996).

- 1459 85. England, P. *et al.* The Scc Spirochetal Coiled-Coil Protein Forms Helix-Like Filaments  
1460 and Binds to Nucleic Acids Generating Nucleoprotein Structures. *J. Bacteriol.* **188**, 469–  
1461 476 (2005).
- 1462 86. Ingerson-Mahar, M., Briegel, A., Werner, J. N., Jensen, G. J. & Gitai, Z. The metabolic  
1463 enzyme CTP synthase forms cytoskeletal filaments. *Nature Cell Biology* **12**, 739–746  
1464 (2010).
- 1465 87. Cabeen, M. T. *et al.* Bacterial cell curvature through mechanical control of cell growth.  
1466 *The EMBO Journal* **28**, 1208–1219 (2009).
- 1467 88. Shieh, Y.-W. *et al.* Operon structure and cotranslational subunit association direct  
1468 protein assembly in bacteria. *Science (80-. )*. **350**, 678 LP – 680 (2015).
- 1469 89. Jones, L. J. F., Carballido-López, R. & Errington, J. Control of cell shape in bacteria:  
1470 Helical, actin-like filaments in *Bacillus subtilis*. *Cell* **104**, 913–922 (2001).
- 1471 90. Alberts, B. *et al.* *Molecular Biology of the Cell*. (Garland Science, 2014).
- 1472 91. Herrmann, H. & Aebi, U. Intermediate filaments and their associates: Multi-talented  
1473 structural elements specifying cytoarchitecture and cytodynamics. *Curr. Opin. Cell Biol.*  
1474 **12**, 79–90 (2000).
- 1475 92. Leung, C. L., Green, K. J. & Liem, R. K. H. Plakins: A family of versatile cytolinker  
1476 proteins. *Trends Cell Biol.* **12**, 37–45 (2002).
- 1477 93. Zhang, R., Zhang, C., Zhao, Q. & Li, D. Spectrin: Structure, function and disease. *Sci.*  
1478 *China Life Sci.* **56**, 1076–1085 (2013).
- 1479 94. Typas, A., Banzhaf, M., Gross, C. A. & Vollmer, W. From the regulation of peptidoglycan  
1480 synthesis to bacterial growth and morphology. *Nat. Rev. Microbiol.* **10**, 123–136 (2012).
- 1481 95. Persat, A. *et al.* The mechanical world of bacteria. *Cell* **161**, 988–997 (2015).
- 1482 96. Park, A., Jeong, H.-H., Lee, J., Kim, K. P. & Lee, C.-S. Effect of shear stress on the  
1483 formation of bacterial biofilm in a microfluidic channel. *BioChip J.* **5**, 236–241 (2011).
- 1484 97. Young, K. D. The selective value of bacterial shape. *Microbiol. Mol. Biol. Rev.* **70**, 660–  
1485 703 (2006).
- 1486 98. Lupas, A., Van Dyke, M. & Stock, J. Predicting coiled coils from protein sequences.  
1487 *Science* **252**, 1162–1164 (1991).
- 1488 99. Wilson, C. G. M., Magliery, T. J. & Regan, L. Detecting protein-protein interactions with  
1489 GFP-fragment reassembly. *Nat. Methods* **1**, 255–262 (2004).
- 1490 100. Yang, Y. *et al.* Phenotypic variation caused by variation in the relative copy number of  
1491 pDU1-based plasmids expressing the GAF domain of Pkn41 or Pkn42 in *Anabaena* sp.  
1492 PCC 7120. *Res. Microbiol.* **164**, 127–135 (2013).
- 1493 101. Nieves-Mori3n, M. *et al.* Specific Glucoside Transporters Influence Septal Structure and  
1494 Function in the Filamentous, Heterocyst-Forming Cyanobacterium *Anabaena* sp. Strain  
1495 PCC 7120. *J. Bacteriol.* **199**, e00876-16 (2017).
- 1496 102. Bornikoel, J. *et al.* Role of Two Cell Wall Amidases in Septal Junction and Nanopore  
1497 Formation in the Multicellular Cyanobacterium *Anabaena* sp. PCC 7120. *Front. Cell.*  
1498 *Infect. Microbiol.* **7**, 386 (2017).
- 1499 103. Karimova, G., Davi, M. & Ladant, D. The  $\beta$ -lactam resistance protein Blr, a small  
1500 membrane polypeptide, is a component of the *Escherichia coli* cell division machinery.



- 1501 *J. Bacteriol.* **194**, 5576–5588 (2012).
- 1502 104. Roy, A., Yang, J. & Zhang, Y. COFACTOR: An accurate comparative algorithm for  
1503 structure-based protein function annotation. *Nucleic Acids Res.* **40**, 471–477 (2012).
- 1504 105. Zhang, Y. I-TASSER: Fully automated protein structure prediction in CASP8. *Proteins*  
1505 *Struct. Funct. Bioinforma.* **77**, 100–113 (2009).
- 1506 106. Yang, J. & Zhang, Y. I-TASSER server: New development for protein structure and  
1507 function predictions. *Nucleic Acids Res.* **43**, W174–W181 (2015).
- 1508 107. Lutkenhaus, J. Another Cytoskeleton in the Closet. *Cell* **115**, 648–650 (2003).
- 1509 108. Jin, S. K. & Sun, S. X. Morphology of *Caulobacter crescentus* and the mechanical role  
1510 of crescentin. *Biophysical Journal* **96**, (2009).
- 1511 109. Cabeen, M. T., Herrmann, H. & Jacobs-Wagner, C. The domain organization of the  
1512 bacterial intermediate filament-like protein crescentin is important for assembly and  
1513 function. *Cytoskeleton* **68**, 205–219 (2011).
- 1514 110. Dagan, T. *et al.* Genomes of stigonematalean cyanobacteria (subsection V) and the  
1515 evolution of oxygenic photosynthesis from prokaryotes to plastids. *Genome Biol. Evol.*  
1516 **5**, 31–44 (2013).
- 1517 111. Tria, F. D. K., Landan, G. & Dagan, T. Phylogenetic rooting using minimal ancestor  
1518 deviation. *Nat. Ecol. Evol.* **1**, 0193 (2017).
- 1519 112. Altschul, S. F., Gish, W., Miller, W., Myers, E. W. & Lipman, D. J. Basic local alignment  
1520 search tool. *J. Mol. Biol.* **215**, 403–410 (1990).
- 1521 113. Rice, P., Longden, I. & Bleasby, A. EMBOSS: the European Molecular Biology Open  
1522 Software Suite. *Trends Genet.* **16**, 276–7 (2000).
- 1523 114. Letunic, I. & Bork, P. Interactive tree of life (iTOL) v3: an online tool for the display and  
1524 annotation of phylogenetic and other trees. *Nucleic Acids Res.* **44**, W242–W245 (2016).
- 1525 115. Sambrook, J. & Green, M. R. *Molecular Cloning: A Laboratory Manual*. (Cold Spring  
1526 Harbor Laboratory Press, 2012).
- 1527 116. Ungerer, J. & Pakrasi, H. B. Cpf1 Is A Versatile Tool for CRISPR Genome Editing Across  
1528 Diverse Species of Cyanobacteria. *Sci. Rep.* **6**, 1–9 (2016).
- 1529 117. Wolk, C. P. *et al.* Isolation and complementation of mutants of *Anabaena* sp. strain PCC  
1530 7120 unable to grow aerobically on dinitrogen. *J. Bacteriol.* **170**, 1239–1244 (1988).
- 1531 118. Stucken, K., Ilhan, J., Roettger, M., Dagan, T. & Martin, W. F. Transformation and  
1532 conjugal transfer of foreign genes into the filamentous multicellular cyanobacteria  
1533 (subsection V) *Fischerella* and *Chlorogloeopsis*. *Curr. Microbiol.* **65**, 552–560 (2012).
- 1534 119. Cai, Y. & Wolk, C. P. Use of a conditionally lethal gene in *Anabaena* sp. strain PCC  
1535 7120 to select for double recombinants and to entrap insertion sequences. *J. Bacteriol.*  
1536 **172**, 3138–3145 (1990).
- 1537 120. Fiedler, G., Arnold, M., Hannus, S. & Maldener, I. The DevBCA exporter is essential for  
1538 envelope formation in heterocysts of the cyanobacterium *Anabaena* sp. strain PCC  
1539 7120. *Mol. Microbiol.* **27**, 1193–1202 (1998).
- 1540 121. Kühner, D., Stahl, M., Demircioglu, D. D. & Bertsche, U. From cells to muropeptide  
1541 structures in 24 h: Peptidoglycan mapping by UPLC-MS . (2014).

- 1542 122. Lehner, J. *et al.* The morphogene AmiC2 is pivotal for multicellular development in the  
1543 cyanobacterium *Nostoc punctiforme*. *Mol. Microbiol.* **79**, 1655–1669 (2011).
- 1544 123. Rudolf, M. *et al.* The Peptidoglycan-Binding Protein SjcF1 Influences Septal Junction  
1545 Function and Channel Formation in the Filamentous Cyanobacterium  
1546 *&lt;em>Anabaena</em>*; *MBio* **6**, e00376-15 (2015).
- 1547 124. Dörrich, A. K., Mitschke, J., Siadat, O. & Wilde, A. Deletion of the *Synechocystis* sp.  
1548 PCC 6803 *kaiAB1C1* gene cluster causes impaired cell growth under light???dark  
1549 conditions. *Microbiol. (United Kingdom)* **160**, 2538–2550 (2014).
- 1550 125. Grant, S. G., Jessee, J., Bloom, F. R. & Hanahan, D. Differential plasmid rescue from  
1551 transgenic mouse DNAs into *Escherichia coli* methylation-restriction mutants. *Proc.*  
1552 *Natl. Acad. Sci.* **87**, 4645–4649 (1990).
- 1553 126. Studier, F. W. & Moffatt, B. A. Use of bacteriophage T7 RNA polymerase to direct  
1554 selective high-level expression of cloned genes. *J. Mol. Biol.* **189**, 113–130 (1986).
- 1555 127. Boyer, H. & Roulland-Dessoix, D. A complementation analysis of the restriction and  
1556 modification of DNA in *Escherichia coli*. *J. Mol. Biol.* **41**, 459–472 (1969).
- 1557 128. Cohen, S. E. *et al.* Dynamic localization of the cyanobacterial circadian clock proteins.  
1558 *Curr. Biol.* **24**, 1836–1844 (2014).
- 1559 129. Olmedo-Verd, E., Muro-Pastor, A. M., Flores, E. & Herrero, A. Localized induction of the  
1560 *ntcA* regulatory gene in developing heterocysts of *Anabaena* sp. strain PCC 7120. *J.*  
1561 *Bacteriol.* **188**, 6694–6699 (2006).
- 1562
