1 **Two novel heteropolymer-forming proteins maintain multicellular shape of the**  
2 **cyanobacterium *Anabaena* sp. PCC 7120**

3

4 Benjamin L. Springstein<sup>1\*#</sup>, Dennis J. Nürnberg<sup>2,†</sup>, Christian Woehle<sup>1¥</sup>, Julia Weissenbach<sup>1,‡</sup>,  
5 Marius L. Theune<sup>1</sup>, Andreas O. Helbig<sup>3</sup>, Iris Maldener<sup>4</sup>, Tal Dagan<sup>1</sup>, Karina Stucken<sup>5\*</sup>

6

7 <sup>1</sup> Institute of Microbiology, Christian-Albrechts-Universität zu Kiel, Kiel, Germany

8 <sup>2</sup> Department of Life Sciences, Imperial College, London, United Kingdom

9 <sup>3</sup> AG Proteomics & Bioanalytics, Institute for Experimental Medicine, Christian-Albrechts-  
10 Universität zu Kiel, Kiel, Germany

11 <sup>4</sup> Interfaculty Institute of Microbiology and Infection Medicine Tübingen/Organismic  
12 Interactions, University of Tübingen, Tübingen, Germany

13 <sup>5</sup> Department of Food Engineering, University of La Serena, La Serena, Chile.

14

15 # Present address: Department of Microbiology, Blavatnick Institute, Harvard Medical School,  
16 Boston, MA, USA

17 † Present address: Institute of Experimental Physics, Free University of Berlin, Berlin, Germany

18 ¥ Present address: Max Planck-Genome-centre cologne, Max Planck Institute for Plant  
19 Breeding Research, Cologne, Germany

20 ‡ Present address: Faculty of Biology, Technion-Israel Institute of Technology, Haifa, Israel

21

22 \* Corresponding authors: BLS: [benjamin\\_springstein@hms.harvard.edu](mailto:benjamin_springstein@hms.harvard.edu)

23 KS: [kstucken@userena.cl](mailto:kstucken@userena.cl)

## 24 **Abstract**

25 Polymerizing and filament-forming proteins are instrumental for numerous cellular processes  
26 such as cell division and growth. Their function in stabilization and localization of protein  
27 complexes and replicons is achieved by a filamentous structure. Known filamentous proteins  
28 assemble into homopolymers consisting of single subunits – e.g. MreB and FtsZ in bacteria –  
29 or heteropolymers that are composed of two subunits, e.g. keratin and  $\alpha/\beta$  tubulin in  
30 eukaryotes. Here, we describe two novel coiled-coil-rich proteins (CCRPs) in the filament  
31 forming cyanobacterium *Anabaena* sp. PCC 7120 (hereafter *Anabaena*) that assemble into a  
32 heteropolymer and function in the maintenance of the *Anabaena* multicellular shape (termed  
33 trichome). The two CCRPs – Alr4504 and Alr4505 (named ZicK and Zack) – are strictly  
34 interdependent for the assembly of protein filaments *in vivo* and polymerize nucleotide-  
35 independently *in vitro*, similar to known intermediate filament (IF) proteins. A  $\Delta zicK\Delta zack$   
36 double mutant is characterized by a zigzagged cell arrangement and hence a loss of the typical  
37 linear *Anabaena* trichome shape. ZicK and Zack interact with themselves, with each other,  
38 with the elongasome protein MreB, the septal junction protein SepJ and the divisome associate  
39 septal protein SepI. Our results suggest that ZicK and Zack function in cooperation with SepJ  
40 and MreB to stabilize the *Anabaena* trichome and are likely essential for the manifestation of  
41 the multicellular shape in *Anabaena*. Our study reveals the presence of filament-forming IF-  
42 like proteins whose function is achieved through the formation of heteropolymers in  
43 cyanobacteria.

## 44 **Introduction**

45 Cytoskeletal proteins that polymerize to form protein filaments are paramount in bacterial cell  
46 biology where they play a role in cell division, alignment of bacterial microcompartments  
47 (BMCs), chromosome and plasmid segregation, organization of cell polarity and the  
48 determination of cell shape (Wagstaff and Löwe, 2018). For example, FtsZ (Van De Putte *et al.*,  
49 1964; de Boer *et al.*, 1992), the prokaryotic homolog to the eukaryotic tubulin (Löwe and  
50 Amos, 1998; Nogales *et al.*, 1998), is a main component of the divisome (den Blaauwen *et al.*,

51 2017), a multiprotein complex that governs cell division in bacteria and self-assembles into a  
52 proteinaceous ring (called Z-ring) at the midcell position (Bi and Lutkenhaus, 1991). Another  
53 key bacterial cytoskeletal protein is MreB (Jones *et al.*, 2001), which is a homolog of the  
54 eukaryotic actin (de Boer *et al.*, 1992; Ent *et al.*, 2001) and a crucial component of the multi-  
55 protein complexes termed the elongasome. This complex modulates cell elongation in many  
56 rod-shaped bacteria through regulating peptidoglycan (PG) biogenesis (Errington and Wu,  
57 2017). Both, FtsZ and MreB monomers assemble into filamentous strands (protofilaments),  
58 consisting of only one type of monomer, termed homopolymers (Wagstaff and Löwe, 2018).  
59 The cell division in prokaryotes markedly contrasts the division of plastid organelles in  
60 photosynthetic eukaryotes that are of cyanobacterial origin (e.g., (Dagan *et al.*, 2013)). Cell  
61 division in plastids is dependent on the cooperative function and heteropolymerization of two  
62 FtsZ homologs, FtsZ1 and FtsZ2 in the green lineages and FtsZA and FtsZB in the red lineage.  
63 However, each FtsZ homolog is also self-sufficient to form homopolymers (reviewed by (Chen  
64 *et al.*, 2018)). In contrast, a likely horizontally transferred pair of tubulin homologs, BtubA and  
65 BtubB from *Prothescobacter* spp., exclusively assembles into heteropolymers *in vitro*  
66 (Schlieper *et al.*, 2005), revealing similar properties than eukaryotic microtubules that are  
67 heteropolymers composed of  $\alpha$  and  $\beta$  tubulin monomers (Alberts *et al.*, 2014). Eukaryotic IF  
68 proteins, despite sharing substantially the same building blocks and a high degree of coiled-  
69 coil (CC) domains (Fuchs and Weber, 1994), which are considered excellent mediators of  
70 protein-protein interactions (Mason and Arndt, 2004), only form heteropolymers with a subset  
71 of other IF proteins within their same assembly group but otherwise form obligate  
72 homopolymers (Herrmann and Aebi, 2000).

73 Polymer-forming coiled-coil-rich proteins (CCRPs) have been shown to play a role also  
74 in multicellularity traits in myxobacteria and actinomycetes (reviewed by (Lin and Thanbichler,  
75 2013; Wagstaff and Löwe, 2018)). Similar to eukaryotic IFs (Fuchs and Weber, 1994), many  
76 bacterial CCRPs perform cytoskeletal functions through their ability to self-assemble into  
77 filaments *in vivo* and *in vitro* in a self-sufficient and co-factor independent manner (Ausmees  
78 *et al.*, 2003; Bagchi *et al.*, 2008; Specht *et al.*, 2011; Holmes *et al.*, 2013). The CCRP

79 Crescentin determines the *C. crescentus* typical curved morphology by aligning to the inner  
80 cell curvature and exuding local mechanical constraints on the PG biosynthesis, likely through  
81 cooperation with MreB (Ausmees *et al.*, 2003; Charbon *et al.*, 2009). In analogy to eukaryotic  
82 IF proteins, Crescentin assembles into straight protein filaments with a width of 10 nm and  
83 displays a similar domain organization (Ausmees *et al.*, 2003). However, while Crescentin is  
84 often considered a prokaryotic homologue to eukaryotic IF proteins, its restricted distribution  
85 to only one identified organism questions real homologous relationships and rather suggests  
86 that it was acquired by horizontal gene transfer (Erickson, 2007; Wickstead and Gull, 2011).  
87 Multicellular actinobacteria, such as *Streptomyces* spp., grow by building new cell wall (*i.e.*,  
88 PG) only at the cell poles, independent of MreB (Letek *et al.*, 2008), a striking different cell  
89 growth than in most other bacteria (Surovtsev and Jacobs-Wagner, 2018). This characteristic  
90 polar growth mode is organized by a cytoskeletal network of at least three CCRPs - DivIVA,  
91 Scy and FilP – that directly interact with each other to form the polarisome (Holmes *et al.*,  
92 2013). FilP and Scy, independently self-assemble into filaments *in vitro* (Bagchi *et al.*, 2008;  
93 Holmes *et al.*, 2013; Javadi *et al.*, 2019), thereby fulfilling major IF-like criteria (Wagstaff and  
94 Löwe, 2018). *In vivo*, however, Scy does not form filaments and instead accumulates as foci  
95 at future branching points (Holmes *et al.*, 2013), while FilP localizes as gradient-like caudates  
96 at the hyphal tips (Fröjd and Flärdh, 2019), instead of forming distinct filaments as observed  
97 for Crescentin (Ausmees *et al.*, 2003). Although of essential importance for growth and cell  
98 shape, the polarisome does not directly regulate multicellularity in Actinobacteria, which is  
99 instead maintained by the highly reproducible and coordinated formation of Z-ring ladders  
100 during sporulation (Schwedock *et al.*, 1997; Claessen *et al.*, 2014).

101         Among prokaryotes, Cyanobacteria exhibit the largest morphological diversity,  
102 comprising unicellular species as well as complex cell-differentiating multicellular species  
103 (Rippka *et al.*, 1979). For the model multicellular cyanobacterium *Anabaena*, it is imperative to  
104 form stable trichomes in order to cope with external influences such as shearing stress  
105 (Corrales-Guerrero *et al.*, 2013; Flores *et al.*, 2016). Under nitrogen-deprived growth  
106 conditions, *Anabaena* develops specialized cell types for nitrogen fixation (heterocysts), which



107 are evenly spaced among the *Anabaena* trichome and provide other vegetative cells with fixed  
108 nitrogen compounds like glutamine (Herrero *et al.*, 2016). In *Anabaena*, proteinaceous cell-  
109 joining structures that allow intercellular transport (*i.e.*, cell-cell communication) and function  
110 by gating are termed septal junctions (analogous to eukaryotic gap junctions; (Wilk *et al.*, 2011;  
111 Flores *et al.*, 2018; Weiss *et al.*, 2019)). Septal junctions consist of several structural elements,  
112 an intracellular cap, a plug inside the cytoplasmic membrane formed by the septal junction  
113 protein FraD and a tube traversing the septum through nanopores in the peptidoglycan (Weiss  
114 *et al.* 2019). The correct positioning of the septal protein SepJ, which is involved in septum  
115 maturation and filament stability, among others, depends on the FtsZ-driven divisome  
116 component FtsQ (Ramos-León *et al.*, 2015), which links the early and late assembly  
117 components of the divisome (Choi *et al.*, 2018). FtsZ was shown to be essential for *Anabaena*  
118 viability and to assemble in a typical Z-ring structure at future septum sites in vegetative cells  
119 while being downregulated in heterocysts (Zhang *et al.*, 1995; Sakr *et al.*, 2006a; Klint *et al.*,  
120 2007). In contrast, MreB is dispensable for *Anabaena* viability but determines the typical  
121 rectangular-like, since  $\Delta mreB$  mutant cells show pronounced rounded and swollen  
122 morphotype. Unlike in many unicellular bacteria, MreB does not affect chromosome  
123 segregation, which was found to be governed, at least in part, by random segregation in  
124 *Anabaena* (Hu *et al.*, 2007). Maintenance of the rectangular cell shape is furthermore  
125 dependent on a class B penicillin-binding-protein (PBP) (Burnat *et al.*, 2014) and AmiC-type  
126 cell wall amidases in *Anabaena* (Bornikoel *et al.*, 2017; Kieninger *et al.*, 2019), suggesting that  
127 loss of normal cell shape is commonly associated with defects in PG biogenesis (Fenton *et al.*,  
128 2016).

129 In this work, we aimed to identify proteins that play a role in cyanobacterial morphology  
130 and multicellularity. Searching for IF-like CCRPs, we identified two novel CCRPs in *Anabaena*  
131 that are capable of assembly exclusively into a heteropolymer *in vitro* and *in vivo* and that have  
132 a putative role in the *Anabaena* linear trichome shape.

## 133 **Results**

### 134 **CCRPs ZicK and ZacK from *Anabaena* are conserved in Cyanobacteria**

135 A computational survey of the *Anabaena* genome for protein-coding genes containing a high  
136 coiled-coil content (Springstein *et al.*, 2020b) revealed two CCRPs Alr4504 and Alr4505; here  
137 we term the two CCRPs ZicK and ZacK, respectively (that is, zig and zag in German). ZicK is  
138 predicted to contain five distinct coiled-coil (CC) domains while ZacK has four CC domains  
139 (Fig 1A; Supplementary File 1). Using PSORTb (v.3.0.2), both ZicK and ZacK are predicted to  
140 be cytoplasmic proteins, which is corroborated by the absence of detectable transmembrane  
141 domains (predicted using TMHMM v. 2.0). Since both proteins (and their homologs) are  
142 annotated as hypothetical proteins (Supplementary File 2), we validated their transcription  
143 under standard (BG11) and diazotrophic (BG11<sub>0</sub>) growth conditions (Supplementary Fig.  
144 1B,C). The genomic neighbourhood of *zicK* and *zacK* motivated us to test for a common  
145 transcriptional regulation of both genes (*i.e.*, an operon structure), however, we did not identify  
146 a common transcript (using RT-PCR; Supplementary Fig. 1A,B). Searching for known proteins  
147 sharing structural similarities to ZicK/ZacK using I-TASSER revealed structural similarities  
148 between ZicK and the eukaryotic cytolinker protein plectin, and of ZacK with the cell division  
149 protein EzrA, a predicted structural similarity that was previously associated with other  
150 bacterial CCRPs, including Crescentin, HmpF<sub>Syn</sub> and HmpF<sub>Syc</sub> (Springstein *et al.*, 2020b).  
151 Further annotation using the NCBI conserved domain search (Marchler-Bauer *et al.*, 2016)  
152 showed that ZicK and ZacK contain “structural maintenance of chromosomes” (SMC) domains  
153 (Fig. 1B), similarly to what we previously identified in other self-polymerizing cyanobacterial  
154 CCRPs (Springstein *et al.*, 2020b). A search for ZicK/ZacK homologs by sequence similarity  
155 revealed that they are absent in picocyanobacteria (*i.e.*, *Synechococcus/Prochlorococcus*) and  
156 generally rare in unicellular cyanobacteria. Otherwise, about 50% of the examined 168  
157 cyanobacterial genomes have homologs for the two genes (Fig. 1C and Supplementary File  
158 2). Several heterocystous cyanobacteria lacking ZacK/ZacK homologs are characterized by a  
159 reduced genome (*e.g.*, *Nostoc azollae* PCC 0708 and *Richelia intracellularis*). Additionally,

160 *Chlorogloeopsis* spp. that forms multiseriate filaments is lacking the homologs and several  
161 strains of *Fischerella* spp., which forms true branching filaments, harbour only a ZacK homolog.  
162 The protein sequence of ZicK and ZacK homologs is well conserved, with about 55% amino  
163 acids identity among the homologs. The number of CC domains, however, differ among ZicK  
164 and ZacK homologs: between 3-6 CC domains in ZicK homologs, and 3-10 domains in ZacK  
165 homologs (Supplementary File 1). Notably, ZicK and ZacK are neighbours in 53 out of 72  
166 genomes; both proteins and their genomic neighbourhood is highly conserved among  
167 heterocystous cyanobacteria (Fig. 1C,D).

### 168 **ZicK and ZacK are interdependent for polymerization *in vitro***

169 As a prerequisite for proteins to be considered as IF-like proteins, it is imperative for them to  
170 be able to self-interact *in vivo* and to polymerize into long protein filaments *in vitro* (Wagstaff  
171 and Löwe, 2018). To investigate the *in vitro* polymerization properties of ZicK and ZacK, we  
172 employed an *in vitro* polymerization assay that we previously established to test CCRPs'  
173 polymerization properties (Springstein *et al.*, 2020b). As a positive control for our approach,  
174 we used Crescentin (Fig. 1A), which formed an extensive filamentous network in our *in vitro*  
175 assay (Supplementary Fig. 2). As negative controls, we included empty vector-carrying *E. coli*  
176 cells, GroEL1.2 from *Chlorogloeopsis fritschii* PCC 6912 (known to form oligomers  
177 (Weissenbach *et al.*, 2017)) and the highly soluble maltose binding protein (MBP), all of which  
178 were tested negative for filament formation *in vitro* using our approach (Supplementary Fig. 2).  
179 Purified ZicK protein formed into amorphous, non-filamentous protein aggregates while ZacK  
180 assembled into aggregated sheet-like structures (Fig. 2A). The vast majority of ZacK protein  
181 precipitated into clumps of aggregates upon renaturation, which resembled the structures  
182 observed for GroEL1.2, suggesting that ZacK has only a partial capacity to self-polymerize or,  
183 more likely, is highly unstable on its own *in vitro*. Inspired by the close genomic localization of  
184 *zicK* and *zacK*, we next tested for a potential heteropolymerization of both proteins. This  
185 revealed that ZicK and ZacK co-assembled into a meshwork of protein heteropolymers upon  
186 co-renaturation (Fig. 2A, Supplementary Fig. 3). While both, ZicK and ZacK renatured alone,

187 formed aggregates in the dialysis tubes that were detectable with the naked eye (similar to our  
188 observations from GroEL1.2), co-renatured ZicK/ZacK remained in solution, a common  
189 property of eukaryotic IFs (Köster *et al.*, 2015). Next, we tested whether the co-filamentation  
190 was dosage dependent and observed that distinct protein filaments could be detected *in vitro*  
191 only with equal amounts of ZicK and ZacK (Supplementary Fig. 3). To further test for an *in vivo*  
192 self-interaction, we analysed the self-binding capacity ZicK and ZacK using the bacterial  
193 adenylate cyclase two-hybrid (BACTH) assay and found that ZicK and ZacK interact with  
194 themselves and also with each other (Fig. 2B) confirming the heterologous binding capacity of  
195 both proteins. Consequently, ZicK and ZacK fulfil a major characteristic of IF and IF-like  
196 proteins as they are able to self-assemble into filament-like structures *in vitro*, although, unlike  
197 other bacterial IF-like CCRPs, this assembly exclusively occurs as a heteropolymer.

#### 198 **ZicK and ZacK are interdependent for polymerization *in vivo***

199 To examine the *in vivo* localization pattern of ZicK and ZacK, we initially expressed  
200 translational GFP fusions of both proteins from the replicative pRL25C plasmid, which is  
201 commonly used in experimental work in *Anabaena* (Sakr *et al.*, 2006b; Sakr *et al.*, 2006a; Hu  
202 *et al.*, 2007; Du *et al.*, 2012). The expression of ZicK-GFP and ZacK-GFP from their respective  
203 native promoters (as predicted using BPROM (Solovyev and Salamov, 2011)) revealed no  
204 discernible expression of ZacK-GFP, while ZicK-GFP accumulated within the cells as dot-like  
205 aggregates (Supplementary Fig. 4A). We assume that the lack of ZacK-GFP expression from  
206 its predicted native promoter is based on the uncertainty of the precise promoter site prediction.  
207 Alternatively, and although not expressed as an operon, expression of *zacK* could be affected  
208 by the expression of *zicK* by so far unknown mechanisms. Consequently, we proceeded to  
209 investigate the *in vivo* localization of both proteins from the copper-regulated *petE* promoter  
210 ( $P_{petE}$ ), which is commonly used to study the subcellular protein localization in *Anabaena* (e.g.,  
211 FtsZ, MreB and SepI; (Sakr *et al.*, 2006a; Sakr *et al.*, 2006b; Hu *et al.*, 2007; Springstein *et al.*,  
212 2020a). The expression of ZicK-GFP and ZacK-GFP from  $P_{petE}$  in *Anabaena* independently did  
213 not reveal distinct or filamentous structures but resulted in the formation of inclusion body-like

214 aggregates within the cells (Fig. 3A), similar to those observed for  $P_{zicK}::zicK-gfp$   
215 (Supplementary Fig. 4A). We could not detect any structures when we expressed ZicK and  
216 ZacK N-terminally fused to GFP, suggesting that the N-terminus is key for proper protein  
217 folding. Consequently, we next proceeded to co-express the two proteins with different  
218 fluorophores (from  $P_{petE}$ ): ZicK C-terminally fused to eCFP (ZicK-eCFP) and ZacK C-terminally  
219 fused to GFP (ZacK-GFP). This revealed the formation of a ZicK/ZacK heteropolymer filament-  
220 like structure that usually localized along the longitudinal cell axis and in rare occasions also  
221 perpendicular to the cell axis (Fig. 3B). The prominent formation of the ZicK/ZacK  
222 heteropolymer was furthermore evident as electron-dense filament-like structures in ultrathin  
223 sections using electron microscopy (Fig. 3C). To confirm that the localization of fluorophore  
224 tagged ZicK and ZacK is not affected by the wild type (WT) *zicK* or *zacK* alleles, we additionally  
225 localized both proteins individually or together in a  $\Delta zicK\Delta zacK$  double mutant. These  
226 experiments revealed the same localization pattern as in *Anabaena* WT, suggesting that  
227 natively present ZicK or ZacK proteins do not affect the formation of ZicK-GFP, ZacK-GFP or  
228 the ZicK-eCFP/ZacK-GFP heteropolymer (Supplementary Fig. 4B,C). The intracellular  
229 localization of the ZicK/ZacK heteropolymer in *Anabaena* indicates that the polymer is either  
230 anchored at the cell poles or specifically split during cell division, as ZicK/ZacK filament-like  
231 structures were never observed to cross cell-cell borders and only traversed through not yet  
232 fully divided cells (Fig. 3B inlay and Fig. 3C). To further explore whether the ZicK/ZacK  
233 heteropolymer assembly is restricted to *Anabaena*, we proceeded to analyse ZicK and ZacK  
234 *in vivo* in an unrelated heterologous system using the *E. coli* split GFP assay (Wilson *et al.*,  
235 2004). Clearly discernible filamentous-like structures (reminiscent of FilP-GFP (Bagchi *et al.*,  
236 2008)) could be detected upon co-expression of ZicK and ZacK C-terminally fused to the split  
237 GFP products (ZicK-NGFP and ZacK-CGFP; Supplementary Fig. 5). This is in agreement with  
238 the lack of discernible structures upon expression of N-terminally GFP-fused ZicK and ZacK  
239 in *Anabaena* and is also in concert with the essential N-terminal domain for polymerization of  
240 IF and IF-like proteins (Heins and Aebi, 1994; Cabeen *et al.*, 2009; Cabeen *et al.*, 2011).  
241 Nonetheless, some indications for heteropolymerization were also present upon co-expression

242 of NGFP-ZicK with ZacK-CGFP, which is in agreement with the BACTH results that indicated  
243 that both, N and C-terminal fusions of ZicK and ZacK are potentially able to interact with each  
244 other (Fig. 2B). The different heteropolymerization phenotype of ZicK/ZacK polymer in *E. coli*  
245 and *Anabaena* suggests that there are other so far unknown factors that modulate the specific  
246 ZicK/ZacK heteropolymerization phenotype, as shown in the following section.

#### 247 **Deletion of *zicK* and *zacK* leads to defects in trichome and cell shape and *Anabaena*** 248 **viability**

249 In contrast to the obtained  $\Delta zicK\Delta zacK$  double mutant, single  $\Delta zicK$  or  $\Delta zacK$  mutant strains  
250 could not be generated, suggesting that the presence (or absence) of ZicK or ZacK alone is  
251 lethal for *Anabaena*. Further investigating the  $\Delta zicK\Delta zacK$  mutant phenotype revealed an  
252 altered trichome and cell shape phenotype and a reduced trichome viability (Fig. 4). Unlike the  
253 linear trichome growth pattern of the WT, the  $\Delta zicK\Delta zacK$  mutant strain grew as zigzagged  
254 trichomes (Fig. 4A), a phenotype that could be rescued by heterologous expression of  
255  $P_{zicK}::zicK-zacK$  from pRL25C but not from  $P_{zicK}::zicK-ecfp+zacK-gfp$  (Supplementary Figs, 4C  
256 and 6A). Additionally,  $\Delta zicK\Delta zacK$  cells were significantly larger (WT:  $27.42 \pm 14.75 \mu\text{m}^3$ ;  
257  $\Delta zicK\Delta zacK$ :  $32.52 \pm 12.54 \mu\text{m}^3$ ; P: <0.0001; Student's t test) and significantly more round  
258 (WT:  $0.8063 \pm 0.1317$ ;  $\Delta zicK\Delta zacK$ :  $0.8530 \pm 0.1130$ ; P: <0.0001; Student's t test) in  
259 comparison to the WT (Fig. 4B,C), reminiscent of the  $\Delta mreB$  mutant strain (Hu *et al.*, 2007).  
260 The round and swollen cell phenotypes of the  $\Delta zicK\Delta zacK$  mutant strains are indicative of an  
261 impairment in cell wall integrity and/or defects in PG biogenesis as well as an elevated  
262 sensitivity to turgor pressure (Fenton *et al.*, 2016; Rojas and Huang, 2018). Consequently, we  
263 tested for an elevated sensitivity of the  $\Delta zicK\Delta zacK$  mutant to cell wall damaging enzymes.  
264 This showed that the  $\Delta zicK\Delta zacK$  mutant is slightly more sensitive to Proteinase K treatment  
265 but was unaffected by lysozyme treatment and still retained the ability to grow diazotrophically  
266 (*i.e.*, on BG11<sub>0</sub> plates) (Fig. 4D) and to form heterocysts (Supplementary Fig. 6B). More  
267 importantly, however, we found that the  $\Delta zicK\Delta zacK$  mutant lost the ability to grow in liquid  
268 culture (with and without agitation; Fig. 4E), which could be complemented with pRL25C

269 carrying  $P_{zicK}::zicK-zacK$  (Supplementary Fig. 6C), hinting for an elevated sensitivity to fluid  
270 shear stress or turgor pressure.

### 271 **ZicK and ZacK interact with proteins involved in cell shape and trichome integrity**

272 Considering the impact of the deletion of *zicK* and *zacK* on cell and trichome shape and the  
273 assumed septal docking of the ZicK/ZacK heteropolymer, we next wanted to investigate  
274 whether both, ZicK and ZacK physically interact with other proteins known to function in cell  
275 shape determination and cell-cell communication. Using the BACTH assay, we found that both,  
276 ZicK and ZacK, interacted with the divisome-associated septal protein SepI (Springstein *et al.*,  
277 2020a), the septal protein SepJ (Flores *et al.*, 2007), the cell shape-determining protein MreB  
278 as well an elongasome associated protein (ZipM; covered in more detail in subsequent study)  
279 and the *Anabaena* homolog to HmpF (here named HmpF<sub>Ana</sub>), whose homologs were shown to  
280 be involved in motility in *Nostoc punctiforme* ATCC 29133 (Cho *et al.*, 2017) and *Synechocystis*  
281 sp. PCC 6803 (Bhaya *et al.*, 2001; Springstein *et al.*, 2020b) (Fig. 5A). No interactions were  
282 found with FtsZ, FraC and FraD (Supplementary Fig. 7). We attempted to further confirm our  
283 interaction results with affinity co-elution experiments but found that Ni-NTA-bound ZicK and  
284 ZacK purified from *E. coli* readily precipitated upon transfer from denaturing to native buffer  
285 conditions, precluding further co-elution studies. Additionally, we observed that non-denaturing  
286 conditions failed to purify overexpressed CCRPs from *E. coli*, confirming their inherent  
287 insoluble nature, a property known to eukaryotic IFs (Kelemen, 2017). Instead, we surveyed  
288 for further interaction partners by anti-GFP co-immunoprecipitation experiments of *Anabaena*  
289 cells expressing ZicK-GFP and analysed co-precipitated proteins by LC-MS/MS analytics (all  
290 27 identified possible interactors are listed in Supplementary File 3). This analysis confirmed  
291 that ZicK and ZacK interact with each other *in vivo* and further strengthened the observed  
292 association of ZicK with MreB (Fig. 5B). Furthermore, ZicK co-precipitated ParA (Fig. 5B), a  
293 walker A-type ATPase, involved in chromosome and plasmid partitioning (Lutkenhaus, 2012)  
294 and AII4051 (also termed AnAKb), a protein associated with low-temperature resistance and  
295 potentially involved in cryoprotectant production (Ehira *et al.*, 2005).



## 296 **Deletion of *zicK* and *zacK* affects the localization of MreB and the chromosomes**

297 As our BACTH analysis identified SepI and SepJ as interaction partners, and both proteins are  
298 involved in intercellular transport and cell-cell communication in *Anabaena* (Mullineaux *et al.*,  
299 2008; Springstein *et al.*, 2020a), we proceeded to test whether the  $\Delta zicK\Delta zacK$  mutant is also  
300 affected in solute diffusion using fluorescence recovery after photobleaching (FRAP)  
301 experiments of calcein stained  $\Delta zicK\Delta zacK$  mutant. However, this analysis did not reveal any  
302 defect in cell-cell communication in the  $\Delta zicK\Delta zacK$  mutant (Supplementary Fig. 8A-C) and  
303 hence ZicK and ZacK do not affect septal junction functionality. Additionally, electron  
304 microscopy of ultrathin sections of the  $\Delta zicK\Delta zacK$  mutant, did not show any discernible  
305 differences in the ultrastructure of the cells compared to cells of *Anabaena* WT (Supplementary  
306 Fig. 8D). In accordance with a lack of interaction between FtsZ and ZicK/ZacK, FtsZ placement  
307 was unaffected in the  $\Delta zicK\Delta zacK$  mutant as shown using anti-FtsZ immunofluorescence  
308 (Supplementary Fig, 9A). Following the lead of ZicK/ZacK interaction partners, we next  
309 analysed the localization of MreB in the *Anabaena* WT and the  $\Delta zicK\Delta zacK$  mutant using a  
310 functional  $P_{petE}::gfp$ -mreB fusion (Hu *et al.*, 2007). In *Anabaena* WT, we observed GFP-MreB  
311 filaments throughout the cells without any directional preferences and sometimes forming local  
312 foci (Fig. 6A). Even though GFP-MreB filaments were present in the  $\Delta zicK\Delta zacK$  mutant strain  
313 (Fig. 6A inlay), we only detected those filaments in non-rounded cells that seemingly had a  
314 WT-like phenotype (Fig 6A), accounting for 24% of counted cells (245 of 1040 cells counted),  
315 whereas in rounded/swollen cells of zigzagged trichomes, the GFP-MreB signals were  
316 restricted to the cell poles (Fig. 6A), accounting for 76% of counted cells (795 of 1040 counted  
317 cells). To further investigate the potential effect of *zicK* and *zacK* deletion on MreB and hence  
318 elongasome function, we stained sites of active cell wall biosynthesis using a fluorescent  
319 vancomycin derivate (Van-FL; (Daniel and Errington, 2003)). The staining pattern between the  
320 WT and the  $\Delta zicK\Delta zacK$  mutant was indistinguishable but the fluorescence intensity levels  
321 were slightly decreased in the  $\Delta zicK\Delta zacK$  mutant (Supplementary Fig. 9B,C). Nonetheless,

322 this is likely accounted for by the reduced growth rate of the  $\Delta zicK\Delta zacK$  mutant (Fig. 4D and  
323 general observation on growth plates).

324         Considering the interaction of ZicK/ZacK with ParA, we further tested for a function of  
325 ZicK and ZacK in DNA placement and compared the DNA distribution in the WT and the  
326  $\Delta zicK\Delta zacK$  mutant as measured by distribution of 4',6-Diamidin-2-phenylindol (DAPI) staining  
327 intensity (Fig. 6B,C). For that, we calculated the width of the DAPI focal area as the range of  
328 DAPI staining around the maximum intensity focus ( $\pm 10$  grey intensity in arbitrary units). This  
329 revealed that the staining focal area size was significantly different among the WT and the  
330  $\Delta zicK\Delta zacK$  mutant. The DAPI signal observed in the  $\Delta zicK\Delta zacK$  mutant appears more  
331 condensed, and indeed, the  $\Delta zicK\Delta zacK$  mutant focal DAPI area was smaller than the WT  
332 (Fig. 6C). Unlike the WT, DAPI signals in the  $\Delta zicK\Delta zacK$  mutant was also observed between  
333 two neighbouring cells (Fig. 6B). Overall our results suggest the involvement of ZicK/ZacK in  
334 DNA distribution and segregation in dividing cells.

## 335 **Discussion**

336 Here we provide evidence for the capacity of two *Anabaena* CCRPs, which we termed ZicK  
337 and ZacK, to form polymers *in vitro* and *in vivo*. While the previously described prokaryotic  
338 filament-forming CCRPs formed homopolymers (Ausmees *et al.*, 2003; Yang *et al.*, 2004;  
339 Bagchi *et al.*, 2008; Specht *et al.*, 2011), ZicK and ZacK exclusively assembled into a  
340 heteropolymer *in vitro* and *in vivo*, thus revealing a new property of bacterial CCRPs. The  
341 inherent heteropolymerization tendency of ZicK and ZacK was confirmed in a heterologous  
342 and evolutionary distant *E. coli* system, which was previously used to investigate other known  
343 CCRPs such as Scc from *Leptospira biflexa* (England *et al.*, 2005) or Crescentin (Ingerson-  
344 Mahar *et al.*, 2010). Although heteropolymerization has previously been described for  
345 prokaryotic cytoskeletal proteins, none of those polymerization pairs both belonged to the  
346 group of CCRPs. BacA and BacB, members of the widely conserved class of bactofilins, both  
347 independently polymerize into filaments *in vitro*, co-localize *in vivo* in *C. crescentus* and interact  
348 directly with each other as indicated by co-immunoprecipitation analysis (Kühn *et al.*, 2010).

349 Unlike CCRPs, whose self-interaction is based on the high degree of CC domains, in  
350 bactofilins, the DUF583 domain is proposed to mediate protein polymerization (Kühn *et al.*,  
351 2010). Despite compelling evidence for co-assembly and shared functional properties,  
352 heteropolymerization of BacA and BacB hasn't been studied *in vitro*. Another interesting pair  
353 of potential co-polymerizing cytoskeletal proteins that both independently assemble into  
354 homopolymers but also co-align *in vivo* and affect each other's properties are Crescentin and  
355 the CtpS enzyme from *C. crescentus* (Ingerson-Mahar *et al.*, 2010). Although, again, the co-  
356 assembly *in vitro* is not reported in the literature.

357         Despite the numerous independently confirmed heteropolymerization properties of  
358 ZicK and ZacK, we note, however, that the results from our *in vivo* experiments are based on  
359 artificial expression of the two CCRPs. We hypothesize that the absence of a ZicK/ZacK  
360 heteropolymer in strains expressing ZicK-GFP or ZacK-GFP alone (with the WT *zicK* and *zacK*  
361 alleles still present) may be due to a dosage-dependent effect, where the presence of unequal  
362 concentration of ZicK or ZacK in the cell leads to protein aggregates. Our observation of ZicK-  
363 GFP or ZacK-GFP aggregates when they were expressed alone in the  $\Delta zicK\Delta zacK$  mutant  
364 strain supports the dosage effect hypothesis. Also, in our *in vitro* polymerization assay, ZicK  
365 and ZacK only formed clear and distinct filament-like structures when both proteins are present  
366 in equal concentrations. Nonetheless, co-expressed of ZicK-eCFP and ZacK-GFP were not  
367 able to complement the  $\Delta zicK\Delta zacK$  mutant. Attempts to express both proteins fused to a  
368 fluorophore from the native promoter remained unsuccessful, possibly a result of the close  
369 genomic proximity. Furthermore, the genomic neighbourhood of *zicK* and *zacK* suggests that  
370 the ZicK/ZacK heteropolymer formation could be relying on co-translational assembly (e.g., as  
371 observed for LuxA/LuxB (Shieh *et al.*, 2015)). Co-translational assembly of natively present  
372 ZicK and ZacK would lead to an efficient binding of the two subunits such that the additional  
373 expression of one unit only in excess (*i.e.*, ZicK-GFP or ZacK-GFP alone) would lead to the  
374 formation of aggregates. As such, it remains to be elucidated to what extent the ZicK/ZacK  
375 heteropolymer exists in *Anabaena*. Although, we could not identify any protein filaments in our  
376 ultrathin sections from *Anabaena* WT, other studies have previously described filamentous

377 strings and even longitudinal cell-spanning polymers in multicellular *Anabaena* and *Nostoc*  
378 strains (Jensen and Ayala, 1980; Bermudes *et al.*, 1994). Despite compelling evidence for the  
379 existence of a cyanobacterial Z-ring structure during cell division (Sakr *et al.*, 2006b; Sakr *et*  
380 *al.*, 2006a; Ramos-León *et al.*, 2015; MacCready *et al.*, 2017; Corrales-Guerrero *et al.*, 2018;  
381 Camargo *et al.*, 2019), no Z-ring ultrastructures have yet been identified and consequently, the  
382 absence of longitudinal ZicK/ZacK filaments in ultrathin sections does not rule out that they  
383 exist but could rather indicate that they could not be visualized yet.

384 Our results indicate that ZicK and ZacK are associated with the elongasome (through  
385 their interaction with MreB) and proteins in the septal cell wall (through the interaction with  
386 SepJ and SepI) and affect cellular DNA placement (Fig. 7). A function of ZicK/ZacK in  
387 chromosome segregation, would be in concert with the identified interaction of ZicK with ParA,  
388 this, however, remains to be elucidated as it could also be an indirect consequence of the  
389 swollen/rounded cell shape in the  $\Delta zicK\Delta zacK$  mutant. Nonetheless, so far no chromosome  
390 partitioning system has yet been identified in multicellular cyanobacteria (Hu *et al.*, 2007). In  
391 *E. coli*, *B. subtilis* and *C. crescentus*, MreB functions in chromosome segregation while deletion  
392 of *mreB* did not affect chromosome segregation in *Anabaena* but induced a swollen cell  
393 phenotype (Hu *et al.*, 2007), similar to the  $\Delta zicK\Delta zacK$  mutant. Consequently, MreB and  
394 ZicK/ZacK likely share functional properties but are not exclusively involved in the same  
395 cellular processes. Swollen cell morphotypes were also described for *Anabaena* or  
396 *Synechocystis* mutants lacking penicillin binding proteins (PBPs), which are enzymes that are  
397 directly involved in cell wall biogenesis through the modification of the PG layer (Lázaro *et al.*,  
398 2001; Leganés *et al.*, 2005; Burnat *et al.*, 2014). This presumed link of ZicK/ZacK to the actin-  
399 like MreB cytoskeleton and the PG biogenesis apparatus is also indicated by the altered  
400 localization of GFP-MreB and the decreased PG staining intensity in the  $\Delta zicK\Delta zacK$  mutant  
401 strain. Consequently, ZicK and ZacK might indirectly act to positively regulate PG biogenesis,  
402 although, we cannot exclude that the reduced staining intensity in the  $\Delta zicK\Delta zacK$  mutant  
403 simply reflects the slower growth rate of this strain. An interaction or involvement of prokaryotic  
404 filament-forming CCRPs with MreB and PG synthesis were previously observed in other

405 bacteria. Examples are the gliding motility in *Myxococcus xanthus*, where a multiprotein  
406 complex, including the filament-forming CCRP AglZ and MreB, were found to coordinate type  
407 A-motility (Schumacher and Søgaard-Andersen, 2017). Similarly, the curved morphotype of *C.*  
408 *crescentus* is induced by Crescentin, which functionally associates with MreB and likely  
409 modulates PG biogenesis by exerting local mechanical forces to the cell membrane (Charbon  
410 *et al.*, 2009; Lin and Thanbichler, 2013). Other aspects like a decreased cell envelope  
411 permeability of the  $\Delta zicK\Delta zack$  mutant are also conceivable, although we did not detect any  
412 cell wall defects in the  $\Delta zicK\Delta zack$  mutant. MreB and the elongasome are the main  
413 determinants of the PG exoskeleton, which provides the cell with structural integrity and  
414 resistance to turgor pressure (Typas *et al.*, 2012). The lack of liquid growth of the  $\Delta zicK\Delta zack$   
415 mutant would also argue for a defect in the resistance to turgor pressure.

416         Together with the cell shape-determining protein MreB, ZicK and ZackK could possibly  
417 contribute to normal cell shape and relay trichome shape-stabilizing properties to neighbouring  
418 cells in the trichome by means of their association with the filament stabilizing protein SepJ  
419 (Fig. 7). As such, they are important for maintaining the linear *Anabaena* trichome phenotype.  
420 ZicK and ZackK polymers might constitute stabilizing platforms or scaffolds for other  
421 proteinaceous structures, similarly to the stabilizing function of the eukaryotic cytoskeleton for  
422 cell-cell contacts (*i.e.*, desmosomes). Furthermore, ZicK shares *in silico* predicted structural  
423 similarities with the spectrin repeats of plectin, a well-described eukaryotic cytolinker protein.  
424 Plectin link the three eukaryotic cytoskeletal systems (actin filaments, microtubules and IFs),  
425 thereby contributing to the resistance to deformation of vertebrate cells (Alberts *et al.*, 2014).  
426 They stabilize desmosomes and are hence directly involved in cell-cell contact integrity (Leung  
427 *et al.*, 2002). An analogous cytolinker function of ZicK could explain why ZackK alone did not  
428 form properly folded protein filaments on its own and suggests that ZackK requires ZicK as the  
429 linking protein for polymerization. As plectin not only stabilizes but also dynamically  
430 disassembles IF protein filaments (*i.e.*, vimentin) in a concentration-dependent manner  
431 (Birchler *et al.*, 2001), this would further support a dosage-dependent effect of ZicK and ZackK  
432 for heteropolymerization.

433           The conserved combination of ZicK and Zack in heterocystous cyanobacteria that form  
434 linear trichomes (Fig. 1C, Supplementary File 2) highlights a potential function of ZicK and  
435 Zack for the maintenance of the linear trichome. The  $\Delta zicK\Delta zack$  mutant had a zigzagged  
436 phenotype and was unable to grow in liquid culture. We hypothesize that the loss of trichome  
437 linear shape led to an increase in accessible surface for the acting mechanical forces in liquid  
438 (Persat *et al.*, 2015), including fluid shear stress (Park *et al.*, 2011), ultimately resulting in forces  
439 that cannot be endured by the abnormal mutant trichomes. The loss of ZicK and/or Zack in  
440 heterocystous cyanobacteria species that are in symbiosis (e.g., *N. azollae*) or form true-  
441 branching or multiseriate filaments (e.g., *Fischerella* or *Chlorogloeopsis*, respectively) may  
442 suggest that these species are less sensitive to mechanical stress (i.e., due to their interaction  
443 with the host or complex filament formation). The key hallmarks of permanent bacterial  
444 multicellularity are morphological differentiation and a well-defined and reproducible shape,  
445 termed patterned multicellularity (Claessen *et al.*, 2014). Besides the highly reproducible cell  
446 division, proliferation and cell differentiation in sporulating actinomycetes (Flårdh *et al.*, 2012),  
447 the reproducible linear trichomes in filamentous cyanobacteria are considered a major  
448 contributor to the cyanobacterial patterned multicellularity (Claessen *et al.*, 2014; Herrero *et*  
449 *al.*, 2016), manifesting a selective advantage to biotic and abiotic environmental factors  
450 (Young, 2006; Singh and Montgomery, 2011). Our results indicate that ZicK and Zack serve  
451 as regulators of the typical linear *Anabaena* trichome and as such as regulators of *Anabaena*  
452 patterned multicellularity. The evolution of patterned multicellularity is considered an important  
453 step towards a sustainable division of labour and the development of cell differentiation  
454 (Claessen *et al.*, 2014). Our study provides initial evidence for a role of two heteropolymer-  
455 forming CCRPs in the evolution and maintenance of cyanobacterial multicellular forms.

## 456 **Acknowledgments**

457 We thank Myriam Barz, Katrin Schumann, Lisa-Marie Philipp, Lisa Stuckenschneider and  
458 Claudia Menzel for their assistance in the experimental work and Andreas Tholey for help with  
459 the mass spectrometry analysis. FRAP experiments were performed at the Facility for Imaging

460 by Light Microscopy (FILM) at Imperial College London. This study was supported by the  
461 German science foundation (DFG) (Grant No. STU513/2-1) and a Fondecyt Grant (Grant No.  
462 11170842), both awarded to KS. IM was supported by German science foundation (DFG)  
463 (Grant SFB766). DJN was supported by the BBSRC as part of the joint NSF Ideas Lab grant  
464 on 'Nitrogen: improving on nature' (Grant No. BB/L011506/1).

#### 465 **Author contribution**

466 BLS and KS designed the study. BLS established and performed the experimental work with  
467 contributions from MLT and JW. CW and TD performed comparative genomics analysis. DJN  
468 performed FRAP assays and IM carried out ultratstructure analyses. AOH and AT analysed  
469 protein samples by mass spectrometry. BLS, TD and KS drafted the manuscript with  
470 contributions from all co-authors.

#### 471 **Competing interests**

472 The authors declare no competing interests.

#### 473 **Data availability**

474 All data generated or analysed during this study are included in this published article (and its  
475 supplementary files).



## 476 **Material and methods**

### 477 *Bacterial strains and growth conditions*

478 *Anabaena* sp. PCC 7120 was obtained from the Pasteur Culture Collection (PCC) of  
479 cyanobacteria (France). Cells were grown photoautotrophically in BG11 or without combined  
480 nitrogen (BG11<sub>0</sub>) at constant light with a light intensity of 30  $\mu\text{mol m}^{-2} \text{s}^{-1}$  in liquid culture or on  
481 agar plates (1.5% w/v agar). When appropriate, 5  $\mu\text{g ml}^{-1}$  spectinomycin (Sp), 5  $\mu\text{g ml}^{-1}$   
482 streptomycin (Sm) or 30  $\mu\text{g ml}^{-1}$  neomycin (Nm) was added to strains carrying respective  
483 plasmids or chromosomal insertions. In some cases, basal copper-regulated *petE*-driven  
484 expression of gene candidates in *Anabaena* cells was lethal or growth inhibiting, therefore  
485 these strains were grown in BG11 without copper and protein expression was later induced by  
486 the addition of  $\text{CuSO}_4$  at indicated concentrations to the culture. *E. coli* strains DH5 $\alpha$ ,  
487 DH5 $\alpha$ MCR, XL1-blue and HB101 were used for cloning and conjugation by triparental mating.  
488 BTH101 was used for BACTH system and BL21 (DE3) was used for expression of His<sub>6</sub>-tagged  
489 proteins in *E. coli*. All *E. coli* strains were grown in LB medium containing the appropriate  
490 antibiotics at standard concentrations. Supplementary Tables 1-4 list all used bacterial strains,  
491 plasmids and oligonucleotides.

### 492 *Prediction of coiled-coil-rich proteins*

493 Genome sequence of *Anabaena* (GCA\_000009705.1) was analysed by the COILS algorithm  
494 (Lupas *et al.*, 1991) as previously described (Bagchi *et al.*, 2008). The algorithm was run with  
495 a window width of 21 and the cut-off for amino acids in coiled-coil conformation was set to  $\geq 80$   
496 amino acid residues. The resulting set of protein candidates was further manually examined  
497 with online available bioinformatic tools, including NCBI Conserved Domain Search (Boratyn  
498 *et al.*, 2012), NCBI BLAST (Altschul *et al.*, 1990), TMHMM (Sonnhammer *et al.*, 1998) and I-  
499 TASSER (Zhang, 2009). Protein candidates exhibiting BLAST hits involved in cytoskeletal  
500 processes or similar domain architectures as known IF and IF-like proteins like Crescentin,  
501 FilP, vimentin, desmin or keratin were selected, and enzymatic proteins as well as proteins  
502 predicted to be involved in other cellular processes were excluded.

503 *Distribution of homologs in cyanobacteria*

504 Homologs to the *Anabaena* proteins were extracted from pre-calculated cyanobacterial protein  
505 families (Springstein *et al.*, 2020b). Conserved syntenic blocks (*i.e.*, gene order) were identified  
506 using CSBFinder-S (Svetlitsky *et al.*, 2020).

507 *RNA isolation and cDNA synthesis*

508 RNA from *Anabaena* WT was isolated using the Direct-zol™ RNA MiniPrep Kit (Zymo  
509 Research) according to the manufacturer's instructions. RNA was isolated in technical  
510 triplicates from 10 ml cultures. Isolated RNA was treated with DNA-free™ Kit (2 units  
511 rDNAs/reaction; Thermo Fischer Scientific) and 200 ng RNA was reverse transcribed using  
512 the qScript™ cDNA Synthesis Kit (Quanta Biosciences). RT-PCR of cDNA samples for *rnpB*,  
513 *zicK*, *zacK* and *zicK+zacK* was performed using primer pairs #1/#2, #3/#4, #5/#6 and #3/#8,  
514 respectively.

515 *Transformation*

516 *Anabaena* was transformed by triparental mating as previously described (Ungerer and  
517 Pakrasi, 2016). Briefly, 100 µl of overnight cultures of DH5α carrying the conjugal plasmid  
518 pRL443 and DH5αMCR carrying the cargo plasmid and the helper plasmid pRL623, encoding  
519 for three methylases, were mixed with 200 µl *Anabaena* culture (for transformation into the  
520  $\Delta zicK\Delta zacK$  mutant, cells were scraped from the plate and resuspended in 200 µl BG11). This  
521 mixture was directly applied onto sterilized nitrocellulose membranes (Amersham Protran 0.45  
522 NC) placed on top of BG11 plates supplemented with 5% (v/v) LB medium. Cells were  
523 incubated in the dark at 30 °C for 6-8 h with subsequent transfer of the membranes to BG11  
524 plates and plates were placed under standard growth conditions. After 24 h, membranes were  
525 transferred to BG11 plates supplemented with appropriate antibiotics.

526 *Plasmid construction*

527 Ectopic expression of *Anabaena* protein candidates was achieved from a self-replicating  
528 plasmid (pRL25C (Wolk *et al.*, 1988)) under the control of the copper-inducible *petE* promoter  
529 ( $P_{petE}$ ) or the native promoter (predicted by BPROM (Solovyev and Salamov, 2011)) of the  
530 respective gene. All constructs were verified by Sanger sequencing (Eurofins Genomics).  
531 Plasmids were created using standard restriction enzyme-based techniques or Gibson  
532 assembly. Information about precise plasmid construction strategies are available from the  
533 authors upon request.

534 *Anabaena mutant strain construction*

535 The  $\Delta zick\Delta zack$  mutant strain was generated using the pRL278-based double homologous  
536 recombination system employing the conditionally lethal *sacB* gene (Cai and Wolk, 1990). For  
537 this, 1500 bp upstream and downstream of *zick-zack* were generated by PCR from *Anabaena*  
538 gDNA. Upstream region of *zick* was amplified using primers #97/#98 and downstream region  
539 of *zack* was amplified using primers #99/#100. The respective upstream and downstream  
540 homology regions flanking the CS.3 cassette (amplified with primer #95/#96 from pCSEL24)  
541 were then inserted into PCR-amplified pRL278 (using primer #93/#94) by Gibson assembly,  
542 yielding pTHS166. *Anabaena* transformed with pTHS166 plasmids was subjected to several  
543 rounds of re-streaking on new plates (about 5-8 rounds). To test for fully segregated clones,  
544 colony PCRs were performed. For this, *Anabaena* cells were resuspended in 10  $\mu$ l sterile H<sub>2</sub>O  
545 of which 1  $\mu$ l was used for standard PCR with internal *zick* and *zack* gene primers #3/#6.  
546 Correct placement of the CS.3 cassette was then further confirmed using CS.3 cassette  
547 primers with binding sites outside of the 5' and 3' flanks used for homologous recombination  
548 (primers #95/#102 and #101/#96).

549 *Fluorescence microscopy*

550 Bacterial strains grown in liquid culture were either directly applied to a microscope slide or  
551 previously immobilized on a 2% (w/v) low-melting agarose in PBS (10 mM Na<sub>2</sub>HPO<sub>4</sub>, 140 mM

552 NaCl, 2.7 mM KCl, 1.8 mM KH<sub>2</sub>PO<sub>4</sub>, pH 7.4) agarose pad and air dried before microscopic  
553 analysis. Epifluorescence was done using an Axio Imager.M2 light microscope (Carl Zeiss)  
554 equipped with Plan-Apochromat 63x/1.40 Oil M27 objective and the AxioCam MR R3 imaging  
555 device (Carl Zeiss). GFP, Alexa Fluor 488 and BODIPY™ FL Vancomycin (Van-FL)  
556 fluorescence was visualized using filter set 38 (Carl Zeiss; excitation: 470/40 nm band pass  
557 (BP) filter; emission: 525/50 nm BP). Chlorophyll auto-fluorescence was recorded using filter  
558 set 15 (Carl Zeiss; excitation: 546/12 nm BP; emission: 590 nm long pass). When applicable,  
559 cells were previously incubated in the dark at RT for about 5 min with 10 µg ml<sup>-1</sup> DAPI (final  
560 concentration) to stain intracellular DNA. For visualization of DAPI fluorescence filter set 49  
561 (Carl Zeiss; excitation: G 365 nm; emission: 455/50 nm) was employed. For confocal laser  
562 scanning microscopy, the LSM 880 Axio Imager 2 equipped with a C-Apochromat 63x/1.2 W  
563 Korr M27 objective and an Airyscan detector (Carl Zeiss) was used and visualization of GFP,  
564 eCFP and chlorophyll auto-fluorescence was done using Zen black smart setup settings.

#### 565 *Transmission electron microscopy*

566 For ultra-structure analysis, *Anabaena* trichomes were fixed with 2.5% (v/v) glutaraldehyde,  
567 immobilized in 2% (w/v) agarose, treated with 2% (v/v) potassium permanganate and  
568 dehydrated through a graded ethanol series (Mohr *et al.*, 2010). The fixed cells were infiltrated  
569 by ethanol:EPON (2:1 to 1:2 ratio) and embedded in pure EPON. Ultrathin sections were  
570 prepared with a Leica UC6i Ultramicrotome, transferred to formvar coated copper grids  
571 (Science Services GmbH München) and post-stained with uranyl acetate and lead citrate  
572 (Fiedler *et al.*, 1998). Micrographs were recorded at a Philips Tecnai10 electron microscope at  
573 80 kV.

#### 574 *Calcein labelling and fluorescence recovery after photobleaching (FRAP) experiments*

575 For FRAP experiments, *Anabaena* WT and  $\Delta zick\Delta zack$  mutant strain were grown on BG11  
576 plates, resuspended in BG11 liquid media and washed three times in 1 ml BG11 (3,000 x g, 5  
577 min). Cells were then resuspended in 0.5 ml BG11 and incubated with 10 µl calcein-AM  
578 (Cayman Chemical, 1 mg ml<sup>-1</sup> in DMSO) for 1 h at 30 °C in the dark. To remove excess staining

579 solution the cells were washed four times with 1 ml BG11. Subsequently, the cells were spotted  
580 on BG11 agar for visualization by confocal laser scanning microscopy (Leica TCS SP5; HCX  
581 PL APO 63x 1.40-0.60 OIL CS). Calcein was excited at 488 nm and fluorescence emission  
582 monitored in the range from 500 to 530 nm with a maximally opened pinhole (600  $\mu\text{m}$ ). FRAP  
583 experiments were carried out by an automated routine as previously described (Mullineaux *et*  
584 *al.*, 2008). After recording an initial image, selected cells were bleached by increasing the laser  
585 intensity by a factor of 5 for two subsequent scans and the fluorescence recovery followed in  
586 0.5 s intervals for 30 s was recorded using the Leica LAS X software. Exchange coefficients  
587 (*E*) were then calculated as previously described (Mullineaux *et al.*, 2008; Nieves-Mori3n *et*  
588 *al.*, 2017).

#### 589 *BODIPY™ FL Vancomycin (Van-FL) staining*

590 Van-FL staining of strains grown on BG11 plates was essentially performed as described  
591 previously (Lehner *et al.*, 2013; Rudolf *et al.*, 2015). Briefly, cells were resuspended in BG11  
592 medium, washed once in BG11 by centrifugation (6500  $\times g$ , 4 min, RT) and incubated with 5  
593  $\mu\text{g ml}^{-1}$  Van-FL (dissolved in methanol; Thermo Fischer Scientific). Cells were incubated in the  
594 dark for 1 hour at 30  $^{\circ}\text{C}$ , washed three times with BG11 and immobilized on an agarose pad.  
595 Van-FL fluorescence signals were then visualized using epifluorescence microscopy with an  
596 excitation time of 130 ms. Arithmetic mean fluorescence intensities were recorded from the  
597 septa between two cells with a measured area of 3.52  $\mu\text{m}^2$  using the histogram option of the  
598 Zen blue 2.3 software (Carl Zeiss).

#### 599 *Alcian blue staining*

600 *Anabaena* WT and  $\Delta zicK\Delta zicK$  cells were grown on BG11<sub>0</sub> plates, re-suspended in BG11<sub>0</sub>  
601 liquid medium and stained with 0.05% (w/v) alcian blue (final concentration). Polysaccharide  
602 staining of cells immobilized on an agarose pad was observed with an Axiocam ERc 5s color  
603 camera (Carl Zeiss).

604 *Data analysis*

605 Cell volume and roundness were determined using the imaging software ImageJ (Schneider  
606 *et al.*, 2012), a perfect circle is defined to have a roundness of 1. Cell volume was calculated  
607 based on the assumption of an elliptic cell shape of *Anabaena* cells using the Major Axis and  
608 Minor Axis values given by ImageJ and the formula for the volume of an ellipsoid

609 
$$\left( V = \frac{4}{3} \pi abc \right) = V = \frac{4}{3} \pi \left( \left( \frac{\text{Major Axis}}{2} \right)^2 \frac{\text{Minor Axis}}{2} \right)$$

610 Distribution of DAPI fluorescence signal intensity was analysed in ImageJ with the Plot Profile  
611 option along 151 single cells with the rectangle tool. The resulting grey values were arranged  
612 according to the maximum intensity focus and the width of the DAPI focal area was calculated  
613 as the range of DAPI staining around the maximum ( $\pm 10$  grey value in arbitrary units).  
614 Statistical tests were performed with MatLab© (MathWorks) or GraphPad Prism v.8.

615 *Bacterial two-hybrid and beta galactosidase assays*

616 Chemically competent *E. coli* BTH101 cells were co-transformed with 5 ng of plasmids carrying  
617 the respective T18 and T25 translational fusion constructs, plated onto LB plates  
618 supplemented with 200  $\mu\text{g ml}^{-1}$  X-gal, 0.5 mM IPTG, Amp, Km and grown at 30°C for 24-36 h.  
619 Interactions were quantified by beta-galactosidase assays from three independent colonies.  
620 For this aim, cultures were grown for two days at 20 °C in LB Amp, Km, 0.5 mM IPTG and  
621 beta-galactosidase activity was recorded as described in the manufacturer's instructions  
622 (Euromedex; BACTH System Kit Bacterial Adenylate Cyclase Two-Hybrid System Kit) in a 96  
623 well plate format as previously described (Karimova *et al.*, 2012).

624 *GFP-fragment reassembly assay*

625 Chemically competent *E. coli* BL21 (DE3) were co-transformed with indicated plasmid  
626 combinations, plated on LB Amp, Km and grown over night at 37 °C. Liquid overnight cultures  
627 of single colonies of the respective plasmid-bearing *E. coli* strains were then diluted 1:40 in the  
628 same medium the following day. Cells were grown for 2 h at 37 °C, briefly acclimated to 20 °C

629 for 10 min and protein expression was induced with 0.05 mM IPTG and 0.2% (w/v) L-  
630 arabinose. Pictures of induced cultures grown at 20 °C were taken 48 h after induction.

### 631 *Co-immunoprecipitation*

632 About 20-30 ml of the respective *Anabaena* cultures were pelleted by centrifugation (4800 x g,  
633 10 min, RT), cells were washed twice by centrifugation (4800 x g, 10 min, RT) with 40 ml PBS  
634 and then resuspended in 1 ml lysis buffer (PBS-N: PBS with 1% (v/v) NP-40) supplemented  
635 with protease inhibitor cocktail (PIC; cOmplete™, EDTA-free Protease Inhibitor Cocktail,  
636 Sigma-Aldrich). Cells were lysed using the VK05 lysis kit (Bertin) in a Precellys® 24  
637 homogenizer (3 strokes for 30 s at 6500 rpm) and cell debris was pelleted by centrifugation  
638 (30 min, 21,100 x g, 4 °C). 50 µl µMACS anti-GFP MicroBeads (Miltenyi Biotec) were added  
639 to the resulting cell-free supernatant and incubated for 1 h at 4 °C with mild rotation.  
640 Subsequently, the sample was loaded onto µColumns (Miltenyl Biotec), washed two times with  
641 1 ml lysis buffer and eluted in 50 µl Elution Buffer (50 mM Tris HCl pH 6.8, 50 mM DTT, 1%  
642 (w/v) SDS, 1 mM EDTA, 0.005% (w/v) bromophenol blue, 10% (v/v) glycerol; Miltenyl Biotec).  
643 Samples were stored at -80 °C until further use.

### 644 *Mass spectrometry*

645 Mass spectrometry of co-precipitated proteins was performed as previously described  
646 (Springstein *et al.*, 2020a).

### 647 *Immunofluorescence*

648 Immunolocalization of FtsZ in *Anabaena* WT and  $\Delta zicK\Delta zacK$  mutant was essentially  
649 performed as previously described (Ramos-León *et al.*, 2015). For this, strains were scraped  
650 off from growth plates (BG11 and BG11<sub>0</sub> plates), resuspended in a small volume of distilled  
651 water and air-dried on Polysine® adhesion slides (Menzel) at RT followed by fixation and  
652 permeabilization with 70% ethanol for 30 min at -20 °C. Cells were allowed to air dry for 30  
653 min at RT and then washed two times with PBST (PBS supplemented with 0.1% (v/v) Tween-  
654 20) for 2 min. Unspecific binding sites were blocked for 30 min at RT with blocking buffer (1x



655 Roti®-ImmunoBlock in PBST; Carl Roth) and afterwards rabbit anti-FtsZ (Agrisera; raised  
656 against *Anabaena* FtsZ; 1:150 diluted) antibody in blocking buffer was added to the cells and  
657 incubated for 1.5 h at RT in a self-made humidity chamber followed by five washing steps with  
658 PBST. 7.5 µg ml<sup>-1</sup> (final concentration) Alexa Fluor 488-conjugated goat anti-rabbit IgG (H+L)  
659 secondary antibody (Thermo Fischer Scientific) in blocking buffer was added to the cells and  
660 incubated for 1 h at RT in the dark in a self-made humidity chamber. Subsequently, cells were  
661 washed five times with PBST, air dried and mounted with ProLong™ Diamond Antifade  
662 Mountant (Thermo Fischer Scientific) overnight at 4 °C. Immunolocalization of FtsZ was then  
663 analysed by epifluorescence microscopy.

#### 664 *Spot assays*

665 For spot assays, *Anabaena* WT and  $\Delta zicK\Delta zack$  mutant strain were grown on BG11 growth  
666 plates, resuspended in BG11 liquid medium and adjusted to an OD<sub>750</sub> of 0.4. Cells were then  
667 spotted in triplicates of 5 µl onto the respective growth plates containing either no additives  
668 (BG11 or BG11<sub>0</sub>), 50 µg ml<sup>-1</sup> Proteinase K or 100 µg ml<sup>-1</sup> lysozyme in serial 1/10 dilutions and  
669 incubated under standard growth conditions until no further colonies arose in the highest  
670 dilution.

#### 671 *Protein purification and in vitro filamentation assays*

672 For protein purification, *E. coli* BL21 (DE3) cells carrying His-tagged protein candidates were  
673 grown in overnight cultures at 37 °C and 250 rpm. The next day, overnight cultures were diluted  
674 1:40 in the same medium and grown at 37 °C until they reached an OD<sub>600</sub> of 0.5-0.6. Protein  
675 expression was induced with 0.5 mM IPTG for 3-4 h at 37 °C and 250 rpm. Afterwards, cell  
676 suspensions of 50 ml aliquots were harvested by centrifugation, washed once in PBS and  
677 stored at -80 °C until further use. For *in vitro* filamentation assays, cell pellets were  
678 resuspended in urea lysis buffer (ULB: 50 mM NaH<sub>2</sub>PO<sub>4</sub>, 300 mM NaCl, 25 mM imidazole,  
679 6 M urea; pH 8.0) and lysed in a Precellys® 24 homogenizer (3x 6500 rpm for 30 s) using the  
680 2 ml microorganism lysis kit (VK01; Bertin) or self-packed Precellys tubes with 0.1 mm glass  
681 beads. The resulting cell debris was pelleted by centrifugation at 21,000 x g (10 min, 4 °C) and

682 the supernatant was incubated with 1 ml HisPur™ Ni-NTA resin (Thermo Fischer Scientific)  
683 for 1 h at 4°C in an overhead rotator. The resin was washed five times with 4x resin-bed  
684 volumes ULB and eluted in urea elution buffer (UEB: ULB supplemented with 225 mM  
685 imidazole). Total protein concentration was measured using the Qubit® 3.0 Fluorometer  
686 (Thermo Fischer Scientific). Filament formation of purified proteins was induced by overnight  
687 dialysis against polymerization buffer (PLB: 50 mM PIPES, 100 mM KCl, pH 7.0; HLB: 25 mM  
688 HEPES, 150 mM NaCl, pH 7.4; or 25 mM HEPES pH 7.5) at 20 °C and 180 rpm with three  
689 bath changes using a Slide-A-Lyzer™ MINI Dialysis Device (10K MWCO, 0.5 ml or 2 ml;  
690 Thermo Fischer Scientific). Purified proteins were stained with an excess of NHS-Fluorescein  
691 (dissolved in DMSO; Thermo Fischer Scientific) and *in vitro* filamentation was analysed by  
692 epifluorescence microscopy. The NHS-Fluorescein dye was previously successfully used to  
693 visualize *in vitro* FtsZ and CCRP protein filaments (Camberg *et al.*, 2009; Springstein *et al.*,  
694 2020b). And we note that the His<sub>6</sub>-tag did not impact the *in vitro* polymerization properties of  
695 the CCRP FilP (Javadi *et al.*, 2019), confirming the applicability of our approach.

696 **Figures**

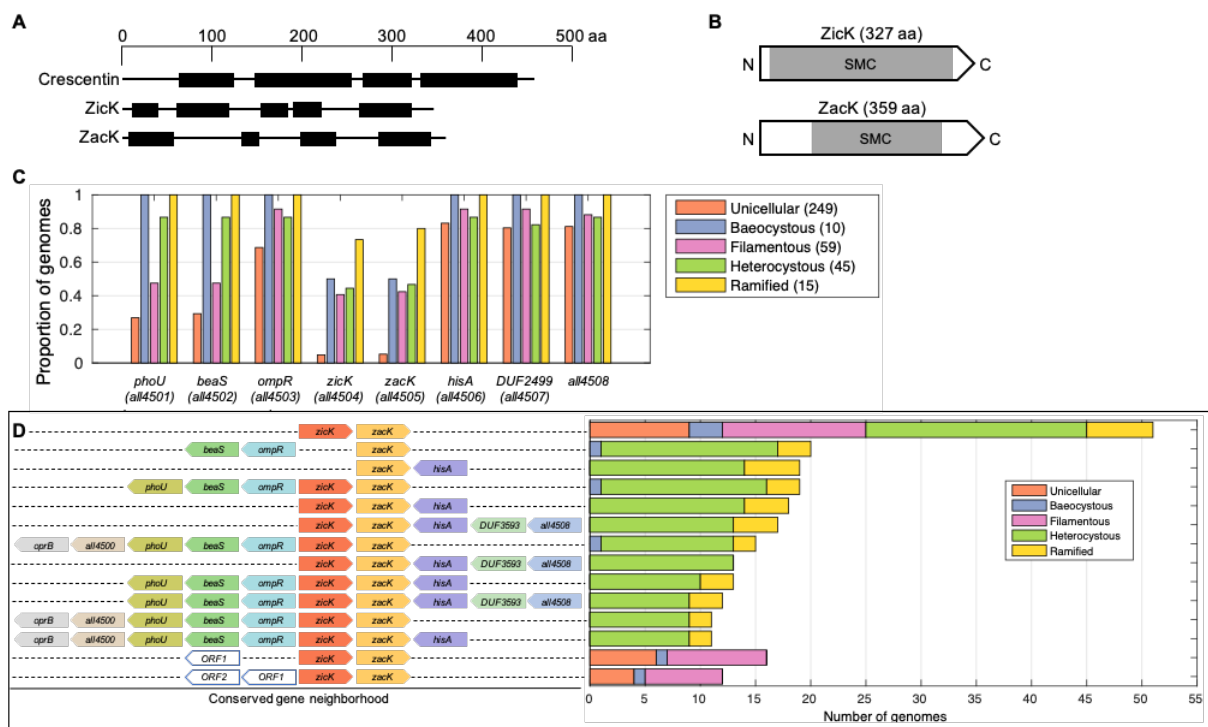

697

698 **Fig. 1: Conservation of ZicK and ZacK among cyanobacterial species and domain architecture**

699 **(A)** Depiction of coiled-coil domains of ZicK and ZacK as identified by the COILS algorithm (Lupas *et*  
700 *al.*, 1991) with a window width of 21. As a comparison, Crescentin from *C. crescentus* is also included.  
701 The scale on top is given in amino acid residues (aa) and amino acid sequences in coiled-coil  
702 conformation are depicted by black bars, while non-coiled-coil sequences are represented by black  
703 lines. **(B)** Schematic depiction of the domain architecture of ZicK and ZacK. The SMC domains predicted  
704 for both proteins are depicted by grey bars. **(C)** The presence of homologs of ZicK/ZacK in cyanobacteria  
705 main types (total number of genomes in the analysis is shown in the legend). Note that the presence of  
706 ZicK/ZacK homologs in baeocystous cyanobacteria is in accordance with a recent suggestion of a  
707 multicellular ancestry of species in that group (Urrejola *et al.*, 2020). **(D)** Genomic neighbourhood of  
708 ZicK/ZacK in cyanobacterial genomes. Conserved syntenic blocks (CSBs; *i.e.*, conserved gene order)  
709 are shown on the left; the number of genomes where the same gene order has been identified is shown  
710 by a bar right of the conserved gene order. Genes with clear annotation or unique locus name are  
711 designated as ORF. Note that the CSBs are not mutually exclusive - *i.e.*, the longer CSBs where  
712 ZicK/ZacK are neighbours (and in the same orientation) include the ZicK/ZacK CSB (1st line on top).  
713 The 2nd line from the top shows the CSB in organisms where ZicK is absent. The two CSBs at the  
714 bottom reveal that the genomic neighbourhood of ZicK/ZacK in non-heterocystous cyanobacteria is  
715 different in comparison to heterocystous cyanobacteria.

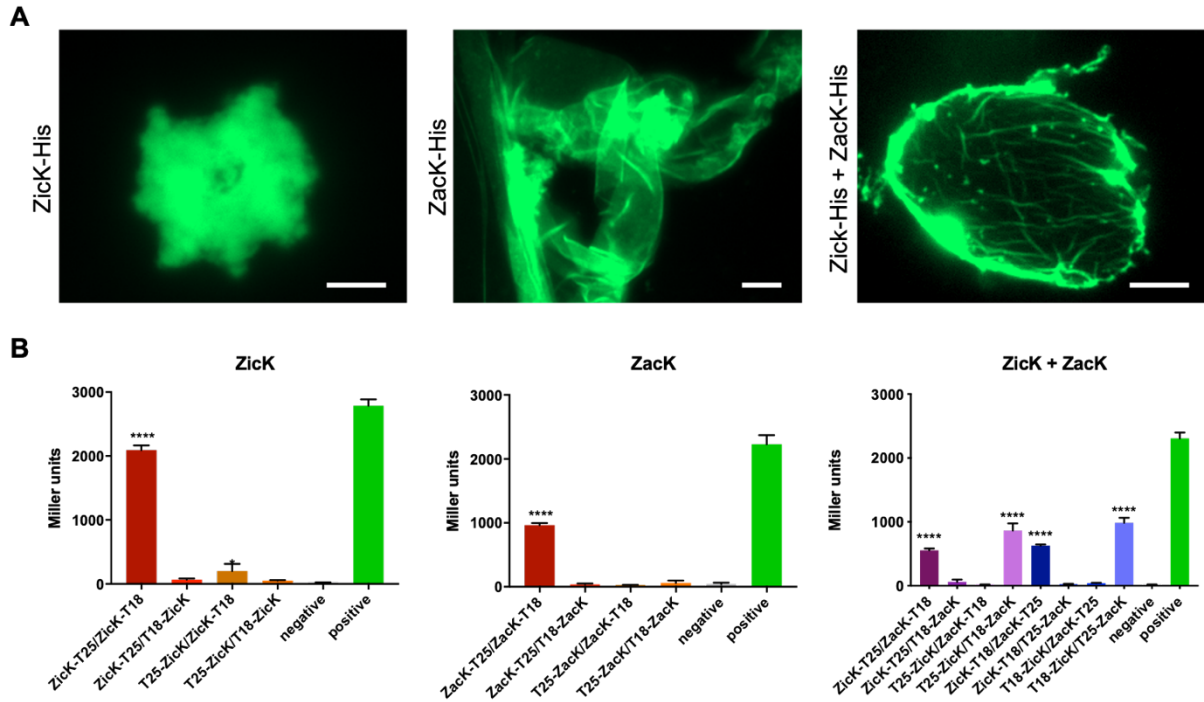

716

717 **Fig. 2: ZicK and ZacK form heteropolymer filament-like structures and interact *in vivo***

718 (A) Epifluorescence micrographs of NHS-Fluorescein-stained *in vitro* structures formed by purified and  
 719 renatured ZicK-His (1 mg ml<sup>-1</sup>), ZacK-His (0.5 mg ml<sup>-1</sup>) or co-renatured ZicK-His and ZacK-His (0.25 mg  
 720 ml<sup>-1</sup> each) in 25 mM HEPES, pH 7.4 (ZacK) or HLB (ZicK and co-renatured ZicK/ZacK) renaturation  
 721 buffer. Note: although ZacK formed somewhat filamentous structures *in vitro*, the vast majority of ZacK  
 722 clumped into aggregates, reminiscent of GroEL1.2 (Supplementary Fig 2). (B) BACTH assays of *E. coli*  
 723 cells co-expressing indicated T25 and T18 translational fusions of all possible pair-wise combinations of  
 724 ZicK and ZacK. *E. coli* cells were subjected to beta-galactosidase assay in triplicates from three  
 725 independent colonies grown for 2 d at 20°C. Quantitative values are given in Miller units, and the mean  
 726 results from three independent colonies are presented. Negative: N-terminal T25 fusion construct of the  
 727 respective protein co-transformed with empty pUT18C. Positive: Zip/Zip control. Error bars indicate  
 728 standard deviations (n = 3). Values indicated with asterisks are significantly different from the negative  
 729 control. \*\*\*\*: p < .0001 (Student's t-test).

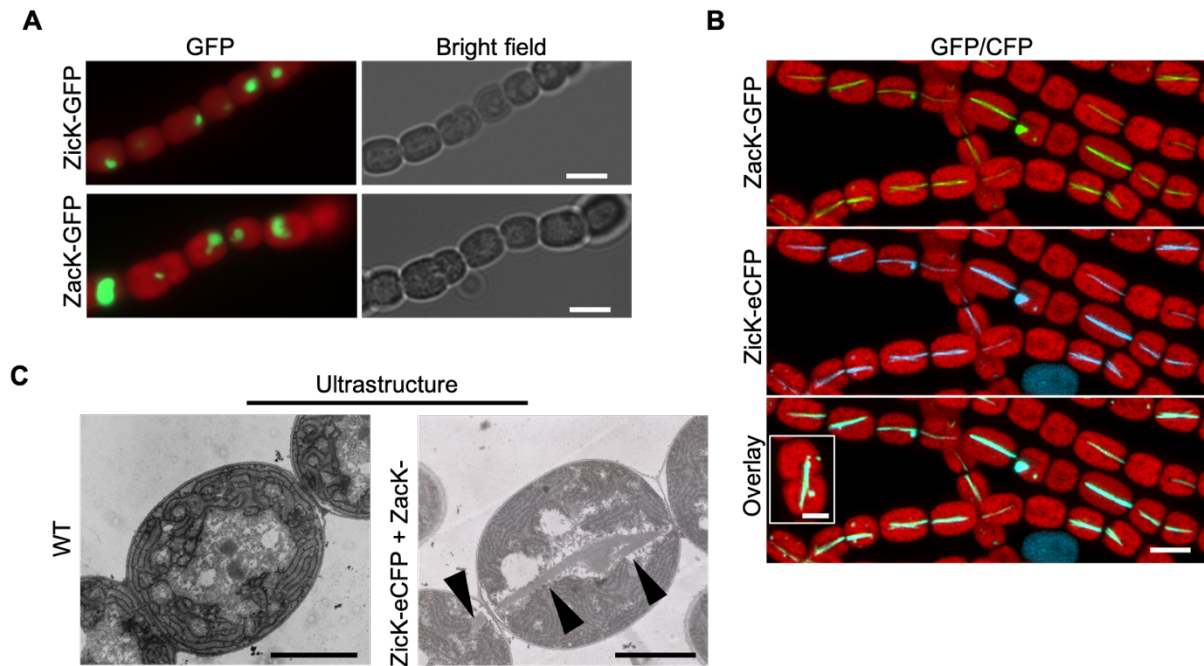

730

731 **Fig. 3: ZicK and ZacK form a heteropolymer *in vivo***

732 (A,B) Merged GFP or eCFP-fluorescence and chlorophyll autofluorescence (red) and bright field  
733 micrographs of *Anabaena* WT cells expressing (A) ZicK-GFP, ZacK-GFP or (B) co-expressing ZicK-  
734 eCFP and ZacK-GFP from  $P_{petE}$ . (B) Inlay shows that ZicK/ZacK filaments only cross not yet fully divided  
735 cells. Scale bars: (A,B) 5  $\mu\text{m}$ , (B inlay) 2.5  $\mu\text{m}$ . (C) Electron micrographs of ultrathin sections of  
736 *Anabaena* WT and *Anabaena* cells co-expressing ZicK-eCFP and ZacK-GFP. Black arrows indicate  
737 electron-dense structures coinciding with the ZicK/ZacK heteropolymer observed in Fig. 4B. Scale bars:  
738 1.6  $\mu\text{m}$ .

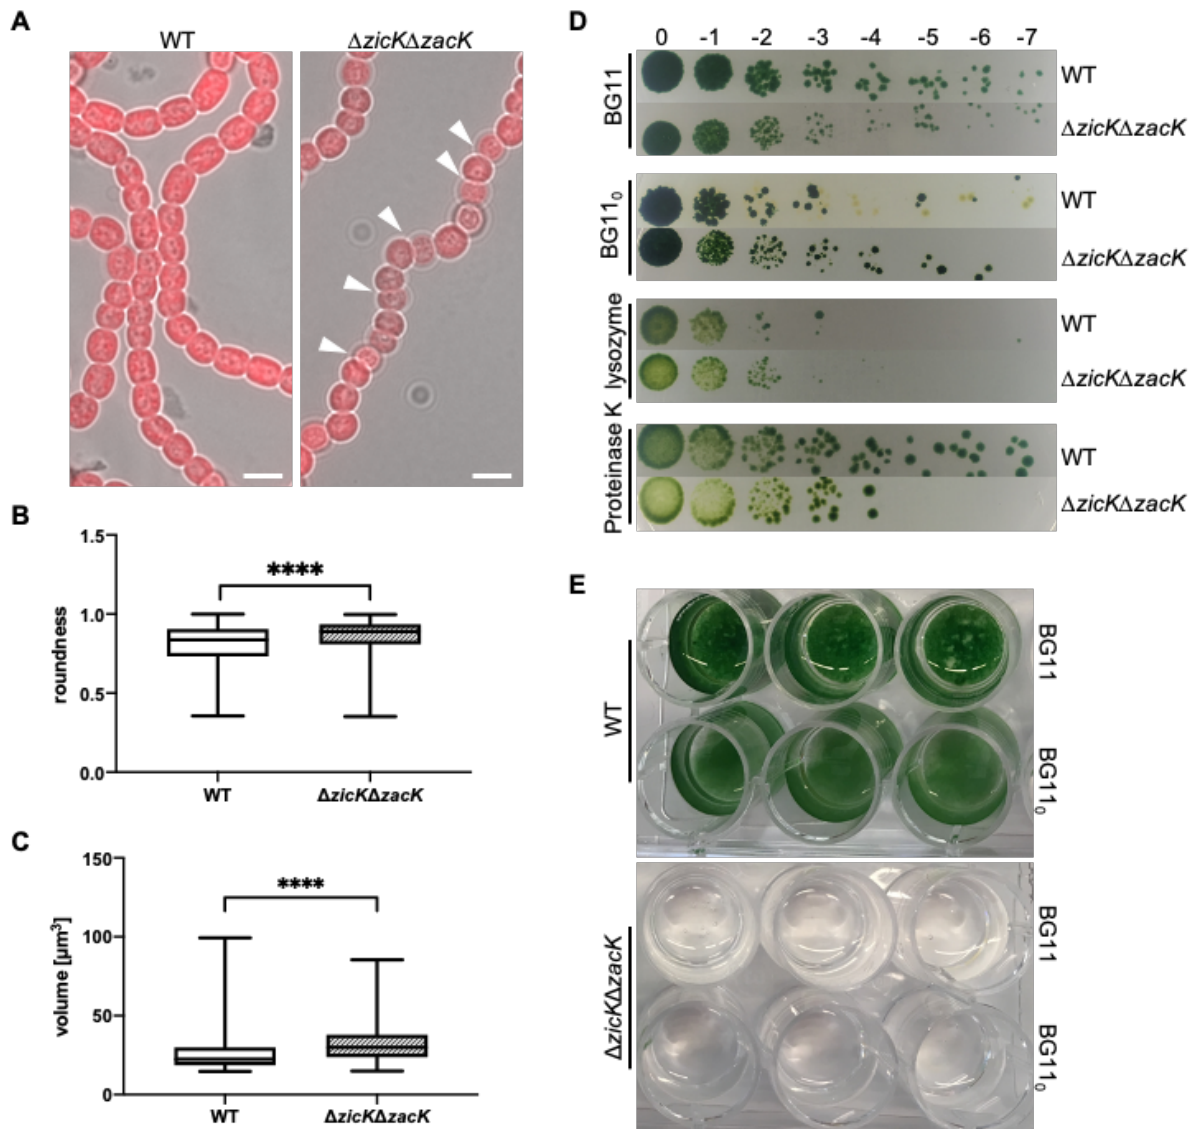

739

740 **Fig. 4: Deletion of *zicK* and *zacK* alters trichome and cell shape as well as trichome viability**

741 (A) Merged chlorophyll autofluorescence and bright field micrographs of *Anabaena* WT and  
 742  $\Delta zicK\Delta zacK$  mutant grown on BG11 plates. White triangles indicate zigzagged trichome growth.  
 743 Scale bars: 5  $\mu\text{m}$ . (B) Cell roundness and (C) volume of *Anabaena* WT and  $\Delta zicK\Delta zacK$  mutant  
 744 measured with Fiji imaging software. A perfect circle is defined as roundness of 1. Error bars indicate  
 745 standard deviations (*Anabaena* WT:  $n=537$ ;  $\Delta zicK\Delta zacK$ :  $n=404$ ). Values indicated with asterisks  
 746 are significantly different from the WT. \*\*\*\*:  $p < .0001$  (Student's t-test). (D) *Anabaena* WT and  
 747  $\Delta zicK\Delta zacK$  mutant were spotted onto BG11, BG11<sub>0</sub> or BG11 plates supplemented with lysozyme or  
 748 Proteinase K in triplicates of serial dilutions of factor 10 and grown until no further colonies arose  
 749 in the highest dilution ( $n=2$ ). (E) *Anabaena* WT and  $\Delta zicK\Delta zacK$  mutant were grown on BG11  
 750 plates, transferred to liquid BG11 and BG11<sub>0</sub> medium and incubated for 12 d at standard growth  
 751 conditions without shaking.



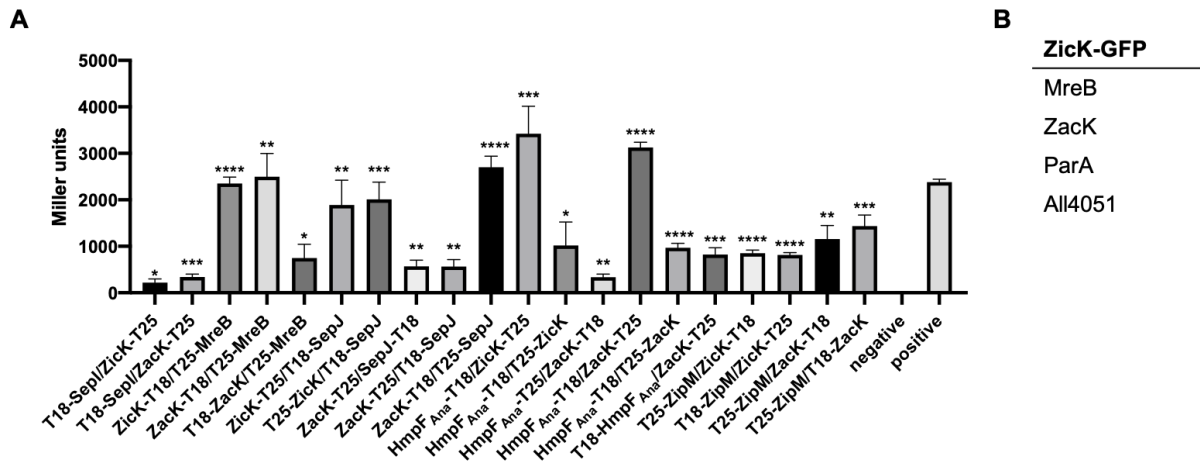

752

753 **Fig. 5: ZicK and ZacK interact with a multitude of *Anabaena* proteins involved in cell shape and**  
 754 **multicellularity**

755 (A) BACTH assays of *E. coli* cells co-expressing indicated T25 and T18 translational fusions of indicated  
 756 pair-wise combinations of ZicK, ZacK, SepJ, MreB, SepJ, HmpF<sub>Ana</sub> and ZipM. Only translational fusion  
 757 combinations that resulted in a significant interaction between two analysed proteins are shown. All  
 758 other combinations were negative for interaction. Note that we used full-length proteins for all our  
 759 BACTH analysis, including SepJ, whose precise subcellular localization remains to be identified  
 760 (Ramos-León *et al.*, 2017; Springstein *et al.*, 2020a) but could be different in *E. coli* and *Anabaena*  
 761 (Springstein *et al.*, 2020a). Quantitative values are given in Miller units, and the mean results from three  
 762 independent colonies are presented. Negative: N-terminal T25 fusion construct of the respective protein  
 763 co-transformed with empty pUT18C. Positive: Zip/Zip control. Error bars indicate standard deviations  
 764 (n = 3). Values indicated with asterisks are significantly different from the negative control. \*: p < .05,  
 765 \*\*: p < .005, \*\*\*: p < .0005, \*\*\*\*: p < .0001 (Student's t-test). (B) Excerpt of the identified specific  
 766 interactors of ZicK-GFP. The full list is listed in Supplementary File 3.



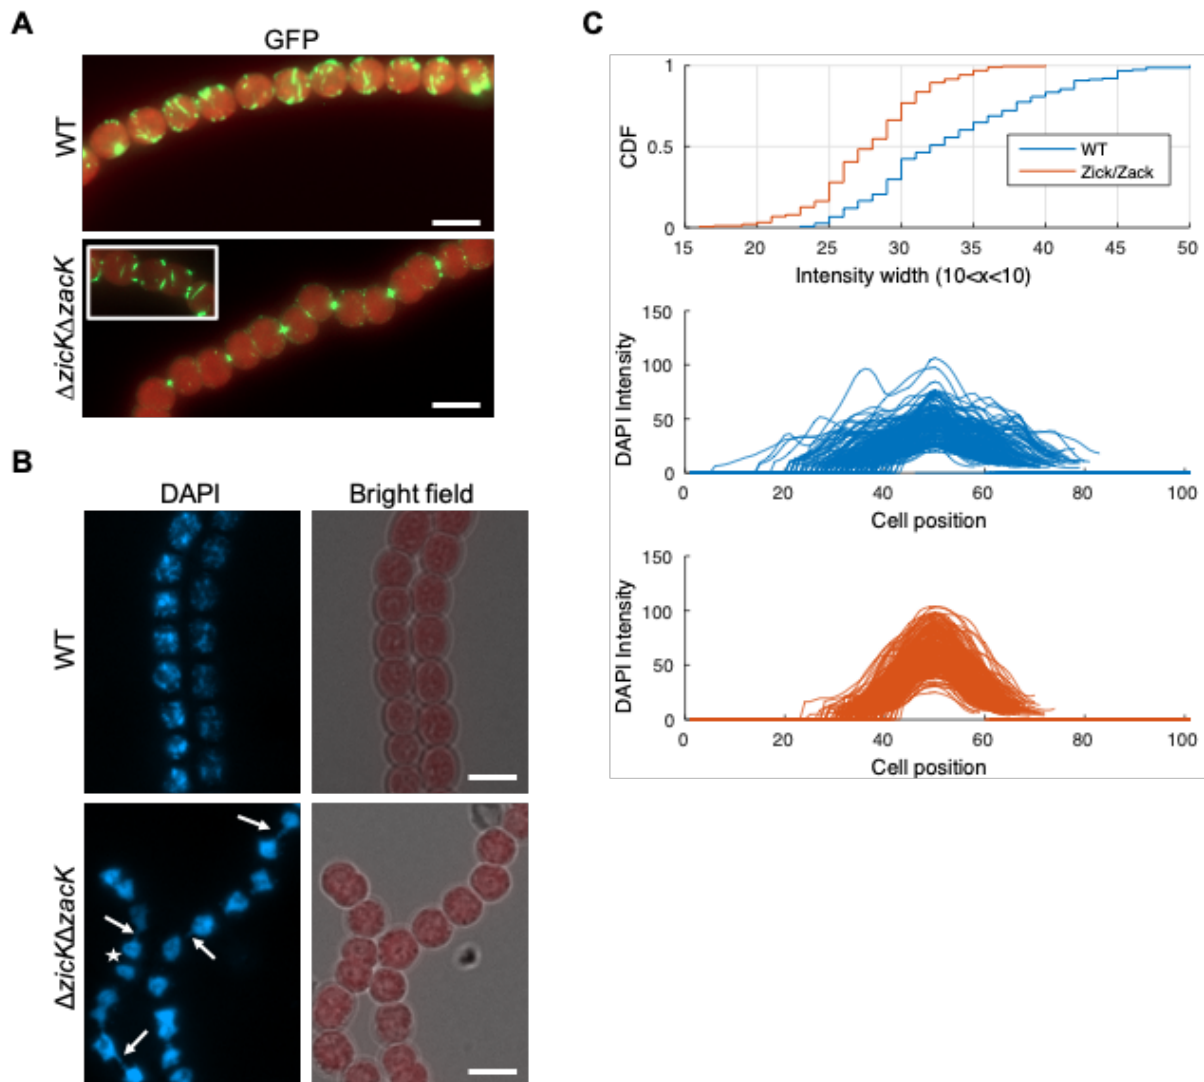

767

768 **Fig. 6: Effect of *zicK* and *zacK* deletion on MreB localization and DNA distribution**

769 (A) Merged GFP fluorescence and chlorophyll autofluorescence micrographs of *Anabaena* WT and  
 770  $\Delta zicK\Delta zacK$  mutant expressing GFP-MreB from  $P_{petE}$ . Cells were grown on BG11 plates. Scale bars: 5  
 771  $\mu\text{m}$ . (B) DAPI fluorescence and merged bright field and chlorophyll autofluorescence micrographs of  
 772 *Anabaena* WT and  $\Delta zicK\Delta zacK$  mutant on BG11 plates. White arrows indicate strings of DNA that  
 773 seemingly traverse from one cell to the other. Notably, no such strings are observed in dividing cells  
 774 (white star), suggesting that it is an effect that occurs after complete cell division. Although, we note that  
 775 high resolution microscopy would be needed to fully resolve this observation. Scale bars: 5  $\mu\text{m}$ . (C) Plot  
 776 profile showing a cumulative distribution function (CDF) of the DAPI signal intensities of pixels (grey  
 777 value) along *Anabaena* WT and  $\Delta zicK\Delta zacK$  mutant cells ( $n=151$  for each strain) in arbitrary units (a.u.)  
 778 and arranged to the respective peak maxima. The focal area size in the  $\Delta zicK\Delta zacK$  mutant was smaller  
 779 in comparison to the *Anabaena* WT ( $P=6.8 \times 10^{-117}$ , using Wilcoxon test). Notably, the comparison of cell  
 780 length among the strains reveals a similar result: the  $\Delta zicK\Delta zacK$  mutant cell size was smaller in  
 781 comparison to the *Anabaena* WT ( $P=7.2 \times 10^{-117}$ , using Wilcoxon test). Consequently, we compared the  
 782 area of the focal DAPI staining decided by the cell size among the strains. This, however, revealed that  
 783 this ratio is not significantly different between the  $\Delta zicK\Delta zacK$  mutant and the *Anabaena* WT.

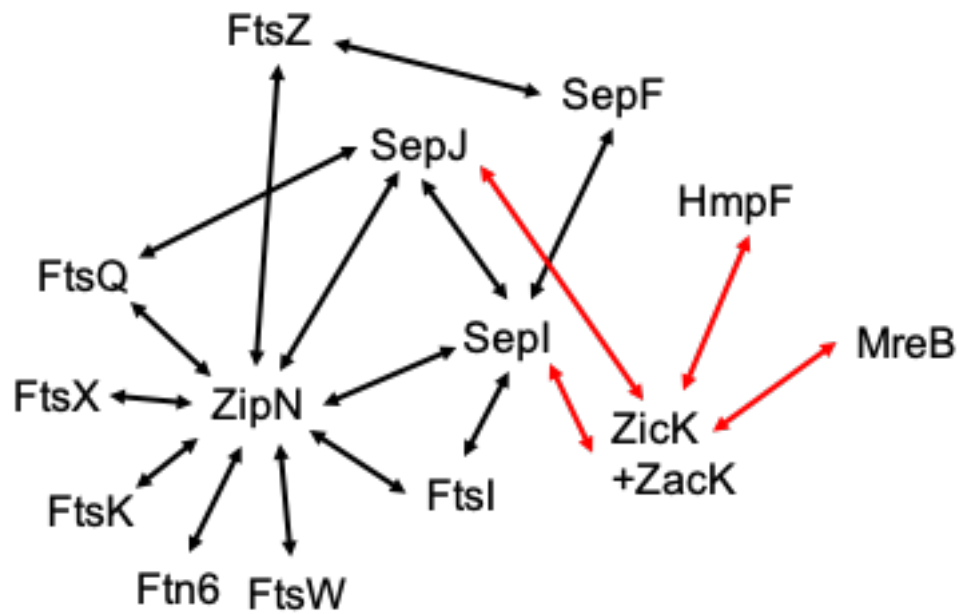

784

785 **Fig. 7: Interaction network of known divisome, elongasome and septal proteins in *Anabaena***

786 A model for a partial divisome, elongasome and septal junction network in *Anabaena* as deduced from  
787 BACTH and co-IP analyses. Black arrows indicate interactions that have been previously described by  
788 (Ramos-León *et al.*, 2015; Camargo *et al.*, 2019; Springstein *et al.*, 2020a). Red arrows indicate  
789 interactions identified in the current analysis.

790 **Supplementary Figures**

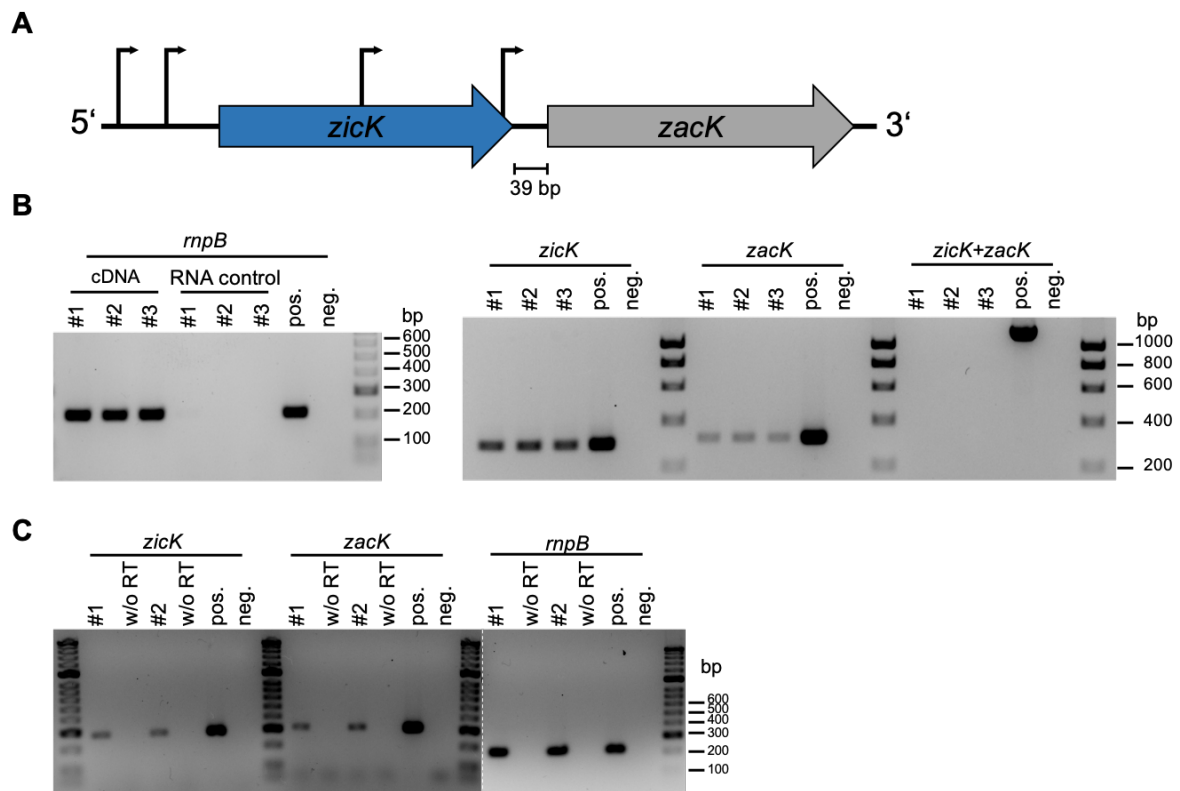

791

792 **Supplementary Fig. 1: *zicK* and *zack* are expressed at standard growth conditions**

793 **(A)** Depiction of the genomic environment of *zicK* (blue) and *ZacK* (grey) within the *Anabaena* genome  
 794 and their respective *in silico* predicted promoters depicted by black arrows (as predicted by BPROM  
 795 (Solovyev and Salamov, 2011)). Promoters of *zicK* are predicted to reside 204 bp and 543 bp upstream  
 796 of the open reading frame (ORF) and promoters of *zack* are located 22 bp and 450 bp upstream of the  
 797 ORF, thereby residing within the *zicK* ORF. **(B,C)** RT-PCR of whole cell RNA from *Anabaena* WT  
 798 cultures grown in **(B)** BG11 or **(C)** BG11<sub>o</sub> liquid medium from **(B)** three or **(C)** two independent biological  
 799 replicates. Gene transcripts were verified using internal gene primers (Supplementary Table 4). As  
 800 negative control (neg), PCR reactions were performed with water instead of cDNA or RNA and as a  
 801 positive control (pos) *Anabaena* gDNA was included. 100 ng cDNA was used for each RT-PCR reaction.  
 802 Absence of residual genomic DNA in DNase I-treated samples was verified with **(B)** 100 ng DNase I-  
 803 treated RNA (RNA control) or **(C)** 100 ng DNase I-treated RNA that was subjected to cDNA synthesis  
 804 reaction lacking reverse transcriptase (w/o RT).

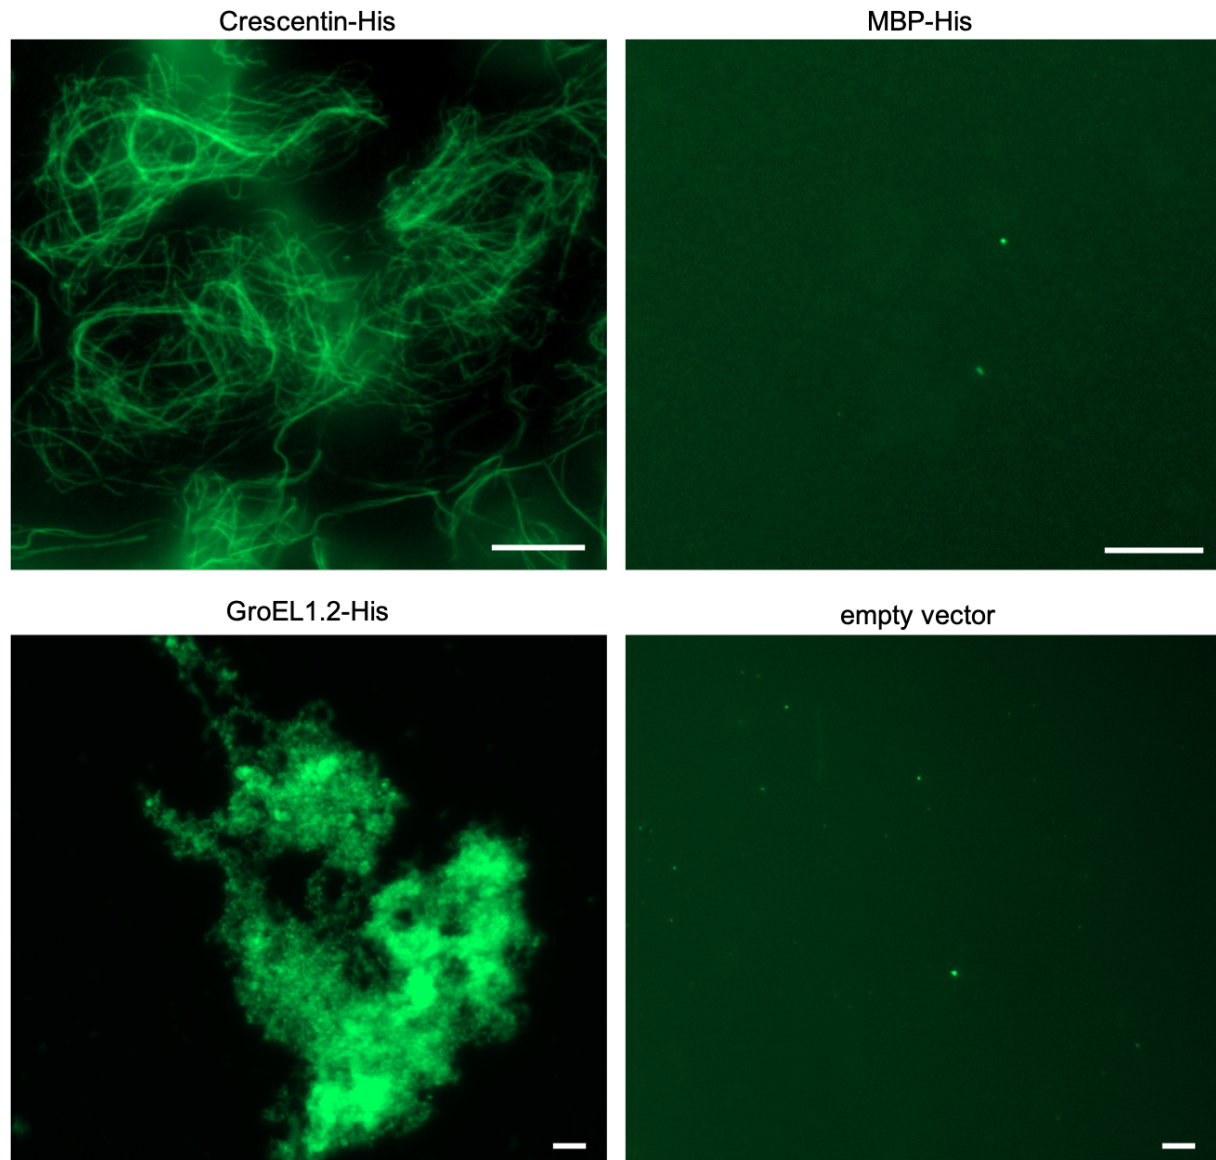

805

806 **Supplementary Fig. 2: *In vitro* polymerization assay controls**

807 NHS-fluorescein fluorescence micrographs of purified and renatured Crescentin-His, MBP-His and  
808 GroEL1.2 from *Chlorogloeopsis fritschii* PCC 6912 (0.5 mg ml<sup>-1</sup> each) as well as purified cell-free  
809 extracts of *E. coli* BL21 (DE3) carrying empty vector (pET21a(+)) in HLB. While neither the cell-free  
810 extract containing empty vector nor the MBP protein formed any discernible structures *in vitro*, GroEL1.2  
811 aggregates could be indicative for an uncontrolled oligomerization. We also observed similar clumps of  
812 protein aggregates from other *Anabaena* CCRPs that were negatively tested for *in vitro* polymerization.  
813 We therefore consider this *in vitro* behaviour a common property of putative oligomerizing proteins.  
814 Proteins and cell-free extracts (empty vector) were dialyzed in a stepwise urea-decreasing manner and  
815 stained with an excess of NHS-Fluorescein. Scale bars: 10 µm.

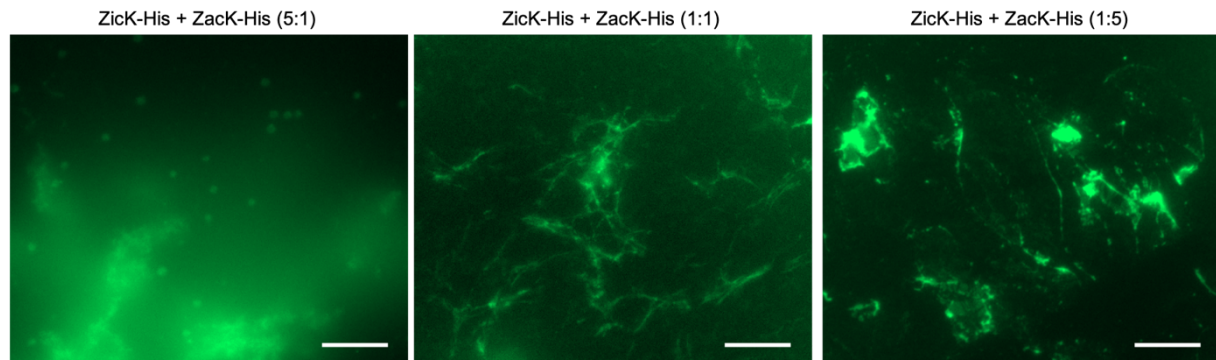

816

817 **Supplementary Fig. 3: Co-polymerization of ZicK and Zack is dosage-dependent**

818 NHS-fluorescein micrographs of purified and co-renatured ZicK-His and Zack-His in HLB renaturation  
819 buffer. ZicK-His and Zack-His were combined in different ratios, either with a fivefold excess of ZicK-  
820 His (left image; corresponding to  $0.25 \text{ mg ml}^{-1}$  ZicK-His and  $0.05 \text{ mg ml}^{-1}$  Zack-His), a fivefold excess  
821 of ZicK-His (right image; corresponding to  $0.25 \text{ mg ml}^{-1}$  Zack-His and  $0.05 \text{ mg ml}^{-1}$  ZicK-His) or an equal  
822 concentration of ZicK-His and Zack-His (central image;  $0.25 \text{ mg ml}^{-1}$  each). Proteins were dialyzed in a  
823 step-wise urea-decreasing manner and stained with an excess of NHS-Fluorescein. Fine  
824 heteropolymers only form when equal concentrations of ZicK-His and Zack-His are present. In concert  
825 with the partial self-polymerization capacity of Zack-His (Fig. 3A), certain filamentous structures are also  
826 detected in the Zack-His excess samples. However, most protein still precipitated under those  
827 conditions. Scale bars:  $10 \mu\text{m}$ .



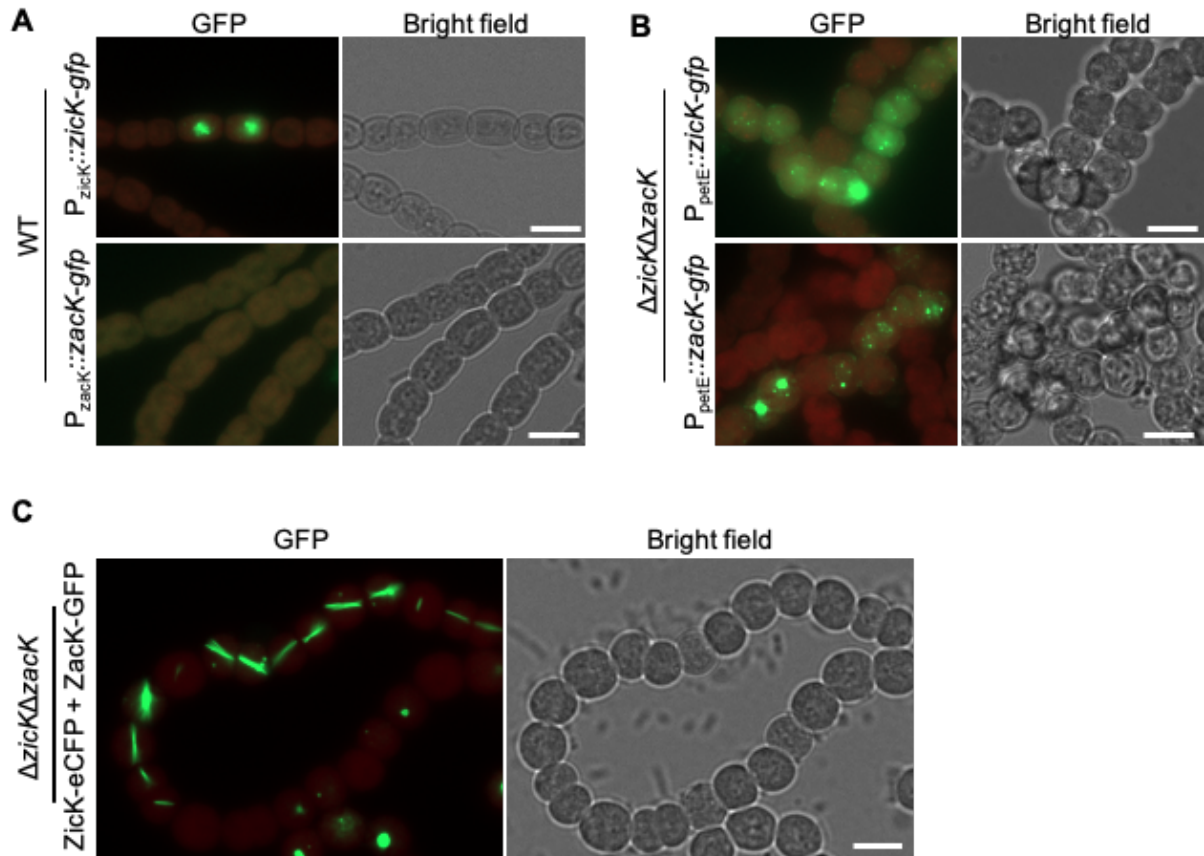

828

#### 829 **Supplementary Fig. 4: Heterologous expression of Zick and Zack**

830 (A) Merged GFP fluorescence and chlorophyll autofluorescence (red) and bright field micrographs of  
831 *Anabaena* WT cells expressing ZicK-GFP or Zack-GFP from P<sub>zicK</sub> and P<sub>zacK</sub>. No expression of Zack-  
832 GFP is detectable from P<sub>zacK</sub> while expression of ZicK-GFP from P<sub>zicK</sub> leads to similar patchy clumps  
833 within the cells as observed from P<sub>petE</sub> in Fig. 4A. Note, we generally observed that the P<sub>petE</sub>-driven gene  
834 expression does not always lead to expression of the fusion protein in every cell under standard growth  
835 conditions. (B,C) Merged GFP fluorescence and chlorophyll autofluorescence and bright field  
836 micrographs of  $\Delta zicK\Delta zacK$  mutant expressing (B) ZicK-GFP or Zack-GFP or (C) co-expressing ZicK-  
837 eCFP and Zack-GFP from P<sub>petE</sub>. For expression of ZicK-GFP alone, BG11 plates were supplemented  
838 with 1  $\mu$ M CuSO<sub>4</sub>. (A-C) These experiments show that expression of ZicK-GFP and Zack-GFP or co-  
839 expression of ZicK-eCFP together with Zack-GFP (Fig. 3A) from P<sub>petE</sub> and their localization in *Anabaena*  
840 WT is not affected by ZicK or Zack natively present in the WT background. Scale bars: (A-C) 5  $\mu$ m.

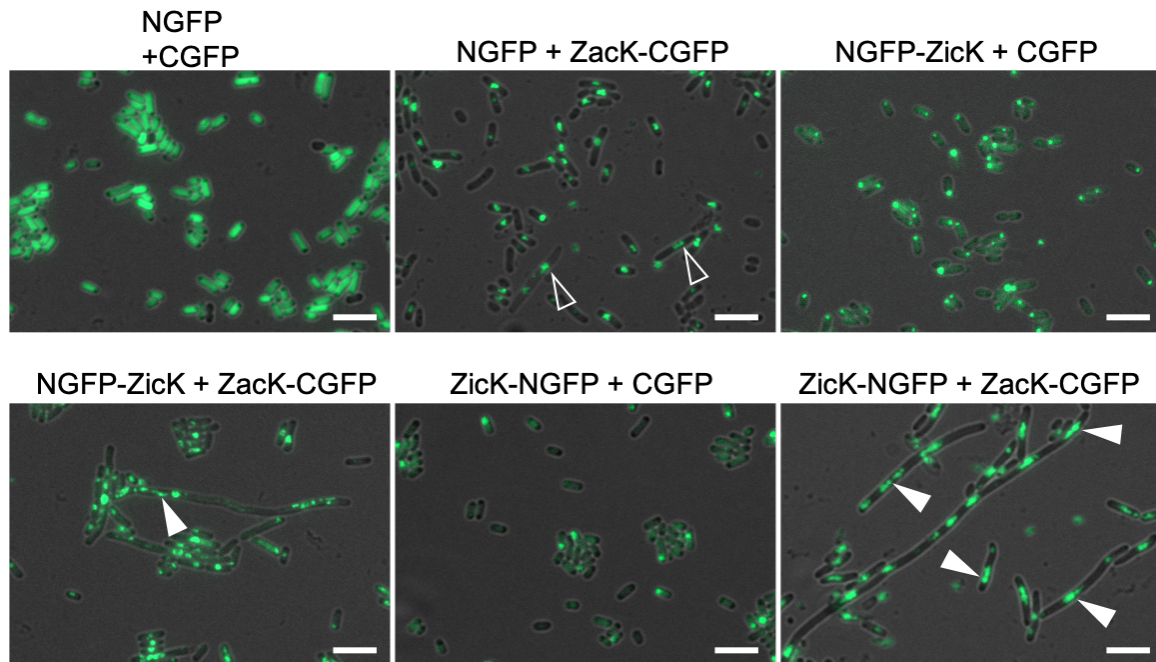

841

842 **Supplementary Fig. 5: Host-independent heteropolymerization of ZicK and ZacK upon**  
843 **heterologous expression in *E. coli***

844 GFP-fragment reassembly assay. Merged GFP fluorescence and bright field micrographs of *E. coli* cells  
845 co-expressing NGFP (empty pET11a-link-NGFP) and CGFP (empty pMRBAD-link-CGFP), NGFP and  
846 ZacK-CGFP, NGFP-ZicK and CGFP, NGFP-ZicK and ZacK-CGFP, ZicK-NGFP and CGFP or ZicK-  
847 NGFP and ZacK-CGFP. Transparent triangles point to structures resembling ZacK-His *in vitro* polymers.  
848 White triangles indicate FilP-GFP-like (Bagchi *et al.*, 2008) filament-like structures that resemble  
849 structures indicated with translucent triangles but span longer distances. Co-expression of both, ZicK  
850 and ZacK leads to an elongated cell phenotype. FilP-like structures and elongated cells can already be  
851 seen upon co-expression of NGFP-ZicK with ZacK-CGFP but only the co-expression of ZicK and ZacK  
852 with C-terminal GFP-fragments leads to a clear filamentous cell phenotype and abundant intracellular  
853 filament-like structures. This suggests that the N-terminus of ZicK and ZacK is important for  
854 heteropolymerization. Note: we observed that the GFP-fragment reassembly assay is not suitable for  
855 the detection of protein-protein interaction strengths as even empty vector controls reconstitute the GFP  
856 protein, nonetheless, we employed it as a mean to localize the effect of co-expression of ZicK and ZacK  
857 in an entirely unrelated organism. Scale bars: 5  $\mu$ m.



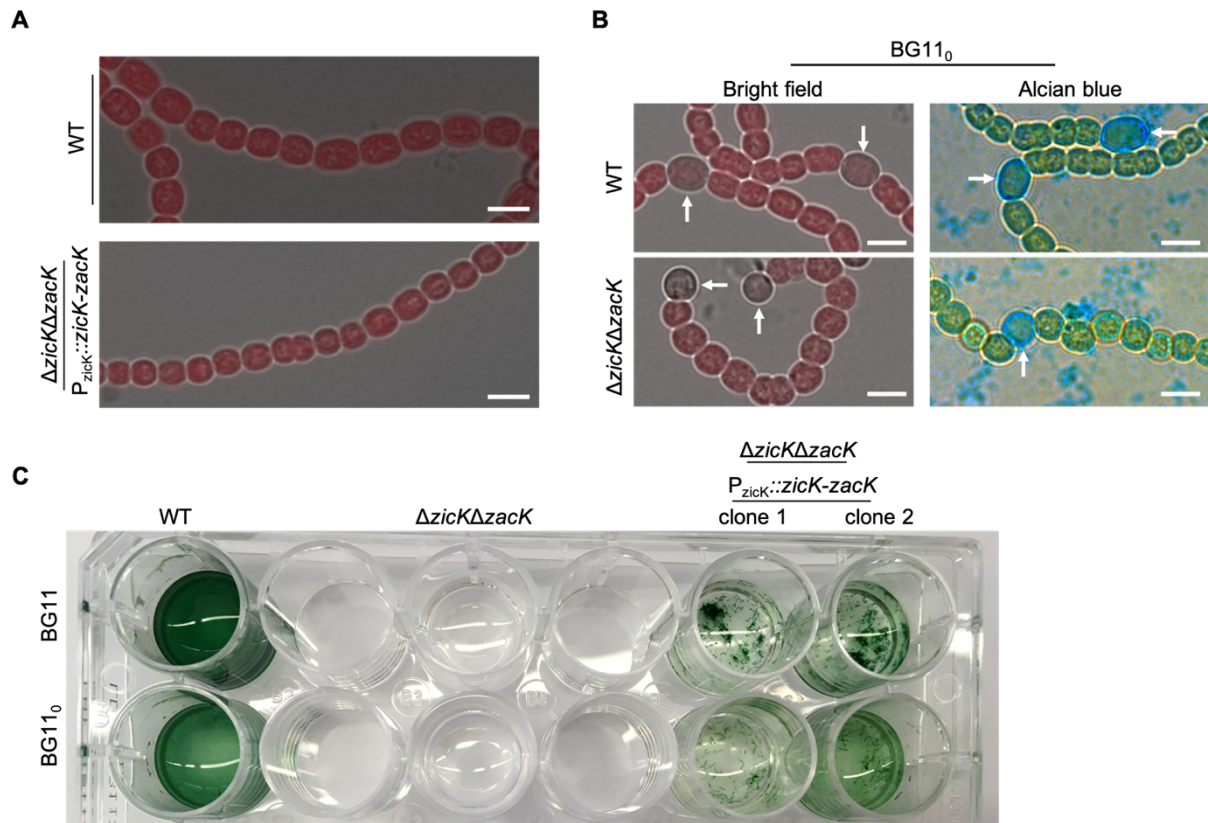

858

859 **Supplementary Fig. 6: Mutant phenotype complementation and identification of heterocysts**

860 (A) Morphological complementation of the  $\Delta zicK\Delta zacK$  mutant strain as a result of native expression of *zicK-zacK*  
861 from pRL25C. The capacity to complement the mutant phenotypes using the pRL25C plasmid shows that pDU1-  
862 based plasmids can be successfully employed to rescue WT phenotypes despite their variation in the relative copy  
863 number (Yang *et al.*, 2013). (B) Colour images of *Anabaena* WT and  $\Delta zicK\Delta zacK$  mutant strain grown on BG11<sub>0</sub>  
864 plates and stained with alcian blue. (A,B) Scale bars: 5  $\mu$ m. (C) Rescue of liquid growth of the  $\Delta zicK\Delta zacK$  mutant  
865 strains by expressing *zicK-zacK* from  $P_{zicK}$  from the replicative pRL25C plasmid.

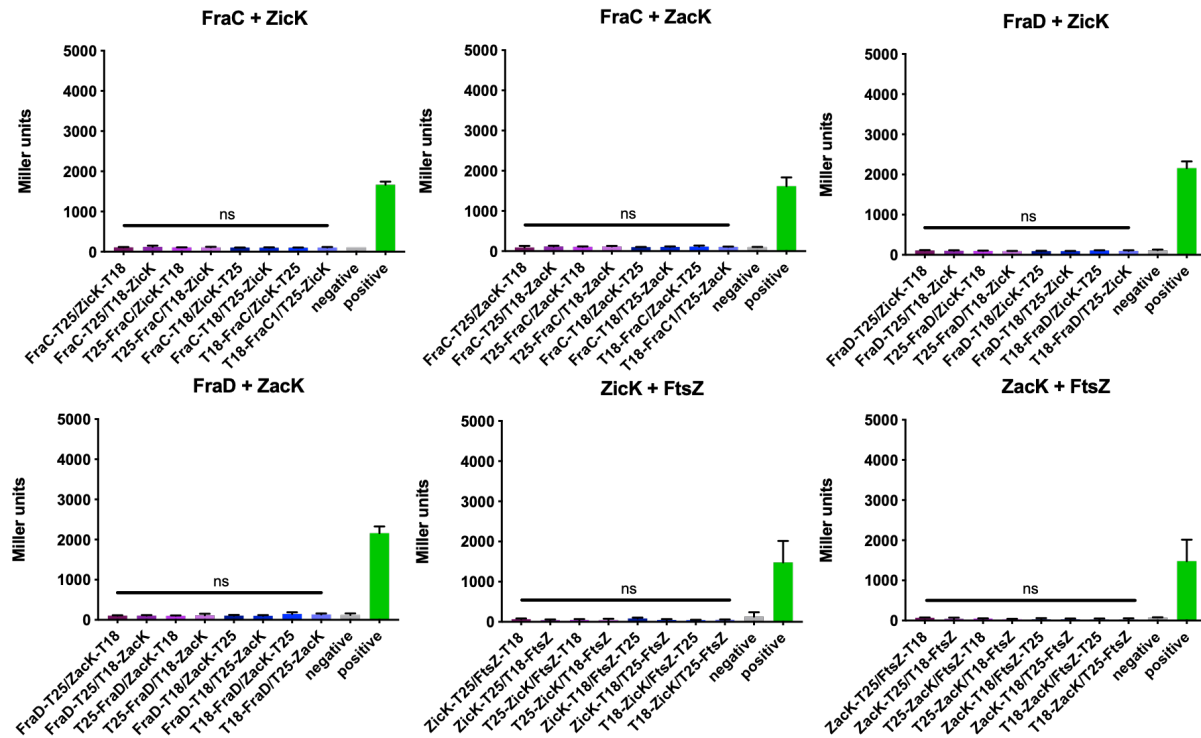

866

867 **Supplementary Fig. 7: ZicK and ZacK do not interact with other components of the septal**  
 868 **junctions besides SepJ**

869 Beta-galactosidase assays of *E. coli* cells co-expressing indicated T25 and T18 translational fusions of  
 870 all possible pair-wise combinations. Quantitative values are given in Miller units, and the mean results  
 871 from three independent colonies are presented. Negative: N-terminal T25 fusion construct of the  
 872 respective protein co-transformed with empty pUT18C. Positive: Zip/Zip control. Error bars indicate  
 873 standard deviations (n = 3). \*: P<0.05, \*\*: P<0.01, \*\*\*: P<0.001, \*\*\*\*: P<0.0001 (Dunnnett's multiple  
 874 comparison test and one-way ANOVA).

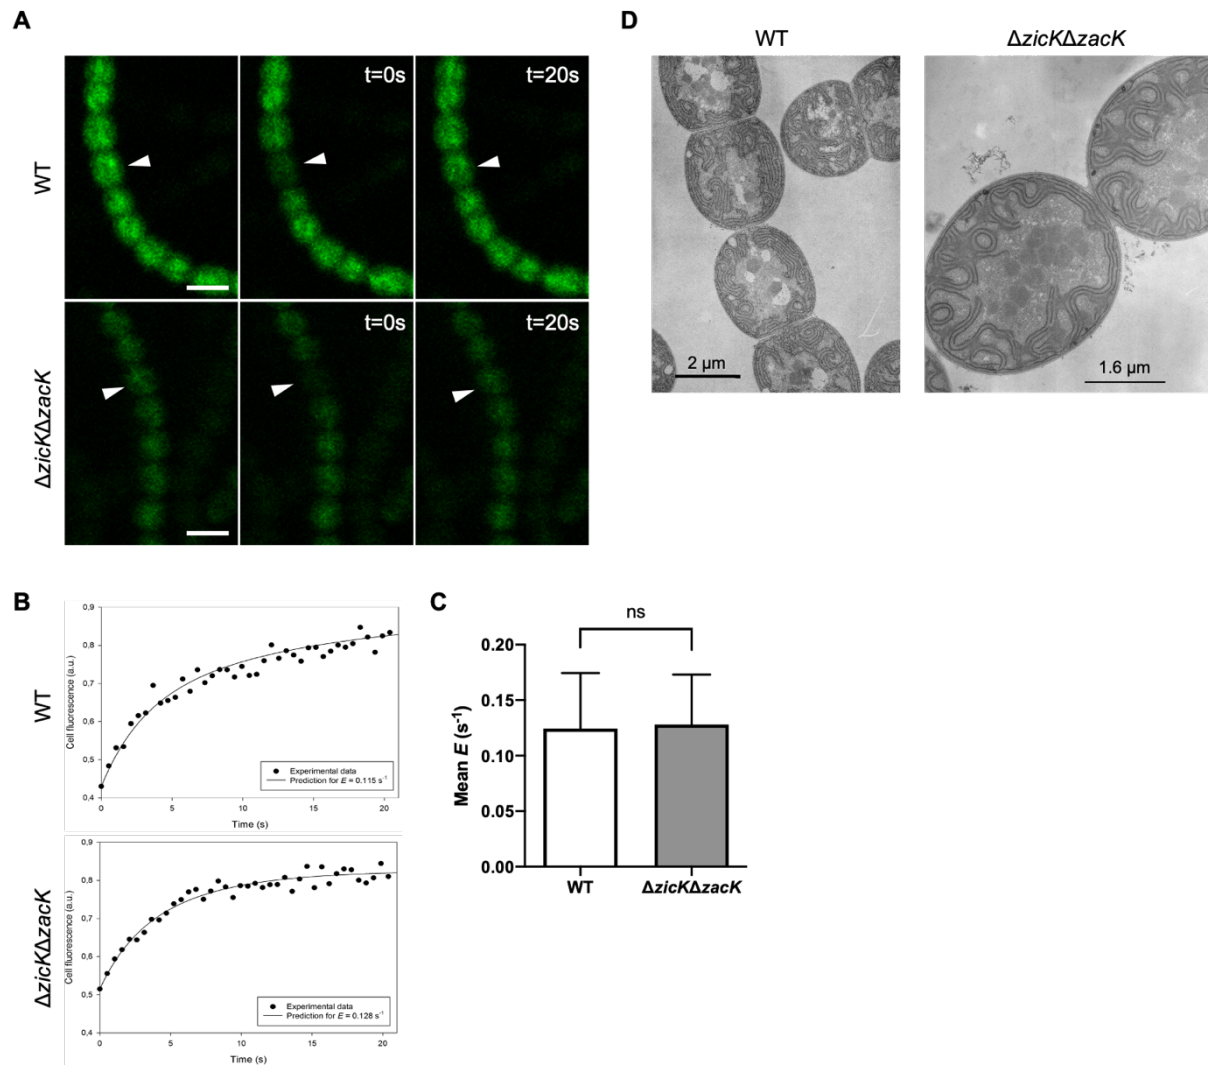

875

876 **Supplementary Fig. 8: The  $\Delta zicK\Delta zacK$  mutant is not defective in intercellular transport and**  
 877 **cellular ultrastructures**

878 **(A)** Representative calcein fluorescence micrographs of FRAP experiments from calcein-labelled  
 879 *Anabaena* WT and  $\Delta zicK\Delta zacK$  mutant grown on BG11 plates and **(B)** respective representative cell  
 880 fluorescence recovery graphs. White triangles indicate bleached cells. Fluorescence images show  
 881 respective cells prior bleaching, immediately after bleaching ( $t=0$ ) and 20 seconds after bleaching  
 882 ( $t=20s$ ). Scale bars: 5  $\mu m$ . **(C)** Mean exchange coefficients ( $E$ ) of FRAP experiments from **(A)**. Data  
 883 present the number of recordings of bleached cells (*Anabaena* WT:  $n=21$ ;  $\Delta zicK\Delta zacK$ :  $n=17$ ). Values  
 884 indicated with "ns" are not significantly different from the WT (using Student's t-test). **(D)** Ultrathin  
 885 sections of *Anabaena* WT and  $\Delta zicK\Delta zacK$  mutant strain grown on BG11 plates.

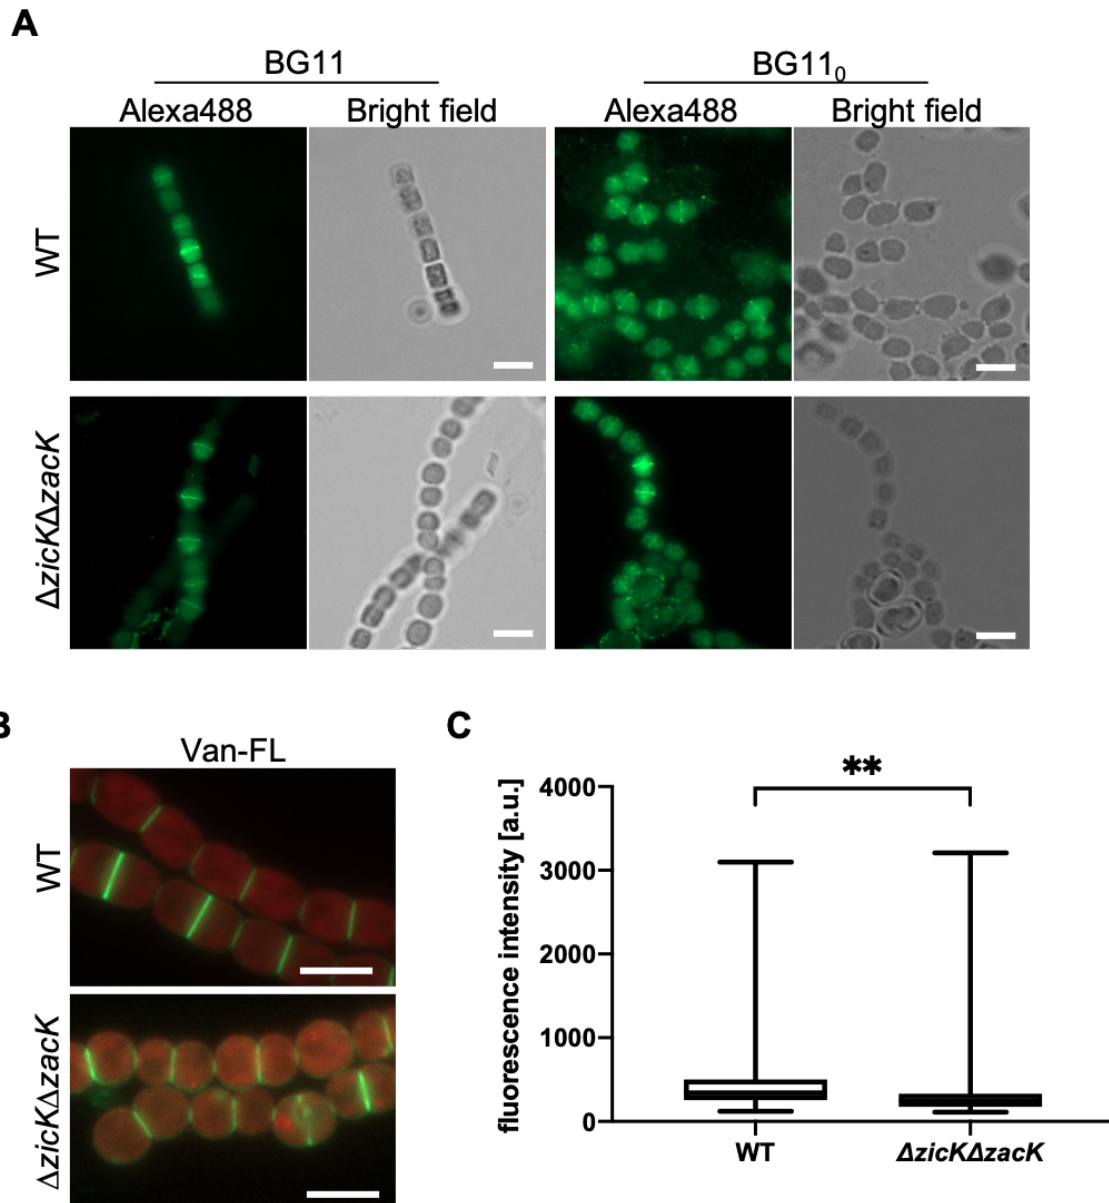

886

887 **Supplementary Fig. 9: PG biogenesis and Z-ring placement are largely unaffected in the**  
888 **ΔzicKΔzacK mutant**

889 (A) Alexa Fluor-488 and bright field micrographs of *Anabaena* WT and ΔzicKΔzacK mutant subjected to  
890 anti-FtsZ immunofluorescence. (B) Merged BODIPY™ FL Vancomycin (Van-FL) fluorescence and  
891 chlorophyll autofluorescence micrographs of *Anabaena* WT and the ΔzicKΔzacK mutant stained with  
892 Van-FL. As a result of the low Van-FL staining and for better visibility, Van-FL fluorescence signal in  
893 ΔzicKΔzacK mutant was artificially increased about twofold after image acquisition (note: this increase  
894 was not used for the fluorescence intensity measurement in (C)). Scale bars: (A,B) 5 μm. (C) Arithmetic  
895 mean fluorescence intensities of n=200 cell septa from (B). Values indicated with \* are significantly  
896 different from the WT. \*\*: P < .001, (Student's t-test).

### Supplementary Table 1: Cyanobacterial strains

| Strain                       | Genotype                                              | Resistance marker | Source                                            |
|------------------------------|-------------------------------------------------------|-------------------|---------------------------------------------------|
| <i>Anabaena</i> sp. PCC 7120 | WT                                                    |                   | Pasteur culture collection of Cyanobacteria (PCC) |
| BLS2                         | <i>Anabaena</i><br>( $\Delta zicK\Delta zack$ )::CS.3 | Sp, Sm            | This study                                        |

Sp = spectinomycin, Sm = streptomycin

### Supplementary Table 2: *E. coli* strains

| Strain            | Genotype                                                                                                                                                                                                                                         | Resistance | Source                             |
|-------------------|--------------------------------------------------------------------------------------------------------------------------------------------------------------------------------------------------------------------------------------------------|------------|------------------------------------|
| DH5 $\alpha$ .MCR | F <sup>-</sup> <i>endA1 supE44 thi-1</i> $\lambda$ <sup>-</sup><br><i>recA1 gyrA96 relA1 deoR</i> $\Delta$ ( <i>lacZYA-argF</i> )U169<br>$\Phi$ 80d <i>lacZ</i> $\Delta$ M15 <i>mcrA</i> $\Delta$ ( <i>mrr hsdRMS mcrBC</i> )                    |            | (Grant <i>et al.</i> , 1990)       |
| BL21 (DE3)        | F <sup>-</sup> <i>ompT gal dcm lon hsdS<sub>B</sub>(r<sub>B</sub><sup>-</sup> m<sub>B</sub><sup>-</sup>)</i> $\lambda$ (DE3 [ <i>lacI lacUV5-T7p07 ind1 sam7 nin5</i> ]) [ <i>malB</i> <sup>+</sup> ] <sub>K-12</sub> ( $\lambda$ <sup>S</sup> ) |            | (Studier and Moffatt, 1986)        |
| BTH101            | F <sup>-</sup> , <i>cya-99, araD139, galE15, galK16, rpsL1</i> ( <i>Str<sub>r</sub></i> ),<br><i>hsdR2, mcrA1, mcrB1</i>                                                                                                                         | Sm         | Euromedex                          |
| XL1-blue          | <i>endA1 gyrA96(nal<sup>R</sup>) thi-1 recA1 relA1 lac glnV44</i><br>F <sup>+</sup> [ <i>:Tn10 proAB<sup>+</sup> lacI<sup>q</sup> <math>\Delta</math>(lacZ)M15</i> ] <i>hsdR17</i> (r <sub>K</sub> <sup>-</sup> m <sub>K</sub> <sup>+</sup> )    | Tet        | Stratagene                         |
| HB101             | F <sup>-</sup> <i>mcrB mrr hsdS20</i> (r <sub>B</sub> <sup>-</sup> m <sub>B</sub> <sup>-</sup> ) <i>recA13 leuB6 ara-14</i><br><i>proA2 lacY1 galK2 xyl-5 mtl-1 rpsL20</i> (Sm <sup>R</sup> ) <i>glnV44</i> $\lambda$ <sup>-</sup>               | Sm         | (Boyer and Roulland-Dessoix, 1969) |

Tet = tetracycline

### Supplementary Table 3: Plasmids

| Name      | Description                                                                                                                                   | Resistance | Source                                                                                   |
|-----------|-----------------------------------------------------------------------------------------------------------------------------------------------|------------|------------------------------------------------------------------------------------------|
| pET21a(+) | Bacterial vector for expressing N- terminal T7 and/or C-terminal His6-tagged proteins in <i>E. coli</i>                                       | Amp        | Novagen                                                                                  |
| pIGA      | Cyanobacterial vector for insertion into neutral locus (RS1 and RS2) of <i>slr0168</i> in <i>Synechocystis</i>                                | Amp, Km    | A gift from Martin Hagemann (University Rostock, Germany); (Kunert <i>et al.</i> , 2000) |
| pRL25C    | Shuttle cosmid vector for cyanobacteria and <i>E. coli</i>                                                                                    | Km, Nm     | (Wolk <i>et al.</i> , 1988)                                                              |
| pRL623    | Methylation plasmid                                                                                                                           | Cm         | (Wolk <i>et al.</i> , 1988)                                                              |
| pRL443    | Conjugation plasmid                                                                                                                           | Amp        | (Wolk <i>et al.</i> , 1988)                                                              |
| pRL278    | Suicide vector used for homologous recombination in cyanobacteria; contains <i>sacB</i> for positive selection of double recombination events | Km, Nm     | (Wolk <i>et al.</i> , 1988)                                                              |



|                    |                                                                                                                                         |             |                                    |
|--------------------|-----------------------------------------------------------------------------------------------------------------------------------------|-------------|------------------------------------|
| pKNT25             | P <sub>lac</sub> ::-T25                                                                                                                 | Km          | Euromedex                          |
| pKT25              | P <sub>lac</sub> ::T25-                                                                                                                 | Km          | Euromedex                          |
| pUT18              | P <sub>lac</sub> ::-T18                                                                                                                 | Amp         | Euromedex                          |
| pUT18C             | P <sub>lac</sub> ::T18-                                                                                                                 | Amp         | Euromedex                          |
| pKT25- <i>zip</i>  | pKT25; P <sub>lac</sub> ::T25- <i>zip</i>                                                                                               | Km, Nm      | Euromedex                          |
| pUT18C- <i>zip</i> | pUT18C, P <sub>lac</sub> ::T18- <i>zip</i>                                                                                              | Amp         | Euromedex                          |
| pET11a-link-NGFP   | IPTG-inducible expression vector for translational fusion of target gene with a N-terminal <i>gfp</i> fragment in <i>E. coli</i>        | Amp         | (Wilson <i>et al.</i> , 2004)      |
| pMRBAD-link-CGFP   | L-arabinose-inducible expression vector for translational fusion of target gene with a C-terminal <i>gfp</i> fragment in <i>E. coli</i> | Km          | (Wilson <i>et al.</i> , 2004)      |
| pAM5084            | P <sub>trc</sub> :: <i>ecfp-kaiC</i>                                                                                                    | Amp         | (Cohen <i>et al.</i> , 2014)       |
| pCSEL24            | Integrates into the <i>nucA-nuiA</i> region of <i>Anabaena</i>                                                                          | Amp, Sm, Sp | (Olmedo-Verd <i>et al.</i> , 2006) |
| pTHS1              | pRL25C, P <sub>petE</sub> :: <i>zicK-gfp</i>                                                                                            | Km, Nm      | This study                         |
| pTHS4              | pKNT25, P <sub>lac</sub> :: <i>zipM-T25</i>                                                                                             | Km, Nm      | This study                         |
| pTHS5              | pKT25, P <sub>lac</sub> ::T25- <i>zipM</i>                                                                                              | Km, Nm      | This study                         |
| pTHS6              | pUT18, P <sub>lac</sub> :: <i>zipM-T18</i>                                                                                              | Amp         | This study                         |
| pTHS7              | pUT18C, P <sub>lac</sub> ::T18- <i>zipM</i>                                                                                             | Amp         | This study                         |
| pTHS8              | pKNT25, P <sub>lac</sub> :: <i>sepJ-T25</i>                                                                                             | Km, Nm      | This study                         |
| pTHS9              | pKT25, P <sub>lac</sub> ::T25- <i>sepJ</i>                                                                                              | Km, Nm      | This study                         |
| pTHS10             | pUT18, P <sub>lac</sub> :: <i>sepJ-T18</i>                                                                                              | Amp         | This study                         |
| pTHS11             | pUT18C, P <sub>lac</sub> ::T18- <i>sepJ</i>                                                                                             | Amp         | This study                         |
| pTHS12             | pKNT25, P <sub>lac</sub> :: <i>ftsZ-T25</i>                                                                                             | Km, Nm      | This study                         |
| pTHS13             | pKT25, P <sub>lac</sub> ::T25- <i>ftsZ</i>                                                                                              | Km, Nm      | This study                         |
| pTHS14             | pUT18, P <sub>lac</sub> :: <i>ftsZ-T18</i>                                                                                              | Amp         | This study                         |
| pTHS15             | pUT18C, P <sub>lac</sub> ::T18- <i>ftsZ</i>                                                                                             | Amp         | This study                         |
| pTHS16             | pKNT25, P <sub>lac</sub> :: <i>mreB-T25</i>                                                                                             | Km, Nm      | This study                         |
| pTHS17             | pKT25, P <sub>lac</sub> ::T25- <i>mreB</i>                                                                                              | Km, Nm      | This study                         |
| pTHS18             | pUT18, P <sub>lac</sub> :: <i>mreB-T18</i>                                                                                              | Amp         | This study                         |
| pTHS19             | pUT18C, P <sub>lac</sub> ::T18- <i>mreB</i>                                                                                             | Amp         | This study                         |
| pTHS20             | pKNT25, P <sub>lac</sub> :: <i>fraC-T25</i>                                                                                             | Km, Nm      | This study                         |
| pTHS21             | pKT25, P <sub>lac</sub> ::T25- <i>fraC</i>                                                                                              | Km, Nm      | This study                         |
| pTHS22             | pUT18, P <sub>lac</sub> :: <i>fraC-T18</i>                                                                                              | Amp         | This study                         |
| pTHS23             | pUT18C, P <sub>lac</sub> ::T18- <i>fraC</i>                                                                                             | Amp         | This study                         |
| pTHS24             | pKNT25, P <sub>lac</sub> :: <i>fraD-T25</i>                                                                                             | Km, Nm      | This study                         |
| pTHS25             | pKT25, P <sub>lac</sub> ::T25- <i>fraD</i>                                                                                              | Km, Nm      | This study                         |
| pTHS26             | pUT18, P <sub>lac</sub> :: <i>fraD-T18</i>                                                                                              | Amp         | This study                         |
| pTHS27             | pUT18C, P <sub>lac</sub> ::T18- <i>fraD</i>                                                                                             | Amp         | This study                         |
| pTHS28             | pKNT25, P <sub>lac</sub> :: <i>hmpF<sub>Ana</sub>-T25</i>                                                                               | Km, Nm      | This study                         |
| pTHS29             | pKT25, P <sub>lac</sub> ::T25- <i>hmpF<sub>Ana</sub></i>                                                                                | Km, Nm      | This study                         |
| pTHS30             | pUT18, P <sub>lac</sub> :: <i>hmpF<sub>Ana</sub>-T18</i>                                                                                | Amp         | This study                         |
| pTHS31             | pUT18C, P <sub>lac</sub> ::T18- <i>hmpF<sub>Ana</sub></i>                                                                               | Amp         | This study                         |

|         |                                                                                                                     |                |                                     |
|---------|---------------------------------------------------------------------------------------------------------------------|----------------|-------------------------------------|
| pTHS134 | pKNT25, P <sub>lac</sub> :: <i>sepl-T25</i>                                                                         | Km, Nm         | (Springstein <i>et al.</i> , 2020a) |
| pTHS135 | pKT25, P <sub>lac</sub> :: <i>T25-sepl</i>                                                                          | Km, Nm         | (Springstein <i>et al.</i> , 2020a) |
| pTHS136 | pUT18, P <sub>lac</sub> :: <i>sepl-T18</i>                                                                          | Amp            | (Springstein <i>et al.</i> , 2020a) |
| pTHS137 | pUT18C, P <sub>lac</sub> :: <i>T18-sepl</i>                                                                         | Amp            | (Springstein <i>et al.</i> , 2020a) |
| pTHS151 | pRL25C, P <sub>petE</sub> :: <i>zack-gfp</i>                                                                        | Km, Nm         | This study                          |
| pTHS152 | pRL25C, P <sub>petE</sub> :: <i>zick-ecfp</i>                                                                       | Km, Nm         | This study                          |
| pTHS153 | pRL25C, P <sub>petE</sub> :: <i>zick-ecfp<sup>b)</sup></i> ,<br>P <sub>petE</sub> :: <i>zack-gfp</i>                | Km, Nm         | This study                          |
| pTHS154 | pET21a(+), P <sub>T7</sub> :: <i>zick-his</i>                                                                       | Amp            | This study                          |
| pTHS155 | pET21a(+), P <sub>T7</sub> :: <i>zack-his</i>                                                                       | Amp            | This study                          |
| pTHS156 | pET11a-link-NGFP, P <sub>T7</sub> :: <i>ngfp-zick</i>                                                               | Amp            | This study                          |
| pTHS157 | pET11a-link-NGFP, P <sub>T7</sub> :: <i>zick-ngfp</i>                                                               | Amp            | This study                          |
| pTHS158 | pMRBAD-link-CGFP, P <sub>ara</sub> :: <i>zack-cgfp</i>                                                              | Km             | This study                          |
| pTHS159 | pKNT25, P <sub>lac</sub> :: <i>zick-T25</i>                                                                         | Km, Nm         | This study                          |
| pTHS159 | pKT25, P <sub>lac</sub> :: <i>T25-zick</i>                                                                          | Km, Nm         | This study                          |
| pTHS160 | pUT18, P <sub>lac</sub> :: <i>zick-T18</i>                                                                          | Amp            | This study                          |
| pTHS161 | pUT18C, P <sub>lac</sub> :: <i>T18-zick</i>                                                                         | Amp            | This study                          |
| pTHS162 | pKNT25, P <sub>lac</sub> :: <i>zack-T25</i>                                                                         | Km, Nm         | This study                          |
| pTHS163 | pKT25, P <sub>lac</sub> :: <i>T25-zack</i>                                                                          | Km, Nm         | This study                          |
| pTHS164 | pUT18, P <sub>lac</sub> :: <i>zack-T18</i>                                                                          | Amp            | This study                          |
| pTHS165 | pUT18C, P <sub>lac</sub> :: <i>T18-zack</i>                                                                         | Amp            | This study                          |
| pTHS166 | pRL278, containing 1500 bp upstream of <i>zick</i> and 1500 bp downstream of <i>zack</i> flanking the CS.3 cassette | Nm, Km, Sm, Sp | This study                          |
| pTHS167 | pRL25C, P <sub>zick</sub> :: <i>zick-gfp</i>                                                                        | Nm, Km,        | This study                          |
| pTHS168 | pRL25C, P <sub>zack</sub> :: <i>zack-gfp</i>                                                                        | Nm, Km,        | This study                          |
| pTHS169 | pRL25C, P <sub>zick</sub> :: <i>zick-zack</i>                                                                       | Nm, Km,        | This study                          |
| pTHS170 | pIGA, P <sub>cpc560</sub> :: <i>zick-gfp</i>                                                                        | Amp; Km        | This study                          |
| pTHS171 | pIGA, P <sub>cpc560</sub> :: <i>zack-gfp</i>                                                                        | Amp; Km        | This study                          |
| pTHS172 | pIGA, P <sub>cpc560</sub> :: <i>zick-ecfp</i> ; P <sub>cpc560</sub> :: <i>zack-gfp</i>                              | Amp; Km        | This study                          |

Km = kanamycin, Nm = neomycin, Amp = ampicillin; Cm = chloramphenicol

- eCFP from (Cohen *et al.*, 2014) was adjusted for C-terminal translational fusion instead of N-terminal fusion. For this, a N-terminal Myc sequences followed by a seven amino acid linker (GSGSGSG) and an additional stop codon at the C-terminus were added.



**Supplementary Table 4: Oligonucleotides**

| #  | Given name           | Sequence (5' -> 3')                                          | Purpose                                                                      |
|----|----------------------|--------------------------------------------------------------|------------------------------------------------------------------------------|
| 1  | rnpB_intern_A        | TGCTGGATAACGTCCAGTGC                                         | RT-PCR for <i>rnpB</i>                                                       |
| 2  | rnpB_intern_B        | GGTTTACCGAGCCAGTACCTC                                        | RT-PCR for <i>rnpB</i>                                                       |
| 3  | Nos903_intern_A      | TCAGCTAGACGTAAAGAGTGCC                                       | RT-PCR for <i>zicK</i>                                                       |
| 4  | Nos903_intern_B      | TAATTCTGCTGGGAATGCAGC                                        | RT-PCR for <i>zicK</i>                                                       |
| 5  | Nos904_intern_A      | TGGAATTAGCGAAGGGGTGG                                         | RT-PCR for <i>zack</i>                                                       |
| 6  | Nos904_intern_B      | TGTTTCATAGCCATCTGTTGCCA                                      | RT-PCR for <i>zack</i>                                                       |
| 7  | petE_903_Fwd         | GAGATTATCAAAAAGGATCCCAGTACTCAGA<br>ATTTTTTGCTGAGGTA          | Amplification of P <sub>petE</sub> for pTHS1                                 |
| 8  | petE_903_Rev         | TTGAGTGCAACTGTCGTCATGGCGTTCTCCT<br>AACCTGTAGTTTTATTTTT       | Amplification of P <sub>petE</sub> for pTHS1                                 |
| 9  | pRL25-<br>Nos903_Fwd | CTACAGGTTAGGAGAACGCCATGACGACAG<br>TTGCACTCAAAGATAG           | Amplification of <i>zicK</i> for pTHS1                                       |
| 10 | pRL25-<br>Nos903_Rev | GCACTAGCAGATGCACTAGCTTTAGCCGTA<br>GAACTATCAAAAAGCTCTCATTGC   | Amplification of <i>zicK</i> for pTHS1                                       |
| 11 | GFP_903_Fwd          | TTGATAGTTCTACGGCTAAAGCTAGTGCATC<br>TGCTAGTGCTAGT             | Amplification of <i>gfp</i> for pTHS1                                        |
| 12 | GFP_903_Rev          | CTTTCGTCTTCAAGAATTCTTTATTTGTATAG<br>TTCATCCATGCCATGTGTAATCC  | Amplification of <i>gfp</i> for pTHS1                                        |
| 13 | pRL25c-903_V_F       | TGGATGAACTATACAAATAAAGAATTCTTGA<br>AGACGAAAGGGCC             | Amplification of pRL25C for pTHS1                                            |
| 14 | pRL25c-903_V_R       | GCAAAAATTCTGAGTACTGGGATCCTTTTT<br>GATAATCTCATGACCAAAATCC     | Amplification of pRL25C for pTHS1                                            |
| 15 | Nos904_2A            | CTACAGGTTAGGAGAACGCCATGGCAGTCA<br>AAAAGTTAACAGACAAAAAC       | Amplification of <i>zack</i> for pTHS151                                     |
| 16 | Nos904_2B            | GCACTAGCAGATGCACTAGCTTTATTTTTCA<br>CTTGACTTTTTGCCTGTTCTAAAGC | Amplification of <i>zack</i> for pTHS151                                     |
| 17 | pRL25c_NE_B_Fwd      | GCTAGTGCATCTGCTAGTGCTAGTG                                    | Amplification of pTHS1 to replace <i>zicK</i> with <i>zack</i> (for pTHS151) |
| 18 | pRL25c_NE_B_Rev      | GGCGTTCTCCTAACCTGTAGTTTTATTTTTCT                             | Amplification of pTHS1 to replace <i>zicK</i> with <i>zack</i> (for pTHS151) |
| 19 | pRL25c_ClaI_B        | ATAAGCTTTAATGCGGTAGTTTATCACAG                                | Amplification of pRL25C for pTHS152                                          |
| 20 | pRL25c_ClaI_A        | ATGATAAGCTGTCAAACATGAGAATTCTTG                               | Amplification of pRL25C for pTHS152                                          |
| 21 | petE_2A              | ACTACCGCATTAAAGCTTATCAGTACTCAGA<br>ATTTTTTGCTGAGGTA          | Amplification of P <sub>petE::zicK</sub> for pTHS152                         |
| 22 | Nos903_2B            | ttcgctgataaGCTTCTGTTCTTTAGCCGTAGAAC<br>TATCAAAAAGCTCTC       | Amplification of P <sub>petE::zicK</sub> for pTHS152                         |
| 23 | Linker_eCFP_3A       | GGCTCTGGATCGGGTTCAGGAATGGTGAGC<br>AAGGGCGAG                  | First round of amplification of <i>ecfp</i> for pTHS152                      |
| 24 | eCFP_3B              | CTGCTGCTTACTTGTACAGCTCGTCCATGCC                              | First round of amplification of <i>ecfp</i> for pTHS152 and pTHS172          |
| 25 | MYC_Linkers_3A2      | GAACAGAAGCTTATCAGCGAAGAAGATCTG<br>GGCTCTGGATCGGGTTCAG        | Second round of amplification of                                             |

|    |                   |                                                              |                                                                   |
|----|-------------------|--------------------------------------------------------------|-------------------------------------------------------------------|
|    |                   |                                                              | <i>ecfp</i> for pTHS152 and pTHS172                               |
| 26 | eCFP_3B2          | TCATGTTTGACAGCTTATCATTACTTGACAGCTCGTCCATGCC                  | Second round of amplification of <i>ecfp</i> for pTHS152          |
| 27 | petE_BamHI_2A     | TTGGTCATGAGATTATCAAAAAGCAGTACTCAGAATTTTTTGTGAGG              | Amplification of P <sub>petE</sub> :: <i>zacK-gfp</i> for pTHS153 |
| 28 | GFP_BamHI_2B      | ATTGATTTAAACTTCATTTTTAATTTAAAAGTTATTTGTATAGTTCATCCATGCCATGTG | Amplification of P <sub>petE</sub> :: <i>zacK-gfp</i> for pTHS153 |
| 29 | Nos903_NdeI_F     | GCTACATATGACGACAGTTGCACTCA                                   | Amplification of <i>zicK</i> for pTHS154                          |
| 30 | Nos903_XhoI_R_w/o | GCTACTCGAGTTTAGCCGTAGAACTATCAAAAGC                           | Amplification of <i>zicK</i> for pTHS154                          |
| 31 | Nos904_NdeI_F     | GCTACATATGGCAGTCAAAAAGTTAACAGAC                              | Amplification of <i>zacK</i> for pTHS155                          |
| 32 | Nos904_XhoI_wo_R  | GCTACTCGAGTTTATTTTTCACTTGACTTTTTGCCT                         | Amplification of <i>zacK</i> for pTHS155                          |
| 33 | 903_split_A       | AAGGTGGCTCTGGCTCTGGCTCGAGCATGACGACAGTTGCACTCAAAG             | Amplification of <i>zicK</i> for pTHS156                          |
| 34 | 903_split_B       | CGGGCTTTGTTAGCAGCCGTTATTTAGCCGTAGAACTATCAAAAAGCTCTC          | Amplification of <i>zicK</i> for pTHS156                          |
| 35 | 903_split_A2      | TTAACTTTAAGAAGGAGATATACATATGACGACAGTTGCACTCAAAG              | Amplification of <i>zicK</i> for pTHS157                          |
| 36 | 903_split_B2      | CCATGGTGATGGTGGTGTGAGATGCACTAGCTTTAGCCGTAGAACTATCAAAAAGCTCTC | Amplification of <i>zicK</i> for pTHS157                          |
| 37 | 904_split_A       | TTAACTTTAAGAAGGAGATATACCATGGCAGTCAAAAAGTTAACAGACA            | Amplification of <i>zacK</i> for pTHS158                          |
| 38 | 904_split_B       | TTACCGCTTCCACCCGACGTTTTATTTTTCACTTGACTTTTTGCCTGTTC           | Amplification of <i>zacK</i> for pTHS158                          |
| 39 | N-term_1A         | GAGGATCCCCGGGTACC                                            | PCR amplification of pKNT25 and pUT18                             |
| 40 | N-term_1B         | TAGAGTCGACCTGCAGGCA                                          | PCR amplification of pKNT25 and pUT18                             |
| 41 | pKT25_1A          | CCCCGGGTACCTAAGTAAGTAAG                                      | PCR amplification of pKT25                                        |
| 42 | pKT25_1B          | ATCCTCTAGAGTCGACCCTGC                                        | PCR amplification of pKT25                                        |
| 43 | pUT18C_1A         | CCGAGCTCGAATTCATCGAT                                         | PCR amplification of pUT18C                                       |
| 44 | pUT18C_1B         | TACCCGGGGATCCTCTAGAGT                                        | PCR amplification of pUT18C                                       |
| 45 | MB_17A            | TGCCTGCAGGTCGACTCTAATGACGACAGTTGCACTCAAAG                    | Cloning of <i>zicK</i> into pKNT25 or pUT18                       |
| 46 | MB_17B            | TCGGTACCCGGGGATCCTCTTTAGCCGTAGAACTATCAAAAAGCTCTC             | Cloning of <i>zicK</i> into pKNT25 or pUT18                       |
| 47 | MB_18A            | AGGGTCGACTCTAGAGGATATGACGACAGTTGCACTCAAAG                    | Cloning of <i>zicK</i> into pKT25                                 |
| 48 | MB_18B            | CTTACTTAGGTACCCGGGGTTTAGCCGTAGAACTATCAAAAAGCTCTC             | Cloning of <i>zicK</i> into pKT25                                 |
| 49 | MB_20A            | TCTAGAGGATCCCCGGGTAATGACGACAGTTGCACTCAAAG                    | Cloning of <i>zicK</i> into pUT18C                                |
| 50 | MB_20B            | TCGATGAATTCGAGCTCGGTTTAGCCGTAGAACTATCAAAAAGCTCTC             | Cloning of <i>zicK</i> into pUT18C                                |

|    |        |                                                        |                                                   |
|----|--------|--------------------------------------------------------|---------------------------------------------------|
| 51 | MB_21A | TGCCTGCAGGTCGACTCTAATGGCAGTCAA<br>AAAGTTAACAGACAA      | Cloning of <i>zack</i><br>into pKNT25 or<br>pUT18 |
| 52 | MB_21B | TCGGTACCCGGGGATCCTCTTTATTTTTCAC<br>TTGACTTTTTGCCTGTTC  | Cloning of <i>zack</i><br>into pKNT25 or<br>pUT18 |
| 53 | MB_22A | AGGGTCGACTCTAGAGGATATGGCAGTCAA<br>AAAGTTAACAGACAA      | Cloning of <i>zack</i><br>into pKT25              |
| 54 | MB_22B | CTTACTTAGGTACCCGGGGTTTATTTTTCAC<br>TTGACTTTTTGCCTGTTC  | Cloning of <i>zack</i><br>into pKT25              |
| 55 | MB_24A | TCTAGAGGATCCCCGGGTAATGGCAGTCAA<br>AAAGTTAACAGACAA      | Cloning of <i>zack</i><br>into pUT18C             |
| 56 | MB_24B | TCGATGAATTCGAGCTCGGTTTATTTTTCAC<br>TTGACTTTTTGCCTGTTC  | Cloning of <i>zack</i><br>into pUT18C             |
| 57 | MB_25A | TGCCTGCAGGTCGACTCTAATGCAACAAGT<br>CATAGTAAGTAATCGAT    | Cloning of <i>zipM</i><br>into pKNT25 or<br>pUT18 |
| 58 | MB_25B | TCGGTACCCGGGGATCCTCGGATGCGTATC<br>TAGCTATTAGATGTTC     | Cloning of <i>zipM</i><br>into pKNT25 or<br>pUT18 |
| 59 | MB_26A | AGGGTCGACTCTAGAGGATATGCAACAAGT<br>CATAGTAAGTAATCGAT    | Cloning of <i>zipM</i><br>into pKT25              |
| 60 | MB_26B | CTTACTTAGGTACCCGGGGGATGCGTATC<br>TAGCTATTAGATGTTC      | Cloning of <i>zipM</i><br>into pKT25              |
| 61 | MB_28A | TCTAGAGGATCCCCGGGTAATGCAACAAGT<br>CATAGTAAGTAATCGAT    | Cloning of <i>zipM</i><br>into pUT18C             |
| 62 | MB_28B | TCGATGAATTCGAGCTCGGGGATGCGTATC<br>TAGCTATTAGATGTTC     | Cloning of <i>zipM</i><br>into pUT18C             |
| 63 | MB_41A | TGCCTGCAGGTCGACTCTAATGGGGCGATT<br>TGAGAAGC             | Cloning of <i>sepJ</i><br>into pKNT25 or<br>pUT18 |
| 64 | MB_41B | TCGGTACCCGGGGATCCTCACCTTCTGCAT<br>TGGCAGG              | Cloning of <i>sepJ</i><br>into pKNT25 or<br>pUT18 |
| 65 | MB_42A | AGGGTCGACTCTAGAGGATATGGGGCGATT<br>TGAGAAGC             | Cloning of <i>sepJ</i><br>into pKT25              |
| 66 | MB_42B | CTTACTTAGGTACCCGGGGACCTTCTGCATT<br>GGCAGG              | Cloning of <i>sepJ</i><br>into pKT25              |
| 67 | MB_44A | TCTAGAGGATCCCCGGGTAATGGGGCGATT<br>TGAGAAGC             | Cloning of <i>sepJ</i><br>into pUT18C             |
| 68 | MB_44B | TCGATGAATTCGAGCTCGGACCTTCTGCATT<br>GGCAGG              | Cloning of <i>sepJ</i><br>into pUT18C             |
| 69 | MB_49A | ATGCCTGCAGGTCGACTCTAATGACACTTG<br>ATAATAACCAAGAGCTTACC | Cloning of <i>ftsZ</i> into<br>pKNT25 or pUT18    |
| 70 | MB_49B | CTCGGTACCCGGGGATCCTCATTTTTGGGT<br>GGTCGCCGTC           | Cloning of <i>ftsZ</i> into<br>pKNT25 or pUT18    |
| 71 | MB_50A | CAGGGTCGACTCTAGAGGATATGACACTTG<br>ATAATAACCAAGAGCTTACC | Cloning of <i>ftsZ</i> into<br>pKT25              |
| 72 | MB_50B | TACTTACTTAGGTACCCGGGGATTTTTGGGT<br>GGTCGCCGTC          | Cloning of <i>ftsZ</i> into<br>pKT25              |
| 73 | MB_52A | CTCTAGAGGATCCCCGGGTAATGACACTTG<br>ATAATAACCAAGAGCTTACC | Cloning of <i>ftsZ</i> into<br>pUT18C             |
| 74 | MB_52B | TATATCGATGAATTCGAGCTCGGATTTTTGG<br>GTGGTCGCCGTC        | Cloning of <i>ftsZ</i> into<br>pUT18C             |
| 75 | MB_53A | ATGCCTGCAGGTCGACTCTAATGGGGCTTT<br>TTAGGAACCTTTCG       | Cloning of <i>mreB</i><br>into pKNT25 or<br>pUT18 |
| 76 | MB_53B | CTCGGTACCCGGGGATCCTCCATATTTTCA<br>GATCGTCCGCTAAAAAC    | Cloning of <i>mreB</i><br>into pKNT25 or<br>pUT18 |

|    |            |                                                                          |                                                                                       |
|----|------------|--------------------------------------------------------------------------|---------------------------------------------------------------------------------------|
| 77 | MB_54A     | CAGGGTCGACTCTAGAGGATATGGGGCTTT<br>TTAGGAACCTTTCG                         | Cloning of <i>mreB</i><br>into pKT25                                                  |
| 78 | MB_54B     | TACTTACTTAGGTACCCGGGGCATATTTTCGA<br>GATCGTCCGCTAAAAAC                    | Cloning of <i>mreB</i><br>into pKT25                                                  |
| 79 | MB_56A     | CTCTAGAGGATCCCCGGGTAATGGGGCTTT<br>TTAGGAACCTTTCG                         | Cloning of <i>mreB</i><br>into pUT18C                                                 |
| 80 | MB_56B     | TATATCGATGAATTCGAGCTCGGCATATTTTC<br>GAGATCGTCCGCTAAAAAC                  | Cloning of <i>mreB</i><br>into pUT18C                                                 |
| 81 | MB_69A     | ATGCCTGCAGGTCGACTCTAATGTTTGAAGA<br>TTTGACTATACCCAGG                      | Cloning of <i>fraC</i><br>into pKNT25 or<br>pUT18                                     |
| 82 | MB_69B     | CTCGGTACCCGGGGATCCTCCCTATTACGT<br>ATCAATAAAATAATAGTTATAGCGGTG            | Cloning of <i>fraC</i><br>into pKNT25 or<br>pUT18                                     |
| 83 | MB_70A     | CAGGGTCGACTCTAGAGGATATGTTTGAAG<br>ATTTGACTATACCCAGG                      | Cloning of <i>fraC</i><br>into pKT25                                                  |
| 84 | MB_70B     | TACTTACTTAGGTACCCGGGGCCTATTACGT<br>ATCAATAAAATAATAGTTATAGCGGTG           | Cloning of <i>fraC</i><br>into pKT25                                                  |
| 85 | MB_72A     | CTCTAGAGGATCCCCGGGTAATGTTTGAAG<br>ATTTGACTATACCCAGG                      | Cloning of <i>fraC</i><br>into pUT18C                                                 |
| 86 | MB_72B     | ATATCGATGAATTCGAGCTCGGCCTATTACG<br>TATCAATAAAATAATAGTTATAGCGGTG          | Cloning of <i>fraC</i><br>into pUT18C                                                 |
| 87 | MB_73A     | ATGCCTGCAGGTCGACTCTAGTGAATTTATT<br>ATTTAAAGACCTTTTCGGAATATT              | Cloning of <i>fraD</i><br>into pKNT25 or<br>pUT18                                     |
| 88 | MB_73B     | CTCGGTACCCGGGGATCCTCCTGCTGCGGT<br>GGCGCTG                                | Cloning of <i>fraD</i><br>into pKNT25 or<br>pUT18                                     |
| 89 | MB_74A     | GGGTCGACTCTAGAGGATGTGAATTTATTAT<br>TTAAAGACCTTTTCGGAAT                   | Cloning of <i>fraD</i><br>into pKT25                                                  |
| 90 | MB_74B     | TACTTACTTAGGTACCCGGGGCTGCTGCGG<br>TGCGCTG                                | Cloning of <i>fraD</i><br>into pKT25                                                  |
| 91 | MB_76A     | CTAGAGGATCCCCGGGTAGTGAATTTATTAT<br>TTAAAGACCTTTTCGGAAT                   | Cloning of <i>fraD</i><br>into pUT18C                                                 |
| 92 | MB_76B     | TATATCGATGAATTCGAGCTCGGCTGCTGC<br>GGTGCGCTG                              | Cloning of <i>fraD</i><br>into pUT18C                                                 |
| 93 | pRL271_Fwd | GAGCTCGCGAAAGCTTGCATG                                                    | Amplification of<br>pRL278                                                            |
| 94 | pRL271_Rev | CTCGAGATCTAGATATCGAATTTCTGCCAT                                           | Amplification of<br>pRL278                                                            |
| 95 | CS.3_Fwd   | GATCCGTGCACAGCACCTTG                                                     | Amplification of<br>CS.3 cassette                                                     |
| 96 | CS.3_Rev   | TTATTTGCCGACTACCTTGGTGATCT                                               | Amplification of<br>CS.3 cassette                                                     |
| 97 | 903KO_2A   | ATTCGATATCTAGATCTCGAGAAGCAACGG<br>CAACGCC                                | Amplification of<br>upstream<br>homology region<br>for <i>zicK+zacK</i><br>deletion   |
| 98 | 903KO_2B   | AAGGTGCTGTGCACGGATCATTTCAACTCC<br>CTTGATTAGATAATGATTAATCGAG              | Amplification of<br>upstream<br>homology region<br>for <i>zicK+zacK</i><br>deletion   |
| 99 | 904KO_4A   | CAAGGTAGTCGGCAAATAAAATACAAATAAT<br>AAAAATAAATAAAAAGACGTAACGAAAATTA<br>CG | Amplification of<br>downstream<br>homology region<br>for <i>zicK+zacK</i><br>deletion |

|     |                   |                                                              |                                                                                                                       |
|-----|-------------------|--------------------------------------------------------------|-----------------------------------------------------------------------------------------------------------------------|
| 100 | 904KO_4B          | TGCAAGCTTTTCGCGAGCTCGTAGTGGGTTT<br>CGCACAAGCTATC             | Amplification of downstream homology region for <i>zicK+zacK</i> deletion                                             |
| 101 | 903KO_Seq_A       | TGCGAATTCCAGTAGGTCTTGGTAA                                    | cPCR verification of <i>zicK</i> and <i>zacK</i> deletion                                                             |
| 102 | 904KO_Seq_B       | GGTGGCGCAGAAGTATTTTTG                                        | cPCR verification of <i>zicK</i> and <i>zacK</i> deletion                                                             |
| 103 | p903_25C_long_A   | TTTTGGTCATGAGATTATCAAAAAGACCCGA<br>CACTCTTGAGG               | Amplification of P <sub>zicK</sub> :: <i>zicK-zacK</i> for pTHS169 and amplification of P <sub>zicK</sub> for pTHS167 |
| 104 | Nos904_25C_B      | GGCCCTTTCGTCTTCAAGTTATTTATTTTTCA<br>CTTGACTTTTTGCCTGT        | Amplification of P <sub>zicK</sub> :: <i>zicK-zacK</i> for pTHS169                                                    |
| 105 | pNos903_2B        | ACTGTCGTCATATTTCAACTCCCTTG                                   | Amplification of P <sub>zicK</sub> for pTHS167                                                                        |
| 106 | Nos903_pNos903_3A | GGAGTTGAAATATGACGACAGTTGCACTCA<br>AAG                        | Amplification of <i>zicK-gfp</i> for pTHS167                                                                          |
| 107 | GFP_25C_R         | AGGCCCTTTCGTCTTCAAGTTATTTGTATAG<br>TTCATCCATGCCATGTGT        | Amplification of <i>zicK-gfp</i> or <i>zacK-gfp</i> for pTHS167 or pTHS168                                            |
| 108 | pNos904_25C_F     | ATTTTGGTCATGAGATTATCAAAAAGAGAAA<br>TATCAGCTAGACGTAAAGAGTGG   | Amplification of P <sub>zacK</sub> for pTHS168                                                                        |
| 109 | pNos904_2B        | TGACTGCCATAAAAACCTCTATTTATTGC                                | Amplification of P <sub>zacK</sub> for pTHS168                                                                        |
| 110 | Nos904_pNos904_3A | AGAGTTTTTATGGCAGTCAAAAAGTTAACA<br>GACAAAAC                   | Amplification of <i>zacK-gfp</i> for pTHS168                                                                          |
| 111 | Vector.FOR        | TGATGTTCAACTTCGACAGCGAATTCCTCGA<br>CCTGCAGGG                 | Amplification of pIGA                                                                                                 |
| 112 | Vector.REV        | AGGGACTCTTCTCTACAGGTGGTACCCCGG<br>GTTCGAAATCG                | Amplification of pIGA                                                                                                 |
| 113 | Fragment 1.FOR    | GATTTCGAACCCGGGGTACCACCTGTAGAG<br>AAGAGTCCCTGAATATCAA        | Amplification of P <sub>pc560</sub> for pTHS170 and pTHS171                                                           |
| 114 | pIGA_Pcpc560_1B   | TGAATTAATCTCCTACTTGACTTTATGAGTTG<br>GG                       | Amplification of P <sub>pc560</sub> for pTHS170 and pTHS171                                                           |
| 115 | Nos903_pIGA_2A    | TAAAGTCAAGTAGGAGATTAATTCAATGACG<br>ACAGTTGCACTCAAAG          | Amplification of <i>zicK-gfp</i> for pTHS170                                                                          |
| 116 | Fragment 3.REV    | CCGACAATCCAAACACCGGTTTATTTGTATA<br>GTTTCATCCATGCCATGTGTAATCC | Amplification of <i>gfp</i> for pTHS170 and pTHS171                                                                   |
| 117 | Fragment 4.FOR    | TGGATGAACTATACAAATAAACCGGTGTTTG<br>GATTGTCGG                 | Amplification of T <sub>ribcL</sub> for pTHS170 and pTHS171                                                           |
| 118 | Fragment 4.REV    | CCCTGCAGGTCGAGGAATTCGCTGTCTGAAG<br>TTGAACATCAGTAAGC          | Amplification of T <sub>ribcL</sub> for pTHS170 and pTHS171                                                           |

|     |                |                                                        |                                                                 |
|-----|----------------|--------------------------------------------------------|-----------------------------------------------------------------|
| 119 | Nos904_pIGA_2A | TAAAGTCAAGTAGGAGATTAATTCAATGGCA<br>GTCAAAAAGTTAACAGACA | Amplification of <i>zacK-gfp</i> for pTHS171                    |
| 120 | Pcpc560_pIGA_A | AGGAGGAACTATATCCGGATACCTGTAGAG<br>AAGAGTCCCTGAATATC    | Amplification of P <sub>cpc560</sub> :: <i>zicK</i> for pTHS172 |
| 121 | CFP_pIGA_B     | ACCACACCCGTCCTGTGGATTTACTTGTACA<br>GCTCGTCCATGCC       | Second round of amplification of <i>ecfp</i> for pTHS172        |

Employed enzymatic cut sites are underlined.

## References

- Alberts, B., Johnson, A., Lewis, J., Morgan, D., Raff, M., Roberts, K., and Walter, P. (2014) *Molecular Biology of the Cell*. 6th editio., Garland Science, .
- Altschul, S.F., Gish, W., Miller, W., Myers, E.W., and Lipman, D.J. (1990) Basic local alignment search tool. *J Mol Biol* **215**: 403–410 <https://www.sciencedirect.com/science/article/pii/S0022283605803602?via%3Dihub>. Accessed January 26, 2019.
- Ausmees, N., Kuhn, J.R., and Jacobs-Wagner, C. (2003) The bacterial cytoskeleton: An intermediate filament-like function in cell shape. *Cell* **115**: 705–713.
- Bagchi, S., Tomenius, H., Belova, L.M., and Ausmees, N. (2008) Intermediate filament-like proteins in bacteria and a cytoskeletal function in *Streptomyces*. *Mol Microbiol* **70**: 1037–1050.
- Bermudes, D., Hinkle, G., and Margulis, L. (1994) Do prokaryotes contain microtubules? *Microbiol Rev* **58**: 387–400.
- Bhaya, D., Takahashi, A., Shahi, P., and Arthur, R. (2001) Novel Motility Mutants of *Synechocystis* Strain PCC 6803 Generated by In Vitro Transposon Mutagenesis Novel Motility Mutants of *Synechocystis* Strain PCC 6803 Generated by In Vitro Transposon Mutagenesis †. *J Bacteriol* **183**: 1–5.
- Bi, E., and Lutkenhaus, J. (1991) FtsZ ring structure associated with division in *Escherichia coli*. *Nature* **354**: 161–164 <http://www.nature.com/doifinder/10.1038/354161a0>.
- Birchler, J.A., Bhadra, U., Bhadra, M.P., and Auger, D.L. (2001) Dosage-Dependent Gene Regulation in Multicellular Eukaryotes: Implications for Dosage Compensation, Aneuploid Syndromes, and Quantitative Traits. *Dev Biol* **234**: 275–288 <http://www.sciencedirect.com/science/article/pii/S0012160601902623>.
- Blaauwen, T. den, Hamoen, L.W., and Levin, P.A. (2017) The divisome at 25: the road ahead. *Curr Opin Microbiol* **36**: 85–94 <http://dx.doi.org/10.1016/j.mib.2017.01.007>.
- Boer, P. de, Crossley, R., and Rothfield, L. (1992) The essential bacterial cell-division protein FtsZ is a GTPase. *Nature* **359**: 254–256 <http://www.nature.com/doifinder/10.1038/359254a0>.
- Boratyn, G.M., Schäffer, A.A., Agarwala, R., Altschul, S.F., Lipman, D.J., and Madden, T.L. (2012) Domain enhanced lookup time accelerated BLAST. *Biol Direct* **7**: 12 <https://pubmed.ncbi.nlm.nih.gov/22510480>.
- Bornikoel, J., Carrión, A., Fan, Q., Flores, E., Forchhammer, K., Mariscal, V., *et al.* (2017) Role of Two Cell Wall Amidases in Septal Junction and Nanopore Formation in the Multicellular Cyanobacterium *Anabaena* sp. PCC 7120. *Front Cell Infect Microbiol* **7**: 386.
- Boyer, H., and Roulland-Dessoix, D. (1969) A complementation analysis of the restriction and modification of DNA in *Escherichia coli*. *J Mol Biol* **41**: 459–472.
- Burnat, M., Schleiff, E., and Flores, E. (2014) Cell envelope components influencing filament length in the heterocyst-forming cyanobacterium *Anabaena* sp. strain PCC 7120. *J Bacteriol* **196**: 4026–4035.
- Cabeen, M.T., Charbon, G., Vollmer, W., Born, P., Ausmees, N., Weibel, D.B., and Jacobs-Wagner, C. (2009) Bacterial cell curvature through mechanical control of cell growth. *EMBO J* **28**: 1208–1219 <http://emboj.embopress.org/cgi/doi/10.1038/emboj.2009.61>.
- Cabeen, M.T., Herrmann, H., and Jacobs-Wagner, C. (2011) The domain organization of the bacterial intermediate filament-like protein crescentin is important for assembly and function.



*Cytoskeleton* **68**: 205–219.

Cai, Y., and Wolk, C.P. (1990) Use of a conditionally lethal gene in *Anabaena* sp. strain PCC 7120 to select for double recombinants and to entrap insertion sequences. *J Bacteriol* **172**: 3138–3145.

Camargo, S., Picossi, S., Corrales-Guerrero, L., Valladares, A., Arévalo, S., and Herrero, A. (2019) ZipN is an essential FtsZ membrane tether and contributes to the septal localization of SepJ in the filamentous cyanobacterium *Anabaena*. *Sci Rep* **9**: 1–15.

Camberg, J.L., Hoskins, J.R., and Wickner, S. (2009) ClpXP protease degrades the cytoskeletal protein, FtsZ, and modulates FtsZ polymer dynamics. *Proc Natl Acad Sci U S A* **106**: 10614–10619 <http://www.ncbi.nlm.nih.gov/pubmed/19541655>.

Charbon, G., Cabeen, M.T., and Jacobs-Wagner, C. (2009) Bacterial intermediate filaments: In vivo assembly, organization, and dynamics of crescentin. *Genes Dev* **23**: 1131–1144.

Chen, C., MacCready, J.S., Ducat, D.C., and Osteryoung, K.W. (2018) The molecular machinery of chloroplast division. *Plant Physiol* **176**: 138–151.

Cho, Y.W., Gonzales, A., Harwood, T. V, Huynh, J., Hwang, Y., Park, J.S., *et al.* (2017) Dynamic localization of HmpF regulates type IV pilus activity and directional motility in the filamentous cyanobacterium *Nostoc punctiforme*. *Mol Microbiol* **106**: 252–265.

Choi, Y., Kim, J., Yoon, H.-J., Jin, K.S., Ryu, S., and Lee, H.H. (2018) Structural Insights into the FtsQ/FtsB/FtsL Complex, a Key Component of the Divisome. *Sci Rep* **8**: 18061 <https://pubmed.ncbi.nlm.nih.gov/30584256>.

Claessen, D., Rozen, D.E., Kuipers, O.P., Søgaard-Andersen, L., and Wezel, G.P. Van (2014) Bacterial solutions to multicellularity: A tale of biofilms, filaments and fruiting bodies. *Nat Rev Microbiol* **12**: 115–124 <http://dx.doi.org/10.1038/nrmicro3178>.

Cohen, S.E., Erb, M.L., Selimkhanov, J., Dong, G., Hasty, J., Pogliano, J., and Golden, S.S. (2014) Dynamic localization of the cyanobacterial circadian clock proteins. *Curr Biol* **24**: 1836–1844 <http://dx.doi.org/10.1016/j.cub.2014.07.036>.

Corrales-Guerrero, L., Camargo, S., Valladares, A., Picossi, S., Luque, I., Ochoa De Alda, J.A.G., and Herrero, A. (2018) FtsZ of filamentous, heterocyst-forming cyanobacteria has a conserved N-terminal peptide required for normal FtsZ polymerization and cell division. *Front Microbiol* **9**: 1–20.

Corrales-Guerrero, L., Mariscal, V., Flores, E., and Herrero, A. (2013) Functional dissection and evidence for intercellular transfer of the heterocyst-differentiation PatS morphogen. *Mol Microbiol* **88**: 1093–1105.

Dagan, T., Roettger, M., Stucken, K., Landan, G., Koch, R., Major, P., *et al.* (2013) Genomes of stigonematalean cyanobacteria (subsection V) and the evolution of oxygenic photosynthesis from prokaryotes to plastids. *Genome Biol Evol* **5**: 31–44.

Daniel, R.A., and Errington, J. (2003) Control of cell morphogenesis in bacteria: Two distinct ways to make a rod-shaped cell. *Cell* **113**: 767–776.

Du, Y., Cai, Y., Hou, S., and Xu, X. (2012) Identification of the HetR Recognition Sequence Upstream of *hetZ* in *Anabaena* sp. Strain PCC 7120. *J Bacteriol* **194**: 2297 LP – 2306 <http://jb.asm.org/content/194/9/2297.abstract>.

Ehira, S., Ohmori, M., and Sato, N. (2005) Identification of Low-temperature-regulated ORFs in the Cyanobacterium *Anabaena* sp. Strain PCC 7120: Distinguishing the Effects of Low

Temperature from the Effects of Photosystem II Excitation Pressure. *Plant Cell Physiol* **46**: 1237–1245 <https://doi.org/10.1093/pcp/pci132>.

England, P., Bourhy, P., Picardeau, M., Girons, I. Saint, Mazouni, K., and Pehau-Arnaudet, G. (2005) The Scc Spirochetal Coiled-Coil Protein Forms Helix-Like Filaments and Binds to Nucleic Acids Generating Nucleoprotein Structures. *J Bacteriol* **188**: 469–476.

Ent, F. van den, Amos, L.A., and Löwe, J. (2001) Prokaryotic origin of the actin cytoskeleton. *Nature* **413**: 39–44 [vanDenEnt\\_2001\\_Nature\\_413\(9\)-39.pdf](https://doi.org/10.1038/413039a).

Erickson, H.P. (2007) Evolution of the cytoskeleton. *Bioessays* **29**: 668–677.

Errington, J., and Wu, L.J. (2017) Cell Cycle Machinery in *Bacillus subtilis*. Springer, Cham, pp. 67–101 [http://link.springer.com/10.1007/978-3-319-53047-5\\_3](http://link.springer.com/10.1007/978-3-319-53047-5_3). Accessed February 18, 2018.

Fenton, A.K., Mortaji, L. El, Lau, D.T.C., Rudner, D.Z., and Bernhardt, T.G. (2016) CozE is a member of the MreCD complex that directs cell elongation in *Streptococcus pneumoniae*. *Nat Microbiol* **2**: 1–9 [http://dx.doi.org/10.1038/nmicrobiol.2016.237](https://doi.org/10.1038/nmicrobiol.2016.237).

Fiedler, G., Arnold, M., Hannus, S., and Maldener, I. (1998) The DevBCA exporter is essential for envelope formation in heterocysts of the cyanobacterium *Anabaena* sp. strain PCC 7120. *Mol Microbiol* **27**: 1193–1202 <https://doi.org/10.1046/j.1365-2958.1998.00762.x>.

Flärdh, K., Richards, D.M., Hempel, A.M., Howard, M., and Buttner, M.J. (2012) Regulation of apical growth and hyphal branching in *Streptomyces*. *Curr Opin Microbiol* **15**: 737–743 <http://www.sciencedirect.com/science/article/pii/S136952741200152X>.

Flores, E., Herrero, A., Forchhammer, K., and Maldener, I. (2016) Septal Junctions in Filamentous Heterocyst-Forming Cyanobacteria. *Trends Microbiol* **24**: 79–82 [http://dx.doi.org/10.1016/j.tim.2015.11.011](https://doi.org/10.1016/j.tim.2015.11.011).

Flores, E., Nieves-Mori3n, M., and Mullineaux, C. (2018) Cyanobacterial Septal Junctions: Properties and Regulation. *Life* **9**: 1.

Flores, E., Pernil, R., Muro-Pastor, A.M., Mariscal, V., Maldener, I., Lechno-Yossef, S., *et al.* (2007) Septum-localized protein required for filament integrity and diazotrophy in the heterocyst-forming cyanobacterium *Anabaena* sp. strain PCC 7120. *J Bacteriol* **189**: 3884–3890.

Fr3jd, M.J., and Flärdh, K. (2019) Apical assemblies of intermediate filament-like protein FilP are highly dynamic and affect polar growth determinant DivIVA in *Streptomyces venezuelae*. *Mol Microbiol* **112**: 47–61.

Fuchs, E., and Weber, K. (1994) INTERMEDIATE FILAMENTS: Structure, Dynamics, Function and Disease. *Annu Rev Biochem* **63**: 345–382.

Grant, S.G., Jessee, J., Bloom, F.R., and Hanahan, D. (1990) Differential plasmid rescue from transgenic mouse DNAs into *Escherichia coli* methylation-restriction mutants. *Proc Natl Acad Sci* **87**: 4645–4649 <http://www.pnas.org/cgi/doi/10.1073/pnas.87.12.4645>.

Heins, S., and Aebi, U. (1994) Making heads and tails of intermediate filament assembly, dynamics and networks. *Curr Opin Cell Biol* **6**: 25–33.

Herrero, A., Stavans, J., and Flores, E. (2016) The multicellular nature of filamentous heterocyst-forming cyanobacteria. *FEMS Microbiol Rev* **40**: 831–854.

Herrmann, H., and Aebi, U. (2000) Intermediate filaments and their associates: Multi-talented structural elements specifying cytoarchitecture and cytodynamics. *Curr Opin Cell Biol* **12**: 79–

90.

Holmes, N.A., Walshaw, J., Leggett, R.M., Thibessard, A., Dalton, K.A., Gillespie, M.D., *et al.* (2013) Coiled-coil protein Scy is a key component of a multiprotein assembly controlling polarized growth in *Streptomyces*. *Proc Natl Acad Sci* **110**: E397–E406 <http://www.pnas.org/cgi/doi/10.1073/pnas.1210657110>.

Hu, B., Yang, G., Zhao, W., Zhang, Y., and Zhao, J. (2007) MreB is important for cell shape but not for chromosome segregation of the filamentous cyanobacterium *Anabaena* sp. PCC 7120. *Mol Microbiol* **63**: 1640–1652.

Ingerson-Mahar, M., Briegel, A., Werner, J.N., Jensen, G.J., and Gitai, Z. (2010) The metabolic enzyme CTP synthase forms cytoskeletal filaments. *Nat Cell Biol* **12**: 739–746.

Javadi, A., Söderholm, N., Olofsson, A., Flärdh, K., and Sandblad, L. (2019) Assembly mechanisms of the bacterial cytoskeletal protein FilP. *Life Sci Alliance* **2**: e201800290.

Jensen, T.E., and Ayala, R.P. (1980) Microtubule-like Inclusions in Isolates of the Blue-green Bacteria *Anabaena* and *Nostoc*. *Cytologia (Tokyo)* **45**: 315–326.

Jones, L.J.F., Carballido-López, R., and Errington, J. (2001) Control of cell shape in bacteria: Helical, actin-like filaments in *Bacillus subtilis*. *Cell* **104**: 913–922.

Karimova, G., Davi, M., and Ladant, D. (2012) The  $\beta$ -lactam resistance protein Blr, a small membrane polypeptide, is a component of the *Escherichia coli* cell division machinery. *J Bacteriol* **194**: 5576–5588.

Kelemen, G.H. (2017) Intermediate Filaments Supporting Cell Shape and Growth in Bacteria BT - Prokaryotic Cytoskeletons: Filamentous Protein Polymers Active in the Cytoplasm of Bacterial and Archaeal Cells. In Löwe, J., and Amos, L.A. (eds). Springer International Publishing, Cham. pp. 161–211 [https://doi.org/10.1007/978-3-319-53047-5\\_6](https://doi.org/10.1007/978-3-319-53047-5_6).

Kieninger, A.K., Forchhammer, K., and Maldener, I. (2019) A nanopore array in the septal peptidoglycan hosts gated septal junctions for cell-cell communication in multicellular cyanobacteria. *Int J Med Microbiol* **309**: 151303 <https://doi.org/10.1016/j.ijmm.2019.03.007>.

Klint, J., Rasmussen, U., and Bergman, B. (2007) FtsZ may have dual roles in the filamentous cyanobacterium *Nostoc/Anabaena* sp. strain PCC 7120. *J Plant Physiol* **164**: 11–18.

Köster, S., Weitz, D.A., Goldman, R.D., Aebi, U., and Herrmann, H. (2015) Intermediate filament mechanics in vitro and in the cell: From coiled coils to filaments, fibers and networks. *Curr Opin Cell Biol* **32**: 82–91.

Kühn, J., Briegel, A., Mörschel, E., Kahnt, J., Leser, K., Wick, S., *et al.* (2010) Bactofilins, a ubiquitous class of cytoskeletal proteins mediating polar localization of a cell wall synthase in *Caulobacter crescentus*. *EMBO J* **29**: 327–339.

Kunert, A., Hagemann, M., and Erdmann, N. (2000) Construction of promoter probe vectors for *Synechocystis* sp. PCC 6803 using the light-emitting reporter systems Gfp and LuxAB. *J Microbiol Methods* **41**: 185–194.

Lázaro, S., Fernández-Piñas, F., Fernández-Valiente, E., Blanco-Rivero, A., and Leganés, F. (2001) pbpB, a gene coding for a putative penicillin-binding protein, is required for aerobic nitrogen fixation in the cyanobacterium *Anabaena* sp. strain PCC7120. *J Bacteriol* **183**: 628–636.

Leganés, F., Blanco-Rivero, A., Fernández-Piñas, F., Redondo, M., Fernández-Valiente, E., Fan, Q., *et al.* (2005) Wide variation in the cyanobacterial complement of presumptive penicillin-binding proteins. *Arch Microbiol* **184**: 234–248.

- Lehner, J., Berendt, S., Dörsam, B., Pérez, R., Forchhammer, K., and Maldener, I. (2013) Prokaryotic multicellularity: A nanopore array for bacterial cell communication. *FASEB J* **27**: 2293–2300.
- Letek, M., Ordóñez, E., Vaquera, J., Margolin, W., Flärdh, K., Mateos, L.M., and Gil, J.A. (2008) DivIVA is required for polar growth in the MreB-lacking rod-shaped actinomycete *Corynebacterium glutamicum*. *J Bacteriol* **190**: 3283–3292.
- Leung, C.L., Green, K.J., and Liem, R.K.H. (2002) Plakins: A family of versatile cytolinker proteins. *Trends Cell Biol* **12**: 37–45.
- Lin, L., and Thanbichler, M. (2013) Nucleotide-independent cytoskeletal scaffolds in bacteria. *Cytoskeleton* **70**: 409–423.
- Löwe, J., and Amos, L.A. (1998) Crystal structure of the bacterial cell division protein FtsZ. *Nature* **391**: 203–206.
- Lupas, A., Dyke, M. Van, and Stock, J. (1991) Predicting coiled coils from protein sequences. *Science* (80- ) **252**: 1162–1164  
<http://www.sciencemag.org/cgi/doi/10.1126/science.252.5009.1162>.
- Lutkenhaus, J. (2012) The ParA/MinD family puts things in their place. *Trends Microbiol* **20**: 411–418.
- MacCready, J.S., Schossau, J., Osteryoung, K.W., and Ducat, D.C. (2017) Robust Min-system oscillation in the presence of internal photosynthetic membranes in cyanobacteria. *Mol Microbiol* **103**: 483–503.
- Marchler-Bauer, A., Bo, Y., Han, L., He, J., Lanczycki, C.J., Lu, S., *et al.* (2016) CDD/SPARCLE: functional classification of proteins via subfamily domain architectures. *Nucleic Acids Res* **45**: D200–D203.
- Mason, J.M., and Arndt, K.M. (2004) Coiled coil domains: Stability, specificity, and biological implications. *ChemBioChem* **5**: 170–176.
- Mohr, R., Voß, B., Schliep, M., Kurz, T., Maldener, I., Adams, D.G., *et al.* (2010) A new chlorophyll d-containing cyanobacterium: evidence for niche adaptation in the genus *Acaryochloris*. *ISME J* **4**: 1456–1469 <https://doi.org/10.1038/ismej.2010.67>.
- Mullineaux, C.W., Mariscal, V., Nenninger, A., Khanum, H., Herrero, A., Flores, E., and Adams, D.G. (2008) Mechanism of intercellular molecular exchange in heterocyst-forming cyanobacteria. *EMBO J* **27**: 1299–1308.
- Nieves-Morión, M., Lechno-Yossef, S., López-Igual, R., Frías, J.E., Mariscal, V., Nürnberg, D.J., *et al.* (2017) Specific Glucoside Transporters Influence Septal Structure and Function in the Filamentous, Heterocyst-Forming Cyanobacterium *Anabaena* sp. Strain PCC 7120. *J Bacteriol* **199**: e00876-16 <https://www.ncbi.nlm.nih.gov/pubmed/28096449>.
- Nogales, E., Downing, K.H., Amos, L.A., and Löwe, J. (1998) Tubulin and FtsZ form a distinct family of GTPases. *Nat Struct Biol* **5**: 451–458.
- Olmedo-Verd, E., Muro-Pastor, A.M., Flores, E., and Herrero, A. (2006) Localized induction of the *ntcA* regulatory gene in developing heterocysts of *Anabaena* sp. strain PCC 7120. *J Bacteriol* **188**: 6694–6699.
- Park, A., Jeong, H.-H., Lee, J., Kim, K.P., and Lee, C.-S. (2011) Effect of shear stress on the formation of bacterial biofilm in a microfluidic channel. *BioChip J* **5**: 236–241 <http://link.springer.com/10.1007/s13206-011-5307-9>.

Persat, A., Nadell, C.D., Kim, M.K., Ingremeau, F., Siryaporn, A., Drescher, K., *et al.* (2015) The mechanical world of bacteria. *Cell* **161**: 988–997 <http://dx.doi.org/10.1016/j.cell.2015.05.005>.

Putte, P. Van De, Dillewijn, J. Van, and Rörsch, A. (1964) The selection of mutants of escherichia coli with impaired cell division at elevated temperature. *Mutat Res - Fundam Mol Mech Mutagen* **1**: 121–128.

Ramos-León, F., Mariscal, V., Battchikova, N., Aro, E.M., and Flores, E. (2017) Septal protein SepJ from the heterocyst-forming cyanobacterium Anabaena forms multimers and interacts with peptidoglycan. *FEBS Open Bio* **7**: 1515–1526.

Ramos-León, F., Mariscal, V., Frías, J.E., Flores, E., and Herrero, A. (2015) Divisome-dependent subcellular localization of cell-cell joining protein SepJ in the filamentous cyanobacterium Anabaena. *Mol Microbiol* **96**: 566–580.

Rippka, R., Stanier, R.Y., Deruelles, J., Herdman, M., and Waterbury, J.B. (1979) Generic Assignments, Strain Histories and Properties of Pure Cultures of Cyanobacteria. *Microbiology* **111**: 1–61 <http://www.microbiologyresearch.org/content/journal/micro/10.1099/00221287-111-1-1>.

Rojas, E.R., and Huang, K.C. (2018) Regulation of microbial growth by turgor pressure. *Curr Opin Microbiol* **42**: 62–70 <https://doi.org/10.1016/j.mib.2017.10.015>.

Rudolf, M., Tetik, N., Ramos-León, F., Flinner, N., Ngo, G., Stevanovic, M., *et al.* (2015) The Peptidoglycan-Binding Protein SjcF1 Influences Septal Junction Function and Channel Formation in the Filamentous Cyanobacterium Anabaena. *MBio* **6**: e00376-15 <http://mbio.asm.org/content/6/4/e00376-15.abstract>.

Sakr, S., Jeanjean, R., Zhang, C.-C., and Arcondeguy, T. (2006a) Inhibition of cell division suppresses heterocyst development in Anabaena sp. strain PCC 7120. *J Bacteriol* **188**: 1396–1404 <http://jlb.asm.org/content/188/4/1396.short>.

Sakr, S., Thyssen, M., Denis, M., and Zhang, C.C. (2006b) Relationship among several key cell cycle events in the developmental cyanobacterium Anabaena sp. strain PCC 7120. *J Bacteriol* **188**: 5958–5965.

Schlieper, D., Oliva, M. a, Andreu, J.M., and Löwe, J. (2005) Structure of bacterial tubulin BtubA/B: evidence for horizontal gene transfer. *Proc Natl Acad Sci U S A* **102**: 9170–9175.

Schneider, C.A., Rasband, W.S., and Eliceiri, K.W. (2012) NIH Image to ImageJ: 25 years of image analysis. *Nat Methods* **9**: 671 <https://doi.org/10.1038/nmeth.2089>.

Schumacher, D., and Søgaard-Andersen, L. (2017) Regulation of Cell Polarity in Motility and Cell Division in Myxococcus xanthus. *Annu Rev Microbiol Regul* **71**: 61–78 <http://core.ac.uk/download/pdf/10697515.pdf>.

Schwedock, J., McCormick, J.R., Angert, E.R., Nodwell, J.R., and Losick, R. (1997) Assembly of the cell division protein FtsZ into ladder-like structures in the aerial hyphae of Streptomyces coelicolor. *Mol Microbiol* **25**: 847–858 <https://doi.org/10.1111/j.1365-2958.1997.mmi507.x>.

Shieh, Y.-W., Minguez, P., Bork, P., Auburger, J.J., Guilbride, D.L., Kramer, G., and Bukau, B. (2015) Operon structure and cotranslational subunit association direct protein assembly in bacteria. *Science* (80- ) **350**: 678 LP – 680 <http://science.sciencemag.org/content/350/6261/678.abstract>.

Singh, S.P., and Montgomery, B.L. (2011) Determining cell shape: adaptive regulation of cyanobacterial cellular differentiation and morphology. *Trends Microbiol* **19**: 278–285 <https://doi.org/10.1016/j.tim.2011.03.001>.



- Solovyev, V., and Salamov, A. (2011) Automatic Annotation of Microbial Genomes and Metagenomic Sequences. In *Metagenomics and its Applications in Agriculture, Biomedicine and Environmental Studies*. Robert W. Li, pp (ed.). Nova Science Publishers, Inc., pp. 61–78.
- Sonnhammer, E.L., Heijne, G. von, and Krogh, A. (1998) A hidden Markov model for predicting transmembrane helices in protein sequences. *Proceedings* **6**: 175–182.
- Specht, M., Schätzle, S., Graumann, P.L., and Waidner, B. (2011) *Helicobacter pylori* Possesses Four Coiled-Coil-Rich Proteins That Form Extended Filamentous Structures and Control Cell Shape and Motility. *J Bacteriol* **193**: 4523–4530.
- Springstein, B.L., Arévalo, S., Helbig, A.O., Herrero, A., Stucken, K., Flores, E., and Dagan, T. (2020a) A novel septal protein of multicellular heterocystous cyanobacteria is associated with the divisome. *Mol Microbiol* 1–15.
- Springstein, B.L., Woehle, C., Weissenbach, J., Helbig, A.O., Dagan, T., and Stucken, K. (2020b) Identification and characterization of novel filament-forming proteins in cyanobacteria. *Sci Rep* **10**: 1894 <https://doi.org/10.1038/s41598-020-58726-9>.
- Studier, F.W., and Moffatt, B.A. (1986) Use of bacteriophage T7 RNA polymerase to direct selective high-level expression of cloned genes. *J Mol Biol* **189**: 113–130.
- Surovtsev, I. V, and Jacobs-Wagner, C. (2018) Subcellular organization: a critical feature of bacterial cell replication. *Cell* **172**: 1271–1293.
- Svetlitsky, D., Dagan, T., and Ziv-Ukelson, M. (2020) Discovery of multi-operon colinear syntenic blocks in microbial genomes. *Bioinformatics* **accepted a**.
- Typas, A., Banzhaf, M., Gross, C.A., and Vollmer, W. (2012) From the regulation of peptidoglycan synthesis to bacterial growth and morphology. *Nat Rev Microbiol* **10**: 123–136 <http://dx.doi.org/10.1038/nrmicro2677>.
- Ungerer, J., and Pakrasi, H.B. (2016) Cpf1 Is A Versatile Tool for CRISPR Genome Editing Across Diverse Species of Cyanobacteria. *Sci Rep* **6**: 1–9 <http://dx.doi.org/10.1038/srep39681>.
- Urrejola, C., Dassow, P. von, Engh, G. van den, Salas, L., Mullineaux, C.W., Vicuña, R., and Sanchez-Baracaldo, P. (2020) Loss of filamentous multicellularity in Cyanobacteria - the extremophile <em>Gloeocapsopsis</em> sp. UTEX B3054 retained multicellular features at the genomic and behavioral level. *J Bacteriol* JB.00514-19 <http://jb.asm.org/content/early/2020/03/31/JB.00514-19.abstract>.
- Wagstaff, J., and Löwe, J. (2018) Prokaryotic cytoskeletons: protein filaments organizing small cells. *Nat Rev Microbiol* <http://www.nature.com/doi/10.1038/nrmicro.2017.153>.
- Weiss, G.L., Kieninger, A.-K., Maldener, I., Forchhammer, K., and Pilhofer, M. (2019) Structure and Function of a Bacterial Gap Junction Analog. *Cell* **178**: 374-384.e15 <https://www.sciencedirect.com/science/article/pii/S0092867419306269?via%3Dihub>. Accessed August 2, 2019.
- Weissenbach, J., Ilhan, J., Bogumil, D., Hülter, N., Stucken, K., and Dagan, T. (2017) Evolution of Chaperonin Gene Duplication in Stigonematalean Cyanobacteria (Subsection V). *Genome Biol Evol* **9**: 241–252 <https://dx.doi.org/10.1093/gbe/evw287>.
- Wickstead, B., and Gull, K. (2011) The evolution of the cytoskeleton. *J Cell Biol* **194**: 513–525.
- Wilk, L., Strauss, M., Rudolf, M., Nicolaisen, K., Flores, E., Kühlbrandt, W., and Schleiff, E. (2011) Outer membrane continuity and septosome formation between vegetative cells in the filaments of *Anabaena* sp. PCC 7120. *Cell Microbiol* **13**: 1744–1754.

- Wilson, C.G.M., Magliery, T.J., and Regan, L. (2004) Detecting protein-protein interactions with GFP-fragment reassembly. *Nat Methods* **1**: 255–262.
- Wolk, C.P., Cai, Y., Cardemil, L., Flores, E., Hohn, B., Murry, M., *et al.* (1988) Isolation and complementation of mutants of *Anabaena* sp. strain PCC 7120 unable to grow aerobically on dinitrogen. *J Bacteriol* **170**: 1239–1244.
- Yang, R., Bartle, S., Otto, R., Rogers, M., Plamann, L., Hartzell, P.L., and Stassinopoulos, A. (2004) AglZ Is a Filament-Forming Coiled-Coil Protein Required for Adventurous Gliding Motility of *Myxococcus xanthus*. *J Bacteriol* **186**: 6168–6178.
- Yang, Y., Huang, X.-Z., Wang, L., Risoul, V., Zhang, C.-C., and Chen, W.-L. (2013) Phenotypic variation caused by variation in the relative copy number of pDU1-based plasmids expressing the GAF domain of Pkn41 or Pkn42 in *Anabaena* sp. PCC 7120. *Res Microbiol* **164**: 127–135 <http://www.sciencedirect.com/science/article/pii/S0923250812001556>.
- Young, K.D. (2006) The selective value of bacterial shape. *Microbiol Mol Biol Rev* **70**: 660–703 <https://www.ncbi.nlm.nih.gov/pubmed/16959965>.
- Zhang, C.-C.C., Hugenin, S., Friry, A., Huguenin, S., and Friry, A. (1995) Analysis of genes encoding the cell division protein FtsZ and a glutathione synthetase homologue in the cyanobacterium *Anabaena* sp. PCC 7120. *Res Microbiol* **146**: 445–455 <http://www.sciencedirect.com/science/article/pii/0923250896802907>.
- Zhang, Y. (2009) I-TASSER: Fully automated protein structure prediction in CASP8. *Proteins Struct Funct Bioinforma* **77**: 100–113.
